# Supplementary material
Source: MDPI journal article supplement (https://www.mdpi.com/2411-9660/3/3/46)
Supplement: s1 [file s1]

solid component1:Electrifi
  facet normal -0.000000e+00 -0.000000e+00 -1.000000e+00
    outer loop
      vertex 3.219961e-01 5.793077e+00 1.476000e+00
      vertex -1.334196e+01 5.793077e+00 1.476000e+00
      vertex -5.643957e+00 1.349108e+01 1.476000e+00
    endloop
  endfacet
  facet normal -0.000000e+00 -0.000000e+00 -1.000000e+00
    outer loop
      vertex -4.586602e+01 1.967698e+01 1.476000e+00
      vertex -4.586602e+01 1.349108e+01 1.476000e+00
      vertex -5.000000e+01 5.000000e+01 1.476000e+00
    endloop
  endfacet
  facet normal -0.000000e+00 -0.000000e+00 -1.000000e+00
    outer loop
      vertex -4.586602e+01 5.793077e+00 1.476000e+00
      vertex -4.413398e+01 5.793077e+00 1.476000e+00
      vertex -4.586602e+01 4.280970e+00 1.476000e+00
    endloop
  endfacet
  facet normal -0.000000e+00 -0.000000e+00 -1.000000e+00
    outer loop
      vertex -5.000000e+01 5.000000e+01 1.476000e+00
      vertex -4.586602e+01 1.197897e+01 1.476000e+00
      vertex -4.586602e+01 5.793077e+00 1.476000e+00
    endloop
  endfacet
  facet normal -0.000000e+00 -0.000000e+00 -1.000000e+00
    outer loop
      vertex -4.586602e+01 1.349108e+01 1.476000e+00
      vertex -4.586602e+01 1.197897e+01 1.476000e+00
      vertex -5.000000e+01 5.000000e+01 1.476000e+00
    endloop
  endfacet
  facet normal -0.000000e+00 -0.000000e+00 -1.000000e+00
    outer loop
      vertex -4.413398e+01 1.349108e+01 1.476000e+00
      vertex -4.586602e+01 1.197897e+01 1.476000e+00
      vertex -4.586602e+01 1.349108e+01 1.476000e+00
    endloop
  endfacet
  facet normal -0.000000e+00 -0.000000e+00 -1.000000e+00
    outer loop
      vertex -4.413398e+01 1.197897e+01 1.476000e+00
      vertex -4.586602e+01 1.197897e+01 1.476000e+00
      vertex -4.413398e+01 1.349108e+01 1.476000e+00
    endloop
  endfacet
  facet normal -0.000000e+00 -0.000000e+00 -1.000000e+00
    outer loop
      vertex 1.571800e+01 1.349108e+01 1.476000e+00
      vertex 1.745005e+01 1.349108e+01 1.476000e+00
      vertex 2.341601e+01 5.793077e+00 1.476000e+00
    endloop
  endfacet
  facet normal -0.000000e+00 -0.000000e+00 -1.000000e+00
    outer loop
      vertex 8.020000e+00 3.658509e+01 1.476000e+00
      vertex 9.752050e+00 3.658509e+01 1.476000e+00
      vertex 8.020000e+00 2.737498e+01 1.476000e+00
    endloop
  endfacet
  facet normal -0.000000e+00 -0.000000e+00 -1.000000e+00
    outer loop
      vertex 9.752050e+00 4.277099e+01 1.476000e+00
      vertex 8.020000e+00 4.277099e+01 1.476000e+00
      vertex 5.000000e+01 5.000000e+01 1.476000e+00
    endloop
  endfacet
  facet normal -0.000000e+00 -0.000000e+00 -1.000000e+00
    outer loop
      vertex -7.376008e+00 -3.269694e+01 1.476000e+00
      vertex -5.643957e+00 -3.269694e+01 1.476000e+00
      vertex -7.376008e+00 -4.190705e+01 1.476000e+00
    endloop
  endfacet
  facet normal -0.000000e+00 -0.000000e+00 -1.000000e+00
    outer loop
      vertex -1.507401e+01 -4.809295e+01 1.476000e+00
      vertex -1.334196e+01 -4.809295e+01 1.476000e+00
      vertex -5.000000e+01 -5.000000e+01 1.476000e+00
    endloop
  endfacet
  facet normal -0.000000e+00 -0.000000e+00 -1.000000e+00
    outer loop
      vertex -1.507401e+01 1.197897e+01 1.476000e+00
      vertex -2.873797e+01 1.197897e+01 1.476000e+00
      vertex -2.873797e+01 1.349108e+01 1.476000e+00
    endloop
  endfacet
  facet normal -0.000000e+00 -0.000000e+00 -1.000000e+00
    outer loop
      vertex -1.507401e+01 1.197897e+01 1.476000e+00
      vertex -2.873797e+01 5.793077e+00 1.476000e+00
      vertex -2.873797e+01 1.197897e+01 1.476000e+00
    endloop
  endfacet
  facet normal -0.000000e+00 -0.000000e+00 -1.000000e+00
    outer loop
      vertex -1.507401e+01 5.793077e+00 1.476000e+00
      vertex -2.873797e+01 5.793077e+00 1.476000e+00
      vertex -1.507401e+01 1.197897e+01 1.476000e+00
    endloop
  endfacet
  facet normal -0.000000e+00 -0.000000e+00 -1.000000e+00
    outer loop
      vertex -4.413398e+01 -4.809295e+01 1.476000e+00
      vertex -4.413398e+01 -4.190705e+01 1.476000e+00
      vertex -3.047002e+01 -4.039494e+01 1.476000e+00
    endloop
  endfacet
  facet normal -0.000000e+00 -0.000000e+00 -1.000000e+00
    outer loop
      vertex -4.586602e+01 -4.809295e+01 1.476000e+00
      vertex -4.413398e+01 -4.809295e+01 1.476000e+00
      vertex -5.000000e+01 -5.000000e+01 1.476000e+00
    endloop
  endfacet
  facet normal -0.000000e+00 -0.000000e+00 -1.000000e+00
    outer loop
      vertex -3.047002e+01 1.197897e+01 1.476000e+00
      vertex -2.873797e+01 1.349108e+01 1.476000e+00
      vertex -2.873797e+01 1.197897e+01 1.476000e+00
    endloop
  endfacet
  facet normal -0.000000e+00 -0.000000e+00 -1.000000e+00
    outer loop
      vertex -3.047002e+01 1.349108e+01 1.476000e+00
      vertex -2.873797e+01 1.349108e+01 1.476000e+00
      vertex -3.047002e+01 1.197897e+01 1.476000e+00
    endloop
  endfacet
  facet normal -0.000000e+00 -0.000000e+00 -1.000000e+00
    outer loop
      vertex -1.334196e+01 -2.651105e+01 1.476000e+00
      vertex -1.507401e+01 -2.651105e+01 1.476000e+00
      vertex -2.103996e+01 -1.881304e+01 1.476000e+00
    endloop
  endfacet
  facet normal -0.000000e+00 -0.000000e+00 -1.000000e+00
    outer loop
      vertex -1.507401e+01 3.507298e+01 1.476000e+00
      vertex -1.507401e+01 2.888709e+01 1.476000e+00
      vertex -2.103996e+01 2.737498e+01 1.476000e+00
    endloop
  endfacet
  facet normal -0.000000e+00 -0.000000e+00 -1.000000e+00
    outer loop
      vertex -7.376008e+00 -2.651105e+01 1.476000e+00
      vertex -5.643957e+00 -1.730093e+01 1.476000e+00
      vertex -5.643957e+00 -2.651105e+01 1.476000e+00
    endloop
  endfacet
  facet normal -0.000000e+00 -0.000000e+00 -1.000000e+00
    outer loop
      vertex -7.376008e+00 -1.730093e+01 1.476000e+00
      vertex -5.643957e+00 -1.730093e+01 1.476000e+00
      vertex -7.376008e+00 -2.651105e+01 1.476000e+00
    endloop
  endfacet
  facet normal -0.000000e+00 -0.000000e+00 -1.000000e+00
    outer loop
      vertex 2.054047e+00 -3.420905e+01 1.476000e+00
      vertex 8.020000e+00 -3.420905e+01 1.476000e+00
      vertex 2.054047e+00 -4.039494e+01 1.476000e+00
    endloop
  endfacet
  facet normal -0.000000e+00 -0.000000e+00 -1.000000e+00
    outer loop
      vertex 2.054047e+00 -3.420905e+01 1.476000e+00
      vertex 8.020000e+00 -2.499894e+01 1.476000e+00
      vertex 8.020000e+00 -3.420905e+01 1.476000e+00
    endloop
  endfacet
  facet normal -0.000000e+00 -0.000000e+00 -1.000000e+00
    outer loop
      vertex 2.054047e+00 -2.499894e+01 1.476000e+00
      vertex 8.020000e+00 -2.499894e+01 1.476000e+00
      vertex 2.054047e+00 -3.420905e+01 1.476000e+00
    endloop
  endfacet
  facet normal -0.000000e+00 -0.000000e+00 -1.000000e+00
    outer loop
      vertex 2.054047e+00 -2.499894e+01 1.476000e+00
      vertex 8.020000e+00 -1.881304e+01 1.476000e+00
      vertex 8.020000e+00 -2.499894e+01 1.476000e+00
    endloop
  endfacet
  facet normal -0.000000e+00 -0.000000e+00 -1.000000e+00
    outer loop
      vertex 2.054047e+00 -1.881304e+01 1.476000e+00
      vertex 8.020000e+00 -1.881304e+01 1.476000e+00
      vertex 2.054047e+00 -2.499894e+01 1.476000e+00
    endloop
  endfacet
  facet normal -0.000000e+00 -0.000000e+00 -1.000000e+00
    outer loop
      vertex 3.219961e-01 -3.420905e+01 1.476000e+00
      vertex 2.054047e+00 -2.499894e+01 1.476000e+00
      vertex 2.054047e+00 -3.420905e+01 1.476000e+00
    endloop
  endfacet
  facet normal -0.000000e+00 -0.000000e+00 -1.000000e+00
    outer loop
      vertex 3.219961e-01 -2.499894e+01 1.476000e+00
      vertex 2.054047e+00 -2.499894e+01 1.476000e+00
      vertex 3.219961e-01 -3.420905e+01 1.476000e+00
    endloop
  endfacet
  facet normal -0.000000e+00 -0.000000e+00 -1.000000e+00
    outer loop
      vertex 3.219961e-01 -1.881304e+01 1.476000e+00
      vertex -5.643957e+00 -1.730093e+01 1.476000e+00
      vertex -5.643957e+00 -1.111504e+01 1.476000e+00
    endloop
  endfacet
  facet normal -0.000000e+00 -0.000000e+00 -1.000000e+00
    outer loop
      vertex 3.219961e-01 -1.881304e+01 1.476000e+00
      vertex -5.643957e+00 -2.651105e+01 1.476000e+00
      vertex -5.643957e+00 -1.730093e+01 1.476000e+00
    endloop
  endfacet
  facet normal -0.000000e+00 -0.000000e+00 -1.000000e+00
    outer loop
      vertex 3.219961e-01 -2.499894e+01 1.476000e+00
      vertex -5.643957e+00 -2.651105e+01 1.476000e+00
      vertex 3.219961e-01 -1.881304e+01 1.476000e+00
    endloop
  endfacet
  facet normal -0.000000e+00 -0.000000e+00 -1.000000e+00
    outer loop
      vertex 3.219961e-01 -2.499894e+01 1.476000e+00
      vertex -5.643957e+00 -3.269694e+01 1.476000e+00
      vertex -5.643957e+00 -2.651105e+01 1.476000e+00
    endloop
  endfacet
  facet normal -0.000000e+00 -0.000000e+00 -1.000000e+00
    outer loop
      vertex 3.219961e-01 -3.420905e+01 1.476000e+00
      vertex -5.643957e+00 -3.269694e+01 1.476000e+00
      vertex 3.219961e-01 -2.499894e+01 1.476000e+00
    endloop
  endfacet
  facet normal -0.000000e+00 -0.000000e+00 -1.000000e+00
    outer loop
      vertex 3.219961e-01 2.737498e+01 1.476000e+00
      vertex 2.054047e+00 3.658509e+01 1.476000e+00
      vertex 2.054047e+00 2.737498e+01 1.476000e+00
    endloop
  endfacet
  facet normal -0.000000e+00 -0.000000e+00 -1.000000e+00
    outer loop
      vertex 3.219961e-01 3.658509e+01 1.476000e+00
      vertex 2.054047e+00 3.658509e+01 1.476000e+00
      vertex 3.219961e-01 2.737498e+01 1.476000e+00
    endloop
  endfacet
  facet normal -0.000000e+00 -0.000000e+00 -1.000000e+00
    outer loop
      vertex 1.571800e+01 -4.039494e+01 1.476000e+00
      vertex 1.745005e+01 -4.039494e+01 1.476000e+00
      vertex 3.111401e+01 -4.809295e+01 1.476000e+00
    endloop
  endfacet
  facet normal -0.000000e+00 -0.000000e+00 -1.000000e+00
    outer loop
      vertex -4.586602e+01 -1.904926e+00 1.476000e+00
      vertex -4.413398e+01 -1.904926e+00 1.476000e+00
      vertex -4.586602e+01 -3.417034e+00 1.476000e+00
    endloop
  endfacet
  facet normal -0.000000e+00 -0.000000e+00 -1.000000e+00
    outer loop
      vertex 3.881202e+01 4.280970e+00 1.476000e+00
      vertex 2.514806e+01 -1.904926e+00 1.476000e+00
      vertex 2.514806e+01 4.280970e+00 1.476000e+00
    endloop
  endfacet
  facet normal -0.000000e+00 -0.000000e+00 -1.000000e+00
    outer loop
      vertex 3.881202e+01 -1.904926e+00 1.476000e+00
      vertex 2.514806e+01 -1.904926e+00 1.476000e+00
      vertex 3.881202e+01 4.280970e+00 1.476000e+00
    endloop
  endfacet
  facet normal -0.000000e+00 -0.000000e+00 -1.000000e+00
    outer loop
      vertex 3.284606e+01 -3.269694e+01 1.476000e+00
      vertex 3.881202e+01 -3.420905e+01 1.476000e+00
      vertex 3.881202e+01 -4.039494e+01 1.476000e+00
    endloop
  endfacet
  facet normal -0.000000e+00 -0.000000e+00 -1.000000e+00
    outer loop
      vertex 3.284606e+01 -2.651105e+01 1.476000e+00
      vertex 3.881202e+01 -3.420905e+01 1.476000e+00
      vertex 3.284606e+01 -3.269694e+01 1.476000e+00
    endloop
  endfacet
  facet normal -0.000000e+00 -0.000000e+00 -1.000000e+00
    outer loop
      vertex 3.284606e+01 -2.651105e+01 1.476000e+00
      vertex 4.054406e+01 -3.420905e+01 1.476000e+00
      vertex 3.881202e+01 -3.420905e+01 1.476000e+00
    endloop
  endfacet
  facet normal -0.000000e+00 -0.000000e+00 -1.000000e+00
    outer loop
      vertex 3.284606e+01 -2.499894e+01 1.476000e+00
      vertex 4.054406e+01 -3.420905e+01 1.476000e+00
      vertex 3.284606e+01 -2.651105e+01 1.476000e+00
    endloop
  endfacet
  facet normal -0.000000e+00 -0.000000e+00 -1.000000e+00
    outer loop
      vertex -4.413398e+01 5.793077e+00 1.476000e+00
      vertex -3.047002e+01 1.197897e+01 1.476000e+00
      vertex -3.047002e+01 5.793077e+00 1.476000e+00
    endloop
  endfacet
  facet normal -0.000000e+00 -0.000000e+00 -1.000000e+00
    outer loop
      vertex -4.413398e+01 1.197897e+01 1.476000e+00
      vertex -3.047002e+01 1.197897e+01 1.476000e+00
      vertex -4.413398e+01 5.793077e+00 1.476000e+00
    endloop
  endfacet
  facet normal -0.000000e+00 -0.000000e+00 -1.000000e+00
    outer loop
      vertex -4.413398e+01 1.197897e+01 1.476000e+00
      vertex -3.047002e+01 1.349108e+01 1.476000e+00
      vertex -3.047002e+01 1.197897e+01 1.476000e+00
    endloop
  endfacet
  facet normal -0.000000e+00 -0.000000e+00 -1.000000e+00
    outer loop
      vertex -4.413398e+01 1.349108e+01 1.476000e+00
      vertex -3.047002e+01 1.349108e+01 1.476000e+00
      vertex -4.413398e+01 1.197897e+01 1.476000e+00
    endloop
  endfacet
  facet normal -0.000000e+00 -0.000000e+00 -1.000000e+00
    outer loop
      vertex -4.413398e+01 1.349108e+01 1.476000e+00
      vertex -3.047002e+01 1.967698e+01 1.476000e+00
      vertex -3.047002e+01 1.349108e+01 1.476000e+00
    endloop
  endfacet
  facet normal -0.000000e+00 -0.000000e+00 -1.000000e+00
    outer loop
      vertex -4.413398e+01 1.967698e+01 1.476000e+00
      vertex -3.047002e+01 1.967698e+01 1.476000e+00
      vertex -4.413398e+01 1.349108e+01 1.476000e+00
    endloop
  endfacet
  facet normal -0.000000e+00 -0.000000e+00 -1.000000e+00
    outer loop
      vertex -4.413398e+01 1.967698e+01 1.476000e+00
      vertex -4.413398e+01 2.118908e+01 1.476000e+00
      vertex -3.047002e+01 1.967698e+01 1.476000e+00
    endloop
  endfacet
  facet normal -0.000000e+00 -0.000000e+00 -1.000000e+00
    outer loop
      vertex -4.586602e+01 1.967698e+01 1.476000e+00
      vertex -4.413398e+01 2.118908e+01 1.476000e+00
      vertex -4.413398e+01 1.967698e+01 1.476000e+00
    endloop
  endfacet
  facet normal -0.000000e+00 -0.000000e+00 -1.000000e+00
    outer loop
      vertex -4.586602e+01 1.967698e+01 1.476000e+00
      vertex -4.586602e+01 2.118908e+01 1.476000e+00
      vertex -4.413398e+01 2.118908e+01 1.476000e+00
    endloop
  endfacet
  facet normal -0.000000e+00 -0.000000e+00 -1.000000e+00
    outer loop
      vertex -5.000000e+01 5.000000e+01 1.476000e+00
      vertex -4.586602e+01 2.118908e+01 1.476000e+00
      vertex -4.586602e+01 1.967698e+01 1.476000e+00
    endloop
  endfacet
  facet normal -0.000000e+00 -0.000000e+00 -1.000000e+00
    outer loop
      vertex 3.881202e+01 -1.111504e+01 1.476000e+00
      vertex 3.881202e+01 -9.602930e+00 1.476000e+00
      vertex 4.054406e+01 -9.602930e+00 1.476000e+00
    endloop
  endfacet
  facet normal -0.000000e+00 -0.000000e+00 -1.000000e+00
    outer loop
      vertex 2.514806e+01 -9.602930e+00 1.476000e+00
      vertex 3.881202e+01 -9.602930e+00 1.476000e+00
      vertex 3.881202e+01 -1.111504e+01 1.476000e+00
    endloop
  endfacet
  facet normal -0.000000e+00 -0.000000e+00 -1.000000e+00
    outer loop
      vertex 2.514806e+01 -9.602930e+00 1.476000e+00
      vertex 3.881202e+01 -3.417034e+00 1.476000e+00
      vertex 3.881202e+01 -9.602930e+00 1.476000e+00
    endloop
  endfacet
  facet normal -0.000000e+00 -0.000000e+00 -1.000000e+00
    outer loop
      vertex 2.514806e+01 -3.417034e+00 1.476000e+00
      vertex 3.881202e+01 -3.417034e+00 1.476000e+00
      vertex 2.514806e+01 -9.602930e+00 1.476000e+00
    endloop
  endfacet
  facet normal -0.000000e+00 -0.000000e+00 -1.000000e+00
    outer loop
      vertex 3.284606e+01 2.737498e+01 1.476000e+00
      vertex 3.111401e+01 2.737498e+01 1.476000e+00
      vertex 2.514806e+01 3.507298e+01 1.476000e+00
    endloop
  endfacet
  facet normal -0.000000e+00 -0.000000e+00 -1.000000e+00
    outer loop
      vertex 2.341601e+01 2.888709e+01 1.476000e+00
      vertex 1.745005e+01 1.967698e+01 1.476000e+00
      vertex 9.752050e+00 2.737498e+01 1.476000e+00
    endloop
  endfacet
  facet normal -0.000000e+00 -0.000000e+00 -1.000000e+00
    outer loop
      vertex 2.341601e+01 2.888709e+01 1.476000e+00
      vertex 3.111401e+01 2.118908e+01 1.476000e+00
      vertex 1.745005e+01 1.967698e+01 1.476000e+00
    endloop
  endfacet
  facet normal -0.000000e+00 -0.000000e+00 -1.000000e+00
    outer loop
      vertex 2.514806e+01 2.888709e+01 1.476000e+00
      vertex 3.111401e+01 2.118908e+01 1.476000e+00
      vertex 2.341601e+01 2.888709e+01 1.476000e+00
    endloop
  endfacet
  facet normal -0.000000e+00 -0.000000e+00 -1.000000e+00
    outer loop
      vertex 2.514806e+01 2.888709e+01 1.476000e+00
      vertex 3.111401e+01 2.737498e+01 1.476000e+00
      vertex 3.111401e+01 2.118908e+01 1.476000e+00
    endloop
  endfacet
  facet normal -0.000000e+00 -0.000000e+00 -1.000000e+00
    outer loop
      vertex 2.514806e+01 3.507298e+01 1.476000e+00
      vertex 3.111401e+01 2.737498e+01 1.476000e+00
      vertex 2.514806e+01 2.888709e+01 1.476000e+00
    endloop
  endfacet
  facet normal -0.000000e+00 -0.000000e+00 -1.000000e+00
    outer loop
      vertex 1.745005e+01 -4.039494e+01 1.476000e+00
      vertex 3.111401e+01 -4.190705e+01 1.476000e+00
      vertex 3.111401e+01 -4.809295e+01 1.476000e+00
    endloop
  endfacet
  facet normal -0.000000e+00 -0.000000e+00 -1.000000e+00
    outer loop
      vertex 1.745005e+01 -4.039494e+01 1.476000e+00
      vertex 2.514806e+01 -3.269694e+01 1.476000e+00
      vertex 3.111401e+01 -4.190705e+01 1.476000e+00
    endloop
  endfacet
  facet normal -0.000000e+00 -0.000000e+00 -1.000000e+00
    outer loop
      vertex 2.341601e+01 -3.269694e+01 1.476000e+00
      vertex 2.514806e+01 -3.269694e+01 1.476000e+00
      vertex 1.745005e+01 -4.039494e+01 1.476000e+00
    endloop
  endfacet
  facet normal -0.000000e+00 -0.000000e+00 -1.000000e+00
    outer loop
      vertex 1.745005e+01 -3.420905e+01 1.476000e+00
      vertex 2.341601e+01 -3.269694e+01 1.476000e+00
      vertex 1.745005e+01 -4.039494e+01 1.476000e+00
    endloop
  endfacet
  facet normal -0.000000e+00 -0.000000e+00 -1.000000e+00
    outer loop
      vertex 2.341601e+01 -2.651105e+01 1.476000e+00
      vertex 2.341601e+01 -3.269694e+01 1.476000e+00
      vertex 1.745005e+01 -3.420905e+01 1.476000e+00
    endloop
  endfacet
  facet normal -0.000000e+00 -0.000000e+00 -1.000000e+00
    outer loop
      vertex 1.571800e+01 1.967698e+01 1.476000e+00
      vertex 9.752050e+00 2.737498e+01 1.476000e+00
      vertex 1.745005e+01 1.967698e+01 1.476000e+00
    endloop
  endfacet
  facet normal -0.000000e+00 -0.000000e+00 -1.000000e+00
    outer loop
      vertex 9.752050e+00 2.118908e+01 1.476000e+00
      vertex 9.752050e+00 2.737498e+01 1.476000e+00
      vertex 1.571800e+01 1.967698e+01 1.476000e+00
    endloop
  endfacet
  facet normal -0.000000e+00 -0.000000e+00 -1.000000e+00
    outer loop
      vertex 1.571800e+01 1.349108e+01 1.476000e+00
      vertex 9.752050e+00 2.118908e+01 1.476000e+00
      vertex 1.571800e+01 1.967698e+01 1.476000e+00
    endloop
  endfacet
  facet normal -0.000000e+00 -0.000000e+00 -1.000000e+00
    outer loop
      vertex 8.020000e+00 2.118908e+01 1.476000e+00
      vertex 9.752050e+00 2.118908e+01 1.476000e+00
      vertex 1.571800e+01 1.349108e+01 1.476000e+00
    endloop
  endfacet
  facet normal -0.000000e+00 -0.000000e+00 -1.000000e+00
    outer loop
      vertex 8.020000e+00 -4.039494e+01 1.476000e+00
      vertex 9.752050e+00 -4.039494e+01 1.476000e+00
      vertex -5.643957e+00 -4.809295e+01 1.476000e+00
    endloop
  endfacet
  facet normal -0.000000e+00 -0.000000e+00 -1.000000e+00
    outer loop
      vertex 9.752050e+00 -2.499894e+01 1.476000e+00
      vertex 8.020000e+00 -3.420905e+01 1.476000e+00
      vertex 8.020000e+00 -2.499894e+01 1.476000e+00
    endloop
  endfacet
  facet normal -0.000000e+00 -0.000000e+00 -1.000000e+00
    outer loop
      vertex 9.752050e+00 -3.420905e+01 1.476000e+00
      vertex 8.020000e+00 -3.420905e+01 1.476000e+00
      vertex 9.752050e+00 -2.499894e+01 1.476000e+00
    endloop
  endfacet
  facet normal -0.000000e+00 -0.000000e+00 -1.000000e+00
    outer loop
      vertex 2.054047e+00 2.118908e+01 1.476000e+00
      vertex 3.219961e-01 1.197897e+01 1.476000e+00
      vertex 3.219961e-01 2.118908e+01 1.476000e+00
    endloop
  endfacet
  facet normal -0.000000e+00 -0.000000e+00 -1.000000e+00
    outer loop
      vertex 2.054047e+00 1.197897e+01 1.476000e+00
      vertex 3.219961e-01 1.197897e+01 1.476000e+00
      vertex 2.054047e+00 2.118908e+01 1.476000e+00
    endloop
  endfacet
  facet normal -0.000000e+00 -0.000000e+00 -1.000000e+00
    outer loop
      vertex -5.643957e+00 2.888709e+01 1.476000e+00
      vertex 3.219961e-01 2.737498e+01 1.476000e+00
      vertex 3.219961e-01 2.118908e+01 1.476000e+00
    endloop
  endfacet
  facet normal -0.000000e+00 -0.000000e+00 -1.000000e+00
    outer loop
      vertex -5.643957e+00 2.888709e+01 1.476000e+00
      vertex 3.219961e-01 3.658509e+01 1.476000e+00
      vertex 3.219961e-01 2.737498e+01 1.476000e+00
    endloop
  endfacet
  facet normal -0.000000e+00 -0.000000e+00 -1.000000e+00
    outer loop
      vertex -5.643957e+00 3.507298e+01 1.476000e+00
      vertex 3.219961e-01 3.658509e+01 1.476000e+00
      vertex -5.643957e+00 2.888709e+01 1.476000e+00
    endloop
  endfacet
  facet normal -0.000000e+00 -0.000000e+00 -1.000000e+00
    outer loop
      vertex -5.643957e+00 3.507298e+01 1.476000e+00
      vertex 3.219961e-01 4.277099e+01 1.476000e+00
      vertex 3.219961e-01 3.658509e+01 1.476000e+00
    endloop
  endfacet
  facet normal -0.000000e+00 -0.000000e+00 -1.000000e+00
    outer loop
      vertex -7.376008e+00 3.507298e+01 1.476000e+00
      vertex 3.219961e-01 4.277099e+01 1.476000e+00
      vertex -5.643957e+00 3.507298e+01 1.476000e+00
    endloop
  endfacet
  facet normal -0.000000e+00 -0.000000e+00 -1.000000e+00
    outer loop
      vertex -4.413398e+01 -1.730093e+01 1.476000e+00
      vertex -3.047002e+01 -1.730093e+01 1.476000e+00
      vertex -4.413398e+01 -1.881304e+01 1.476000e+00
    endloop
  endfacet
  facet normal -0.000000e+00 -0.000000e+00 -1.000000e+00
    outer loop
      vertex -4.413398e+01 -1.730093e+01 1.476000e+00
      vertex -3.047002e+01 -1.111504e+01 1.476000e+00
      vertex -3.047002e+01 -1.730093e+01 1.476000e+00
    endloop
  endfacet
  facet normal -0.000000e+00 -0.000000e+00 -1.000000e+00
    outer loop
      vertex -4.413398e+01 -1.111504e+01 1.476000e+00
      vertex -3.047002e+01 -1.111504e+01 1.476000e+00
      vertex -4.413398e+01 -1.730093e+01 1.476000e+00
    endloop
  endfacet
  facet normal -0.000000e+00 -0.000000e+00 -1.000000e+00
    outer loop
      vertex -4.586602e+01 -1.881304e+01 1.476000e+00
      vertex -4.413398e+01 -1.730093e+01 1.476000e+00
      vertex -4.413398e+01 -1.881304e+01 1.476000e+00
    endloop
  endfacet
  facet normal -0.000000e+00 -0.000000e+00 -1.000000e+00
    outer loop
      vertex -4.586602e+01 -1.730093e+01 1.476000e+00
      vertex -4.413398e+01 -1.730093e+01 1.476000e+00
      vertex -4.586602e+01 -1.881304e+01 1.476000e+00
    endloop
  endfacet
  facet normal -0.000000e+00 -0.000000e+00 -1.000000e+00
    outer loop
      vertex -5.000000e+01 -5.000000e+01 1.476000e+00
      vertex -4.586602e+01 -1.881304e+01 1.476000e+00
      vertex -4.586602e+01 -2.499894e+01 1.476000e+00
    endloop
  endfacet
  facet normal -0.000000e+00 -0.000000e+00 -1.000000e+00
    outer loop
      vertex -5.000000e+01 -5.000000e+01 1.476000e+00
      vertex -4.586602e+01 -1.730093e+01 1.476000e+00
      vertex -4.586602e+01 -1.881304e+01 1.476000e+00
    endloop
  endfacet
  facet normal -0.000000e+00 -0.000000e+00 -1.000000e+00
    outer loop
      vertex -4.586602e+01 -1.111504e+01 1.476000e+00
      vertex -4.586602e+01 -1.730093e+01 1.476000e+00
      vertex -5.000000e+01 -5.000000e+01 1.476000e+00
    endloop
  endfacet
  facet normal -0.000000e+00 -0.000000e+00 -1.000000e+00
    outer loop
      vertex -2.103996e+01 -4.809295e+01 1.476000e+00
      vertex -2.103996e+01 -4.190705e+01 1.476000e+00
      vertex -1.507401e+01 -4.190705e+01 1.476000e+00
    endloop
  endfacet
  facet normal -0.000000e+00 -0.000000e+00 -1.000000e+00
    outer loop
      vertex -1.507401e+01 -4.809295e+01 1.476000e+00
      vertex -2.103996e+01 -4.809295e+01 1.476000e+00
      vertex -1.507401e+01 -4.190705e+01 1.476000e+00
    endloop
  endfacet
  facet normal -0.000000e+00 -0.000000e+00 -1.000000e+00
    outer loop
      vertex -5.000000e+01 -5.000000e+01 1.476000e+00
      vertex -2.103996e+01 -4.809295e+01 1.476000e+00
      vertex -1.507401e+01 -4.809295e+01 1.476000e+00
    endloop
  endfacet
  facet normal -0.000000e+00 -0.000000e+00 -1.000000e+00
    outer loop
      vertex -5.000000e+01 -5.000000e+01 1.476000e+00
      vertex -2.277201e+01 -4.809295e+01 1.476000e+00
      vertex -2.103996e+01 -4.809295e+01 1.476000e+00
    endloop
  endfacet
  facet normal -0.000000e+00 -0.000000e+00 -1.000000e+00
    outer loop
      vertex -4.413398e+01 -4.809295e+01 1.476000e+00
      vertex -2.277201e+01 -4.809295e+01 1.476000e+00
      vertex -5.000000e+01 -5.000000e+01 1.476000e+00
    endloop
  endfacet
  facet normal -0.000000e+00 -0.000000e+00 -1.000000e+00
    outer loop
      vertex -1.507401e+01 -4.190705e+01 1.476000e+00
      vertex -1.334196e+01 -3.269694e+01 1.476000e+00
      vertex -1.334196e+01 -4.190705e+01 1.476000e+00
    endloop
  endfacet
  facet normal -0.000000e+00 -0.000000e+00 -1.000000e+00
    outer loop
      vertex -1.507401e+01 -4.190705e+01 1.476000e+00
      vertex -1.507401e+01 -3.269694e+01 1.476000e+00
      vertex -1.334196e+01 -3.269694e+01 1.476000e+00
    endloop
  endfacet
  facet normal -0.000000e+00 -0.000000e+00 -1.000000e+00
    outer loop
      vertex -2.103996e+01 -4.190705e+01 1.476000e+00
      vertex -1.507401e+01 -3.269694e+01 1.476000e+00
      vertex -1.507401e+01 -4.190705e+01 1.476000e+00
    endloop
  endfacet
  facet normal -0.000000e+00 -0.000000e+00 -1.000000e+00
    outer loop
      vertex -2.103996e+01 -4.190705e+01 1.476000e+00
      vertex -2.873797e+01 -3.420905e+01 1.476000e+00
      vertex -1.507401e+01 -3.269694e+01 1.476000e+00
    endloop
  endfacet
  facet normal -0.000000e+00 -0.000000e+00 -1.000000e+00
    outer loop
      vertex -2.277201e+01 -4.190705e+01 1.476000e+00
      vertex -2.873797e+01 -3.420905e+01 1.476000e+00
      vertex -2.103996e+01 -4.190705e+01 1.476000e+00
    endloop
  endfacet
  facet normal -0.000000e+00 -0.000000e+00 -1.000000e+00
    outer loop
      vertex -2.277201e+01 -4.190705e+01 1.476000e+00
      vertex -2.873797e+01 -4.039494e+01 1.476000e+00
      vertex -2.873797e+01 -3.420905e+01 1.476000e+00
    endloop
  endfacet
  facet normal -0.000000e+00 -0.000000e+00 -1.000000e+00
    outer loop
      vertex -2.277201e+01 -4.809295e+01 1.476000e+00
      vertex -2.873797e+01 -4.039494e+01 1.476000e+00
      vertex -2.277201e+01 -4.190705e+01 1.476000e+00
    endloop
  endfacet
  facet normal -0.000000e+00 -0.000000e+00 -1.000000e+00
    outer loop
      vertex -2.277201e+01 -4.809295e+01 1.476000e+00
      vertex -3.047002e+01 -4.039494e+01 1.476000e+00
      vertex -2.873797e+01 -4.039494e+01 1.476000e+00
    endloop
  endfacet
  facet normal -0.000000e+00 -0.000000e+00 -1.000000e+00
    outer loop
      vertex -4.413398e+01 -4.809295e+01 1.476000e+00
      vertex -3.047002e+01 -4.039494e+01 1.476000e+00
      vertex -2.277201e+01 -4.809295e+01 1.476000e+00
    endloop
  endfacet
  facet normal -0.000000e+00 -0.000000e+00 -1.000000e+00
    outer loop
      vertex -1.507401e+01 4.280970e+00 1.476000e+00
      vertex -2.873797e+01 -1.904926e+00 1.476000e+00
      vertex -2.873797e+01 4.280970e+00 1.476000e+00
    endloop
  endfacet
  facet normal -0.000000e+00 -0.000000e+00 -1.000000e+00
    outer loop
      vertex -1.507401e+01 -1.904926e+00 1.476000e+00
      vertex -2.873797e+01 -1.904926e+00 1.476000e+00
      vertex -1.507401e+01 4.280970e+00 1.476000e+00
    endloop
  endfacet
  facet normal -0.000000e+00 -0.000000e+00 -1.000000e+00
    outer loop
      vertex -4.413398e+01 -1.904926e+00 1.476000e+00
      vertex -3.047002e+01 4.280970e+00 1.476000e+00
      vertex -3.047002e+01 -1.904926e+00 1.476000e+00
    endloop
  endfacet
  facet normal -0.000000e+00 -0.000000e+00 -1.000000e+00
    outer loop
      vertex -4.413398e+01 4.280970e+00 1.476000e+00
      vertex -3.047002e+01 4.280970e+00 1.476000e+00
      vertex -4.413398e+01 -1.904926e+00 1.476000e+00
    endloop
  endfacet
  facet normal -0.000000e+00 -0.000000e+00 -1.000000e+00
    outer loop
      vertex -1.334196e+01 4.280970e+00 1.476000e+00
      vertex -1.334196e+01 5.793077e+00 1.476000e+00
      vertex 3.219961e-01 5.793077e+00 1.476000e+00
    endloop
  endfacet
  facet normal -0.000000e+00 -0.000000e+00 -1.000000e+00
    outer loop
      vertex -1.507401e+01 4.280970e+00 1.476000e+00
      vertex -1.334196e+01 5.793077e+00 1.476000e+00
      vertex -1.334196e+01 4.280970e+00 1.476000e+00
    endloop
  endfacet
  facet normal -0.000000e+00 -0.000000e+00 -1.000000e+00
    outer loop
      vertex -1.507401e+01 4.280970e+00 1.476000e+00
      vertex -1.507401e+01 5.793077e+00 1.476000e+00
      vertex -1.334196e+01 5.793077e+00 1.476000e+00
    endloop
  endfacet
  facet normal -0.000000e+00 -0.000000e+00 -1.000000e+00
    outer loop
      vertex -2.873797e+01 4.280970e+00 1.476000e+00
      vertex -1.507401e+01 5.793077e+00 1.476000e+00
      vertex -1.507401e+01 4.280970e+00 1.476000e+00
    endloop
  endfacet
  facet normal -0.000000e+00 -0.000000e+00 -1.000000e+00
    outer loop
      vertex -2.873797e+01 4.280970e+00 1.476000e+00
      vertex -2.873797e+01 5.793077e+00 1.476000e+00
      vertex -1.507401e+01 5.793077e+00 1.476000e+00
    endloop
  endfacet
  facet normal -0.000000e+00 -0.000000e+00 -1.000000e+00
    outer loop
      vertex -3.047002e+01 4.280970e+00 1.476000e+00
      vertex -2.873797e+01 5.793077e+00 1.476000e+00
      vertex -2.873797e+01 4.280970e+00 1.476000e+00
    endloop
  endfacet
  facet normal -0.000000e+00 -0.000000e+00 -1.000000e+00
    outer loop
      vertex -3.047002e+01 4.280970e+00 1.476000e+00
      vertex -3.047002e+01 5.793077e+00 1.476000e+00
      vertex -2.873797e+01 5.793077e+00 1.476000e+00
    endloop
  endfacet
  facet normal -0.000000e+00 -0.000000e+00 -1.000000e+00
    outer loop
      vertex -4.413398e+01 4.280970e+00 1.476000e+00
      vertex -3.047002e+01 5.793077e+00 1.476000e+00
      vertex -3.047002e+01 4.280970e+00 1.476000e+00
    endloop
  endfacet
  facet normal -0.000000e+00 -0.000000e+00 -1.000000e+00
    outer loop
      vertex -4.413398e+01 4.280970e+00 1.476000e+00
      vertex -4.413398e+01 5.793077e+00 1.476000e+00
      vertex -3.047002e+01 5.793077e+00 1.476000e+00
    endloop
  endfacet
  facet normal -0.000000e+00 -0.000000e+00 -1.000000e+00
    outer loop
      vertex -4.586602e+01 4.280970e+00 1.476000e+00
      vertex -4.413398e+01 5.793077e+00 1.476000e+00
      vertex -4.413398e+01 4.280970e+00 1.476000e+00
    endloop
  endfacet
  facet normal -0.000000e+00 -0.000000e+00 -1.000000e+00
    outer loop
      vertex -3.816802e+01 -3.269694e+01 1.476000e+00
      vertex -4.413398e+01 -4.190705e+01 1.476000e+00
      vertex -4.586602e+01 -4.190705e+01 1.476000e+00
    endloop
  endfacet
  facet normal -0.000000e+00 -0.000000e+00 -1.000000e+00
    outer loop
      vertex -3.816802e+01 -3.269694e+01 1.476000e+00
      vertex -3.047002e+01 -4.039494e+01 1.476000e+00
      vertex -4.413398e+01 -4.190705e+01 1.476000e+00
    endloop
  endfacet
  facet normal -0.000000e+00 -0.000000e+00 -1.000000e+00
    outer loop
      vertex -3.643597e+01 -3.269694e+01 1.476000e+00
      vertex -3.047002e+01 -4.039494e+01 1.476000e+00
      vertex -3.816802e+01 -3.269694e+01 1.476000e+00
    endloop
  endfacet
  facet normal -0.000000e+00 -0.000000e+00 -1.000000e+00
    outer loop
      vertex -3.643597e+01 -3.269694e+01 1.476000e+00
      vertex -3.047002e+01 -3.420905e+01 1.476000e+00
      vertex -3.047002e+01 -4.039494e+01 1.476000e+00
    endloop
  endfacet
  facet normal -0.000000e+00 -0.000000e+00 -1.000000e+00
    outer loop
      vertex -3.643597e+01 -2.651105e+01 1.476000e+00
      vertex -3.047002e+01 -3.420905e+01 1.476000e+00
      vertex -3.643597e+01 -3.269694e+01 1.476000e+00
    endloop
  endfacet
  facet normal -0.000000e+00 -0.000000e+00 -1.000000e+00
    outer loop
      vertex -3.643597e+01 -2.651105e+01 1.476000e+00
      vertex -2.873797e+01 -3.420905e+01 1.476000e+00
      vertex -3.047002e+01 -3.420905e+01 1.476000e+00
    endloop
  endfacet
  facet normal -0.000000e+00 -0.000000e+00 -1.000000e+00
    outer loop
      vertex -2.277201e+01 -2.499894e+01 1.476000e+00
      vertex -2.873797e+01 -3.420905e+01 1.476000e+00
      vertex -3.643597e+01 -2.651105e+01 1.476000e+00
    endloop
  endfacet
  facet normal -0.000000e+00 -0.000000e+00 -1.000000e+00
    outer loop
      vertex -2.277201e+01 -2.499894e+01 1.476000e+00
      vertex -1.507401e+01 -3.269694e+01 1.476000e+00
      vertex -2.873797e+01 -3.420905e+01 1.476000e+00
    endloop
  endfacet
  facet normal -0.000000e+00 -0.000000e+00 -1.000000e+00
    outer loop
      vertex -2.103996e+01 -2.499894e+01 1.476000e+00
      vertex -1.507401e+01 -3.269694e+01 1.476000e+00
      vertex -2.277201e+01 -2.499894e+01 1.476000e+00
    endloop
  endfacet
  facet normal -0.000000e+00 -0.000000e+00 -1.000000e+00
    outer loop
      vertex -2.103996e+01 -2.499894e+01 1.476000e+00
      vertex -1.507401e+01 -2.651105e+01 1.476000e+00
      vertex -1.507401e+01 -3.269694e+01 1.476000e+00
    endloop
  endfacet
  facet normal -0.000000e+00 -0.000000e+00 -1.000000e+00
    outer loop
      vertex -2.103996e+01 -1.881304e+01 1.476000e+00
      vertex -1.507401e+01 -2.651105e+01 1.476000e+00
      vertex -2.103996e+01 -2.499894e+01 1.476000e+00
    endloop
  endfacet
  facet normal -0.000000e+00 -0.000000e+00 -1.000000e+00
    outer loop
      vertex -2.277201e+01 -1.881304e+01 1.476000e+00
      vertex -2.873797e+01 -1.111504e+01 1.476000e+00
      vertex -2.103996e+01 -1.881304e+01 1.476000e+00
    endloop
  endfacet
  facet normal -0.000000e+00 -0.000000e+00 -1.000000e+00
    outer loop
      vertex -2.277201e+01 -1.881304e+01 1.476000e+00
      vertex -2.873797e+01 -1.730093e+01 1.476000e+00
      vertex -2.873797e+01 -1.111504e+01 1.476000e+00
    endloop
  endfacet
  facet normal -0.000000e+00 -0.000000e+00 -1.000000e+00
    outer loop
      vertex -2.277201e+01 -2.499894e+01 1.476000e+00
      vertex -2.873797e+01 -1.730093e+01 1.476000e+00
      vertex -2.277201e+01 -1.881304e+01 1.476000e+00
    endloop
  endfacet
  facet normal -0.000000e+00 -0.000000e+00 -1.000000e+00
    outer loop
      vertex -2.277201e+01 -2.499894e+01 1.476000e+00
      vertex -3.047002e+01 -1.730093e+01 1.476000e+00
      vertex -2.873797e+01 -1.730093e+01 1.476000e+00
    endloop
  endfacet
  facet normal -0.000000e+00 -0.000000e+00 -1.000000e+00
    outer loop
      vertex -3.643597e+01 -2.651105e+01 1.476000e+00
      vertex -3.047002e+01 -1.730093e+01 1.476000e+00
      vertex -2.277201e+01 -2.499894e+01 1.476000e+00
    endloop
  endfacet
  facet normal -0.000000e+00 -0.000000e+00 -1.000000e+00
    outer loop
      vertex -3.643597e+01 -2.651105e+01 1.476000e+00
      vertex -4.413398e+01 -1.881304e+01 1.476000e+00
      vertex -3.047002e+01 -1.730093e+01 1.476000e+00
    endloop
  endfacet
  facet normal -0.000000e+00 -0.000000e+00 -1.000000e+00
    outer loop
      vertex -3.816802e+01 -2.651105e+01 1.476000e+00
      vertex -4.413398e+01 -1.881304e+01 1.476000e+00
      vertex -3.643597e+01 -2.651105e+01 1.476000e+00
    endloop
  endfacet
  facet normal -0.000000e+00 -0.000000e+00 -1.000000e+00
    outer loop
      vertex -3.816802e+01 -2.651105e+01 1.476000e+00
      vertex -4.413398e+01 -2.499894e+01 1.476000e+00
      vertex -4.413398e+01 -1.881304e+01 1.476000e+00
    endloop
  endfacet
  facet normal -0.000000e+00 -0.000000e+00 -1.000000e+00
    outer loop
      vertex -3.816802e+01 -3.269694e+01 1.476000e+00
      vertex -4.413398e+01 -2.499894e+01 1.476000e+00
      vertex -3.816802e+01 -2.651105e+01 1.476000e+00
    endloop
  endfacet
  facet normal -0.000000e+00 -0.000000e+00 -1.000000e+00
    outer loop
      vertex -3.816802e+01 -3.269694e+01 1.476000e+00
      vertex -4.586602e+01 -2.499894e+01 1.476000e+00
      vertex -4.413398e+01 -2.499894e+01 1.476000e+00
    endloop
  endfacet
  facet normal -0.000000e+00 -0.000000e+00 -1.000000e+00
    outer loop
      vertex -4.586602e+01 -4.190705e+01 1.476000e+00
      vertex -4.586602e+01 -2.499894e+01 1.476000e+00
      vertex -3.816802e+01 -3.269694e+01 1.476000e+00
    endloop
  endfacet
  facet normal -0.000000e+00 -0.000000e+00 -1.000000e+00
    outer loop
      vertex -4.586602e+01 -4.190705e+01 1.476000e+00
      vertex -5.000000e+01 -5.000000e+01 1.476000e+00
      vertex -4.586602e+01 -2.499894e+01 1.476000e+00
    endloop
  endfacet
  facet normal -0.000000e+00 -0.000000e+00 -1.000000e+00
    outer loop
      vertex -4.586602e+01 -4.809295e+01 1.476000e+00
      vertex -5.000000e+01 -5.000000e+01 1.476000e+00
      vertex -4.586602e+01 -4.190705e+01 1.476000e+00
    endloop
  endfacet
  facet normal -0.000000e+00 -0.000000e+00 -1.000000e+00
    outer loop
      vertex -3.047002e+01 4.277099e+01 1.476000e+00
      vertex -3.047002e+01 3.658509e+01 1.476000e+00
      vertex -3.643597e+01 3.507298e+01 1.476000e+00
    endloop
  endfacet
  facet normal -0.000000e+00 -0.000000e+00 -1.000000e+00
    outer loop
      vertex -2.873797e+01 3.658509e+01 1.476000e+00
      vertex -2.277201e+01 4.277099e+01 1.476000e+00
      vertex -2.277201e+01 3.658509e+01 1.476000e+00
    endloop
  endfacet
  facet normal -0.000000e+00 -0.000000e+00 -1.000000e+00
    outer loop
      vertex -2.873797e+01 4.277099e+01 1.476000e+00
      vertex -2.277201e+01 4.277099e+01 1.476000e+00
      vertex -2.873797e+01 3.658509e+01 1.476000e+00
    endloop
  endfacet
  facet normal -0.000000e+00 -0.000000e+00 -1.000000e+00
    outer loop
      vertex -2.873797e+01 4.277099e+01 1.476000e+00
      vertex -5.000000e+01 5.000000e+01 1.476000e+00
      vertex -2.277201e+01 4.277099e+01 1.476000e+00
    endloop
  endfacet
  facet normal -0.000000e+00 -0.000000e+00 -1.000000e+00
    outer loop
      vertex -3.047002e+01 4.277099e+01 1.476000e+00
      vertex -5.000000e+01 5.000000e+01 1.476000e+00
      vertex -2.873797e+01 4.277099e+01 1.476000e+00
    endloop
  endfacet
  facet normal -0.000000e+00 -0.000000e+00 -1.000000e+00
    outer loop
      vertex -2.103996e+01 2.118908e+01 1.476000e+00
      vertex -1.334196e+01 2.888709e+01 1.476000e+00
      vertex -7.376008e+00 1.967698e+01 1.476000e+00
    endloop
  endfacet
  facet normal -0.000000e+00 -0.000000e+00 -1.000000e+00
    outer loop
      vertex -2.103996e+01 2.118908e+01 1.476000e+00
      vertex -1.507401e+01 2.888709e+01 1.476000e+00
      vertex -1.334196e+01 2.888709e+01 1.476000e+00
    endloop
  endfacet
  facet normal -0.000000e+00 -0.000000e+00 -1.000000e+00
    outer loop
      vertex -2.103996e+01 2.737498e+01 1.476000e+00
      vertex -1.507401e+01 2.888709e+01 1.476000e+00
      vertex -2.103996e+01 2.118908e+01 1.476000e+00
    endloop
  endfacet
  facet normal -0.000000e+00 -0.000000e+00 -1.000000e+00
    outer loop
      vertex -1.507401e+01 3.507298e+01 1.476000e+00
      vertex -2.103996e+01 4.277099e+01 1.476000e+00
      vertex -1.334196e+01 3.507298e+01 1.476000e+00
    endloop
  endfacet
  facet normal -0.000000e+00 -0.000000e+00 -1.000000e+00
    outer loop
      vertex -1.507401e+01 3.507298e+01 1.476000e+00
      vertex -2.103996e+01 3.658509e+01 1.476000e+00
      vertex -2.103996e+01 4.277099e+01 1.476000e+00
    endloop
  endfacet
  facet normal -0.000000e+00 -0.000000e+00 -1.000000e+00
    outer loop
      vertex -2.103996e+01 2.737498e+01 1.476000e+00
      vertex -2.103996e+01 3.658509e+01 1.476000e+00
      vertex -1.507401e+01 3.507298e+01 1.476000e+00
    endloop
  endfacet
  facet normal -0.000000e+00 -0.000000e+00 -1.000000e+00
    outer loop
      vertex -2.103996e+01 2.737498e+01 1.476000e+00
      vertex -2.277201e+01 3.658509e+01 1.476000e+00
      vertex -2.103996e+01 3.658509e+01 1.476000e+00
    endloop
  endfacet
  facet normal -0.000000e+00 -0.000000e+00 -1.000000e+00
    outer loop
      vertex -2.277201e+01 2.737498e+01 1.476000e+00
      vertex -2.277201e+01 3.658509e+01 1.476000e+00
      vertex -2.103996e+01 2.737498e+01 1.476000e+00
    endloop
  endfacet
  facet normal -0.000000e+00 -0.000000e+00 -1.000000e+00
    outer loop
      vertex -2.277201e+01 2.737498e+01 1.476000e+00
      vertex -2.873797e+01 3.658509e+01 1.476000e+00
      vertex -2.277201e+01 3.658509e+01 1.476000e+00
    endloop
  endfacet
  facet normal -0.000000e+00 -0.000000e+00 -1.000000e+00
    outer loop
      vertex -3.643597e+01 2.888709e+01 1.476000e+00
      vertex -2.873797e+01 3.658509e+01 1.476000e+00
      vertex -2.277201e+01 2.737498e+01 1.476000e+00
    endloop
  endfacet
  facet normal -0.000000e+00 -0.000000e+00 -1.000000e+00
    outer loop
      vertex -3.643597e+01 2.888709e+01 1.476000e+00
      vertex -3.047002e+01 3.658509e+01 1.476000e+00
      vertex -2.873797e+01 3.658509e+01 1.476000e+00
    endloop
  endfacet
  facet normal -0.000000e+00 -0.000000e+00 -1.000000e+00
    outer loop
      vertex -3.643597e+01 3.507298e+01 1.476000e+00
      vertex -3.047002e+01 3.658509e+01 1.476000e+00
      vertex -3.643597e+01 2.888709e+01 1.476000e+00
    endloop
  endfacet
  facet normal -0.000000e+00 -0.000000e+00 -1.000000e+00
    outer loop
      vertex -7.376008e+00 -1.730093e+01 1.476000e+00
      vertex -1.334196e+01 -9.602930e+00 1.476000e+00
      vertex -7.376008e+00 -1.111504e+01 1.476000e+00
    endloop
  endfacet
  facet normal -0.000000e+00 -0.000000e+00 -1.000000e+00
    outer loop
      vertex -1.507401e+01 -9.602930e+00 1.476000e+00
      vertex -1.334196e+01 -9.602930e+00 1.476000e+00
      vertex -7.376008e+00 -1.730093e+01 1.476000e+00
    endloop
  endfacet
  facet normal -0.000000e+00 -0.000000e+00 -1.000000e+00
    outer loop
      vertex -2.873797e+01 -9.602930e+00 1.476000e+00
      vertex -1.507401e+01 -3.417034e+00 1.476000e+00
      vertex -1.507401e+01 -9.602930e+00 1.476000e+00
    endloop
  endfacet
  facet normal -0.000000e+00 -0.000000e+00 -1.000000e+00
    outer loop
      vertex -2.873797e+01 -3.417034e+00 1.476000e+00
      vertex -1.507401e+01 -3.417034e+00 1.476000e+00
      vertex -2.873797e+01 -9.602930e+00 1.476000e+00
    endloop
  endfacet
  facet normal -0.000000e+00 -0.000000e+00 -1.000000e+00
    outer loop
      vertex 8.020000e+00 -4.039494e+01 1.476000e+00
      vertex 2.054047e+00 -4.039494e+01 1.476000e+00
      vertex 8.020000e+00 -3.420905e+01 1.476000e+00
    endloop
  endfacet
  facet normal -0.000000e+00 -0.000000e+00 -1.000000e+00
    outer loop
      vertex -5.643957e+00 -4.809295e+01 1.476000e+00
      vertex 2.054047e+00 -4.039494e+01 1.476000e+00
      vertex 8.020000e+00 -4.039494e+01 1.476000e+00
    endloop
  endfacet
  facet normal -0.000000e+00 -0.000000e+00 -1.000000e+00
    outer loop
      vertex -5.643957e+00 -4.809295e+01 1.476000e+00
      vertex 3.219961e-01 -4.039494e+01 1.476000e+00
      vertex 2.054047e+00 -4.039494e+01 1.476000e+00
    endloop
  endfacet
  facet normal -0.000000e+00 -0.000000e+00 -1.000000e+00
    outer loop
      vertex -5.643957e+00 -4.190705e+01 1.476000e+00
      vertex 3.219961e-01 -4.039494e+01 1.476000e+00
      vertex -5.643957e+00 -4.809295e+01 1.476000e+00
    endloop
  endfacet
  facet normal -0.000000e+00 -0.000000e+00 -1.000000e+00
    outer loop
      vertex -5.643957e+00 -4.190705e+01 1.476000e+00
      vertex 3.219961e-01 -3.420905e+01 1.476000e+00
      vertex 3.219961e-01 -4.039494e+01 1.476000e+00
    endloop
  endfacet
  facet normal -0.000000e+00 -0.000000e+00 -1.000000e+00
    outer loop
      vertex -5.643957e+00 -4.190705e+01 1.476000e+00
      vertex -5.643957e+00 -3.269694e+01 1.476000e+00
      vertex 3.219961e-01 -3.420905e+01 1.476000e+00
    endloop
  endfacet
  facet normal -0.000000e+00 -0.000000e+00 -1.000000e+00
    outer loop
      vertex -7.376008e+00 -4.190705e+01 1.476000e+00
      vertex -5.643957e+00 -3.269694e+01 1.476000e+00
      vertex -5.643957e+00 -4.190705e+01 1.476000e+00
    endloop
  endfacet
  facet normal -0.000000e+00 -0.000000e+00 -1.000000e+00
    outer loop
      vertex -3.816802e+01 2.888709e+01 1.476000e+00
      vertex -4.413398e+01 2.737498e+01 1.476000e+00
      vertex -3.816802e+01 3.507298e+01 1.476000e+00
    endloop
  endfacet
  facet normal -0.000000e+00 -0.000000e+00 -1.000000e+00
    outer loop
      vertex -3.816802e+01 2.888709e+01 1.476000e+00
      vertex -4.413398e+01 2.118908e+01 1.476000e+00
      vertex -4.413398e+01 2.737498e+01 1.476000e+00
    endloop
  endfacet
  facet normal -0.000000e+00 -0.000000e+00 -1.000000e+00
    outer loop
      vertex -3.643597e+01 2.888709e+01 1.476000e+00
      vertex -4.413398e+01 2.118908e+01 1.476000e+00
      vertex -3.816802e+01 2.888709e+01 1.476000e+00
    endloop
  endfacet
  facet normal -0.000000e+00 -0.000000e+00 -1.000000e+00
    outer loop
      vertex -3.643597e+01 2.888709e+01 1.476000e+00
      vertex -3.047002e+01 1.967698e+01 1.476000e+00
      vertex -4.413398e+01 2.118908e+01 1.476000e+00
    endloop
  endfacet
  facet normal -0.000000e+00 -0.000000e+00 -1.000000e+00
    outer loop
      vertex -2.277201e+01 2.737498e+01 1.476000e+00
      vertex -3.047002e+01 1.967698e+01 1.476000e+00
      vertex -3.643597e+01 2.888709e+01 1.476000e+00
    endloop
  endfacet
  facet normal -0.000000e+00 -0.000000e+00 -1.000000e+00
    outer loop
      vertex -2.277201e+01 2.737498e+01 1.476000e+00
      vertex -2.873797e+01 1.967698e+01 1.476000e+00
      vertex -3.047002e+01 1.967698e+01 1.476000e+00
    endloop
  endfacet
  facet normal -0.000000e+00 -0.000000e+00 -1.000000e+00
    outer loop
      vertex -2.277201e+01 2.118908e+01 1.476000e+00
      vertex -2.873797e+01 1.967698e+01 1.476000e+00
      vertex -2.277201e+01 2.737498e+01 1.476000e+00
    endloop
  endfacet
  facet normal -0.000000e+00 -0.000000e+00 -1.000000e+00
    outer loop
      vertex -2.277201e+01 2.118908e+01 1.476000e+00
      vertex -2.873797e+01 1.349108e+01 1.476000e+00
      vertex -2.873797e+01 1.967698e+01 1.476000e+00
    endloop
  endfacet
  facet normal -0.000000e+00 -0.000000e+00 -1.000000e+00
    outer loop
      vertex -2.103996e+01 2.118908e+01 1.476000e+00
      vertex -2.873797e+01 1.349108e+01 1.476000e+00
      vertex -2.277201e+01 2.118908e+01 1.476000e+00
    endloop
  endfacet
  facet normal -0.000000e+00 -0.000000e+00 -1.000000e+00
    outer loop
      vertex -2.103996e+01 2.118908e+01 1.476000e+00
      vertex -1.507401e+01 1.197897e+01 1.476000e+00
      vertex -2.873797e+01 1.349108e+01 1.476000e+00
    endloop
  endfacet
  facet normal -0.000000e+00 -0.000000e+00 -1.000000e+00
    outer loop
      vertex -7.376008e+00 1.967698e+01 1.476000e+00
      vertex -1.507401e+01 1.197897e+01 1.476000e+00
      vertex -2.103996e+01 2.118908e+01 1.476000e+00
    endloop
  endfacet
  facet normal -0.000000e+00 -0.000000e+00 -1.000000e+00
    outer loop
      vertex -7.376008e+00 1.967698e+01 1.476000e+00
      vertex -1.334196e+01 1.197897e+01 1.476000e+00
      vertex -1.507401e+01 1.197897e+01 1.476000e+00
    endloop
  endfacet
  facet normal -0.000000e+00 -0.000000e+00 -1.000000e+00
    outer loop
      vertex -7.376008e+00 1.349108e+01 1.476000e+00
      vertex -1.334196e+01 1.197897e+01 1.476000e+00
      vertex -7.376008e+00 1.967698e+01 1.476000e+00
    endloop
  endfacet
  facet normal -0.000000e+00 -0.000000e+00 -1.000000e+00
    outer loop
      vertex -7.376008e+00 1.349108e+01 1.476000e+00
      vertex -1.334196e+01 5.793077e+00 1.476000e+00
      vertex -1.334196e+01 1.197897e+01 1.476000e+00
    endloop
  endfacet
  facet normal -0.000000e+00 -0.000000e+00 -1.000000e+00
    outer loop
      vertex -5.643957e+00 1.349108e+01 1.476000e+00
      vertex -1.334196e+01 5.793077e+00 1.476000e+00
      vertex -7.376008e+00 1.349108e+01 1.476000e+00
    endloop
  endfacet
  facet normal -0.000000e+00 -0.000000e+00 -1.000000e+00
    outer loop
      vertex -5.643957e+00 1.349108e+01 1.476000e+00
      vertex 3.219961e-01 1.197897e+01 1.476000e+00
      vertex 3.219961e-01 5.793077e+00 1.476000e+00
    endloop
  endfacet
  facet normal -0.000000e+00 -0.000000e+00 -1.000000e+00
    outer loop
      vertex -5.643957e+00 1.349108e+01 1.476000e+00
      vertex 3.219961e-01 2.118908e+01 1.476000e+00
      vertex 3.219961e-01 1.197897e+01 1.476000e+00
    endloop
  endfacet
  facet normal -0.000000e+00 -0.000000e+00 -1.000000e+00
    outer loop
      vertex -5.643957e+00 1.967698e+01 1.476000e+00
      vertex 3.219961e-01 2.118908e+01 1.476000e+00
      vertex -5.643957e+00 1.349108e+01 1.476000e+00
    endloop
  endfacet
  facet normal -0.000000e+00 -0.000000e+00 -1.000000e+00
    outer loop
      vertex -5.643957e+00 1.967698e+01 1.476000e+00
      vertex -5.643957e+00 2.888709e+01 1.476000e+00
      vertex 3.219961e-01 2.118908e+01 1.476000e+00
    endloop
  endfacet
  facet normal -0.000000e+00 -0.000000e+00 -1.000000e+00
    outer loop
      vertex -7.376008e+00 1.967698e+01 1.476000e+00
      vertex -5.643957e+00 2.888709e+01 1.476000e+00
      vertex -5.643957e+00 1.967698e+01 1.476000e+00
    endloop
  endfacet
  facet normal -0.000000e+00 -0.000000e+00 -1.000000e+00
    outer loop
      vertex -7.376008e+00 1.967698e+01 1.476000e+00
      vertex -7.376008e+00 2.888709e+01 1.476000e+00
      vertex -5.643957e+00 2.888709e+01 1.476000e+00
    endloop
  endfacet
  facet normal -0.000000e+00 -0.000000e+00 -1.000000e+00
    outer loop
      vertex -1.334196e+01 2.888709e+01 1.476000e+00
      vertex -7.376008e+00 2.888709e+01 1.476000e+00
      vertex -7.376008e+00 1.967698e+01 1.476000e+00
    endloop
  endfacet
  facet normal -0.000000e+00 -0.000000e+00 -1.000000e+00
    outer loop
      vertex -1.334196e+01 2.888709e+01 1.476000e+00
      vertex -7.376008e+00 3.507298e+01 1.476000e+00
      vertex -7.376008e+00 2.888709e+01 1.476000e+00
    endloop
  endfacet
  facet normal -0.000000e+00 -0.000000e+00 -1.000000e+00
    outer loop
      vertex -1.334196e+01 3.507298e+01 1.476000e+00
      vertex -7.376008e+00 3.507298e+01 1.476000e+00
      vertex -1.334196e+01 2.888709e+01 1.476000e+00
    endloop
  endfacet
  facet normal -0.000000e+00 -0.000000e+00 -1.000000e+00
    outer loop
      vertex -1.334196e+01 3.507298e+01 1.476000e+00
      vertex 3.219961e-01 4.277099e+01 1.476000e+00
      vertex -7.376008e+00 3.507298e+01 1.476000e+00
    endloop
  endfacet
  facet normal -0.000000e+00 -0.000000e+00 -1.000000e+00
    outer loop
      vertex -2.103996e+01 4.277099e+01 1.476000e+00
      vertex 3.219961e-01 4.277099e+01 1.476000e+00
      vertex -1.334196e+01 3.507298e+01 1.476000e+00
    endloop
  endfacet
  facet normal -0.000000e+00 -0.000000e+00 -1.000000e+00
    outer loop
      vertex 8.020000e+00 -3.417034e+00 1.476000e+00
      vertex 2.054047e+00 -9.602930e+00 1.476000e+00
      vertex 2.054047e+00 -3.417034e+00 1.476000e+00
    endloop
  endfacet
  facet normal -0.000000e+00 -0.000000e+00 -1.000000e+00
    outer loop
      vertex 8.020000e+00 -9.602930e+00 1.476000e+00
      vertex 2.054047e+00 -9.602930e+00 1.476000e+00
      vertex 8.020000e+00 -3.417034e+00 1.476000e+00
    endloop
  endfacet
  facet normal -0.000000e+00 -0.000000e+00 -1.000000e+00
    outer loop
      vertex 8.020000e+00 -1.881304e+01 1.476000e+00
      vertex 9.752050e+00 -9.602930e+00 1.476000e+00
      vertex 9.752050e+00 -1.881304e+01 1.476000e+00
    endloop
  endfacet
  facet normal -0.000000e+00 -0.000000e+00 -1.000000e+00
    outer loop
      vertex 8.020000e+00 -1.881304e+01 1.476000e+00
      vertex 8.020000e+00 -9.602930e+00 1.476000e+00
      vertex 9.752050e+00 -9.602930e+00 1.476000e+00
    endloop
  endfacet
  facet normal -0.000000e+00 -0.000000e+00 -1.000000e+00
    outer loop
      vertex 2.054047e+00 -1.881304e+01 1.476000e+00
      vertex 8.020000e+00 -9.602930e+00 1.476000e+00
      vertex 8.020000e+00 -1.881304e+01 1.476000e+00
    endloop
  endfacet
  facet normal -0.000000e+00 -0.000000e+00 -1.000000e+00
    outer loop
      vertex 2.054047e+00 -1.881304e+01 1.476000e+00
      vertex 2.054047e+00 -9.602930e+00 1.476000e+00
      vertex 8.020000e+00 -9.602930e+00 1.476000e+00
    endloop
  endfacet
  facet normal -0.000000e+00 -0.000000e+00 -1.000000e+00
    outer loop
      vertex 3.219961e-01 -9.602930e+00 1.476000e+00
      vertex 2.054047e+00 -9.602930e+00 1.476000e+00
      vertex 2.054047e+00 -1.881304e+01 1.476000e+00
    endloop
  endfacet
  facet normal -0.000000e+00 -0.000000e+00 -1.000000e+00
    outer loop
      vertex -1.334196e+01 -3.417034e+00 1.476000e+00
      vertex -7.376008e+00 -1.111504e+01 1.476000e+00
      vertex -1.334196e+01 -9.602930e+00 1.476000e+00
    endloop
  endfacet
  facet normal -0.000000e+00 -0.000000e+00 -1.000000e+00
    outer loop
      vertex 3.219961e-01 -3.417034e+00 1.476000e+00
      vertex -7.376008e+00 -1.111504e+01 1.476000e+00
      vertex -1.334196e+01 -3.417034e+00 1.476000e+00
    endloop
  endfacet
  facet normal -0.000000e+00 -0.000000e+00 -1.000000e+00
    outer loop
      vertex 3.219961e-01 -3.417034e+00 1.476000e+00
      vertex -5.643957e+00 -1.111504e+01 1.476000e+00
      vertex -7.376008e+00 -1.111504e+01 1.476000e+00
    endloop
  endfacet
  facet normal -0.000000e+00 -0.000000e+00 -1.000000e+00
    outer loop
      vertex 3.219961e-01 -9.602930e+00 1.476000e+00
      vertex -5.643957e+00 -1.111504e+01 1.476000e+00
      vertex 3.219961e-01 -3.417034e+00 1.476000e+00
    endloop
  endfacet
  facet normal -0.000000e+00 -0.000000e+00 -1.000000e+00
    outer loop
      vertex 3.219961e-01 -9.602930e+00 1.476000e+00
      vertex 3.219961e-01 -1.881304e+01 1.476000e+00
      vertex -5.643957e+00 -1.111504e+01 1.476000e+00
    endloop
  endfacet
  facet normal -0.000000e+00 -0.000000e+00 -1.000000e+00
    outer loop
      vertex 2.054047e+00 -1.881304e+01 1.476000e+00
      vertex 3.219961e-01 -1.881304e+01 1.476000e+00
      vertex 3.219961e-01 -9.602930e+00 1.476000e+00
    endloop
  endfacet
  facet normal -0.000000e+00 -0.000000e+00 -1.000000e+00
    outer loop
      vertex -3.047002e+01 -3.417034e+00 1.476000e+00
      vertex -4.413398e+01 -9.602930e+00 1.476000e+00
      vertex -4.413398e+01 -3.417034e+00 1.476000e+00
    endloop
  endfacet
  facet normal -0.000000e+00 -0.000000e+00 -1.000000e+00
    outer loop
      vertex -3.047002e+01 -9.602930e+00 1.476000e+00
      vertex -4.413398e+01 -9.602930e+00 1.476000e+00
      vertex -3.047002e+01 -3.417034e+00 1.476000e+00
    endloop
  endfacet
  facet normal -0.000000e+00 -0.000000e+00 -1.000000e+00
    outer loop
      vertex -1.507401e+01 -3.417034e+00 1.476000e+00
      vertex -1.334196e+01 -1.904926e+00 1.476000e+00
      vertex -1.334196e+01 -3.417034e+00 1.476000e+00
    endloop
  endfacet
  facet normal -0.000000e+00 -0.000000e+00 -1.000000e+00
    outer loop
      vertex -1.507401e+01 -3.417034e+00 1.476000e+00
      vertex -1.507401e+01 -1.904926e+00 1.476000e+00
      vertex -1.334196e+01 -1.904926e+00 1.476000e+00
    endloop
  endfacet
  facet normal -0.000000e+00 -0.000000e+00 -1.000000e+00
    outer loop
      vertex -2.873797e+01 -3.417034e+00 1.476000e+00
      vertex -1.507401e+01 -1.904926e+00 1.476000e+00
      vertex -1.507401e+01 -3.417034e+00 1.476000e+00
    endloop
  endfacet
  facet normal -0.000000e+00 -0.000000e+00 -1.000000e+00
    outer loop
      vertex -2.873797e+01 -3.417034e+00 1.476000e+00
      vertex -2.873797e+01 -1.904926e+00 1.476000e+00
      vertex -1.507401e+01 -1.904926e+00 1.476000e+00
    endloop
  endfacet
  facet normal -0.000000e+00 -0.000000e+00 -1.000000e+00
    outer loop
      vertex -3.047002e+01 -3.417034e+00 1.476000e+00
      vertex -2.873797e+01 -1.904926e+00 1.476000e+00
      vertex -2.873797e+01 -3.417034e+00 1.476000e+00
    endloop
  endfacet
  facet normal -0.000000e+00 -0.000000e+00 -1.000000e+00
    outer loop
      vertex -3.047002e+01 -3.417034e+00 1.476000e+00
      vertex -3.047002e+01 -1.904926e+00 1.476000e+00
      vertex -2.873797e+01 -1.904926e+00 1.476000e+00
    endloop
  endfacet
  facet normal -0.000000e+00 -0.000000e+00 -1.000000e+00
    outer loop
      vertex -4.413398e+01 -3.417034e+00 1.476000e+00
      vertex -3.047002e+01 -1.904926e+00 1.476000e+00
      vertex -3.047002e+01 -3.417034e+00 1.476000e+00
    endloop
  endfacet
  facet normal -0.000000e+00 -0.000000e+00 -1.000000e+00
    outer loop
      vertex -4.413398e+01 -3.417034e+00 1.476000e+00
      vertex -4.413398e+01 -1.904926e+00 1.476000e+00
      vertex -3.047002e+01 -1.904926e+00 1.476000e+00
    endloop
  endfacet
  facet normal -0.000000e+00 -0.000000e+00 -1.000000e+00
    outer loop
      vertex -4.586602e+01 -3.417034e+00 1.476000e+00
      vertex -4.413398e+01 -1.904926e+00 1.476000e+00
      vertex -4.413398e+01 -3.417034e+00 1.476000e+00
    endloop
  endfacet
  facet normal -0.000000e+00 -0.000000e+00 -1.000000e+00
    outer loop
      vertex 2.341601e+01 4.280970e+00 1.476000e+00
      vertex 9.752050e+00 -1.904926e+00 1.476000e+00
      vertex 9.752050e+00 4.280970e+00 1.476000e+00
    endloop
  endfacet
  facet normal -0.000000e+00 -0.000000e+00 -1.000000e+00
    outer loop
      vertex 2.341601e+01 -1.904926e+00 1.476000e+00
      vertex 9.752050e+00 -1.904926e+00 1.476000e+00
      vertex 2.341601e+01 4.280970e+00 1.476000e+00
    endloop
  endfacet
  facet normal -0.000000e+00 -0.000000e+00 -1.000000e+00
    outer loop
      vertex 9.752050e+00 4.280970e+00 1.476000e+00
      vertex 8.020000e+00 4.280970e+00 1.476000e+00
      vertex 2.054047e+00 1.197897e+01 1.476000e+00
    endloop
  endfacet
  facet normal -0.000000e+00 -0.000000e+00 -1.000000e+00
    outer loop
      vertex 2.341601e+01 -2.651105e+01 1.476000e+00
      vertex 1.745005e+01 -2.499894e+01 1.476000e+00
      vertex 1.745005e+01 -1.881304e+01 1.476000e+00
    endloop
  endfacet
  facet normal -0.000000e+00 -0.000000e+00 -1.000000e+00
    outer loop
      vertex 1.745005e+01 -3.420905e+01 1.476000e+00
      vertex 1.745005e+01 -2.499894e+01 1.476000e+00
      vertex 2.341601e+01 -2.651105e+01 1.476000e+00
    endloop
  endfacet
  facet normal -0.000000e+00 -0.000000e+00 -1.000000e+00
    outer loop
      vertex 1.571800e+01 -3.420905e+01 1.476000e+00
      vertex 1.745005e+01 -2.499894e+01 1.476000e+00
      vertex 1.745005e+01 -3.420905e+01 1.476000e+00
    endloop
  endfacet
  facet normal -0.000000e+00 -0.000000e+00 -1.000000e+00
    outer loop
      vertex 1.571800e+01 -2.499894e+01 1.476000e+00
      vertex 1.745005e+01 -2.499894e+01 1.476000e+00
      vertex 1.571800e+01 -3.420905e+01 1.476000e+00
    endloop
  endfacet
  facet normal -0.000000e+00 -0.000000e+00 -1.000000e+00
    outer loop
      vertex -5.643957e+00 -4.809295e+01 1.476000e+00
      vertex 1.571800e+01 -4.039494e+01 1.476000e+00
      vertex 3.111401e+01 -4.809295e+01 1.476000e+00
    endloop
  endfacet
  facet normal -0.000000e+00 -0.000000e+00 -1.000000e+00
    outer loop
      vertex 9.752050e+00 -4.039494e+01 1.476000e+00
      vertex 1.571800e+01 -4.039494e+01 1.476000e+00
      vertex -5.643957e+00 -4.809295e+01 1.476000e+00
    endloop
  endfacet
  facet normal -0.000000e+00 -0.000000e+00 -1.000000e+00
    outer loop
      vertex 9.752050e+00 -4.039494e+01 1.476000e+00
      vertex 1.571800e+01 -3.420905e+01 1.476000e+00
      vertex 1.571800e+01 -4.039494e+01 1.476000e+00
    endloop
  endfacet
  facet normal -0.000000e+00 -0.000000e+00 -1.000000e+00
    outer loop
      vertex 9.752050e+00 -3.420905e+01 1.476000e+00
      vertex 1.571800e+01 -3.420905e+01 1.476000e+00
      vertex 9.752050e+00 -4.039494e+01 1.476000e+00
    endloop
  endfacet
  facet normal -0.000000e+00 -0.000000e+00 -1.000000e+00
    outer loop
      vertex 9.752050e+00 -3.420905e+01 1.476000e+00
      vertex 1.571800e+01 -2.499894e+01 1.476000e+00
      vertex 1.571800e+01 -3.420905e+01 1.476000e+00
    endloop
  endfacet
  facet normal -0.000000e+00 -0.000000e+00 -1.000000e+00
    outer loop
      vertex 9.752050e+00 -2.499894e+01 1.476000e+00
      vertex 1.571800e+01 -2.499894e+01 1.476000e+00
      vertex 9.752050e+00 -3.420905e+01 1.476000e+00
    endloop
  endfacet
  facet normal -0.000000e+00 -0.000000e+00 -1.000000e+00
    outer loop
      vertex 9.752050e+00 -2.499894e+01 1.476000e+00
      vertex 1.571800e+01 -1.881304e+01 1.476000e+00
      vertex 1.571800e+01 -2.499894e+01 1.476000e+00
    endloop
  endfacet
  facet normal -0.000000e+00 -0.000000e+00 -1.000000e+00
    outer loop
      vertex 9.752050e+00 -1.881304e+01 1.476000e+00
      vertex 1.571800e+01 -1.881304e+01 1.476000e+00
      vertex 9.752050e+00 -2.499894e+01 1.476000e+00
    endloop
  endfacet
  facet normal -0.000000e+00 -0.000000e+00 -1.000000e+00
    outer loop
      vertex 2.341601e+01 -2.651105e+01 1.476000e+00
      vertex 3.111401e+01 -1.881304e+01 1.476000e+00
      vertex 2.514806e+01 -2.651105e+01 1.476000e+00
    endloop
  endfacet
  facet normal -0.000000e+00 -0.000000e+00 -1.000000e+00
    outer loop
      vertex 1.745005e+01 -1.881304e+01 1.476000e+00
      vertex 3.111401e+01 -1.881304e+01 1.476000e+00
      vertex 2.341601e+01 -2.651105e+01 1.476000e+00
    endloop
  endfacet
  facet normal -0.000000e+00 -0.000000e+00 -1.000000e+00
    outer loop
      vertex 1.745005e+01 -1.881304e+01 1.476000e+00
      vertex 1.745005e+01 -1.730093e+01 1.476000e+00
      vertex 3.111401e+01 -1.881304e+01 1.476000e+00
    endloop
  endfacet
  facet normal -0.000000e+00 -0.000000e+00 -1.000000e+00
    outer loop
      vertex 1.571800e+01 -1.881304e+01 1.476000e+00
      vertex 1.745005e+01 -1.730093e+01 1.476000e+00
      vertex 1.745005e+01 -1.881304e+01 1.476000e+00
    endloop
  endfacet
  facet normal -0.000000e+00 -0.000000e+00 -1.000000e+00
    outer loop
      vertex 1.571800e+01 -1.881304e+01 1.476000e+00
      vertex 1.571800e+01 -1.730093e+01 1.476000e+00
      vertex 1.745005e+01 -1.730093e+01 1.476000e+00
    endloop
  endfacet
  facet normal -0.000000e+00 -0.000000e+00 -1.000000e+00
    outer loop
      vertex 9.752050e+00 -1.881304e+01 1.476000e+00
      vertex 1.571800e+01 -1.730093e+01 1.476000e+00
      vertex 1.571800e+01 -1.881304e+01 1.476000e+00
    endloop
  endfacet
  facet normal -0.000000e+00 -0.000000e+00 -1.000000e+00
    outer loop
      vertex 9.752050e+00 -1.881304e+01 1.476000e+00
      vertex 1.571800e+01 -1.111504e+01 1.476000e+00
      vertex 1.571800e+01 -1.730093e+01 1.476000e+00
    endloop
  endfacet
  facet normal -0.000000e+00 -0.000000e+00 -1.000000e+00
    outer loop
      vertex 9.752050e+00 -9.602930e+00 1.476000e+00
      vertex 1.571800e+01 -1.111504e+01 1.476000e+00
      vertex 9.752050e+00 -1.881304e+01 1.476000e+00
    endloop
  endfacet
  facet normal -0.000000e+00 -0.000000e+00 -1.000000e+00
    outer loop
      vertex 2.341601e+01 3.507298e+01 1.476000e+00
      vertex 1.745005e+01 4.277099e+01 1.476000e+00
      vertex 2.514806e+01 3.507298e+01 1.476000e+00
    endloop
  endfacet
  facet normal -0.000000e+00 -0.000000e+00 -1.000000e+00
    outer loop
      vertex 2.341601e+01 3.507298e+01 1.476000e+00
      vertex 1.745005e+01 3.658509e+01 1.476000e+00
      vertex 1.745005e+01 4.277099e+01 1.476000e+00
    endloop
  endfacet
  facet normal -0.000000e+00 -0.000000e+00 -1.000000e+00
    outer loop
      vertex 2.341601e+01 2.888709e+01 1.476000e+00
      vertex 1.745005e+01 3.658509e+01 1.476000e+00
      vertex 2.341601e+01 3.507298e+01 1.476000e+00
    endloop
  endfacet
  facet normal -0.000000e+00 -0.000000e+00 -1.000000e+00
    outer loop
      vertex 2.341601e+01 2.888709e+01 1.476000e+00
      vertex 1.571800e+01 3.658509e+01 1.476000e+00
      vertex 1.745005e+01 3.658509e+01 1.476000e+00
    endloop
  endfacet
  facet normal -0.000000e+00 -0.000000e+00 -1.000000e+00
    outer loop
      vertex 9.752050e+00 2.737498e+01 1.476000e+00
      vertex 1.571800e+01 3.658509e+01 1.476000e+00
      vertex 2.341601e+01 2.888709e+01 1.476000e+00
    endloop
  endfacet
  facet normal -0.000000e+00 -0.000000e+00 -1.000000e+00
    outer loop
      vertex 9.752050e+00 3.658509e+01 1.476000e+00
      vertex 9.752050e+00 2.737498e+01 1.476000e+00
      vertex 8.020000e+00 2.737498e+01 1.476000e+00
    endloop
  endfacet
  facet normal -0.000000e+00 -0.000000e+00 -1.000000e+00
    outer loop
      vertex 9.752050e+00 3.658509e+01 1.476000e+00
      vertex 1.571800e+01 3.658509e+01 1.476000e+00
      vertex 9.752050e+00 2.737498e+01 1.476000e+00
    endloop
  endfacet
  facet normal -0.000000e+00 -0.000000e+00 -1.000000e+00
    outer loop
      vertex 1.571800e+01 4.277099e+01 1.476000e+00
      vertex 1.571800e+01 3.658509e+01 1.476000e+00
      vertex 9.752050e+00 3.658509e+01 1.476000e+00
    endloop
  endfacet
  facet normal -0.000000e+00 -0.000000e+00 -1.000000e+00
    outer loop
      vertex 3.284606e+01 2.737498e+01 1.476000e+00
      vertex 3.881202e+01 3.658509e+01 1.476000e+00
      vertex 4.054406e+01 3.658509e+01 1.476000e+00
    endloop
  endfacet
  facet normal -0.000000e+00 -0.000000e+00 -1.000000e+00
    outer loop
      vertex 2.514806e+01 3.507298e+01 1.476000e+00
      vertex 3.881202e+01 3.658509e+01 1.476000e+00
      vertex 3.284606e+01 2.737498e+01 1.476000e+00
    endloop
  endfacet
  facet normal -0.000000e+00 -0.000000e+00 -1.000000e+00
    outer loop
      vertex 2.514806e+01 3.507298e+01 1.476000e+00
      vertex 3.881202e+01 4.277099e+01 1.476000e+00
      vertex 3.881202e+01 3.658509e+01 1.476000e+00
    endloop
  endfacet
  facet normal -0.000000e+00 -0.000000e+00 -1.000000e+00
    outer loop
      vertex 1.745005e+01 4.277099e+01 1.476000e+00
      vertex 3.881202e+01 4.277099e+01 1.476000e+00
      vertex 2.514806e+01 3.507298e+01 1.476000e+00
    endloop
  endfacet
  facet normal -0.000000e+00 -0.000000e+00 -1.000000e+00
    outer loop
      vertex 1.745005e+01 4.277099e+01 1.476000e+00
      vertex 5.000000e+01 5.000000e+01 1.476000e+00
      vertex 3.881202e+01 4.277099e+01 1.476000e+00
    endloop
  endfacet
  facet normal -0.000000e+00 -0.000000e+00 -1.000000e+00
    outer loop
      vertex 1.571800e+01 4.277099e+01 1.476000e+00
      vertex 5.000000e+01 5.000000e+01 1.476000e+00
      vertex 1.745005e+01 4.277099e+01 1.476000e+00
    endloop
  endfacet
  facet normal -0.000000e+00 -0.000000e+00 -1.000000e+00
    outer loop
      vertex 1.571800e+01 4.277099e+01 1.476000e+00
      vertex 9.752050e+00 4.277099e+01 1.476000e+00
      vertex 5.000000e+01 5.000000e+01 1.476000e+00
    endloop
  endfacet
  facet normal -0.000000e+00 -0.000000e+00 -1.000000e+00
    outer loop
      vertex 9.752050e+00 3.658509e+01 1.476000e+00
      vertex 9.752050e+00 4.277099e+01 1.476000e+00
      vertex 1.571800e+01 4.277099e+01 1.476000e+00
    endloop
  endfacet
  facet normal -0.000000e+00 -0.000000e+00 -1.000000e+00
    outer loop
      vertex 3.881202e+01 1.197897e+01 1.476000e+00
      vertex 2.514806e+01 5.793077e+00 1.476000e+00
      vertex 2.514806e+01 1.197897e+01 1.476000e+00
    endloop
  endfacet
  facet normal -0.000000e+00 -0.000000e+00 -1.000000e+00
    outer loop
      vertex 3.881202e+01 5.793077e+00 1.476000e+00
      vertex 2.514806e+01 5.793077e+00 1.476000e+00
      vertex 3.881202e+01 1.197897e+01 1.476000e+00
    endloop
  endfacet
  facet normal -0.000000e+00 -0.000000e+00 -1.000000e+00
    outer loop
      vertex 3.111401e+01 -2.651105e+01 1.476000e+00
      vertex 3.284606e+01 -2.499894e+01 1.476000e+00
      vertex 3.284606e+01 -2.651105e+01 1.476000e+00
    endloop
  endfacet
  facet normal -0.000000e+00 -0.000000e+00 -1.000000e+00
    outer loop
      vertex 3.111401e+01 -2.499894e+01 1.476000e+00
      vertex 3.284606e+01 -2.499894e+01 1.476000e+00
      vertex 3.111401e+01 -2.651105e+01 1.476000e+00
    endloop
  endfacet
  facet normal -0.000000e+00 -0.000000e+00 -1.000000e+00
    outer loop
      vertex 4.054406e+01 -1.730093e+01 1.476000e+00
      vertex 4.054406e+01 -1.111504e+01 1.476000e+00
      vertex 5.000000e+01 -5.000000e+01 1.476000e+00
    endloop
  endfacet
  facet normal -0.000000e+00 -0.000000e+00 -1.000000e+00
    outer loop
      vertex 9.752050e+00 -3.417034e+00 1.476000e+00
      vertex 1.571800e+01 -1.111504e+01 1.476000e+00
      vertex 9.752050e+00 -9.602930e+00 1.476000e+00
    endloop
  endfacet
  facet normal -0.000000e+00 -0.000000e+00 -1.000000e+00
    outer loop
      vertex 2.341601e+01 -3.417034e+00 1.476000e+00
      vertex 1.571800e+01 -1.111504e+01 1.476000e+00
      vertex 9.752050e+00 -3.417034e+00 1.476000e+00
    endloop
  endfacet
  facet normal -0.000000e+00 -0.000000e+00 -1.000000e+00
    outer loop
      vertex 2.341601e+01 -3.417034e+00 1.476000e+00
      vertex 1.745005e+01 -1.111504e+01 1.476000e+00
      vertex 1.571800e+01 -1.111504e+01 1.476000e+00
    endloop
  endfacet
  facet normal -0.000000e+00 -0.000000e+00 -1.000000e+00
    outer loop
      vertex 2.341601e+01 -9.602930e+00 1.476000e+00
      vertex 1.745005e+01 -1.111504e+01 1.476000e+00
      vertex 2.341601e+01 -3.417034e+00 1.476000e+00
    endloop
  endfacet
  facet normal -0.000000e+00 -0.000000e+00 -1.000000e+00
    outer loop
      vertex 2.341601e+01 -9.602930e+00 1.476000e+00
      vertex 1.745005e+01 -1.730093e+01 1.476000e+00
      vertex 1.745005e+01 -1.111504e+01 1.476000e+00
    endloop
  endfacet
  facet normal -0.000000e+00 -0.000000e+00 -1.000000e+00
    outer loop
      vertex 2.514806e+01 -9.602930e+00 1.476000e+00
      vertex 1.745005e+01 -1.730093e+01 1.476000e+00
      vertex 2.341601e+01 -9.602930e+00 1.476000e+00
    endloop
  endfacet
  facet normal -0.000000e+00 -0.000000e+00 -1.000000e+00
    outer loop
      vertex 2.514806e+01 -9.602930e+00 1.476000e+00
      vertex 3.111401e+01 -1.881304e+01 1.476000e+00
      vertex 1.745005e+01 -1.730093e+01 1.476000e+00
    endloop
  endfacet
  facet normal -0.000000e+00 -0.000000e+00 -1.000000e+00
    outer loop
      vertex 3.881202e+01 -1.111504e+01 1.476000e+00
      vertex 3.111401e+01 -1.881304e+01 1.476000e+00
      vertex 2.514806e+01 -9.602930e+00 1.476000e+00
    endloop
  endfacet
  facet normal -0.000000e+00 -0.000000e+00 -1.000000e+00
    outer loop
      vertex 3.881202e+01 -1.111504e+01 1.476000e+00
      vertex 3.284606e+01 -1.881304e+01 1.476000e+00
      vertex 3.111401e+01 -1.881304e+01 1.476000e+00
    endloop
  endfacet
  facet normal -0.000000e+00 -0.000000e+00 -1.000000e+00
    outer loop
      vertex 3.881202e+01 -1.730093e+01 1.476000e+00
      vertex 3.284606e+01 -1.881304e+01 1.476000e+00
      vertex 3.881202e+01 -1.111504e+01 1.476000e+00
    endloop
  endfacet
  facet normal -0.000000e+00 -0.000000e+00 -1.000000e+00
    outer loop
      vertex 3.881202e+01 -1.730093e+01 1.476000e+00
      vertex 3.284606e+01 -2.499894e+01 1.476000e+00
      vertex 3.284606e+01 -1.881304e+01 1.476000e+00
    endloop
  endfacet
  facet normal -0.000000e+00 -0.000000e+00 -1.000000e+00
    outer loop
      vertex 4.054406e+01 -1.730093e+01 1.476000e+00
      vertex 3.284606e+01 -2.499894e+01 1.476000e+00
      vertex 3.881202e+01 -1.730093e+01 1.476000e+00
    endloop
  endfacet
  facet normal -0.000000e+00 -0.000000e+00 -1.000000e+00
    outer loop
      vertex 4.054406e+01 -1.730093e+01 1.476000e+00
      vertex 4.054406e+01 -3.420905e+01 1.476000e+00
      vertex 3.284606e+01 -2.499894e+01 1.476000e+00
    endloop
  endfacet
  facet normal -0.000000e+00 -0.000000e+00 -1.000000e+00
    outer loop
      vertex 5.000000e+01 -5.000000e+01 1.476000e+00
      vertex 4.054406e+01 -3.420905e+01 1.476000e+00
      vertex 4.054406e+01 -1.730093e+01 1.476000e+00
    endloop
  endfacet
  facet normal -0.000000e+00 -0.000000e+00 -1.000000e+00
    outer loop
      vertex 5.000000e+01 -5.000000e+01 1.476000e+00
      vertex 4.054406e+01 -4.039494e+01 1.476000e+00
      vertex 4.054406e+01 -3.420905e+01 1.476000e+00
    endloop
  endfacet
  facet normal -0.000000e+00 -0.000000e+00 -1.000000e+00
    outer loop
      vertex 3.284606e+01 -4.809295e+01 1.476000e+00
      vertex 4.054406e+01 -4.039494e+01 1.476000e+00
      vertex 5.000000e+01 -5.000000e+01 1.476000e+00
    endloop
  endfacet
  facet normal -0.000000e+00 -0.000000e+00 -1.000000e+00
    outer loop
      vertex 3.284606e+01 -4.809295e+01 1.476000e+00
      vertex 3.881202e+01 -4.039494e+01 1.476000e+00
      vertex 4.054406e+01 -4.039494e+01 1.476000e+00
    endloop
  endfacet
  facet normal -0.000000e+00 -0.000000e+00 -1.000000e+00
    outer loop
      vertex 3.284606e+01 -4.190705e+01 1.476000e+00
      vertex 3.881202e+01 -4.039494e+01 1.476000e+00
      vertex 3.284606e+01 -4.809295e+01 1.476000e+00
    endloop
  endfacet
  facet normal -0.000000e+00 -0.000000e+00 -1.000000e+00
    outer loop
      vertex 3.284606e+01 -4.190705e+01 1.476000e+00
      vertex 3.284606e+01 -3.269694e+01 1.476000e+00
      vertex 3.881202e+01 -4.039494e+01 1.476000e+00
    endloop
  endfacet
  facet normal -0.000000e+00 -0.000000e+00 -1.000000e+00
    outer loop
      vertex 3.111401e+01 -4.190705e+01 1.476000e+00
      vertex 3.284606e+01 -3.269694e+01 1.476000e+00
      vertex 3.284606e+01 -4.190705e+01 1.476000e+00
    endloop
  endfacet
  facet normal -0.000000e+00 -0.000000e+00 -1.000000e+00
    outer loop
      vertex 3.111401e+01 -4.190705e+01 1.476000e+00
      vertex 3.111401e+01 -3.269694e+01 1.476000e+00
      vertex 3.284606e+01 -3.269694e+01 1.476000e+00
    endloop
  endfacet
  facet normal -0.000000e+00 -0.000000e+00 -1.000000e+00
    outer loop
      vertex 2.514806e+01 -3.269694e+01 1.476000e+00
      vertex 3.111401e+01 -3.269694e+01 1.476000e+00
      vertex 3.111401e+01 -4.190705e+01 1.476000e+00
    endloop
  endfacet
  facet normal -0.000000e+00 -0.000000e+00 -1.000000e+00
    outer loop
      vertex 2.514806e+01 -3.269694e+01 1.476000e+00
      vertex 3.111401e+01 -2.651105e+01 1.476000e+00
      vertex 3.111401e+01 -3.269694e+01 1.476000e+00
    endloop
  endfacet
  facet normal -0.000000e+00 -0.000000e+00 -1.000000e+00
    outer loop
      vertex 2.514806e+01 -2.651105e+01 1.476000e+00
      vertex 3.111401e+01 -2.651105e+01 1.476000e+00
      vertex 2.514806e+01 -3.269694e+01 1.476000e+00
    endloop
  endfacet
  facet normal -0.000000e+00 -0.000000e+00 -1.000000e+00
    outer loop
      vertex 2.514806e+01 -2.651105e+01 1.476000e+00
      vertex 3.111401e+01 -2.499894e+01 1.476000e+00
      vertex 3.111401e+01 -2.651105e+01 1.476000e+00
    endloop
  endfacet
  facet normal -0.000000e+00 -0.000000e+00 -1.000000e+00
    outer loop
      vertex 3.111401e+01 -1.881304e+01 1.476000e+00
      vertex 3.111401e+01 -2.499894e+01 1.476000e+00
      vertex 2.514806e+01 -2.651105e+01 1.476000e+00
    endloop
  endfacet
  facet normal -0.000000e+00 -0.000000e+00 -1.000000e+00
    outer loop
      vertex 4.054406e+01 1.349108e+01 1.476000e+00
      vertex 4.054406e+01 1.967698e+01 1.476000e+00
      vertex 5.000000e+01 5.000000e+01 1.476000e+00
    endloop
  endfacet
  facet normal -0.000000e+00 -0.000000e+00 -1.000000e+00
    outer loop
      vertex 4.054406e+01 1.197897e+01 1.476000e+00
      vertex 5.000000e+01 5.000000e+01 1.476000e+00
      vertex 4.054406e+01 5.793077e+00 1.476000e+00
    endloop
  endfacet
  facet normal -0.000000e+00 -0.000000e+00 -1.000000e+00
    outer loop
      vertex 4.054406e+01 1.197897e+01 1.476000e+00
      vertex 4.054406e+01 1.349108e+01 1.476000e+00
      vertex 5.000000e+01 5.000000e+01 1.476000e+00
    endloop
  endfacet
  facet normal -0.000000e+00 -0.000000e+00 -1.000000e+00
    outer loop
      vertex 3.881202e+01 1.197897e+01 1.476000e+00
      vertex 4.054406e+01 1.349108e+01 1.476000e+00
      vertex 4.054406e+01 1.197897e+01 1.476000e+00
    endloop
  endfacet
  facet normal -0.000000e+00 -0.000000e+00 -1.000000e+00
    outer loop
      vertex 3.881202e+01 1.197897e+01 1.476000e+00
      vertex 3.881202e+01 1.349108e+01 1.476000e+00
      vertex 4.054406e+01 1.349108e+01 1.476000e+00
    endloop
  endfacet
  facet normal -0.000000e+00 -0.000000e+00 -1.000000e+00
    outer loop
      vertex 2.514806e+01 1.197897e+01 1.476000e+00
      vertex 3.881202e+01 1.349108e+01 1.476000e+00
      vertex 3.881202e+01 1.197897e+01 1.476000e+00
    endloop
  endfacet
  facet normal -0.000000e+00 -0.000000e+00 -1.000000e+00
    outer loop
      vertex 5.000000e+01 5.000000e+01 1.476000e+00
      vertex 4.054406e+01 4.277099e+01 1.476000e+00
      vertex 3.881202e+01 4.277099e+01 1.476000e+00
    endloop
  endfacet
  facet normal -0.000000e+00 -0.000000e+00 -1.000000e+00
    outer loop
      vertex 5.000000e+01 5.000000e+01 1.476000e+00
      vertex 4.054406e+01 3.658509e+01 1.476000e+00
      vertex 4.054406e+01 4.277099e+01 1.476000e+00
    endloop
  endfacet
  facet normal -0.000000e+00 -0.000000e+00 -1.000000e+00
    outer loop
      vertex 4.054406e+01 1.967698e+01 1.476000e+00
      vertex 4.054406e+01 3.658509e+01 1.476000e+00
      vertex 5.000000e+01 5.000000e+01 1.476000e+00
    endloop
  endfacet
  facet normal -0.000000e+00 -0.000000e+00 -1.000000e+00
    outer loop
      vertex 4.054406e+01 1.967698e+01 1.476000e+00
      vertex 3.284606e+01 2.737498e+01 1.476000e+00
      vertex 4.054406e+01 3.658509e+01 1.476000e+00
    endloop
  endfacet
  facet normal -0.000000e+00 -0.000000e+00 -1.000000e+00
    outer loop
      vertex 3.881202e+01 1.967698e+01 1.476000e+00
      vertex 3.284606e+01 2.737498e+01 1.476000e+00
      vertex 4.054406e+01 1.967698e+01 1.476000e+00
    endloop
  endfacet
  facet normal -0.000000e+00 -0.000000e+00 -1.000000e+00
    outer loop
      vertex 3.881202e+01 1.967698e+01 1.476000e+00
      vertex 3.284606e+01 2.118908e+01 1.476000e+00
      vertex 3.284606e+01 2.737498e+01 1.476000e+00
    endloop
  endfacet
  facet normal -0.000000e+00 -0.000000e+00 -1.000000e+00
    outer loop
      vertex 3.881202e+01 1.349108e+01 1.476000e+00
      vertex 3.284606e+01 2.118908e+01 1.476000e+00
      vertex 3.881202e+01 1.967698e+01 1.476000e+00
    endloop
  endfacet
  facet normal -0.000000e+00 -0.000000e+00 -1.000000e+00
    outer loop
      vertex 3.881202e+01 1.349108e+01 1.476000e+00
      vertex 3.111401e+01 2.118908e+01 1.476000e+00
      vertex 3.284606e+01 2.118908e+01 1.476000e+00
    endloop
  endfacet
  facet normal -0.000000e+00 -0.000000e+00 -1.000000e+00
    outer loop
      vertex 2.514806e+01 1.197897e+01 1.476000e+00
      vertex 3.111401e+01 2.118908e+01 1.476000e+00
      vertex 3.881202e+01 1.349108e+01 1.476000e+00
    endloop
  endfacet
  facet normal -0.000000e+00 -0.000000e+00 -1.000000e+00
    outer loop
      vertex 2.514806e+01 1.197897e+01 1.476000e+00
      vertex 1.745005e+01 1.967698e+01 1.476000e+00
      vertex 3.111401e+01 2.118908e+01 1.476000e+00
    endloop
  endfacet
  facet normal -0.000000e+00 -0.000000e+00 -1.000000e+00
    outer loop
      vertex 2.341601e+01 1.197897e+01 1.476000e+00
      vertex 1.745005e+01 1.967698e+01 1.476000e+00
      vertex 2.514806e+01 1.197897e+01 1.476000e+00
    endloop
  endfacet
  facet normal -0.000000e+00 -0.000000e+00 -1.000000e+00
    outer loop
      vertex 2.341601e+01 1.197897e+01 1.476000e+00
      vertex 1.745005e+01 1.349108e+01 1.476000e+00
      vertex 1.745005e+01 1.967698e+01 1.476000e+00
    endloop
  endfacet
  facet normal -0.000000e+00 -0.000000e+00 -1.000000e+00
    outer loop
      vertex 2.341601e+01 5.793077e+00 1.476000e+00
      vertex 1.745005e+01 1.349108e+01 1.476000e+00
      vertex 2.341601e+01 1.197897e+01 1.476000e+00
    endloop
  endfacet
  facet normal -0.000000e+00 -0.000000e+00 -1.000000e+00
    outer loop
      vertex -3.816802e+01 3.507298e+01 1.476000e+00
      vertex -4.413398e+01 3.658509e+01 1.476000e+00
      vertex -4.413398e+01 4.277099e+01 1.476000e+00
    endloop
  endfacet
  facet normal -0.000000e+00 -0.000000e+00 -1.000000e+00
    outer loop
      vertex -4.413398e+01 2.737498e+01 1.476000e+00
      vertex -4.413398e+01 3.658509e+01 1.476000e+00
      vertex -3.816802e+01 3.507298e+01 1.476000e+00
    endloop
  endfacet
  facet normal -0.000000e+00 -0.000000e+00 -1.000000e+00
    outer loop
      vertex -4.586602e+01 2.737498e+01 1.476000e+00
      vertex -4.413398e+01 3.658509e+01 1.476000e+00
      vertex -4.413398e+01 2.737498e+01 1.476000e+00
    endloop
  endfacet
  facet normal -0.000000e+00 -0.000000e+00 -1.000000e+00
    outer loop
      vertex -4.586602e+01 3.658509e+01 1.476000e+00
      vertex -4.413398e+01 3.658509e+01 1.476000e+00
      vertex -4.586602e+01 2.737498e+01 1.476000e+00
    endloop
  endfacet
  facet normal -0.000000e+00 -0.000000e+00 -1.000000e+00
    outer loop
      vertex -5.000000e+01 5.000000e+01 1.476000e+00
      vertex -4.586602e+01 2.737498e+01 1.476000e+00
      vertex -4.586602e+01 2.118908e+01 1.476000e+00
    endloop
  endfacet
  facet normal -0.000000e+00 -0.000000e+00 -1.000000e+00
    outer loop
      vertex -5.000000e+01 5.000000e+01 1.476000e+00
      vertex -4.586602e+01 3.658509e+01 1.476000e+00
      vertex -4.586602e+01 2.737498e+01 1.476000e+00
    endloop
  endfacet
  facet normal -0.000000e+00 -0.000000e+00 -1.000000e+00
    outer loop
      vertex -4.586602e+01 4.277099e+01 1.476000e+00
      vertex -4.586602e+01 3.658509e+01 1.476000e+00
      vertex -5.000000e+01 5.000000e+01 1.476000e+00
    endloop
  endfacet
  facet normal -0.000000e+00 -0.000000e+00 -1.000000e+00
    outer loop
      vertex -3.816802e+01 3.507298e+01 1.476000e+00
      vertex -3.047002e+01 4.277099e+01 1.476000e+00
      vertex -3.643597e+01 3.507298e+01 1.476000e+00
    endloop
  endfacet
  facet normal -0.000000e+00 -0.000000e+00 -1.000000e+00
    outer loop
      vertex -4.413398e+01 4.277099e+01 1.476000e+00
      vertex -3.047002e+01 4.277099e+01 1.476000e+00
      vertex -3.816802e+01 3.507298e+01 1.476000e+00
    endloop
  endfacet
  facet normal -0.000000e+00 -0.000000e+00 -1.000000e+00
    outer loop
      vertex -4.413398e+01 4.277099e+01 1.476000e+00
      vertex -5.000000e+01 5.000000e+01 1.476000e+00
      vertex -3.047002e+01 4.277099e+01 1.476000e+00
    endloop
  endfacet
  facet normal -0.000000e+00 -0.000000e+00 -1.000000e+00
    outer loop
      vertex -4.586602e+01 4.277099e+01 1.476000e+00
      vertex -5.000000e+01 5.000000e+01 1.476000e+00
      vertex -4.413398e+01 4.277099e+01 1.476000e+00
    endloop
  endfacet
  facet normal -0.000000e+00 -0.000000e+00 -1.000000e+00
    outer loop
      vertex 5.000000e+01 -5.000000e+01 1.476000e+00
      vertex 3.111401e+01 -4.809295e+01 1.476000e+00
      vertex 3.284606e+01 -4.809295e+01 1.476000e+00
    endloop
  endfacet
  facet normal -0.000000e+00 -0.000000e+00 -1.000000e+00
    outer loop
      vertex 5.000000e+01 -5.000000e+01 1.476000e+00
      vertex -5.643957e+00 -4.809295e+01 1.476000e+00
      vertex 3.111401e+01 -4.809295e+01 1.476000e+00
    endloop
  endfacet
  facet normal -0.000000e+00 -0.000000e+00 -1.000000e+00
    outer loop
      vertex -5.000000e+01 -5.000000e+01 1.476000e+00
      vertex -5.643957e+00 -4.809295e+01 1.476000e+00
      vertex 5.000000e+01 -5.000000e+01 1.476000e+00
    endloop
  endfacet
  facet normal -0.000000e+00 -0.000000e+00 -1.000000e+00
    outer loop
      vertex -5.000000e+01 -5.000000e+01 1.476000e+00
      vertex -7.376008e+00 -4.809295e+01 1.476000e+00
      vertex -5.643957e+00 -4.809295e+01 1.476000e+00
    endloop
  endfacet
  facet normal -0.000000e+00 -0.000000e+00 -1.000000e+00
    outer loop
      vertex -1.334196e+01 -4.809295e+01 1.476000e+00
      vertex -7.376008e+00 -4.809295e+01 1.476000e+00
      vertex -5.000000e+01 -5.000000e+01 1.476000e+00
    endloop
  endfacet
  facet normal -0.000000e+00 -0.000000e+00 -1.000000e+00
    outer loop
      vertex -1.334196e+01 -4.809295e+01 1.476000e+00
      vertex -7.376008e+00 -4.190705e+01 1.476000e+00
      vertex -7.376008e+00 -4.809295e+01 1.476000e+00
    endloop
  endfacet
  facet normal -0.000000e+00 -0.000000e+00 -1.000000e+00
    outer loop
      vertex -1.334196e+01 -4.190705e+01 1.476000e+00
      vertex -7.376008e+00 -4.190705e+01 1.476000e+00
      vertex -1.334196e+01 -4.809295e+01 1.476000e+00
    endloop
  endfacet
  facet normal -0.000000e+00 -0.000000e+00 -1.000000e+00
    outer loop
      vertex -1.334196e+01 -4.190705e+01 1.476000e+00
      vertex -7.376008e+00 -3.269694e+01 1.476000e+00
      vertex -7.376008e+00 -4.190705e+01 1.476000e+00
    endloop
  endfacet
  facet normal -0.000000e+00 -0.000000e+00 -1.000000e+00
    outer loop
      vertex -1.334196e+01 -3.269694e+01 1.476000e+00
      vertex -7.376008e+00 -3.269694e+01 1.476000e+00
      vertex -1.334196e+01 -4.190705e+01 1.476000e+00
    endloop
  endfacet
  facet normal -0.000000e+00 -0.000000e+00 -1.000000e+00
    outer loop
      vertex -1.334196e+01 -3.269694e+01 1.476000e+00
      vertex -7.376008e+00 -2.651105e+01 1.476000e+00
      vertex -7.376008e+00 -3.269694e+01 1.476000e+00
    endloop
  endfacet
  facet normal -0.000000e+00 -0.000000e+00 -1.000000e+00
    outer loop
      vertex -1.334196e+01 -2.651105e+01 1.476000e+00
      vertex -7.376008e+00 -2.651105e+01 1.476000e+00
      vertex -1.334196e+01 -3.269694e+01 1.476000e+00
    endloop
  endfacet
  facet normal -0.000000e+00 -0.000000e+00 -1.000000e+00
    outer loop
      vertex -1.334196e+01 -2.651105e+01 1.476000e+00
      vertex -7.376008e+00 -1.730093e+01 1.476000e+00
      vertex -7.376008e+00 -2.651105e+01 1.476000e+00
    endloop
  endfacet
  facet normal -0.000000e+00 -0.000000e+00 -1.000000e+00
    outer loop
      vertex -2.103996e+01 -1.881304e+01 1.476000e+00
      vertex -7.376008e+00 -1.730093e+01 1.476000e+00
      vertex -1.334196e+01 -2.651105e+01 1.476000e+00
    endloop
  endfacet
  facet normal -0.000000e+00 -0.000000e+00 -1.000000e+00
    outer loop
      vertex -2.103996e+01 -1.881304e+01 1.476000e+00
      vertex -1.507401e+01 -9.602930e+00 1.476000e+00
      vertex -7.376008e+00 -1.730093e+01 1.476000e+00
    endloop
  endfacet
  facet normal -0.000000e+00 -0.000000e+00 -1.000000e+00
    outer loop
      vertex -2.873797e+01 -1.111504e+01 1.476000e+00
      vertex -1.507401e+01 -9.602930e+00 1.476000e+00
      vertex -2.103996e+01 -1.881304e+01 1.476000e+00
    endloop
  endfacet
  facet normal -0.000000e+00 -0.000000e+00 -1.000000e+00
    outer loop
      vertex -2.873797e+01 -1.111504e+01 1.476000e+00
      vertex -2.873797e+01 -9.602930e+00 1.476000e+00
      vertex -1.507401e+01 -9.602930e+00 1.476000e+00
    endloop
  endfacet
  facet normal -0.000000e+00 -0.000000e+00 -1.000000e+00
    outer loop
      vertex -3.047002e+01 -1.111504e+01 1.476000e+00
      vertex -2.873797e+01 -9.602930e+00 1.476000e+00
      vertex -2.873797e+01 -1.111504e+01 1.476000e+00
    endloop
  endfacet
  facet normal -0.000000e+00 -0.000000e+00 -1.000000e+00
    outer loop
      vertex -3.047002e+01 -1.111504e+01 1.476000e+00
      vertex -3.047002e+01 -9.602930e+00 1.476000e+00
      vertex -2.873797e+01 -9.602930e+00 1.476000e+00
    endloop
  endfacet
  facet normal -0.000000e+00 -0.000000e+00 -1.000000e+00
    outer loop
      vertex -4.413398e+01 -1.111504e+01 1.476000e+00
      vertex -3.047002e+01 -9.602930e+00 1.476000e+00
      vertex -3.047002e+01 -1.111504e+01 1.476000e+00
    endloop
  endfacet
  facet normal -0.000000e+00 -0.000000e+00 -1.000000e+00
    outer loop
      vertex -4.413398e+01 -1.111504e+01 1.476000e+00
      vertex -4.413398e+01 -9.602930e+00 1.476000e+00
      vertex -3.047002e+01 -9.602930e+00 1.476000e+00
    endloop
  endfacet
  facet normal -0.000000e+00 -0.000000e+00 -1.000000e+00
    outer loop
      vertex -4.586602e+01 -1.111504e+01 1.476000e+00
      vertex -4.413398e+01 -9.602930e+00 1.476000e+00
      vertex -4.413398e+01 -1.111504e+01 1.476000e+00
    endloop
  endfacet
  facet normal -0.000000e+00 -0.000000e+00 -1.000000e+00
    outer loop
      vertex -4.586602e+01 -1.111504e+01 1.476000e+00
      vertex -4.586602e+01 -9.602930e+00 1.476000e+00
      vertex -4.413398e+01 -9.602930e+00 1.476000e+00
    endloop
  endfacet
  facet normal -0.000000e+00 -0.000000e+00 -1.000000e+00
    outer loop
      vertex -5.000000e+01 -5.000000e+01 1.476000e+00
      vertex -4.586602e+01 -9.602930e+00 1.476000e+00
      vertex -4.586602e+01 -1.111504e+01 1.476000e+00
    endloop
  endfacet
  facet normal -0.000000e+00 -0.000000e+00 -1.000000e+00
    outer loop
      vertex -5.000000e+01 5.000000e+01 1.476000e+00
      vertex -2.103996e+01 4.277099e+01 1.476000e+00
      vertex -2.277201e+01 4.277099e+01 1.476000e+00
    endloop
  endfacet
  facet normal -0.000000e+00 -0.000000e+00 -1.000000e+00
    outer loop
      vertex -5.000000e+01 5.000000e+01 1.476000e+00
      vertex 3.219961e-01 4.277099e+01 1.476000e+00
      vertex -2.103996e+01 4.277099e+01 1.476000e+00
    endloop
  endfacet
  facet normal -0.000000e+00 -0.000000e+00 -1.000000e+00
    outer loop
      vertex 5.000000e+01 5.000000e+01 1.476000e+00
      vertex 3.219961e-01 4.277099e+01 1.476000e+00
      vertex -5.000000e+01 5.000000e+01 1.476000e+00
    endloop
  endfacet
  facet normal -0.000000e+00 -0.000000e+00 -1.000000e+00
    outer loop
      vertex 5.000000e+01 5.000000e+01 1.476000e+00
      vertex 2.054047e+00 4.277099e+01 1.476000e+00
      vertex 3.219961e-01 4.277099e+01 1.476000e+00
    endloop
  endfacet
  facet normal -0.000000e+00 -0.000000e+00 -1.000000e+00
    outer loop
      vertex 8.020000e+00 4.277099e+01 1.476000e+00
      vertex 2.054047e+00 4.277099e+01 1.476000e+00
      vertex 5.000000e+01 5.000000e+01 1.476000e+00
    endloop
  endfacet
  facet normal -0.000000e+00 -0.000000e+00 -1.000000e+00
    outer loop
      vertex 8.020000e+00 4.277099e+01 1.476000e+00
      vertex 2.054047e+00 3.658509e+01 1.476000e+00
      vertex 2.054047e+00 4.277099e+01 1.476000e+00
    endloop
  endfacet
  facet normal -0.000000e+00 -0.000000e+00 -1.000000e+00
    outer loop
      vertex 8.020000e+00 3.658509e+01 1.476000e+00
      vertex 2.054047e+00 3.658509e+01 1.476000e+00
      vertex 8.020000e+00 4.277099e+01 1.476000e+00
    endloop
  endfacet
  facet normal -0.000000e+00 -0.000000e+00 -1.000000e+00
    outer loop
      vertex 8.020000e+00 3.658509e+01 1.476000e+00
      vertex 2.054047e+00 2.737498e+01 1.476000e+00
      vertex 2.054047e+00 3.658509e+01 1.476000e+00
    endloop
  endfacet
  facet normal -0.000000e+00 -0.000000e+00 -1.000000e+00
    outer loop
      vertex 8.020000e+00 2.737498e+01 1.476000e+00
      vertex 2.054047e+00 2.737498e+01 1.476000e+00
      vertex 8.020000e+00 3.658509e+01 1.476000e+00
    endloop
  endfacet
  facet normal -0.000000e+00 -0.000000e+00 -1.000000e+00
    outer loop
      vertex 8.020000e+00 2.737498e+01 1.476000e+00
      vertex 2.054047e+00 2.118908e+01 1.476000e+00
      vertex 2.054047e+00 2.737498e+01 1.476000e+00
    endloop
  endfacet
  facet normal -0.000000e+00 -0.000000e+00 -1.000000e+00
    outer loop
      vertex 8.020000e+00 2.118908e+01 1.476000e+00
      vertex 2.054047e+00 2.118908e+01 1.476000e+00
      vertex 8.020000e+00 2.737498e+01 1.476000e+00
    endloop
  endfacet
  facet normal -0.000000e+00 -0.000000e+00 -1.000000e+00
    outer loop
      vertex 8.020000e+00 2.118908e+01 1.476000e+00
      vertex 2.054047e+00 1.197897e+01 1.476000e+00
      vertex 2.054047e+00 2.118908e+01 1.476000e+00
    endloop
  endfacet
  facet normal -0.000000e+00 -0.000000e+00 -1.000000e+00
    outer loop
      vertex 1.571800e+01 1.349108e+01 1.476000e+00
      vertex 2.054047e+00 1.197897e+01 1.476000e+00
      vertex 8.020000e+00 2.118908e+01 1.476000e+00
    endloop
  endfacet
  facet normal -0.000000e+00 -0.000000e+00 -1.000000e+00
    outer loop
      vertex 1.571800e+01 1.349108e+01 1.476000e+00
      vertex 9.752050e+00 4.280970e+00 1.476000e+00
      vertex 2.054047e+00 1.197897e+01 1.476000e+00
    endloop
  endfacet
  facet normal -0.000000e+00 -0.000000e+00 -1.000000e+00
    outer loop
      vertex 2.341601e+01 5.793077e+00 1.476000e+00
      vertex 9.752050e+00 4.280970e+00 1.476000e+00
      vertex 1.571800e+01 1.349108e+01 1.476000e+00
    endloop
  endfacet
  facet normal -0.000000e+00 -0.000000e+00 -1.000000e+00
    outer loop
      vertex 2.341601e+01 5.793077e+00 1.476000e+00
      vertex 2.341601e+01 4.280970e+00 1.476000e+00
      vertex 9.752050e+00 4.280970e+00 1.476000e+00
    endloop
  endfacet
  facet normal -0.000000e+00 -0.000000e+00 -1.000000e+00
    outer loop
      vertex 2.514806e+01 5.793077e+00 1.476000e+00
      vertex 2.341601e+01 4.280970e+00 1.476000e+00
      vertex 2.341601e+01 5.793077e+00 1.476000e+00
    endloop
  endfacet
  facet normal -0.000000e+00 -0.000000e+00 -1.000000e+00
    outer loop
      vertex 2.514806e+01 5.793077e+00 1.476000e+00
      vertex 2.514806e+01 4.280970e+00 1.476000e+00
      vertex 2.341601e+01 4.280970e+00 1.476000e+00
    endloop
  endfacet
  facet normal -0.000000e+00 -0.000000e+00 -1.000000e+00
    outer loop
      vertex 3.881202e+01 5.793077e+00 1.476000e+00
      vertex 2.514806e+01 4.280970e+00 1.476000e+00
      vertex 2.514806e+01 5.793077e+00 1.476000e+00
    endloop
  endfacet
  facet normal -0.000000e+00 -0.000000e+00 -1.000000e+00
    outer loop
      vertex 3.881202e+01 5.793077e+00 1.476000e+00
      vertex 3.881202e+01 4.280970e+00 1.476000e+00
      vertex 2.514806e+01 4.280970e+00 1.476000e+00
    endloop
  endfacet
  facet normal -0.000000e+00 -0.000000e+00 -1.000000e+00
    outer loop
      vertex 4.054406e+01 5.793077e+00 1.476000e+00
      vertex 3.881202e+01 4.280970e+00 1.476000e+00
      vertex 3.881202e+01 5.793077e+00 1.476000e+00
    endloop
  endfacet
  facet normal -0.000000e+00 -0.000000e+00 -1.000000e+00
    outer loop
      vertex 4.054406e+01 5.793077e+00 1.476000e+00
      vertex 4.054406e+01 4.280970e+00 1.476000e+00
      vertex 3.881202e+01 4.280970e+00 1.476000e+00
    endloop
  endfacet
  facet normal -0.000000e+00 -0.000000e+00 -1.000000e+00
    outer loop
      vertex 5.000000e+01 5.000000e+01 1.476000e+00
      vertex 4.054406e+01 4.280970e+00 1.476000e+00
      vertex 4.054406e+01 5.793077e+00 1.476000e+00
    endloop
  endfacet
  facet normal -0.000000e+00 -0.000000e+00 -1.000000e+00
    outer loop
      vertex 5.000000e+01 5.000000e+01 1.476000e+00
      vertex 4.054406e+01 -1.904926e+00 1.476000e+00
      vertex 4.054406e+01 4.280970e+00 1.476000e+00
    endloop
  endfacet
  facet normal -0.000000e+00 -0.000000e+00 -1.000000e+00
    outer loop
      vertex 5.000000e+01 -5.000000e+01 1.476000e+00
      vertex 4.054406e+01 -1.904926e+00 1.476000e+00
      vertex 5.000000e+01 5.000000e+01 1.476000e+00
    endloop
  endfacet
  facet normal -0.000000e+00 -0.000000e+00 -1.000000e+00
    outer loop
      vertex -5.000000e+01 -5.000000e+01 1.476000e+00
      vertex -4.586602e+01 -3.417034e+00 1.476000e+00
      vertex -4.586602e+01 -9.602930e+00 1.476000e+00
    endloop
  endfacet
  facet normal -0.000000e+00 -0.000000e+00 -1.000000e+00
    outer loop
      vertex -5.000000e+01 -5.000000e+01 1.476000e+00
      vertex -4.586602e+01 -1.904926e+00 1.476000e+00
      vertex -4.586602e+01 -3.417034e+00 1.476000e+00
    endloop
  endfacet
  facet normal -0.000000e+00 -0.000000e+00 -1.000000e+00
    outer loop
      vertex -5.000000e+01 5.000000e+01 1.476000e+00
      vertex -4.586602e+01 -1.904926e+00 1.476000e+00
      vertex -5.000000e+01 -5.000000e+01 1.476000e+00
    endloop
  endfacet
  facet normal -0.000000e+00 -0.000000e+00 -1.000000e+00
    outer loop
      vertex -5.000000e+01 5.000000e+01 1.476000e+00
      vertex -4.586602e+01 4.280970e+00 1.476000e+00
      vertex -4.586602e+01 -1.904926e+00 1.476000e+00
    endloop
  endfacet
  facet normal -0.000000e+00 -0.000000e+00 -1.000000e+00
    outer loop
      vertex -4.586602e+01 5.793077e+00 1.476000e+00
      vertex -4.586602e+01 4.280970e+00 1.476000e+00
      vertex -5.000000e+01 5.000000e+01 1.476000e+00
    endloop
  endfacet
  facet normal -0.000000e+00 -0.000000e+00 -1.000000e+00
    outer loop
      vertex -1.334196e+01 4.280970e+00 1.476000e+00
      vertex -3.822291e-01 1.179021e-01 1.476000e+00
      vertex -1.334196e+01 -1.904926e+00 1.476000e+00
    endloop
  endfacet
  facet normal -0.000000e+00 -0.000000e+00 -1.000000e+00
    outer loop
      vertex -1.334196e+01 4.280970e+00 1.476000e+00
      vertex -3.304955e-01 2.253280e-01 1.476000e+00
      vertex -3.822291e-01 1.179021e-01 1.476000e+00
    endloop
  endfacet
  facet normal -0.000000e+00 -0.000000e+00 -1.000000e+00
    outer loop
      vertex 3.219961e-01 5.793077e+00 1.476000e+00
      vertex -3.304955e-01 2.253280e-01 1.476000e+00
      vertex -1.334196e+01 4.280970e+00 1.476000e+00
    endloop
  endfacet
  facet normal -0.000000e+00 -0.000000e+00 -1.000000e+00
    outer loop
      vertex 3.219961e-01 5.793077e+00 1.476000e+00
      vertex -2.493959e-01 3.127326e-01 1.476000e+00
      vertex -3.304955e-01 2.253280e-01 1.476000e+00
    endloop
  endfacet
  facet normal -0.000000e+00 -0.000000e+00 -1.000000e+00
    outer loop
      vertex -1.461364e-01 3.723495e-01 1.476000e+00
      vertex -2.493959e-01 3.127326e-01 1.476000e+00
      vertex 3.219961e-01 5.793077e+00 1.476000e+00
    endloop
  endfacet
  facet normal -0.000000e+00 -0.000000e+00 -1.000000e+00
    outer loop
      vertex 3.219961e-01 5.793077e+00 1.476000e+00
      vertex -2.989204e-02 3.988815e-01 1.476000e+00
      vertex -1.461364e-01 3.723495e-01 1.476000e+00
    endloop
  endfacet
  facet normal -0.000000e+00 -0.000000e+00 -1.000000e+00
    outer loop
      vertex 3.219961e-01 5.793077e+00 1.476000e+00
      vertex 8.900838e-02 3.899712e-01 1.476000e+00
      vertex -2.989204e-02 3.988815e-01 1.476000e+00
    endloop
  endfacet
  facet normal -0.000000e+00 -0.000000e+00 -1.000000e+00
    outer loop
      vertex 2.054047e+00 5.793077e+00 1.476000e+00
      vertex 8.900838e-02 3.899712e-01 1.476000e+00
      vertex 3.219961e-01 5.793077e+00 1.476000e+00
    endloop
  endfacet
  facet normal -0.000000e+00 -0.000000e+00 -1.000000e+00
    outer loop
      vertex 2.054047e+00 5.793077e+00 1.476000e+00
      vertex 2.000000e-01 3.464102e-01 1.476000e+00
      vertex 8.900838e-02 3.899712e-01 1.476000e+00
    endloop
  endfacet
  facet normal -0.000000e+00 -0.000000e+00 -1.000000e+00
    outer loop
      vertex 2.054047e+00 5.793077e+00 1.476000e+00
      vertex 2.932208e-01 2.720691e-01 1.476000e+00
      vertex 2.000000e-01 3.464102e-01 1.476000e+00
    endloop
  endfacet
  facet normal -0.000000e+00 -0.000000e+00 -1.000000e+00
    outer loop
      vertex 3.603875e-01 1.735535e-01 1.476000e+00
      vertex 2.932208e-01 2.720691e-01 1.476000e+00
      vertex 2.054047e+00 5.793077e+00 1.476000e+00
    endloop
  endfacet
  facet normal -0.000000e+00 -0.000000e+00 -1.000000e+00
    outer loop
      vertex 8.020000e+00 4.280970e+00 1.476000e+00
      vertex 2.054047e+00 5.793077e+00 1.476000e+00
      vertex 2.054047e+00 1.197897e+01 1.476000e+00
    endloop
  endfacet
  facet normal -0.000000e+00 -0.000000e+00 -1.000000e+00
    outer loop
      vertex 8.020000e+00 4.280970e+00 1.476000e+00
      vertex 3.603875e-01 1.735535e-01 1.476000e+00
      vertex 2.054047e+00 5.793077e+00 1.476000e+00
    endloop
  endfacet
  facet normal -0.000000e+00 -0.000000e+00 -1.000000e+00
    outer loop
      vertex 3.955323e-01 5.961690e-02 1.476000e+00
      vertex 3.603875e-01 1.735535e-01 1.476000e+00
      vertex 8.020000e+00 4.280970e+00 1.476000e+00
    endloop
  endfacet
  facet normal -0.000000e+00 -0.000000e+00 -1.000000e+00
    outer loop
      vertex 8.020000e+00 -1.904926e+00 1.476000e+00
      vertex 3.955323e-01 5.961690e-02 1.476000e+00
      vertex 8.020000e+00 4.280970e+00 1.476000e+00
    endloop
  endfacet
  facet normal -0.000000e+00 -0.000000e+00 -1.000000e+00
    outer loop
      vertex 3.955323e-01 -5.961690e-02 1.476000e+00
      vertex 3.955323e-01 5.961690e-02 1.476000e+00
      vertex 8.020000e+00 -1.904926e+00 1.476000e+00
    endloop
  endfacet
  facet normal -0.000000e+00 -0.000000e+00 -1.000000e+00
    outer loop
      vertex 4.054406e+01 -9.602930e+00 1.476000e+00
      vertex 4.054406e+01 -1.111504e+01 1.476000e+00
      vertex 3.881202e+01 -1.111504e+01 1.476000e+00
    endloop
  endfacet
  facet normal -0.000000e+00 -0.000000e+00 -1.000000e+00
    outer loop
      vertex 4.054406e+01 -9.602930e+00 1.476000e+00
      vertex 5.000000e+01 -5.000000e+01 1.476000e+00
      vertex 4.054406e+01 -1.111504e+01 1.476000e+00
    endloop
  endfacet
  facet normal -0.000000e+00 -0.000000e+00 -1.000000e+00
    outer loop
      vertex 4.054406e+01 -3.417034e+00 1.476000e+00
      vertex 5.000000e+01 -5.000000e+01 1.476000e+00
      vertex 4.054406e+01 -9.602930e+00 1.476000e+00
    endloop
  endfacet
  facet normal -0.000000e+00 -0.000000e+00 -1.000000e+00
    outer loop
      vertex 4.054406e+01 -3.417034e+00 1.476000e+00
      vertex 4.054406e+01 -1.904926e+00 1.476000e+00
      vertex 5.000000e+01 -5.000000e+01 1.476000e+00
    endloop
  endfacet
  facet normal -0.000000e+00 -0.000000e+00 -1.000000e+00
    outer loop
      vertex 3.881202e+01 -3.417034e+00 1.476000e+00
      vertex 4.054406e+01 -1.904926e+00 1.476000e+00
      vertex 4.054406e+01 -3.417034e+00 1.476000e+00
    endloop
  endfacet
  facet normal -0.000000e+00 -0.000000e+00 -1.000000e+00
    outer loop
      vertex 3.881202e+01 -3.417034e+00 1.476000e+00
      vertex 3.881202e+01 -1.904926e+00 1.476000e+00
      vertex 4.054406e+01 -1.904926e+00 1.476000e+00
    endloop
  endfacet
  facet normal -0.000000e+00 -0.000000e+00 -1.000000e+00
    outer loop
      vertex 2.514806e+01 -3.417034e+00 1.476000e+00
      vertex 3.881202e+01 -1.904926e+00 1.476000e+00
      vertex 3.881202e+01 -3.417034e+00 1.476000e+00
    endloop
  endfacet
  facet normal -0.000000e+00 -0.000000e+00 -1.000000e+00
    outer loop
      vertex 2.514806e+01 -3.417034e+00 1.476000e+00
      vertex 2.514806e+01 -1.904926e+00 1.476000e+00
      vertex 3.881202e+01 -1.904926e+00 1.476000e+00
    endloop
  endfacet
  facet normal -0.000000e+00 -0.000000e+00 -1.000000e+00
    outer loop
      vertex 2.341601e+01 -3.417034e+00 1.476000e+00
      vertex 2.514806e+01 -1.904926e+00 1.476000e+00
      vertex 2.514806e+01 -3.417034e+00 1.476000e+00
    endloop
  endfacet
  facet normal -0.000000e+00 -0.000000e+00 -1.000000e+00
    outer loop
      vertex 2.341601e+01 -3.417034e+00 1.476000e+00
      vertex 2.341601e+01 -1.904926e+00 1.476000e+00
      vertex 2.514806e+01 -1.904926e+00 1.476000e+00
    endloop
  endfacet
  facet normal -0.000000e+00 -0.000000e+00 -1.000000e+00
    outer loop
      vertex 9.752050e+00 -3.417034e+00 1.476000e+00
      vertex 2.341601e+01 -1.904926e+00 1.476000e+00
      vertex 2.341601e+01 -3.417034e+00 1.476000e+00
    endloop
  endfacet
  facet normal -0.000000e+00 -0.000000e+00 -1.000000e+00
    outer loop
      vertex 9.752050e+00 -3.417034e+00 1.476000e+00
      vertex 9.752050e+00 -1.904926e+00 1.476000e+00
      vertex 2.341601e+01 -1.904926e+00 1.476000e+00
    endloop
  endfacet
  facet normal -0.000000e+00 -0.000000e+00 -1.000000e+00
    outer loop
      vertex 8.020000e+00 -3.417034e+00 1.476000e+00
      vertex 9.752050e+00 -1.904926e+00 1.476000e+00
      vertex 9.752050e+00 -3.417034e+00 1.476000e+00
    endloop
  endfacet
  facet normal -0.000000e+00 -0.000000e+00 -1.000000e+00
    outer loop
      vertex 8.020000e+00 -3.417034e+00 1.476000e+00
      vertex 8.020000e+00 -1.904926e+00 1.476000e+00
      vertex 9.752050e+00 -1.904926e+00 1.476000e+00
    endloop
  endfacet
  facet normal -0.000000e+00 -0.000000e+00 -1.000000e+00
    outer loop
      vertex 2.054047e+00 -3.417034e+00 1.476000e+00
      vertex 8.020000e+00 -1.904926e+00 1.476000e+00
      vertex 8.020000e+00 -3.417034e+00 1.476000e+00
    endloop
  endfacet
  facet normal -0.000000e+00 -0.000000e+00 -1.000000e+00
    outer loop
      vertex 2.054047e+00 -3.417034e+00 1.476000e+00
      vertex 3.955323e-01 -5.961690e-02 1.476000e+00
      vertex 8.020000e+00 -1.904926e+00 1.476000e+00
    endloop
  endfacet
  facet normal -0.000000e+00 -0.000000e+00 -1.000000e+00
    outer loop
      vertex 3.603875e-01 -1.735535e-01 1.476000e+00
      vertex 3.955323e-01 -5.961690e-02 1.476000e+00
      vertex 2.054047e+00 -3.417034e+00 1.476000e+00
    endloop
  endfacet
  facet normal -0.000000e+00 -0.000000e+00 -1.000000e+00
    outer loop
      vertex 2.054047e+00 -3.417034e+00 1.476000e+00
      vertex 2.932208e-01 -2.720691e-01 1.476000e+00
      vertex 3.603875e-01 -1.735535e-01 1.476000e+00
    endloop
  endfacet
  facet normal -0.000000e+00 -0.000000e+00 -1.000000e+00
    outer loop
      vertex 2.054047e+00 -3.417034e+00 1.476000e+00
      vertex 2.000000e-01 -3.464102e-01 1.476000e+00
      vertex 2.932208e-01 -2.720691e-01 1.476000e+00
    endloop
  endfacet
  facet normal -0.000000e+00 -0.000000e+00 -1.000000e+00
    outer loop
      vertex 3.219961e-01 -3.417034e+00 1.476000e+00
      vertex 2.000000e-01 -3.464102e-01 1.476000e+00
      vertex 2.054047e+00 -3.417034e+00 1.476000e+00
    endloop
  endfacet
  facet normal -0.000000e+00 -0.000000e+00 -1.000000e+00
    outer loop
      vertex 3.219961e-01 -3.417034e+00 1.476000e+00
      vertex 8.900838e-02 -3.899712e-01 1.476000e+00
      vertex 2.000000e-01 -3.464102e-01 1.476000e+00
    endloop
  endfacet
  facet normal -0.000000e+00 -0.000000e+00 -1.000000e+00
    outer loop
      vertex 3.219961e-01 -3.417034e+00 1.476000e+00
      vertex -2.989204e-02 -3.988815e-01 1.476000e+00
      vertex 8.900838e-02 -3.899712e-01 1.476000e+00
    endloop
  endfacet
  facet normal -0.000000e+00 -0.000000e+00 -1.000000e+00
    outer loop
      vertex -1.461364e-01 -3.723495e-01 1.476000e+00
      vertex -2.989204e-02 -3.988815e-01 1.476000e+00
      vertex 3.219961e-01 -3.417034e+00 1.476000e+00
    endloop
  endfacet
  facet normal -0.000000e+00 -0.000000e+00 -1.000000e+00
    outer loop
      vertex 3.219961e-01 -3.417034e+00 1.476000e+00
      vertex -2.493959e-01 -3.127326e-01 1.476000e+00
      vertex -1.461364e-01 -3.723495e-01 1.476000e+00
    endloop
  endfacet
  facet normal -0.000000e+00 -0.000000e+00 -1.000000e+00
    outer loop
      vertex 3.219961e-01 -3.417034e+00 1.476000e+00
      vertex -3.304955e-01 -2.253280e-01 1.476000e+00
      vertex -2.493959e-01 -3.127326e-01 1.476000e+00
    endloop
  endfacet
  facet normal -0.000000e+00 -0.000000e+00 -1.000000e+00
    outer loop
      vertex -1.334196e+01 -3.417034e+00 1.476000e+00
      vertex -3.304955e-01 -2.253280e-01 1.476000e+00
      vertex 3.219961e-01 -3.417034e+00 1.476000e+00
    endloop
  endfacet
  facet normal -0.000000e+00 -0.000000e+00 -1.000000e+00
    outer loop
      vertex -1.334196e+01 -3.417034e+00 1.476000e+00
      vertex -3.822291e-01 -1.179021e-01 1.476000e+00
      vertex -3.304955e-01 -2.253280e-01 1.476000e+00
    endloop
  endfacet
  facet normal -0.000000e+00 -0.000000e+00 -1.000000e+00
    outer loop
      vertex -1.334196e+01 -1.904926e+00 1.476000e+00
      vertex -3.822291e-01 -1.179021e-01 1.476000e+00
      vertex -1.334196e+01 -3.417034e+00 1.476000e+00
    endloop
  endfacet
  facet normal -0.000000e+00 -0.000000e+00 -1.000000e+00
    outer loop
      vertex -1.334196e+01 -1.904926e+00 1.476000e+00
      vertex -4.000000e-01 4.898587e-17 1.476000e+00
      vertex -3.822291e-01 -1.179021e-01 1.476000e+00
    endloop
  endfacet
  facet normal -0.000000e+00 -0.000000e+00 -1.000000e+00
    outer loop
      vertex -3.822291e-01 1.179021e-01 1.476000e+00
      vertex -4.000000e-01 4.898587e-17 1.476000e+00
      vertex -1.334196e+01 -1.904926e+00 1.476000e+00
    endloop
  endfacet
  facet normal 9.703819e-01 1.965034e-01 0.000000e+00
    outer loop
      vertex -3.822291e-01 -1.179021e-01 1.876000e+00
      vertex -3.822291e-01 -1.179021e-01 1.476000e+00
      vertex -4.000000e-01 4.898587e-17 1.476000e+00
    endloop
  endfacet
  facet normal 9.124615e-01 3.842768e-01 -0.000000e+00
    outer loop
      vertex -3.304955e-01 -2.253280e-01 1.876000e+00
      vertex -3.822291e-01 -1.179021e-01 1.476000e+00
      vertex -3.822291e-01 -1.179021e-01 1.876000e+00
    endloop
  endfacet
  facet normal 8.693501e-01 4.737984e-01 -0.000000e+00
    outer loop
      vertex -3.304955e-01 -2.253280e-01 1.876000e+00
      vertex -3.304955e-01 -2.253280e-01 1.476000e+00
      vertex -3.822291e-01 -1.179021e-01 1.476000e+00
    endloop
  endfacet
  facet normal 7.586557e-01 6.361572e-01 -0.000000e+00
    outer loop
      vertex -2.493959e-01 -3.127326e-01 1.876000e+00
      vertex -3.304955e-01 -2.253280e-01 1.476000e+00
      vertex -3.304955e-01 -2.253280e-01 1.876000e+00
    endloop
  endfacet
  facet normal 6.910728e-01 7.089944e-01 -0.000000e+00
    outer loop
      vertex -2.493959e-01 -3.127326e-01 1.876000e+00
      vertex -2.493959e-01 -3.127326e-01 1.476000e+00
      vertex -3.304955e-01 -2.253280e-01 1.476000e+00
    endloop
  endfacet
  facet normal 5.374402e-01 8.315123e-01 -0.000000e+00
    outer loop
      vertex -1.461364e-01 -3.723495e-01 1.876000e+00
      vertex -2.493959e-01 -3.127326e-01 1.476000e+00
      vertex -2.493959e-01 -3.127326e-01 1.876000e+00
    endloop
  endfacet
  facet normal 4.513906e-01 8.811930e-01 -0.000000e+00
    outer loop
      vertex -1.461364e-01 -3.723495e-01 1.876000e+00
      vertex -1.461364e-01 -3.723495e-01 1.476000e+00
      vertex -2.493959e-01 -3.127326e-01 1.476000e+00
    endloop
  endfacet
  facet normal 2.684707e-01 9.529838e-01 -0.000000e+00
    outer loop
      vertex -2.989204e-02 -3.988815e-01 1.876000e+00
      vertex -1.461364e-01 -3.723495e-01 1.476000e+00
      vertex -1.461364e-01 -3.723495e-01 1.876000e+00
    endloop
  endfacet
  facet normal 1.716004e-01 9.750938e-01 -0.000000e+00
    outer loop
      vertex -2.989204e-02 -3.988815e-01 1.876000e+00
      vertex -2.989204e-02 -3.988815e-01 1.476000e+00
      vertex -1.461364e-01 -3.723495e-01 1.476000e+00
    endloop
  endfacet
  facet normal -2.435359e-02 9.897785e-01 -0.000000e+00
    outer loop
      vertex 8.900838e-02 -3.899712e-01 1.876000e+00
      vertex -2.989204e-02 -3.988815e-01 1.476000e+00
      vertex -2.989204e-02 -3.988815e-01 1.876000e+00
    endloop
  endfacet
  facet normal -1.234373e-01 9.823532e-01 -0.000000e+00
    outer loop
      vertex 8.900838e-02 -3.899712e-01 1.876000e+00
      vertex 8.900838e-02 -3.899712e-01 1.476000e+00
      vertex -2.989204e-02 -3.988815e-01 1.476000e+00
    endloop
  endfacet
  facet normal -3.150140e-01 9.386271e-01 -0.000000e+00
    outer loop
      vertex 2.000000e-01 -3.464102e-01 1.876000e+00
      vertex 8.900838e-02 -3.899712e-01 1.476000e+00
      vertex 8.900838e-02 -3.899712e-01 1.876000e+00
    endloop
  endfacet
  facet normal -4.075070e-01 9.023263e-01 -0.000000e+00
    outer loop
      vertex 2.000000e-01 -3.464102e-01 1.876000e+00
      vertex 2.000000e-01 -3.464102e-01 1.476000e+00
      vertex 8.900838e-02 -3.899712e-01 1.476000e+00
    endloop
  endfacet
  facet normal -5.776840e-01 8.040745e-01 -0.000000e+00
    outer loop
      vertex 2.932208e-01 -2.720691e-01 1.876000e+00
      vertex 2.000000e-01 -3.464102e-01 1.476000e+00
      vertex 2.000000e-01 -3.464102e-01 1.876000e+00
    endloop
  endfacet
  facet normal -6.553679e-01 7.421236e-01 -0.000000e+00
    outer loop
      vertex 2.932208e-01 -2.720691e-01 1.876000e+00
      vertex 2.932208e-01 -2.720691e-01 1.476000e+00
      vertex 2.000000e-01 -3.464102e-01 1.476000e+00
    endloop
  endfacet
  facet normal -7.890242e-01 5.980764e-01 -0.000000e+00
    outer loop
      vertex 3.603875e-01 -1.735535e-01 1.876000e+00
      vertex 2.932208e-01 -2.720691e-01 1.476000e+00
      vertex 2.932208e-01 -2.720691e-01 1.876000e+00
    endloop
  endfacet
  facet normal -8.449965e-01 5.159801e-01 -0.000000e+00
    outer loop
      vertex 3.603875e-01 -1.735535e-01 1.876000e+00
      vertex 3.603875e-01 -1.735535e-01 1.476000e+00
      vertex 2.932208e-01 -2.720691e-01 1.476000e+00
    endloop
  endfacet
  facet normal -9.302561e-01 3.389366e-01 -0.000000e+00
    outer loop
      vertex 3.955323e-01 -5.961690e-02 1.876000e+00
      vertex 3.603875e-01 -1.735535e-01 1.476000e+00
      vertex 3.603875e-01 -1.735535e-01 1.876000e+00
    endloop
  endfacet
  facet normal -9.595435e-01 2.439894e-01 -0.000000e+00
    outer loop
      vertex 3.955323e-01 -5.961690e-02 1.876000e+00
      vertex 3.955323e-01 -5.961690e-02 1.476000e+00
      vertex 3.603875e-01 -1.735535e-01 1.476000e+00
    endloop
  endfacet
  facet normal -9.888308e-01 4.968075e-02 -0.000000e+00
    outer loop
      vertex 3.955323e-01 5.961690e-02 1.876000e+00
      vertex 3.955323e-01 -5.961690e-02 1.476000e+00
      vertex 3.955323e-01 -5.961690e-02 1.876000e+00
    endloop
  endfacet
  facet normal -9.888308e-01 -4.968075e-02 -0.000000e+00
    outer loop
      vertex 3.955323e-01 5.961690e-02 1.876000e+00
      vertex 3.955323e-01 5.961690e-02 1.476000e+00
      vertex 3.955323e-01 -5.961690e-02 1.476000e+00
    endloop
  endfacet
  facet normal -9.595435e-01 -2.439894e-01 -0.000000e+00
    outer loop
      vertex 3.603875e-01 1.735535e-01 1.876000e+00
      vertex 3.955323e-01 5.961690e-02 1.476000e+00
      vertex 3.955323e-01 5.961690e-02 1.876000e+00
    endloop
  endfacet
  facet normal -9.302562e-01 -3.389366e-01 -0.000000e+00
    outer loop
      vertex 3.603875e-01 1.735535e-01 1.876000e+00
      vertex 3.603875e-01 1.735535e-01 1.476000e+00
      vertex 3.955323e-01 5.961690e-02 1.476000e+00
    endloop
  endfacet
  facet normal -8.449965e-01 -5.159801e-01 -0.000000e+00
    outer loop
      vertex 2.932208e-01 2.720691e-01 1.876000e+00
      vertex 3.603875e-01 1.735535e-01 1.476000e+00
      vertex 3.603875e-01 1.735535e-01 1.876000e+00
    endloop
  endfacet
  facet normal -7.890242e-01 -5.980764e-01 -0.000000e+00
    outer loop
      vertex 2.932208e-01 2.720691e-01 1.876000e+00
      vertex 2.932208e-01 2.720691e-01 1.476000e+00
      vertex 3.603875e-01 1.735535e-01 1.476000e+00
    endloop
  endfacet
  facet normal -6.553679e-01 -7.421236e-01 -0.000000e+00
    outer loop
      vertex 2.000000e-01 3.464102e-01 1.876000e+00
      vertex 2.932208e-01 2.720691e-01 1.476000e+00
      vertex 2.932208e-01 2.720691e-01 1.876000e+00
    endloop
  endfacet
  facet normal -5.776840e-01 -8.040745e-01 -0.000000e+00
    outer loop
      vertex 2.000000e-01 3.464102e-01 1.876000e+00
      vertex 2.000000e-01 3.464102e-01 1.476000e+00
      vertex 2.932208e-01 2.720691e-01 1.476000e+00
    endloop
  endfacet
  facet normal -4.075070e-01 -9.023263e-01 -0.000000e+00
    outer loop
      vertex 8.900838e-02 3.899712e-01 1.876000e+00
      vertex 2.000000e-01 3.464102e-01 1.476000e+00
      vertex 2.000000e-01 3.464102e-01 1.876000e+00
    endloop
  endfacet
  facet normal -3.150140e-01 -9.386271e-01 -0.000000e+00
    outer loop
      vertex 8.900838e-02 3.899712e-01 1.876000e+00
      vertex 8.900838e-02 3.899712e-01 1.476000e+00
      vertex 2.000000e-01 3.464102e-01 1.476000e+00
    endloop
  endfacet
  facet normal -1.234373e-01 -9.823532e-01 -0.000000e+00
    outer loop
      vertex -2.989204e-02 3.988815e-01 1.876000e+00
      vertex 8.900838e-02 3.899712e-01 1.476000e+00
      vertex 8.900838e-02 3.899712e-01 1.876000e+00
    endloop
  endfacet
  facet normal -2.435358e-02 -9.897785e-01 -0.000000e+00
    outer loop
      vertex -2.989204e-02 3.988815e-01 1.876000e+00
      vertex -2.989204e-02 3.988815e-01 1.476000e+00
      vertex 8.900838e-02 3.899712e-01 1.476000e+00
    endloop
  endfacet
  facet normal 1.716004e-01 -9.750938e-01 -0.000000e+00
    outer loop
      vertex -1.461364e-01 3.723495e-01 1.876000e+00
      vertex -2.989204e-02 3.988815e-01 1.476000e+00
      vertex -2.989204e-02 3.988815e-01 1.876000e+00
    endloop
  endfacet
  facet normal 2.684707e-01 -9.529838e-01 -0.000000e+00
    outer loop
      vertex -1.461364e-01 3.723495e-01 1.876000e+00
      vertex -1.461364e-01 3.723495e-01 1.476000e+00
      vertex -2.989204e-02 3.988815e-01 1.476000e+00
    endloop
  endfacet
  facet normal 4.513906e-01 -8.811930e-01 -0.000000e+00
    outer loop
      vertex -2.493959e-01 3.127326e-01 1.876000e+00
      vertex -1.461364e-01 3.723495e-01 1.476000e+00
      vertex -1.461364e-01 3.723495e-01 1.876000e+00
    endloop
  endfacet
  facet normal 5.374402e-01 -8.315123e-01 -0.000000e+00
    outer loop
      vertex -2.493959e-01 3.127326e-01 1.876000e+00
      vertex -2.493959e-01 3.127326e-01 1.476000e+00
      vertex -1.461364e-01 3.723495e-01 1.476000e+00
    endloop
  endfacet
  facet normal 6.910728e-01 -7.089944e-01 -0.000000e+00
    outer loop
      vertex -3.304955e-01 2.253280e-01 1.876000e+00
      vertex -2.493959e-01 3.127326e-01 1.476000e+00
      vertex -2.493959e-01 3.127326e-01 1.876000e+00
    endloop
  endfacet
  facet normal 7.586558e-01 -6.361572e-01 -0.000000e+00
    outer loop
      vertex -3.304955e-01 2.253280e-01 1.876000e+00
      vertex -3.304955e-01 2.253280e-01 1.476000e+00
      vertex -2.493959e-01 3.127326e-01 1.476000e+00
    endloop
  endfacet
  facet normal 8.693501e-01 -4.737984e-01 -0.000000e+00
    outer loop
      vertex -3.822291e-01 1.179021e-01 1.876000e+00
      vertex -3.304955e-01 2.253280e-01 1.476000e+00
      vertex -3.304955e-01 2.253280e-01 1.876000e+00
    endloop
  endfacet
  facet normal 9.124615e-01 -3.842768e-01 -0.000000e+00
    outer loop
      vertex -3.822291e-01 1.179021e-01 1.876000e+00
      vertex -3.822291e-01 1.179021e-01 1.476000e+00
      vertex -3.304955e-01 2.253280e-01 1.476000e+00
    endloop
  endfacet
  facet normal 9.703819e-01 -1.965034e-01 0.000000e+00
    outer loop
      vertex -4.000000e-01 4.898587e-17 1.876000e+00
      vertex -3.822291e-01 1.179021e-01 1.476000e+00
      vertex -3.822291e-01 1.179021e-01 1.876000e+00
    endloop
  endfacet
  facet normal 9.851909e-01 -9.825172e-02 0.000000e+00
    outer loop
      vertex -4.000000e-01 4.898587e-17 1.876000e+00
      vertex -4.000000e-01 4.898587e-17 1.476000e+00
      vertex -3.822291e-01 1.179021e-01 1.476000e+00
    endloop
  endfacet
  facet normal 9.851909e-01 9.825172e-02 0.000000e+00
    outer loop
      vertex -3.822291e-01 -1.179021e-01 1.876000e+00
      vertex -4.000000e-01 4.898587e-17 1.476000e+00
      vertex -4.000000e-01 4.898587e-17 1.876000e+00
    endloop
  endfacet
  facet normal 0.000000e+00 0.000000e+00 1.000000e+00
    outer loop
      vertex -4.586602e+01 1.349108e+01 1.876000e+00
      vertex -4.586602e+01 1.967698e+01 1.876000e+00
      vertex -5.000000e+01 5.000000e+01 1.876000e+00
    endloop
  endfacet
  facet normal 0.000000e+00 0.000000e+00 1.000000e+00
    outer loop
      vertex 8.020000e+00 4.277099e+01 1.876000e+00
      vertex 9.752050e+00 4.277099e+01 1.876000e+00
      vertex 5.000000e+01 5.000000e+01 1.876000e+00
    endloop
  endfacet
  facet normal 0.000000e+00 0.000000e+00 1.000000e+00
    outer loop
      vertex 2.054047e+00 2.118908e+01 1.876000e+00
      vertex 3.219961e-01 2.118908e+01 1.876000e+00
      vertex 2.054047e+00 1.197897e+01 1.876000e+00
    endloop
  endfacet
  facet normal 0.000000e+00 0.000000e+00 1.000000e+00
    outer loop
      vertex -1.334196e+01 -4.809295e+01 1.876000e+00
      vertex -1.507401e+01 -4.809295e+01 1.876000e+00
      vertex -5.000000e+01 -5.000000e+01 1.876000e+00
    endloop
  endfacet
  facet normal 0.000000e+00 0.000000e+00 1.000000e+00
    outer loop
      vertex -4.586602e+01 -1.881304e+01 1.876000e+00
      vertex -4.413398e+01 -1.881304e+01 1.876000e+00
      vertex -4.586602e+01 -1.730093e+01 1.876000e+00
    endloop
  endfacet
  facet normal 0.000000e+00 0.000000e+00 1.000000e+00
    outer loop
      vertex -4.586602e+01 -2.499894e+01 1.876000e+00
      vertex -4.586602e+01 -1.881304e+01 1.876000e+00
      vertex -5.000000e+01 -5.000000e+01 1.876000e+00
    endloop
  endfacet
  facet normal 0.000000e+00 0.000000e+00 1.000000e+00
    outer loop
      vertex -1.507401e+01 5.793077e+00 1.876000e+00
      vertex -2.873797e+01 1.197897e+01 1.876000e+00
      vertex -2.873797e+01 5.793077e+00 1.876000e+00
    endloop
  endfacet
  facet normal 0.000000e+00 0.000000e+00 1.000000e+00
    outer loop
      vertex -1.507401e+01 1.197897e+01 1.876000e+00
      vertex -2.873797e+01 1.197897e+01 1.876000e+00
      vertex -1.507401e+01 5.793077e+00 1.876000e+00
    endloop
  endfacet
  facet normal 0.000000e+00 0.000000e+00 1.000000e+00
    outer loop
      vertex -4.413398e+01 1.197897e+01 1.876000e+00
      vertex -3.047002e+01 5.793077e+00 1.876000e+00
      vertex -3.047002e+01 1.197897e+01 1.876000e+00
    endloop
  endfacet
  facet normal 0.000000e+00 0.000000e+00 1.000000e+00
    outer loop
      vertex -4.413398e+01 5.793077e+00 1.876000e+00
      vertex -3.047002e+01 5.793077e+00 1.876000e+00
      vertex -4.413398e+01 1.197897e+01 1.876000e+00
    endloop
  endfacet
  facet normal 0.000000e+00 0.000000e+00 1.000000e+00
    outer loop
      vertex -4.413398e+01 -4.190705e+01 1.876000e+00
      vertex -4.413398e+01 -4.809295e+01 1.876000e+00
      vertex -3.047002e+01 -4.039494e+01 1.876000e+00
    endloop
  endfacet
  facet normal 0.000000e+00 0.000000e+00 1.000000e+00
    outer loop
      vertex -4.413398e+01 1.967698e+01 1.876000e+00
      vertex -3.047002e+01 1.349108e+01 1.876000e+00
      vertex -3.047002e+01 1.967698e+01 1.876000e+00
    endloop
  endfacet
  facet normal 0.000000e+00 0.000000e+00 1.000000e+00
    outer loop
      vertex -4.413398e+01 1.349108e+01 1.876000e+00
      vertex -3.047002e+01 1.349108e+01 1.876000e+00
      vertex -4.413398e+01 1.967698e+01 1.876000e+00
    endloop
  endfacet
  facet normal 0.000000e+00 0.000000e+00 1.000000e+00
    outer loop
      vertex -4.586602e+01 1.197897e+01 1.876000e+00
      vertex -5.000000e+01 5.000000e+01 1.876000e+00
      vertex -4.586602e+01 5.793077e+00 1.876000e+00
    endloop
  endfacet
  facet normal 0.000000e+00 0.000000e+00 1.000000e+00
    outer loop
      vertex -4.586602e+01 1.197897e+01 1.876000e+00
      vertex -4.586602e+01 1.349108e+01 1.876000e+00
      vertex -5.000000e+01 5.000000e+01 1.876000e+00
    endloop
  endfacet
  facet normal 0.000000e+00 0.000000e+00 1.000000e+00
    outer loop
      vertex -4.413398e+01 1.197897e+01 1.876000e+00
      vertex -4.586602e+01 1.349108e+01 1.876000e+00
      vertex -4.586602e+01 1.197897e+01 1.876000e+00
    endloop
  endfacet
  facet normal 0.000000e+00 0.000000e+00 1.000000e+00
    outer loop
      vertex -4.413398e+01 1.197897e+01 1.876000e+00
      vertex -4.413398e+01 1.349108e+01 1.876000e+00
      vertex -4.586602e+01 1.349108e+01 1.876000e+00
    endloop
  endfacet
  facet normal 0.000000e+00 0.000000e+00 1.000000e+00
    outer loop
      vertex -3.047002e+01 1.197897e+01 1.876000e+00
      vertex -4.413398e+01 1.349108e+01 1.876000e+00
      vertex -4.413398e+01 1.197897e+01 1.876000e+00
    endloop
  endfacet
  facet normal 0.000000e+00 0.000000e+00 1.000000e+00
    outer loop
      vertex -3.047002e+01 1.197897e+01 1.876000e+00
      vertex -3.047002e+01 1.349108e+01 1.876000e+00
      vertex -4.413398e+01 1.349108e+01 1.876000e+00
    endloop
  endfacet
  facet normal 0.000000e+00 0.000000e+00 1.000000e+00
    outer loop
      vertex -2.873797e+01 1.197897e+01 1.876000e+00
      vertex -3.047002e+01 1.349108e+01 1.876000e+00
      vertex -3.047002e+01 1.197897e+01 1.876000e+00
    endloop
  endfacet
  facet normal 0.000000e+00 0.000000e+00 1.000000e+00
    outer loop
      vertex -2.873797e+01 1.197897e+01 1.876000e+00
      vertex -2.873797e+01 1.349108e+01 1.876000e+00
      vertex -3.047002e+01 1.349108e+01 1.876000e+00
    endloop
  endfacet
  facet normal 0.000000e+00 0.000000e+00 1.000000e+00
    outer loop
      vertex -1.507401e+01 1.197897e+01 1.876000e+00
      vertex -2.873797e+01 1.349108e+01 1.876000e+00
      vertex -2.873797e+01 1.197897e+01 1.876000e+00
    endloop
  endfacet
  facet normal 0.000000e+00 0.000000e+00 1.000000e+00
    outer loop
      vertex -7.376008e+00 -3.269694e+01 1.876000e+00
      vertex -1.334196e+01 -2.651105e+01 1.876000e+00
      vertex -1.334196e+01 -3.269694e+01 1.876000e+00
    endloop
  endfacet
  facet normal 0.000000e+00 0.000000e+00 1.000000e+00
    outer loop
      vertex -7.376008e+00 -2.651105e+01 1.876000e+00
      vertex -1.334196e+01 -2.651105e+01 1.876000e+00
      vertex -7.376008e+00 -3.269694e+01 1.876000e+00
    endloop
  endfacet
  facet normal 0.000000e+00 0.000000e+00 1.000000e+00
    outer loop
      vertex -1.334196e+01 3.507298e+01 1.876000e+00
      vertex -1.334196e+01 2.888709e+01 1.876000e+00
      vertex -7.376008e+00 2.888709e+01 1.876000e+00
    endloop
  endfacet
  facet normal 0.000000e+00 0.000000e+00 1.000000e+00
    outer loop
      vertex -1.507401e+01 2.888709e+01 1.876000e+00
      vertex -1.507401e+01 3.507298e+01 1.876000e+00
      vertex -2.103996e+01 3.658509e+01 1.876000e+00
    endloop
  endfacet
  facet normal 0.000000e+00 0.000000e+00 1.000000e+00
    outer loop
      vertex -5.643957e+00 -1.111504e+01 1.876000e+00
      vertex -5.643957e+00 -1.730093e+01 1.876000e+00
      vertex 3.219961e-01 -1.881304e+01 1.876000e+00
    endloop
  endfacet
  facet normal 0.000000e+00 0.000000e+00 1.000000e+00
    outer loop
      vertex 8.020000e+00 -2.499894e+01 1.876000e+00
      vertex 2.054047e+00 -1.881304e+01 1.876000e+00
      vertex 2.054047e+00 -2.499894e+01 1.876000e+00
    endloop
  endfacet
  facet normal 0.000000e+00 0.000000e+00 1.000000e+00
    outer loop
      vertex 8.020000e+00 -1.881304e+01 1.876000e+00
      vertex 2.054047e+00 -1.881304e+01 1.876000e+00
      vertex 8.020000e+00 -2.499894e+01 1.876000e+00
    endloop
  endfacet
  facet normal 0.000000e+00 0.000000e+00 1.000000e+00
    outer loop
      vertex 2.054047e+00 3.658509e+01 1.876000e+00
      vertex 3.219961e-01 3.658509e+01 1.876000e+00
      vertex 2.054047e+00 2.737498e+01 1.876000e+00
    endloop
  endfacet
  facet normal 0.000000e+00 0.000000e+00 1.000000e+00
    outer loop
      vertex 8.020000e+00 -3.417034e+00 1.876000e+00
      vertex 9.752050e+00 -3.417034e+00 1.876000e+00
      vertex 8.020000e+00 -1.904926e+00 1.876000e+00
    endloop
  endfacet
  facet normal 0.000000e+00 0.000000e+00 1.000000e+00
    outer loop
      vertex 1.571800e+01 -4.039494e+01 1.876000e+00
      vertex 1.571800e+01 -3.420905e+01 1.876000e+00
      vertex 9.752050e+00 -3.420905e+01 1.876000e+00
    endloop
  endfacet
  facet normal 0.000000e+00 0.000000e+00 1.000000e+00
    outer loop
      vertex 3.111401e+01 -4.190705e+01 1.876000e+00
      vertex 3.284606e+01 -3.269694e+01 1.876000e+00
      vertex 3.111401e+01 -3.269694e+01 1.876000e+00
    endloop
  endfacet
  facet normal 0.000000e+00 0.000000e+00 1.000000e+00
    outer loop
      vertex 3.284606e+01 -4.190705e+01 1.876000e+00
      vertex 3.284606e+01 -3.269694e+01 1.876000e+00
      vertex 3.111401e+01 -4.190705e+01 1.876000e+00
    endloop
  endfacet
  facet normal 0.000000e+00 0.000000e+00 1.000000e+00
    outer loop
      vertex 3.881202e+01 -3.420905e+01 1.876000e+00
      vertex 4.054406e+01 -3.420905e+01 1.876000e+00
      vertex 3.284606e+01 -2.651105e+01 1.876000e+00
    endloop
  endfacet
  facet normal 0.000000e+00 0.000000e+00 1.000000e+00
    outer loop
      vertex 4.054406e+01 1.197897e+01 1.876000e+00
      vertex 4.054406e+01 5.793077e+00 1.876000e+00
      vertex 5.000000e+01 5.000000e+01 1.876000e+00
    endloop
  endfacet
  facet normal 0.000000e+00 0.000000e+00 1.000000e+00
    outer loop
      vertex 4.054406e+01 4.280970e+00 1.876000e+00
      vertex 3.881202e+01 5.793077e+00 1.876000e+00
      vertex 3.881202e+01 4.280970e+00 1.876000e+00
    endloop
  endfacet
  facet normal 0.000000e+00 0.000000e+00 1.000000e+00
    outer loop
      vertex 4.054406e+01 5.793077e+00 1.876000e+00
      vertex 3.881202e+01 5.793077e+00 1.876000e+00
      vertex 4.054406e+01 4.280970e+00 1.876000e+00
    endloop
  endfacet
  facet normal 0.000000e+00 0.000000e+00 1.000000e+00
    outer loop
      vertex -4.413398e+01 1.967698e+01 1.876000e+00
      vertex -4.586602e+01 2.118908e+01 1.876000e+00
      vertex -4.586602e+01 1.967698e+01 1.876000e+00
    endloop
  endfacet
  facet normal 0.000000e+00 0.000000e+00 1.000000e+00
    outer loop
      vertex -4.413398e+01 1.967698e+01 1.876000e+00
      vertex -4.413398e+01 2.118908e+01 1.876000e+00
      vertex -4.586602e+01 2.118908e+01 1.876000e+00
    endloop
  endfacet
  facet normal 0.000000e+00 0.000000e+00 1.000000e+00
    outer loop
      vertex -3.047002e+01 1.967698e+01 1.876000e+00
      vertex -4.413398e+01 2.118908e+01 1.876000e+00
      vertex -4.413398e+01 1.967698e+01 1.876000e+00
    endloop
  endfacet
  facet normal 0.000000e+00 0.000000e+00 1.000000e+00
    outer loop
      vertex 3.881202e+01 -1.904926e+00 1.876000e+00
      vertex 4.054406e+01 -3.417034e+00 1.876000e+00
      vertex 4.054406e+01 -1.904926e+00 1.876000e+00
    endloop
  endfacet
  facet normal 0.000000e+00 0.000000e+00 1.000000e+00
    outer loop
      vertex 3.881202e+01 -3.417034e+00 1.876000e+00
      vertex 4.054406e+01 -3.417034e+00 1.876000e+00
      vertex 3.881202e+01 -1.904926e+00 1.876000e+00
    endloop
  endfacet
  facet normal 0.000000e+00 0.000000e+00 1.000000e+00
    outer loop
      vertex 2.341601e+01 -3.269694e+01 1.876000e+00
      vertex 2.341601e+01 -2.651105e+01 1.876000e+00
      vertex 1.745005e+01 -3.420905e+01 1.876000e+00
    endloop
  endfacet
  facet normal 0.000000e+00 0.000000e+00 1.000000e+00
    outer loop
      vertex 1.745005e+01 -4.039494e+01 1.876000e+00
      vertex 2.341601e+01 -3.269694e+01 1.876000e+00
      vertex 1.745005e+01 -3.420905e+01 1.876000e+00
    endloop
  endfacet
  facet normal 0.000000e+00 0.000000e+00 1.000000e+00
    outer loop
      vertex 2.514806e+01 -3.269694e+01 1.876000e+00
      vertex 2.341601e+01 -3.269694e+01 1.876000e+00
      vertex 1.745005e+01 -4.039494e+01 1.876000e+00
    endloop
  endfacet
  facet normal 0.000000e+00 0.000000e+00 1.000000e+00
    outer loop
      vertex 2.341601e+01 -9.602930e+00 1.876000e+00
      vertex 1.745005e+01 -1.730093e+01 1.876000e+00
      vertex 2.514806e+01 -9.602930e+00 1.876000e+00
    endloop
  endfacet
  facet normal 0.000000e+00 0.000000e+00 1.000000e+00
    outer loop
      vertex 1.745005e+01 -1.111504e+01 1.876000e+00
      vertex 1.745005e+01 -1.730093e+01 1.876000e+00
      vertex 2.341601e+01 -9.602930e+00 1.876000e+00
    endloop
  endfacet
  facet normal 0.000000e+00 0.000000e+00 1.000000e+00
    outer loop
      vertex 2.341601e+01 -3.417034e+00 1.876000e+00
      vertex 1.745005e+01 -1.111504e+01 1.876000e+00
      vertex 2.341601e+01 -9.602930e+00 1.876000e+00
    endloop
  endfacet
  facet normal 0.000000e+00 0.000000e+00 1.000000e+00
    outer loop
      vertex 9.752050e+00 -3.417034e+00 1.876000e+00
      vertex 1.745005e+01 -1.111504e+01 1.876000e+00
      vertex 2.341601e+01 -3.417034e+00 1.876000e+00
    endloop
  endfacet
  facet normal 0.000000e+00 0.000000e+00 1.000000e+00
    outer loop
      vertex 9.752050e+00 -3.417034e+00 1.876000e+00
      vertex 1.571800e+01 -1.111504e+01 1.876000e+00
      vertex 1.745005e+01 -1.111504e+01 1.876000e+00
    endloop
  endfacet
  facet normal 0.000000e+00 0.000000e+00 1.000000e+00
    outer loop
      vertex 9.752050e+00 -9.602930e+00 1.876000e+00
      vertex 1.571800e+01 -1.111504e+01 1.876000e+00
      vertex 9.752050e+00 -3.417034e+00 1.876000e+00
    endloop
  endfacet
  facet normal 0.000000e+00 0.000000e+00 1.000000e+00
    outer loop
      vertex 8.020000e+00 3.658509e+01 1.876000e+00
      vertex 9.752050e+00 2.737498e+01 1.876000e+00
      vertex 9.752050e+00 3.658509e+01 1.876000e+00
    endloop
  endfacet
  facet normal 0.000000e+00 0.000000e+00 1.000000e+00
    outer loop
      vertex 8.020000e+00 2.737498e+01 1.876000e+00
      vertex 9.752050e+00 2.737498e+01 1.876000e+00
      vertex 8.020000e+00 3.658509e+01 1.876000e+00
    endloop
  endfacet
  facet normal 0.000000e+00 0.000000e+00 1.000000e+00
    outer loop
      vertex 2.054047e+00 3.658509e+01 1.876000e+00
      vertex 8.020000e+00 3.658509e+01 1.876000e+00
      vertex 2.054047e+00 4.277099e+01 1.876000e+00
    endloop
  endfacet
  facet normal 0.000000e+00 0.000000e+00 1.000000e+00
    outer loop
      vertex 2.054047e+00 3.658509e+01 1.876000e+00
      vertex 8.020000e+00 2.737498e+01 1.876000e+00
      vertex 8.020000e+00 3.658509e+01 1.876000e+00
    endloop
  endfacet
  facet normal 0.000000e+00 0.000000e+00 1.000000e+00
    outer loop
      vertex 2.054047e+00 2.737498e+01 1.876000e+00
      vertex 8.020000e+00 2.737498e+01 1.876000e+00
      vertex 2.054047e+00 3.658509e+01 1.876000e+00
    endloop
  endfacet
  facet normal 0.000000e+00 0.000000e+00 1.000000e+00
    outer loop
      vertex 2.054047e+00 2.737498e+01 1.876000e+00
      vertex 8.020000e+00 2.118908e+01 1.876000e+00
      vertex 8.020000e+00 2.737498e+01 1.876000e+00
    endloop
  endfacet
  facet normal 0.000000e+00 0.000000e+00 1.000000e+00
    outer loop
      vertex 2.054047e+00 2.118908e+01 1.876000e+00
      vertex 8.020000e+00 2.118908e+01 1.876000e+00
      vertex 2.054047e+00 2.737498e+01 1.876000e+00
    endloop
  endfacet
  facet normal 0.000000e+00 0.000000e+00 1.000000e+00
    outer loop
      vertex 3.881202e+01 3.658509e+01 1.876000e+00
      vertex 3.284606e+01 2.737498e+01 1.876000e+00
      vertex 4.054406e+01 3.658509e+01 1.876000e+00
    endloop
  endfacet
  facet normal 0.000000e+00 0.000000e+00 1.000000e+00
    outer loop
      vertex 2.514806e+01 3.507298e+01 1.876000e+00
      vertex 3.284606e+01 2.737498e+01 1.876000e+00
      vertex 3.881202e+01 3.658509e+01 1.876000e+00
    endloop
  endfacet
  facet normal 0.000000e+00 0.000000e+00 1.000000e+00
    outer loop
      vertex 2.514806e+01 3.507298e+01 1.876000e+00
      vertex 3.111401e+01 2.737498e+01 1.876000e+00
      vertex 3.284606e+01 2.737498e+01 1.876000e+00
    endloop
  endfacet
  facet normal 0.000000e+00 0.000000e+00 1.000000e+00
    outer loop
      vertex 2.514806e+01 2.888709e+01 1.876000e+00
      vertex 3.111401e+01 2.737498e+01 1.876000e+00
      vertex 2.514806e+01 3.507298e+01 1.876000e+00
    endloop
  endfacet
  facet normal 0.000000e+00 0.000000e+00 1.000000e+00
    outer loop
      vertex 2.514806e+01 2.888709e+01 1.876000e+00
      vertex 3.111401e+01 2.118908e+01 1.876000e+00
      vertex 3.111401e+01 2.737498e+01 1.876000e+00
    endloop
  endfacet
  facet normal 0.000000e+00 0.000000e+00 1.000000e+00
    outer loop
      vertex 2.341601e+01 2.888709e+01 1.876000e+00
      vertex 3.111401e+01 2.118908e+01 1.876000e+00
      vertex 2.514806e+01 2.888709e+01 1.876000e+00
    endloop
  endfacet
  facet normal 0.000000e+00 0.000000e+00 1.000000e+00
    outer loop
      vertex 2.341601e+01 2.888709e+01 1.876000e+00
      vertex 1.745005e+01 1.967698e+01 1.876000e+00
      vertex 3.111401e+01 2.118908e+01 1.876000e+00
    endloop
  endfacet
  facet normal 0.000000e+00 0.000000e+00 1.000000e+00
    outer loop
      vertex 9.752050e+00 2.737498e+01 1.876000e+00
      vertex 1.745005e+01 1.967698e+01 1.876000e+00
      vertex 2.341601e+01 2.888709e+01 1.876000e+00
    endloop
  endfacet
  facet normal 0.000000e+00 0.000000e+00 1.000000e+00
    outer loop
      vertex 9.752050e+00 2.737498e+01 1.876000e+00
      vertex 1.571800e+01 1.967698e+01 1.876000e+00
      vertex 1.745005e+01 1.967698e+01 1.876000e+00
    endloop
  endfacet
  facet normal 0.000000e+00 0.000000e+00 1.000000e+00
    outer loop
      vertex 9.752050e+00 2.118908e+01 1.876000e+00
      vertex 1.571800e+01 1.967698e+01 1.876000e+00
      vertex 9.752050e+00 2.737498e+01 1.876000e+00
    endloop
  endfacet
  facet normal 0.000000e+00 0.000000e+00 1.000000e+00
    outer loop
      vertex 9.752050e+00 2.118908e+01 1.876000e+00
      vertex 1.571800e+01 1.349108e+01 1.876000e+00
      vertex 1.571800e+01 1.967698e+01 1.876000e+00
    endloop
  endfacet
  facet normal 0.000000e+00 0.000000e+00 1.000000e+00
    outer loop
      vertex 8.020000e+00 2.118908e+01 1.876000e+00
      vertex 1.571800e+01 1.349108e+01 1.876000e+00
      vertex 9.752050e+00 2.118908e+01 1.876000e+00
    endloop
  endfacet
  facet normal 0.000000e+00 0.000000e+00 1.000000e+00
    outer loop
      vertex 8.020000e+00 2.118908e+01 1.876000e+00
      vertex 2.054047e+00 1.197897e+01 1.876000e+00
      vertex 1.571800e+01 1.349108e+01 1.876000e+00
    endloop
  endfacet
  facet normal 0.000000e+00 0.000000e+00 1.000000e+00
    outer loop
      vertex 2.054047e+00 2.118908e+01 1.876000e+00
      vertex 2.054047e+00 1.197897e+01 1.876000e+00
      vertex 8.020000e+00 2.118908e+01 1.876000e+00
    endloop
  endfacet
  facet normal 0.000000e+00 0.000000e+00 1.000000e+00
    outer loop
      vertex -5.643957e+00 -4.809295e+01 1.876000e+00
      vertex 9.752050e+00 -4.039494e+01 1.876000e+00
      vertex 8.020000e+00 -4.039494e+01 1.876000e+00
    endloop
  endfacet
  facet normal 0.000000e+00 0.000000e+00 1.000000e+00
    outer loop
      vertex 3.111401e+01 -4.809295e+01 1.876000e+00
      vertex 9.752050e+00 -4.039494e+01 1.876000e+00
      vertex -5.643957e+00 -4.809295e+01 1.876000e+00
    endloop
  endfacet
  facet normal 0.000000e+00 0.000000e+00 1.000000e+00
    outer loop
      vertex 3.219961e-01 5.793077e+00 1.876000e+00
      vertex 3.219961e-01 1.197897e+01 1.876000e+00
      vertex -5.643957e+00 1.349108e+01 1.876000e+00
    endloop
  endfacet
  facet normal 0.000000e+00 0.000000e+00 1.000000e+00
    outer loop
      vertex 3.219961e-01 2.737498e+01 1.876000e+00
      vertex -5.643957e+00 2.888709e+01 1.876000e+00
      vertex 3.219961e-01 2.118908e+01 1.876000e+00
    endloop
  endfacet
  facet normal 0.000000e+00 0.000000e+00 1.000000e+00
    outer loop
      vertex -5.643957e+00 3.507298e+01 1.876000e+00
      vertex -5.643957e+00 2.888709e+01 1.876000e+00
      vertex 3.219961e-01 2.737498e+01 1.876000e+00
    endloop
  endfacet
  facet normal 0.000000e+00 0.000000e+00 1.000000e+00
    outer loop
      vertex 3.219961e-01 3.658509e+01 1.876000e+00
      vertex 3.219961e-01 2.737498e+01 1.876000e+00
      vertex 2.054047e+00 2.737498e+01 1.876000e+00
    endloop
  endfacet
  facet normal 0.000000e+00 0.000000e+00 1.000000e+00
    outer loop
      vertex 3.219961e-01 3.658509e+01 1.876000e+00
      vertex -5.643957e+00 3.507298e+01 1.876000e+00
      vertex 3.219961e-01 2.737498e+01 1.876000e+00
    endloop
  endfacet
  facet normal 0.000000e+00 0.000000e+00 1.000000e+00
    outer loop
      vertex 3.219961e-01 4.277099e+01 1.876000e+00
      vertex -5.643957e+00 3.507298e+01 1.876000e+00
      vertex 3.219961e-01 3.658509e+01 1.876000e+00
    endloop
  endfacet
  facet normal 0.000000e+00 0.000000e+00 1.000000e+00
    outer loop
      vertex 3.219961e-01 4.277099e+01 1.876000e+00
      vertex -7.376008e+00 3.507298e+01 1.876000e+00
      vertex -5.643957e+00 3.507298e+01 1.876000e+00
    endloop
  endfacet
  facet normal 0.000000e+00 0.000000e+00 1.000000e+00
    outer loop
      vertex -2.103996e+01 4.277099e+01 1.876000e+00
      vertex -7.376008e+00 3.507298e+01 1.876000e+00
      vertex 3.219961e-01 4.277099e+01 1.876000e+00
    endloop
  endfacet
  facet normal 0.000000e+00 0.000000e+00 1.000000e+00
    outer loop
      vertex -4.413398e+01 -1.111504e+01 1.876000e+00
      vertex -3.047002e+01 -1.730093e+01 1.876000e+00
      vertex -3.047002e+01 -1.111504e+01 1.876000e+00
    endloop
  endfacet
  facet normal 0.000000e+00 0.000000e+00 1.000000e+00
    outer loop
      vertex -4.413398e+01 -1.730093e+01 1.876000e+00
      vertex -3.047002e+01 -1.730093e+01 1.876000e+00
      vertex -4.413398e+01 -1.111504e+01 1.876000e+00
    endloop
  endfacet
  facet normal 0.000000e+00 0.000000e+00 1.000000e+00
    outer loop
      vertex -4.413398e+01 -1.730093e+01 1.876000e+00
      vertex -4.413398e+01 -1.881304e+01 1.876000e+00
      vertex -3.047002e+01 -1.730093e+01 1.876000e+00
    endloop
  endfacet
  facet normal 0.000000e+00 0.000000e+00 1.000000e+00
    outer loop
      vertex -4.586602e+01 -1.730093e+01 1.876000e+00
      vertex -4.413398e+01 -1.881304e+01 1.876000e+00
      vertex -4.413398e+01 -1.730093e+01 1.876000e+00
    endloop
  endfacet
  facet normal 0.000000e+00 0.000000e+00 1.000000e+00
    outer loop
      vertex -7.376008e+00 3.507298e+01 1.876000e+00
      vertex -1.334196e+01 3.507298e+01 1.876000e+00
      vertex -7.376008e+00 2.888709e+01 1.876000e+00
    endloop
  endfacet
  facet normal 0.000000e+00 0.000000e+00 1.000000e+00
    outer loop
      vertex -2.103996e+01 4.277099e+01 1.876000e+00
      vertex -1.334196e+01 3.507298e+01 1.876000e+00
      vertex -7.376008e+00 3.507298e+01 1.876000e+00
    endloop
  endfacet
  facet normal 0.000000e+00 0.000000e+00 1.000000e+00
    outer loop
      vertex -2.103996e+01 4.277099e+01 1.876000e+00
      vertex -1.507401e+01 3.507298e+01 1.876000e+00
      vertex -1.334196e+01 3.507298e+01 1.876000e+00
    endloop
  endfacet
  facet normal 0.000000e+00 0.000000e+00 1.000000e+00
    outer loop
      vertex -2.103996e+01 3.658509e+01 1.876000e+00
      vertex -1.507401e+01 3.507298e+01 1.876000e+00
      vertex -2.103996e+01 4.277099e+01 1.876000e+00
    endloop
  endfacet
  facet normal 0.000000e+00 0.000000e+00 1.000000e+00
    outer loop
      vertex -2.873797e+01 -3.420905e+01 1.876000e+00
      vertex -2.103996e+01 -4.190705e+01 1.876000e+00
      vertex -1.507401e+01 -3.269694e+01 1.876000e+00
    endloop
  endfacet
  facet normal 0.000000e+00 0.000000e+00 1.000000e+00
    outer loop
      vertex -2.873797e+01 -3.420905e+01 1.876000e+00
      vertex -2.277201e+01 -4.190705e+01 1.876000e+00
      vertex -2.103996e+01 -4.190705e+01 1.876000e+00
    endloop
  endfacet
  facet normal 0.000000e+00 0.000000e+00 1.000000e+00
    outer loop
      vertex -2.873797e+01 -4.039494e+01 1.876000e+00
      vertex -2.277201e+01 -4.190705e+01 1.876000e+00
      vertex -2.873797e+01 -3.420905e+01 1.876000e+00
    endloop
  endfacet
  facet normal 0.000000e+00 0.000000e+00 1.000000e+00
    outer loop
      vertex -2.873797e+01 -4.039494e+01 1.876000e+00
      vertex -2.277201e+01 -4.809295e+01 1.876000e+00
      vertex -2.277201e+01 -4.190705e+01 1.876000e+00
    endloop
  endfacet
  facet normal 0.000000e+00 0.000000e+00 1.000000e+00
    outer loop
      vertex -3.047002e+01 -4.039494e+01 1.876000e+00
      vertex -2.277201e+01 -4.809295e+01 1.876000e+00
      vertex -2.873797e+01 -4.039494e+01 1.876000e+00
    endloop
  endfacet
  facet normal 0.000000e+00 0.000000e+00 1.000000e+00
    outer loop
      vertex -1.507401e+01 -3.269694e+01 1.876000e+00
      vertex -1.507401e+01 -4.190705e+01 1.876000e+00
      vertex -1.334196e+01 -4.190705e+01 1.876000e+00
    endloop
  endfacet
  facet normal 0.000000e+00 0.000000e+00 1.000000e+00
    outer loop
      vertex -2.103996e+01 -4.190705e+01 1.876000e+00
      vertex -1.507401e+01 -4.190705e+01 1.876000e+00
      vertex -1.507401e+01 -3.269694e+01 1.876000e+00
    endloop
  endfacet
  facet normal 0.000000e+00 0.000000e+00 1.000000e+00
    outer loop
      vertex -2.103996e+01 -4.190705e+01 1.876000e+00
      vertex -1.507401e+01 -4.809295e+01 1.876000e+00
      vertex -1.507401e+01 -4.190705e+01 1.876000e+00
    endloop
  endfacet
  facet normal 0.000000e+00 0.000000e+00 1.000000e+00
    outer loop
      vertex -2.103996e+01 -4.809295e+01 1.876000e+00
      vertex -1.507401e+01 -4.809295e+01 1.876000e+00
      vertex -2.103996e+01 -4.190705e+01 1.876000e+00
    endloop
  endfacet
  facet normal 0.000000e+00 0.000000e+00 1.000000e+00
    outer loop
      vertex -2.103996e+01 -4.809295e+01 1.876000e+00
      vertex -5.000000e+01 -5.000000e+01 1.876000e+00
      vertex -1.507401e+01 -4.809295e+01 1.876000e+00
    endloop
  endfacet
  facet normal 0.000000e+00 0.000000e+00 1.000000e+00
    outer loop
      vertex -2.277201e+01 -4.809295e+01 1.876000e+00
      vertex -5.000000e+01 -5.000000e+01 1.876000e+00
      vertex -2.103996e+01 -4.809295e+01 1.876000e+00
    endloop
  endfacet
  facet normal 0.000000e+00 0.000000e+00 1.000000e+00
    outer loop
      vertex -2.277201e+01 -4.809295e+01 1.876000e+00
      vertex -4.413398e+01 -4.809295e+01 1.876000e+00
      vertex -5.000000e+01 -5.000000e+01 1.876000e+00
    endloop
  endfacet
  facet normal 0.000000e+00 0.000000e+00 1.000000e+00
    outer loop
      vertex -3.047002e+01 -4.039494e+01 1.876000e+00
      vertex -4.413398e+01 -4.809295e+01 1.876000e+00
      vertex -2.277201e+01 -4.809295e+01 1.876000e+00
    endloop
  endfacet
  facet normal 0.000000e+00 0.000000e+00 1.000000e+00
    outer loop
      vertex 3.219961e-01 -1.881304e+01 1.876000e+00
      vertex -5.643957e+00 -2.651105e+01 1.876000e+00
      vertex 3.219961e-01 -2.499894e+01 1.876000e+00
    endloop
  endfacet
  facet normal 0.000000e+00 0.000000e+00 1.000000e+00
    outer loop
      vertex -5.643957e+00 -1.730093e+01 1.876000e+00
      vertex -5.643957e+00 -2.651105e+01 1.876000e+00
      vertex 3.219961e-01 -1.881304e+01 1.876000e+00
    endloop
  endfacet
  facet normal 0.000000e+00 0.000000e+00 1.000000e+00
    outer loop
      vertex -5.643957e+00 -1.730093e+01 1.876000e+00
      vertex -7.376008e+00 -2.651105e+01 1.876000e+00
      vertex -5.643957e+00 -2.651105e+01 1.876000e+00
    endloop
  endfacet
  facet normal 0.000000e+00 0.000000e+00 1.000000e+00
    outer loop
      vertex -7.376008e+00 -1.730093e+01 1.876000e+00
      vertex -7.376008e+00 -2.651105e+01 1.876000e+00
      vertex -5.643957e+00 -1.730093e+01 1.876000e+00
    endloop
  endfacet
  facet normal 0.000000e+00 0.000000e+00 1.000000e+00
    outer loop
      vertex -7.376008e+00 -1.730093e+01 1.876000e+00
      vertex -1.334196e+01 -2.651105e+01 1.876000e+00
      vertex -7.376008e+00 -2.651105e+01 1.876000e+00
    endloop
  endfacet
  facet normal 0.000000e+00 0.000000e+00 1.000000e+00
    outer loop
      vertex -2.103996e+01 -1.881304e+01 1.876000e+00
      vertex -1.334196e+01 -2.651105e+01 1.876000e+00
      vertex -7.376008e+00 -1.730093e+01 1.876000e+00
    endloop
  endfacet
  facet normal 0.000000e+00 0.000000e+00 1.000000e+00
    outer loop
      vertex -2.103996e+01 -1.881304e+01 1.876000e+00
      vertex -1.507401e+01 -2.651105e+01 1.876000e+00
      vertex -1.334196e+01 -2.651105e+01 1.876000e+00
    endloop
  endfacet
  facet normal 0.000000e+00 0.000000e+00 1.000000e+00
    outer loop
      vertex -2.103996e+01 -2.499894e+01 1.876000e+00
      vertex -1.507401e+01 -2.651105e+01 1.876000e+00
      vertex -2.103996e+01 -1.881304e+01 1.876000e+00
    endloop
  endfacet
  facet normal 0.000000e+00 0.000000e+00 1.000000e+00
    outer loop
      vertex -2.103996e+01 -2.499894e+01 1.876000e+00
      vertex -1.507401e+01 -3.269694e+01 1.876000e+00
      vertex -1.507401e+01 -2.651105e+01 1.876000e+00
    endloop
  endfacet
  facet normal 0.000000e+00 0.000000e+00 1.000000e+00
    outer loop
      vertex -2.277201e+01 -2.499894e+01 1.876000e+00
      vertex -1.507401e+01 -3.269694e+01 1.876000e+00
      vertex -2.103996e+01 -2.499894e+01 1.876000e+00
    endloop
  endfacet
  facet normal 0.000000e+00 0.000000e+00 1.000000e+00
    outer loop
      vertex -2.277201e+01 -2.499894e+01 1.876000e+00
      vertex -2.873797e+01 -3.420905e+01 1.876000e+00
      vertex -1.507401e+01 -3.269694e+01 1.876000e+00
    endloop
  endfacet
  facet normal 0.000000e+00 0.000000e+00 1.000000e+00
    outer loop
      vertex -3.643597e+01 -2.651105e+01 1.876000e+00
      vertex -2.873797e+01 -3.420905e+01 1.876000e+00
      vertex -2.277201e+01 -2.499894e+01 1.876000e+00
    endloop
  endfacet
  facet normal 0.000000e+00 0.000000e+00 1.000000e+00
    outer loop
      vertex -3.643597e+01 -2.651105e+01 1.876000e+00
      vertex -3.047002e+01 -3.420905e+01 1.876000e+00
      vertex -2.873797e+01 -3.420905e+01 1.876000e+00
    endloop
  endfacet
  facet normal 0.000000e+00 0.000000e+00 1.000000e+00
    outer loop
      vertex -3.643597e+01 -3.269694e+01 1.876000e+00
      vertex -3.047002e+01 -3.420905e+01 1.876000e+00
      vertex -3.643597e+01 -2.651105e+01 1.876000e+00
    endloop
  endfacet
  facet normal 0.000000e+00 0.000000e+00 1.000000e+00
    outer loop
      vertex -3.643597e+01 -3.269694e+01 1.876000e+00
      vertex -3.047002e+01 -4.039494e+01 1.876000e+00
      vertex -3.047002e+01 -3.420905e+01 1.876000e+00
    endloop
  endfacet
  facet normal 0.000000e+00 0.000000e+00 1.000000e+00
    outer loop
      vertex -3.816802e+01 -3.269694e+01 1.876000e+00
      vertex -3.047002e+01 -4.039494e+01 1.876000e+00
      vertex -3.643597e+01 -3.269694e+01 1.876000e+00
    endloop
  endfacet
  facet normal 0.000000e+00 0.000000e+00 1.000000e+00
    outer loop
      vertex -3.816802e+01 -3.269694e+01 1.876000e+00
      vertex -4.413398e+01 -4.190705e+01 1.876000e+00
      vertex -3.047002e+01 -4.039494e+01 1.876000e+00
    endloop
  endfacet
  facet normal 0.000000e+00 0.000000e+00 1.000000e+00
    outer loop
      vertex -4.586602e+01 -4.190705e+01 1.876000e+00
      vertex -4.413398e+01 -4.190705e+01 1.876000e+00
      vertex -3.816802e+01 -3.269694e+01 1.876000e+00
    endloop
  endfacet
  facet normal 0.000000e+00 0.000000e+00 1.000000e+00
    outer loop
      vertex -3.047002e+01 -1.904926e+00 1.876000e+00
      vertex -2.873797e+01 -3.417034e+00 1.876000e+00
      vertex -2.873797e+01 -1.904926e+00 1.876000e+00
    endloop
  endfacet
  facet normal 0.000000e+00 0.000000e+00 1.000000e+00
    outer loop
      vertex -3.047002e+01 -3.417034e+00 1.876000e+00
      vertex -2.873797e+01 -3.417034e+00 1.876000e+00
      vertex -3.047002e+01 -1.904926e+00 1.876000e+00
    endloop
  endfacet
  facet normal 0.000000e+00 0.000000e+00 1.000000e+00
    outer loop
      vertex -2.277201e+01 3.658509e+01 1.876000e+00
      vertex -2.873797e+01 4.277099e+01 1.876000e+00
      vertex -2.873797e+01 3.658509e+01 1.876000e+00
    endloop
  endfacet
  facet normal 0.000000e+00 0.000000e+00 1.000000e+00
    outer loop
      vertex -2.277201e+01 4.277099e+01 1.876000e+00
      vertex -2.873797e+01 4.277099e+01 1.876000e+00
      vertex -2.277201e+01 3.658509e+01 1.876000e+00
    endloop
  endfacet
  facet normal 0.000000e+00 0.000000e+00 1.000000e+00
    outer loop
      vertex -5.000000e+01 5.000000e+01 1.876000e+00
      vertex -2.873797e+01 4.277099e+01 1.876000e+00
      vertex -2.277201e+01 4.277099e+01 1.876000e+00
    endloop
  endfacet
  facet normal 0.000000e+00 0.000000e+00 1.000000e+00
    outer loop
      vertex -3.047002e+01 4.277099e+01 1.876000e+00
      vertex -2.873797e+01 4.277099e+01 1.876000e+00
      vertex -5.000000e+01 5.000000e+01 1.876000e+00
    endloop
  endfacet
  facet normal 0.000000e+00 0.000000e+00 1.000000e+00
    outer loop
      vertex -3.643597e+01 2.888709e+01 1.876000e+00
      vertex -3.047002e+01 3.658509e+01 1.876000e+00
      vertex -3.643597e+01 3.507298e+01 1.876000e+00
    endloop
  endfacet
  facet normal 0.000000e+00 0.000000e+00 1.000000e+00
    outer loop
      vertex -3.643597e+01 2.888709e+01 1.876000e+00
      vertex -2.873797e+01 3.658509e+01 1.876000e+00
      vertex -3.047002e+01 3.658509e+01 1.876000e+00
    endloop
  endfacet
  facet normal 0.000000e+00 0.000000e+00 1.000000e+00
    outer loop
      vertex -2.277201e+01 2.737498e+01 1.876000e+00
      vertex -2.873797e+01 3.658509e+01 1.876000e+00
      vertex -3.643597e+01 2.888709e+01 1.876000e+00
    endloop
  endfacet
  facet normal 0.000000e+00 0.000000e+00 1.000000e+00
    outer loop
      vertex -2.277201e+01 2.737498e+01 1.876000e+00
      vertex -2.277201e+01 3.658509e+01 1.876000e+00
      vertex -2.873797e+01 3.658509e+01 1.876000e+00
    endloop
  endfacet
  facet normal 0.000000e+00 0.000000e+00 1.000000e+00
    outer loop
      vertex -2.103996e+01 2.737498e+01 1.876000e+00
      vertex -2.277201e+01 3.658509e+01 1.876000e+00
      vertex -2.277201e+01 2.737498e+01 1.876000e+00
    endloop
  endfacet
  facet normal 0.000000e+00 0.000000e+00 1.000000e+00
    outer loop
      vertex -1.507401e+01 -1.904926e+00 1.876000e+00
      vertex -1.334196e+01 -3.417034e+00 1.876000e+00
      vertex -1.334196e+01 -1.904926e+00 1.876000e+00
    endloop
  endfacet
  facet normal 0.000000e+00 0.000000e+00 1.000000e+00
    outer loop
      vertex -1.507401e+01 -3.417034e+00 1.876000e+00
      vertex -1.334196e+01 -3.417034e+00 1.876000e+00
      vertex -1.507401e+01 -1.904926e+00 1.876000e+00
    endloop
  endfacet
  facet normal 0.000000e+00 0.000000e+00 1.000000e+00
    outer loop
      vertex 2.054047e+00 -3.420905e+01 1.876000e+00
      vertex 8.020000e+00 -4.039494e+01 1.876000e+00
      vertex 8.020000e+00 -3.420905e+01 1.876000e+00
    endloop
  endfacet
  facet normal 0.000000e+00 0.000000e+00 1.000000e+00
    outer loop
      vertex 2.054047e+00 -4.039494e+01 1.876000e+00
      vertex 8.020000e+00 -4.039494e+01 1.876000e+00
      vertex 2.054047e+00 -3.420905e+01 1.876000e+00
    endloop
  endfacet
  facet normal 0.000000e+00 0.000000e+00 1.000000e+00
    outer loop
      vertex 2.054047e+00 -4.039494e+01 1.876000e+00
      vertex -5.643957e+00 -4.809295e+01 1.876000e+00
      vertex 8.020000e+00 -4.039494e+01 1.876000e+00
    endloop
  endfacet
  facet normal 0.000000e+00 0.000000e+00 1.000000e+00
    outer loop
      vertex 3.219961e-01 -4.039494e+01 1.876000e+00
      vertex -5.643957e+00 -4.809295e+01 1.876000e+00
      vertex 2.054047e+00 -4.039494e+01 1.876000e+00
    endloop
  endfacet
  facet normal 0.000000e+00 0.000000e+00 1.000000e+00
    outer loop
      vertex 3.219961e-01 -4.039494e+01 1.876000e+00
      vertex -5.643957e+00 -4.190705e+01 1.876000e+00
      vertex -5.643957e+00 -4.809295e+01 1.876000e+00
    endloop
  endfacet
  facet normal 0.000000e+00 0.000000e+00 1.000000e+00
    outer loop
      vertex 3.219961e-01 -3.420905e+01 1.876000e+00
      vertex -5.643957e+00 -4.190705e+01 1.876000e+00
      vertex 3.219961e-01 -4.039494e+01 1.876000e+00
    endloop
  endfacet
  facet normal 0.000000e+00 0.000000e+00 1.000000e+00
    outer loop
      vertex -5.643957e+00 -3.269694e+01 1.876000e+00
      vertex -5.643957e+00 -4.190705e+01 1.876000e+00
      vertex 3.219961e-01 -3.420905e+01 1.876000e+00
    endloop
  endfacet
  facet normal 0.000000e+00 0.000000e+00 1.000000e+00
    outer loop
      vertex -7.376008e+00 -3.269694e+01 1.876000e+00
      vertex -5.643957e+00 -4.190705e+01 1.876000e+00
      vertex -5.643957e+00 -3.269694e+01 1.876000e+00
    endloop
  endfacet
  facet normal 0.000000e+00 0.000000e+00 1.000000e+00
    outer loop
      vertex -7.376008e+00 -3.269694e+01 1.876000e+00
      vertex -7.376008e+00 -4.190705e+01 1.876000e+00
      vertex -5.643957e+00 -4.190705e+01 1.876000e+00
    endloop
  endfacet
  facet normal 0.000000e+00 0.000000e+00 1.000000e+00
    outer loop
      vertex -1.334196e+01 -3.269694e+01 1.876000e+00
      vertex -7.376008e+00 -4.190705e+01 1.876000e+00
      vertex -7.376008e+00 -3.269694e+01 1.876000e+00
    endloop
  endfacet
  facet normal 0.000000e+00 0.000000e+00 1.000000e+00
    outer loop
      vertex -1.334196e+01 -4.190705e+01 1.876000e+00
      vertex -1.334196e+01 -3.269694e+01 1.876000e+00
      vertex -1.507401e+01 -3.269694e+01 1.876000e+00
    endloop
  endfacet
  facet normal 0.000000e+00 0.000000e+00 1.000000e+00
    outer loop
      vertex -1.334196e+01 -4.190705e+01 1.876000e+00
      vertex -7.376008e+00 -4.190705e+01 1.876000e+00
      vertex -1.334196e+01 -3.269694e+01 1.876000e+00
    endloop
  endfacet
  facet normal 0.000000e+00 0.000000e+00 1.000000e+00
    outer loop
      vertex -7.376008e+00 -4.809295e+01 1.876000e+00
      vertex -7.376008e+00 -4.190705e+01 1.876000e+00
      vertex -1.334196e+01 -4.190705e+01 1.876000e+00
    endloop
  endfacet
  facet normal 0.000000e+00 0.000000e+00 1.000000e+00
    outer loop
      vertex 3.219961e-01 2.118908e+01 1.876000e+00
      vertex 3.219961e-01 1.197897e+01 1.876000e+00
      vertex 2.054047e+00 1.197897e+01 1.876000e+00
    endloop
  endfacet
  facet normal 0.000000e+00 0.000000e+00 1.000000e+00
    outer loop
      vertex 3.219961e-01 2.118908e+01 1.876000e+00
      vertex -5.643957e+00 1.349108e+01 1.876000e+00
      vertex 3.219961e-01 1.197897e+01 1.876000e+00
    endloop
  endfacet
  facet normal 0.000000e+00 0.000000e+00 1.000000e+00
    outer loop
      vertex -5.643957e+00 1.967698e+01 1.876000e+00
      vertex -5.643957e+00 1.349108e+01 1.876000e+00
      vertex 3.219961e-01 2.118908e+01 1.876000e+00
    endloop
  endfacet
  facet normal 0.000000e+00 0.000000e+00 1.000000e+00
    outer loop
      vertex -2.103996e+01 2.737498e+01 1.876000e+00
      vertex -2.103996e+01 3.658509e+01 1.876000e+00
      vertex -2.277201e+01 3.658509e+01 1.876000e+00
    endloop
  endfacet
  facet normal 0.000000e+00 0.000000e+00 1.000000e+00
    outer loop
      vertex -2.103996e+01 2.737498e+01 1.876000e+00
      vertex -1.507401e+01 2.888709e+01 1.876000e+00
      vertex -2.103996e+01 3.658509e+01 1.876000e+00
    endloop
  endfacet
  facet normal 0.000000e+00 0.000000e+00 1.000000e+00
    outer loop
      vertex -2.103996e+01 2.118908e+01 1.876000e+00
      vertex -1.507401e+01 2.888709e+01 1.876000e+00
      vertex -2.103996e+01 2.737498e+01 1.876000e+00
    endloop
  endfacet
  facet normal 0.000000e+00 0.000000e+00 1.000000e+00
    outer loop
      vertex -2.103996e+01 2.118908e+01 1.876000e+00
      vertex -1.334196e+01 2.888709e+01 1.876000e+00
      vertex -1.507401e+01 2.888709e+01 1.876000e+00
    endloop
  endfacet
  facet normal 0.000000e+00 0.000000e+00 1.000000e+00
    outer loop
      vertex -7.376008e+00 1.967698e+01 1.876000e+00
      vertex -1.334196e+01 2.888709e+01 1.876000e+00
      vertex -2.103996e+01 2.118908e+01 1.876000e+00
    endloop
  endfacet
  facet normal 0.000000e+00 0.000000e+00 1.000000e+00
    outer loop
      vertex -7.376008e+00 1.967698e+01 1.876000e+00
      vertex -7.376008e+00 2.888709e+01 1.876000e+00
      vertex -1.334196e+01 2.888709e+01 1.876000e+00
    endloop
  endfacet
  facet normal 0.000000e+00 0.000000e+00 1.000000e+00
    outer loop
      vertex -5.643957e+00 1.967698e+01 1.876000e+00
      vertex -7.376008e+00 2.888709e+01 1.876000e+00
      vertex -7.376008e+00 1.967698e+01 1.876000e+00
    endloop
  endfacet
  facet normal 0.000000e+00 0.000000e+00 1.000000e+00
    outer loop
      vertex -5.643957e+00 1.967698e+01 1.876000e+00
      vertex -5.643957e+00 2.888709e+01 1.876000e+00
      vertex -7.376008e+00 2.888709e+01 1.876000e+00
    endloop
  endfacet
  facet normal 0.000000e+00 0.000000e+00 1.000000e+00
    outer loop
      vertex 3.219961e-01 2.118908e+01 1.876000e+00
      vertex -5.643957e+00 2.888709e+01 1.876000e+00
      vertex -5.643957e+00 1.967698e+01 1.876000e+00
    endloop
  endfacet
  facet normal 0.000000e+00 0.000000e+00 1.000000e+00
    outer loop
      vertex -4.413398e+01 2.737498e+01 1.876000e+00
      vertex -3.816802e+01 2.888709e+01 1.876000e+00
      vertex -3.816802e+01 3.507298e+01 1.876000e+00
    endloop
  endfacet
  facet normal 0.000000e+00 0.000000e+00 1.000000e+00
    outer loop
      vertex -4.413398e+01 2.118908e+01 1.876000e+00
      vertex -3.816802e+01 2.888709e+01 1.876000e+00
      vertex -4.413398e+01 2.737498e+01 1.876000e+00
    endloop
  endfacet
  facet normal 0.000000e+00 0.000000e+00 1.000000e+00
    outer loop
      vertex -4.413398e+01 2.118908e+01 1.876000e+00
      vertex -3.643597e+01 2.888709e+01 1.876000e+00
      vertex -3.816802e+01 2.888709e+01 1.876000e+00
    endloop
  endfacet
  facet normal 0.000000e+00 0.000000e+00 1.000000e+00
    outer loop
      vertex -3.047002e+01 1.967698e+01 1.876000e+00
      vertex -3.643597e+01 2.888709e+01 1.876000e+00
      vertex -4.413398e+01 2.118908e+01 1.876000e+00
    endloop
  endfacet
  facet normal 0.000000e+00 0.000000e+00 1.000000e+00
    outer loop
      vertex -3.047002e+01 1.967698e+01 1.876000e+00
      vertex -2.277201e+01 2.737498e+01 1.876000e+00
      vertex -3.643597e+01 2.888709e+01 1.876000e+00
    endloop
  endfacet
  facet normal 0.000000e+00 0.000000e+00 1.000000e+00
    outer loop
      vertex -2.873797e+01 1.967698e+01 1.876000e+00
      vertex -2.277201e+01 2.737498e+01 1.876000e+00
      vertex -3.047002e+01 1.967698e+01 1.876000e+00
    endloop
  endfacet
  facet normal 0.000000e+00 0.000000e+00 1.000000e+00
    outer loop
      vertex -2.873797e+01 1.967698e+01 1.876000e+00
      vertex -2.277201e+01 2.118908e+01 1.876000e+00
      vertex -2.277201e+01 2.737498e+01 1.876000e+00
    endloop
  endfacet
  facet normal 0.000000e+00 0.000000e+00 1.000000e+00
    outer loop
      vertex -2.873797e+01 1.349108e+01 1.876000e+00
      vertex -2.277201e+01 2.118908e+01 1.876000e+00
      vertex -2.873797e+01 1.967698e+01 1.876000e+00
    endloop
  endfacet
  facet normal 0.000000e+00 0.000000e+00 1.000000e+00
    outer loop
      vertex -2.873797e+01 1.349108e+01 1.876000e+00
      vertex -2.103996e+01 2.118908e+01 1.876000e+00
      vertex -2.277201e+01 2.118908e+01 1.876000e+00
    endloop
  endfacet
  facet normal 0.000000e+00 0.000000e+00 1.000000e+00
    outer loop
      vertex -1.507401e+01 1.197897e+01 1.876000e+00
      vertex -2.103996e+01 2.118908e+01 1.876000e+00
      vertex -2.873797e+01 1.349108e+01 1.876000e+00
    endloop
  endfacet
  facet normal 0.000000e+00 0.000000e+00 1.000000e+00
    outer loop
      vertex -1.507401e+01 1.197897e+01 1.876000e+00
      vertex -7.376008e+00 1.967698e+01 1.876000e+00
      vertex -2.103996e+01 2.118908e+01 1.876000e+00
    endloop
  endfacet
  facet normal 0.000000e+00 0.000000e+00 1.000000e+00
    outer loop
      vertex -1.334196e+01 1.197897e+01 1.876000e+00
      vertex -7.376008e+00 1.967698e+01 1.876000e+00
      vertex -1.507401e+01 1.197897e+01 1.876000e+00
    endloop
  endfacet
  facet normal 0.000000e+00 0.000000e+00 1.000000e+00
    outer loop
      vertex -1.334196e+01 1.197897e+01 1.876000e+00
      vertex -7.376008e+00 1.349108e+01 1.876000e+00
      vertex -7.376008e+00 1.967698e+01 1.876000e+00
    endloop
  endfacet
  facet normal 0.000000e+00 0.000000e+00 1.000000e+00
    outer loop
      vertex -1.334196e+01 5.793077e+00 1.876000e+00
      vertex -7.376008e+00 1.349108e+01 1.876000e+00
      vertex -1.334196e+01 1.197897e+01 1.876000e+00
    endloop
  endfacet
  facet normal 0.000000e+00 0.000000e+00 1.000000e+00
    outer loop
      vertex 2.054047e+00 -3.417034e+00 1.876000e+00
      vertex 2.054047e+00 -9.602930e+00 1.876000e+00
      vertex 8.020000e+00 -9.602930e+00 1.876000e+00
    endloop
  endfacet
  facet normal 0.000000e+00 0.000000e+00 1.000000e+00
    outer loop
      vertex -4.586602e+01 -4.809295e+01 1.876000e+00
      vertex -5.000000e+01 -5.000000e+01 1.876000e+00
      vertex -4.413398e+01 -4.809295e+01 1.876000e+00
    endloop
  endfacet
  facet normal 0.000000e+00 0.000000e+00 1.000000e+00
    outer loop
      vertex -4.586602e+01 -4.190705e+01 1.876000e+00
      vertex -5.000000e+01 -5.000000e+01 1.876000e+00
      vertex -4.586602e+01 -4.809295e+01 1.876000e+00
    endloop
  endfacet
  facet normal 0.000000e+00 0.000000e+00 1.000000e+00
    outer loop
      vertex -4.586602e+01 -4.190705e+01 1.876000e+00
      vertex -4.586602e+01 -2.499894e+01 1.876000e+00
      vertex -5.000000e+01 -5.000000e+01 1.876000e+00
    endloop
  endfacet
  facet normal 0.000000e+00 0.000000e+00 1.000000e+00
    outer loop
      vertex -3.816802e+01 -3.269694e+01 1.876000e+00
      vertex -4.586602e+01 -2.499894e+01 1.876000e+00
      vertex -4.586602e+01 -4.190705e+01 1.876000e+00
    endloop
  endfacet
  facet normal 0.000000e+00 0.000000e+00 1.000000e+00
    outer loop
      vertex -3.816802e+01 -3.269694e+01 1.876000e+00
      vertex -4.413398e+01 -2.499894e+01 1.876000e+00
      vertex -4.586602e+01 -2.499894e+01 1.876000e+00
    endloop
  endfacet
  facet normal 0.000000e+00 0.000000e+00 1.000000e+00
    outer loop
      vertex -3.816802e+01 -2.651105e+01 1.876000e+00
      vertex -4.413398e+01 -2.499894e+01 1.876000e+00
      vertex -3.816802e+01 -3.269694e+01 1.876000e+00
    endloop
  endfacet
  facet normal 0.000000e+00 0.000000e+00 1.000000e+00
    outer loop
      vertex -3.816802e+01 -2.651105e+01 1.876000e+00
      vertex -4.413398e+01 -1.881304e+01 1.876000e+00
      vertex -4.413398e+01 -2.499894e+01 1.876000e+00
    endloop
  endfacet
  facet normal 0.000000e+00 0.000000e+00 1.000000e+00
    outer loop
      vertex -3.643597e+01 -2.651105e+01 1.876000e+00
      vertex -4.413398e+01 -1.881304e+01 1.876000e+00
      vertex -3.816802e+01 -2.651105e+01 1.876000e+00
    endloop
  endfacet
  facet normal 0.000000e+00 0.000000e+00 1.000000e+00
    outer loop
      vertex -3.643597e+01 -2.651105e+01 1.876000e+00
      vertex -3.047002e+01 -1.730093e+01 1.876000e+00
      vertex -4.413398e+01 -1.881304e+01 1.876000e+00
    endloop
  endfacet
  facet normal 0.000000e+00 0.000000e+00 1.000000e+00
    outer loop
      vertex -2.277201e+01 -2.499894e+01 1.876000e+00
      vertex -3.047002e+01 -1.730093e+01 1.876000e+00
      vertex -3.643597e+01 -2.651105e+01 1.876000e+00
    endloop
  endfacet
  facet normal 0.000000e+00 0.000000e+00 1.000000e+00
    outer loop
      vertex -2.277201e+01 -2.499894e+01 1.876000e+00
      vertex -2.873797e+01 -1.730093e+01 1.876000e+00
      vertex -3.047002e+01 -1.730093e+01 1.876000e+00
    endloop
  endfacet
  facet normal 0.000000e+00 0.000000e+00 1.000000e+00
    outer loop
      vertex -2.277201e+01 -1.881304e+01 1.876000e+00
      vertex -2.873797e+01 -1.730093e+01 1.876000e+00
      vertex -2.277201e+01 -2.499894e+01 1.876000e+00
    endloop
  endfacet
  facet normal 0.000000e+00 0.000000e+00 1.000000e+00
    outer loop
      vertex -2.277201e+01 -1.881304e+01 1.876000e+00
      vertex -2.873797e+01 -1.111504e+01 1.876000e+00
      vertex -2.873797e+01 -1.730093e+01 1.876000e+00
    endloop
  endfacet
  facet normal 0.000000e+00 0.000000e+00 1.000000e+00
    outer loop
      vertex -2.103996e+01 -1.881304e+01 1.876000e+00
      vertex -2.873797e+01 -1.111504e+01 1.876000e+00
      vertex -2.277201e+01 -1.881304e+01 1.876000e+00
    endloop
  endfacet
  facet normal 0.000000e+00 0.000000e+00 1.000000e+00
    outer loop
      vertex -2.103996e+01 -1.881304e+01 1.876000e+00
      vertex -1.507401e+01 -9.602930e+00 1.876000e+00
      vertex -2.873797e+01 -1.111504e+01 1.876000e+00
    endloop
  endfacet
  facet normal 0.000000e+00 0.000000e+00 1.000000e+00
    outer loop
      vertex -7.376008e+00 -1.730093e+01 1.876000e+00
      vertex -1.507401e+01 -9.602930e+00 1.876000e+00
      vertex -2.103996e+01 -1.881304e+01 1.876000e+00
    endloop
  endfacet
  facet normal 0.000000e+00 0.000000e+00 1.000000e+00
    outer loop
      vertex -7.376008e+00 -1.730093e+01 1.876000e+00
      vertex -1.334196e+01 -9.602930e+00 1.876000e+00
      vertex -1.507401e+01 -9.602930e+00 1.876000e+00
    endloop
  endfacet
  facet normal 0.000000e+00 0.000000e+00 1.000000e+00
    outer loop
      vertex -7.376008e+00 -1.111504e+01 1.876000e+00
      vertex -1.334196e+01 -9.602930e+00 1.876000e+00
      vertex -7.376008e+00 -1.730093e+01 1.876000e+00
    endloop
  endfacet
  facet normal 0.000000e+00 0.000000e+00 1.000000e+00
    outer loop
      vertex -7.376008e+00 -1.111504e+01 1.876000e+00
      vertex -1.334196e+01 -3.417034e+00 1.876000e+00
      vertex -1.334196e+01 -9.602930e+00 1.876000e+00
    endloop
  endfacet
  facet normal 0.000000e+00 0.000000e+00 1.000000e+00
    outer loop
      vertex -5.643957e+00 -1.111504e+01 1.876000e+00
      vertex -1.334196e+01 -3.417034e+00 1.876000e+00
      vertex -7.376008e+00 -1.111504e+01 1.876000e+00
    endloop
  endfacet
  facet normal 0.000000e+00 0.000000e+00 1.000000e+00
    outer loop
      vertex -5.643957e+00 -1.111504e+01 1.876000e+00
      vertex 3.219961e-01 -3.417034e+00 1.876000e+00
      vertex -1.334196e+01 -3.417034e+00 1.876000e+00
    endloop
  endfacet
  facet normal 0.000000e+00 0.000000e+00 1.000000e+00
    outer loop
      vertex 3.219961e-01 -9.602930e+00 1.876000e+00
      vertex 3.219961e-01 -3.417034e+00 1.876000e+00
      vertex -5.643957e+00 -1.111504e+01 1.876000e+00
    endloop
  endfacet
  facet normal 0.000000e+00 0.000000e+00 1.000000e+00
    outer loop
      vertex 9.752050e+00 -9.602930e+00 1.876000e+00
      vertex 1.571800e+01 -1.730093e+01 1.876000e+00
      vertex 1.571800e+01 -1.111504e+01 1.876000e+00
    endloop
  endfacet
  facet normal 0.000000e+00 0.000000e+00 1.000000e+00
    outer loop
      vertex 9.752050e+00 -9.602930e+00 1.876000e+00
      vertex 9.752050e+00 -1.881304e+01 1.876000e+00
      vertex 1.571800e+01 -1.730093e+01 1.876000e+00
    endloop
  endfacet
  facet normal 0.000000e+00 0.000000e+00 1.000000e+00
    outer loop
      vertex 8.020000e+00 -9.602930e+00 1.876000e+00
      vertex 9.752050e+00 -1.881304e+01 1.876000e+00
      vertex 9.752050e+00 -9.602930e+00 1.876000e+00
    endloop
  endfacet
  facet normal 0.000000e+00 0.000000e+00 1.000000e+00
    outer loop
      vertex 8.020000e+00 -9.602930e+00 1.876000e+00
      vertex 8.020000e+00 -1.881304e+01 1.876000e+00
      vertex 9.752050e+00 -1.881304e+01 1.876000e+00
    endloop
  endfacet
  facet normal 0.000000e+00 0.000000e+00 1.000000e+00
    outer loop
      vertex 2.054047e+00 -9.602930e+00 1.876000e+00
      vertex 8.020000e+00 -1.881304e+01 1.876000e+00
      vertex 8.020000e+00 -9.602930e+00 1.876000e+00
    endloop
  endfacet
  facet normal 0.000000e+00 0.000000e+00 1.000000e+00
    outer loop
      vertex 2.054047e+00 -9.602930e+00 1.876000e+00
      vertex 2.054047e+00 -1.881304e+01 1.876000e+00
      vertex 8.020000e+00 -1.881304e+01 1.876000e+00
    endloop
  endfacet
  facet normal 0.000000e+00 0.000000e+00 1.000000e+00
    outer loop
      vertex 3.219961e-01 -9.602930e+00 1.876000e+00
      vertex 2.054047e+00 -1.881304e+01 1.876000e+00
      vertex 2.054047e+00 -9.602930e+00 1.876000e+00
    endloop
  endfacet
  facet normal 0.000000e+00 0.000000e+00 1.000000e+00
    outer loop
      vertex 3.219961e-01 -9.602930e+00 1.876000e+00
      vertex 3.219961e-01 -1.881304e+01 1.876000e+00
      vertex 2.054047e+00 -1.881304e+01 1.876000e+00
    endloop
  endfacet
  facet normal 0.000000e+00 0.000000e+00 1.000000e+00
    outer loop
      vertex -5.643957e+00 -1.111504e+01 1.876000e+00
      vertex 3.219961e-01 -1.881304e+01 1.876000e+00
      vertex 3.219961e-01 -9.602930e+00 1.876000e+00
    endloop
  endfacet
  facet normal 0.000000e+00 0.000000e+00 1.000000e+00
    outer loop
      vertex -4.413398e+01 4.280970e+00 1.876000e+00
      vertex -3.047002e+01 -1.904926e+00 1.876000e+00
      vertex -3.047002e+01 4.280970e+00 1.876000e+00
    endloop
  endfacet
  facet normal 0.000000e+00 0.000000e+00 1.000000e+00
    outer loop
      vertex -4.413398e+01 -1.904926e+00 1.876000e+00
      vertex -3.047002e+01 -1.904926e+00 1.876000e+00
      vertex -4.413398e+01 4.280970e+00 1.876000e+00
    endloop
  endfacet
  facet normal 0.000000e+00 0.000000e+00 1.000000e+00
    outer loop
      vertex -4.413398e+01 -1.904926e+00 1.876000e+00
      vertex -3.047002e+01 -3.417034e+00 1.876000e+00
      vertex -3.047002e+01 -1.904926e+00 1.876000e+00
    endloop
  endfacet
  facet normal 0.000000e+00 0.000000e+00 1.000000e+00
    outer loop
      vertex -4.413398e+01 -3.417034e+00 1.876000e+00
      vertex -3.047002e+01 -3.417034e+00 1.876000e+00
      vertex -4.413398e+01 -1.904926e+00 1.876000e+00
    endloop
  endfacet
  facet normal 0.000000e+00 0.000000e+00 1.000000e+00
    outer loop
      vertex -4.413398e+01 -3.417034e+00 1.876000e+00
      vertex -3.047002e+01 -9.602930e+00 1.876000e+00
      vertex -3.047002e+01 -3.417034e+00 1.876000e+00
    endloop
  endfacet
  facet normal 0.000000e+00 0.000000e+00 1.000000e+00
    outer loop
      vertex -4.413398e+01 -9.602930e+00 1.876000e+00
      vertex -3.047002e+01 -9.602930e+00 1.876000e+00
      vertex -4.413398e+01 -3.417034e+00 1.876000e+00
    endloop
  endfacet
  facet normal 0.000000e+00 0.000000e+00 1.000000e+00
    outer loop
      vertex -4.586602e+01 -1.904926e+00 1.876000e+00
      vertex -4.413398e+01 -3.417034e+00 1.876000e+00
      vertex -4.413398e+01 -1.904926e+00 1.876000e+00
    endloop
  endfacet
  facet normal 0.000000e+00 0.000000e+00 1.000000e+00
    outer loop
      vertex -4.586602e+01 -3.417034e+00 1.876000e+00
      vertex -4.413398e+01 -3.417034e+00 1.876000e+00
      vertex -4.586602e+01 -1.904926e+00 1.876000e+00
    endloop
  endfacet
  facet normal 0.000000e+00 0.000000e+00 1.000000e+00
    outer loop
      vertex -2.873797e+01 4.280970e+00 1.876000e+00
      vertex -1.507401e+01 -1.904926e+00 1.876000e+00
      vertex -1.507401e+01 4.280970e+00 1.876000e+00
    endloop
  endfacet
  facet normal 0.000000e+00 0.000000e+00 1.000000e+00
    outer loop
      vertex -2.873797e+01 -1.904926e+00 1.876000e+00
      vertex -1.507401e+01 -1.904926e+00 1.876000e+00
      vertex -2.873797e+01 4.280970e+00 1.876000e+00
    endloop
  endfacet
  facet normal 0.000000e+00 0.000000e+00 1.000000e+00
    outer loop
      vertex -2.873797e+01 -1.904926e+00 1.876000e+00
      vertex -1.507401e+01 -3.417034e+00 1.876000e+00
      vertex -1.507401e+01 -1.904926e+00 1.876000e+00
    endloop
  endfacet
  facet normal 0.000000e+00 0.000000e+00 1.000000e+00
    outer loop
      vertex -2.873797e+01 -3.417034e+00 1.876000e+00
      vertex -1.507401e+01 -3.417034e+00 1.876000e+00
      vertex -2.873797e+01 -1.904926e+00 1.876000e+00
    endloop
  endfacet
  facet normal 0.000000e+00 0.000000e+00 1.000000e+00
    outer loop
      vertex -2.873797e+01 -3.417034e+00 1.876000e+00
      vertex -1.507401e+01 -9.602930e+00 1.876000e+00
      vertex -1.507401e+01 -3.417034e+00 1.876000e+00
    endloop
  endfacet
  facet normal 0.000000e+00 0.000000e+00 1.000000e+00
    outer loop
      vertex -2.873797e+01 -9.602930e+00 1.876000e+00
      vertex -1.507401e+01 -9.602930e+00 1.876000e+00
      vertex -2.873797e+01 -3.417034e+00 1.876000e+00
    endloop
  endfacet
  facet normal 0.000000e+00 0.000000e+00 1.000000e+00
    outer loop
      vertex -2.873797e+01 -9.602930e+00 1.876000e+00
      vertex -2.873797e+01 -1.111504e+01 1.876000e+00
      vertex -1.507401e+01 -9.602930e+00 1.876000e+00
    endloop
  endfacet
  facet normal 0.000000e+00 0.000000e+00 1.000000e+00
    outer loop
      vertex -3.047002e+01 -9.602930e+00 1.876000e+00
      vertex -2.873797e+01 -1.111504e+01 1.876000e+00
      vertex -2.873797e+01 -9.602930e+00 1.876000e+00
    endloop
  endfacet
  facet normal 0.000000e+00 0.000000e+00 1.000000e+00
    outer loop
      vertex -3.047002e+01 -9.602930e+00 1.876000e+00
      vertex -3.047002e+01 -1.111504e+01 1.876000e+00
      vertex -2.873797e+01 -1.111504e+01 1.876000e+00
    endloop
  endfacet
  facet normal 0.000000e+00 0.000000e+00 1.000000e+00
    outer loop
      vertex -4.413398e+01 -9.602930e+00 1.876000e+00
      vertex -3.047002e+01 -1.111504e+01 1.876000e+00
      vertex -3.047002e+01 -9.602930e+00 1.876000e+00
    endloop
  endfacet
  facet normal 0.000000e+00 0.000000e+00 1.000000e+00
    outer loop
      vertex -4.413398e+01 -9.602930e+00 1.876000e+00
      vertex -4.413398e+01 -1.111504e+01 1.876000e+00
      vertex -3.047002e+01 -1.111504e+01 1.876000e+00
    endloop
  endfacet
  facet normal 0.000000e+00 0.000000e+00 1.000000e+00
    outer loop
      vertex -4.586602e+01 -9.602930e+00 1.876000e+00
      vertex -4.413398e+01 -1.111504e+01 1.876000e+00
      vertex -4.413398e+01 -9.602930e+00 1.876000e+00
    endloop
  endfacet
  facet normal 0.000000e+00 0.000000e+00 1.000000e+00
    outer loop
      vertex -4.586602e+01 -9.602930e+00 1.876000e+00
      vertex -4.586602e+01 -1.111504e+01 1.876000e+00
      vertex -4.413398e+01 -1.111504e+01 1.876000e+00
    endloop
  endfacet
  facet normal 0.000000e+00 0.000000e+00 1.000000e+00
    outer loop
      vertex -5.000000e+01 -5.000000e+01 1.876000e+00
      vertex -4.586602e+01 -1.111504e+01 1.876000e+00
      vertex -4.586602e+01 -9.602930e+00 1.876000e+00
    endloop
  endfacet
  facet normal 0.000000e+00 0.000000e+00 1.000000e+00
    outer loop
      vertex -5.000000e+01 -5.000000e+01 1.876000e+00
      vertex -4.586602e+01 -1.730093e+01 1.876000e+00
      vertex -4.586602e+01 -1.111504e+01 1.876000e+00
    endloop
  endfacet
  facet normal 0.000000e+00 0.000000e+00 1.000000e+00
    outer loop
      vertex -4.586602e+01 -1.881304e+01 1.876000e+00
      vertex -4.586602e+01 -1.730093e+01 1.876000e+00
      vertex -5.000000e+01 -5.000000e+01 1.876000e+00
    endloop
  endfacet
  facet normal 0.000000e+00 0.000000e+00 1.000000e+00
    outer loop
      vertex 9.752050e+00 4.280970e+00 1.876000e+00
      vertex 2.341601e+01 4.280970e+00 1.876000e+00
      vertex 2.341601e+01 5.793077e+00 1.876000e+00
    endloop
  endfacet
  facet normal 0.000000e+00 0.000000e+00 1.000000e+00
    outer loop
      vertex 9.752050e+00 4.280970e+00 1.876000e+00
      vertex 2.341601e+01 -1.904926e+00 1.876000e+00
      vertex 2.341601e+01 4.280970e+00 1.876000e+00
    endloop
  endfacet
  facet normal 0.000000e+00 0.000000e+00 1.000000e+00
    outer loop
      vertex 9.752050e+00 -1.904926e+00 1.876000e+00
      vertex 2.341601e+01 -1.904926e+00 1.876000e+00
      vertex 9.752050e+00 4.280970e+00 1.876000e+00
    endloop
  endfacet
  facet normal 0.000000e+00 0.000000e+00 1.000000e+00
    outer loop
      vertex 2.341601e+01 -1.904926e+00 1.876000e+00
      vertex 2.514806e+01 -3.417034e+00 1.876000e+00
      vertex 2.514806e+01 -1.904926e+00 1.876000e+00
    endloop
  endfacet
  facet normal 0.000000e+00 0.000000e+00 1.000000e+00
    outer loop
      vertex 2.341601e+01 -1.904926e+00 1.876000e+00
      vertex 2.341601e+01 -3.417034e+00 1.876000e+00
      vertex 2.514806e+01 -3.417034e+00 1.876000e+00
    endloop
  endfacet
  facet normal 0.000000e+00 0.000000e+00 1.000000e+00
    outer loop
      vertex 9.752050e+00 -1.904926e+00 1.876000e+00
      vertex 2.341601e+01 -3.417034e+00 1.876000e+00
      vertex 2.341601e+01 -1.904926e+00 1.876000e+00
    endloop
  endfacet
  facet normal 0.000000e+00 0.000000e+00 1.000000e+00
    outer loop
      vertex 9.752050e+00 -1.904926e+00 1.876000e+00
      vertex 9.752050e+00 -3.417034e+00 1.876000e+00
      vertex 2.341601e+01 -3.417034e+00 1.876000e+00
    endloop
  endfacet
  facet normal 0.000000e+00 0.000000e+00 1.000000e+00
    outer loop
      vertex 8.020000e+00 -1.904926e+00 1.876000e+00
      vertex 9.752050e+00 -3.417034e+00 1.876000e+00
      vertex 9.752050e+00 -1.904926e+00 1.876000e+00
    endloop
  endfacet
  facet normal 0.000000e+00 0.000000e+00 1.000000e+00
    outer loop
      vertex 1.745005e+01 -1.730093e+01 1.876000e+00
      vertex 3.111401e+01 -1.881304e+01 1.876000e+00
      vertex 2.514806e+01 -9.602930e+00 1.876000e+00
    endloop
  endfacet
  facet normal 0.000000e+00 0.000000e+00 1.000000e+00
    outer loop
      vertex 1.745005e+01 -1.730093e+01 1.876000e+00
      vertex 1.745005e+01 -1.881304e+01 1.876000e+00
      vertex 3.111401e+01 -1.881304e+01 1.876000e+00
    endloop
  endfacet
  facet normal 0.000000e+00 0.000000e+00 1.000000e+00
    outer loop
      vertex 1.571800e+01 -1.730093e+01 1.876000e+00
      vertex 1.745005e+01 -1.881304e+01 1.876000e+00
      vertex 1.745005e+01 -1.730093e+01 1.876000e+00
    endloop
  endfacet
  facet normal 0.000000e+00 0.000000e+00 1.000000e+00
    outer loop
      vertex 1.571800e+01 -1.730093e+01 1.876000e+00
      vertex 1.571800e+01 -1.881304e+01 1.876000e+00
      vertex 1.745005e+01 -1.881304e+01 1.876000e+00
    endloop
  endfacet
  facet normal 0.000000e+00 0.000000e+00 1.000000e+00
    outer loop
      vertex 9.752050e+00 -1.881304e+01 1.876000e+00
      vertex 1.571800e+01 -1.881304e+01 1.876000e+00
      vertex 1.571800e+01 -1.730093e+01 1.876000e+00
    endloop
  endfacet
  facet normal 0.000000e+00 0.000000e+00 1.000000e+00
    outer loop
      vertex 9.752050e+00 -1.881304e+01 1.876000e+00
      vertex 1.571800e+01 -2.499894e+01 1.876000e+00
      vertex 1.571800e+01 -1.881304e+01 1.876000e+00
    endloop
  endfacet
  facet normal 0.000000e+00 0.000000e+00 1.000000e+00
    outer loop
      vertex 9.752050e+00 -2.499894e+01 1.876000e+00
      vertex 1.571800e+01 -2.499894e+01 1.876000e+00
      vertex 9.752050e+00 -1.881304e+01 1.876000e+00
    endloop
  endfacet
  facet normal 0.000000e+00 0.000000e+00 1.000000e+00
    outer loop
      vertex 3.219961e-01 -3.420905e+01 1.876000e+00
      vertex -5.643957e+00 -2.651105e+01 1.876000e+00
      vertex -5.643957e+00 -3.269694e+01 1.876000e+00
    endloop
  endfacet
  facet normal 0.000000e+00 0.000000e+00 1.000000e+00
    outer loop
      vertex 3.219961e-01 -3.420905e+01 1.876000e+00
      vertex 3.219961e-01 -2.499894e+01 1.876000e+00
      vertex -5.643957e+00 -2.651105e+01 1.876000e+00
    endloop
  endfacet
  facet normal 0.000000e+00 0.000000e+00 1.000000e+00
    outer loop
      vertex 2.054047e+00 -3.420905e+01 1.876000e+00
      vertex 3.219961e-01 -2.499894e+01 1.876000e+00
      vertex 3.219961e-01 -3.420905e+01 1.876000e+00
    endloop
  endfacet
  facet normal 0.000000e+00 0.000000e+00 1.000000e+00
    outer loop
      vertex 2.054047e+00 -3.420905e+01 1.876000e+00
      vertex 2.054047e+00 -2.499894e+01 1.876000e+00
      vertex 3.219961e-01 -2.499894e+01 1.876000e+00
    endloop
  endfacet
  facet normal 0.000000e+00 0.000000e+00 1.000000e+00
    outer loop
      vertex 8.020000e+00 -3.420905e+01 1.876000e+00
      vertex 2.054047e+00 -2.499894e+01 1.876000e+00
      vertex 2.054047e+00 -3.420905e+01 1.876000e+00
    endloop
  endfacet
  facet normal 0.000000e+00 0.000000e+00 1.000000e+00
    outer loop
      vertex 8.020000e+00 -3.420905e+01 1.876000e+00
      vertex 8.020000e+00 -2.499894e+01 1.876000e+00
      vertex 2.054047e+00 -2.499894e+01 1.876000e+00
    endloop
  endfacet
  facet normal 0.000000e+00 0.000000e+00 1.000000e+00
    outer loop
      vertex 9.752050e+00 -3.420905e+01 1.876000e+00
      vertex 8.020000e+00 -2.499894e+01 1.876000e+00
      vertex 8.020000e+00 -3.420905e+01 1.876000e+00
    endloop
  endfacet
  facet normal 0.000000e+00 0.000000e+00 1.000000e+00
    outer loop
      vertex 9.752050e+00 -3.420905e+01 1.876000e+00
      vertex 9.752050e+00 -2.499894e+01 1.876000e+00
      vertex 8.020000e+00 -2.499894e+01 1.876000e+00
    endloop
  endfacet
  facet normal 0.000000e+00 0.000000e+00 1.000000e+00
    outer loop
      vertex 1.571800e+01 -3.420905e+01 1.876000e+00
      vertex 9.752050e+00 -2.499894e+01 1.876000e+00
      vertex 9.752050e+00 -3.420905e+01 1.876000e+00
    endloop
  endfacet
  facet normal 0.000000e+00 0.000000e+00 1.000000e+00
    outer loop
      vertex 1.571800e+01 -3.420905e+01 1.876000e+00
      vertex 1.571800e+01 -2.499894e+01 1.876000e+00
      vertex 9.752050e+00 -2.499894e+01 1.876000e+00
    endloop
  endfacet
  facet normal 0.000000e+00 0.000000e+00 1.000000e+00
    outer loop
      vertex 1.745005e+01 -2.499894e+01 1.876000e+00
      vertex 1.571800e+01 -2.499894e+01 1.876000e+00
      vertex 1.571800e+01 -3.420905e+01 1.876000e+00
    endloop
  endfacet
  facet normal 0.000000e+00 0.000000e+00 1.000000e+00
    outer loop
      vertex 5.000000e+01 5.000000e+01 1.876000e+00
      vertex 1.745005e+01 4.277099e+01 1.876000e+00
      vertex 3.881202e+01 4.277099e+01 1.876000e+00
    endloop
  endfacet
  facet normal 0.000000e+00 0.000000e+00 1.000000e+00
    outer loop
      vertex 5.000000e+01 5.000000e+01 1.876000e+00
      vertex 1.571800e+01 4.277099e+01 1.876000e+00
      vertex 1.745005e+01 4.277099e+01 1.876000e+00
    endloop
  endfacet
  facet normal 0.000000e+00 0.000000e+00 1.000000e+00
    outer loop
      vertex 9.752050e+00 4.277099e+01 1.876000e+00
      vertex 1.571800e+01 4.277099e+01 1.876000e+00
      vertex 5.000000e+01 5.000000e+01 1.876000e+00
    endloop
  endfacet
  facet normal 0.000000e+00 0.000000e+00 1.000000e+00
    outer loop
      vertex 9.752050e+00 4.277099e+01 1.876000e+00
      vertex 1.571800e+01 3.658509e+01 1.876000e+00
      vertex 1.571800e+01 4.277099e+01 1.876000e+00
    endloop
  endfacet
  facet normal 0.000000e+00 0.000000e+00 1.000000e+00
    outer loop
      vertex 9.752050e+00 3.658509e+01 1.876000e+00
      vertex 1.571800e+01 3.658509e+01 1.876000e+00
      vertex 9.752050e+00 4.277099e+01 1.876000e+00
    endloop
  endfacet
  facet normal 0.000000e+00 0.000000e+00 1.000000e+00
    outer loop
      vertex 3.881202e+01 4.277099e+01 1.876000e+00
      vertex 2.514806e+01 3.507298e+01 1.876000e+00
      vertex 3.881202e+01 3.658509e+01 1.876000e+00
    endloop
  endfacet
  facet normal 0.000000e+00 0.000000e+00 1.000000e+00
    outer loop
      vertex 1.745005e+01 4.277099e+01 1.876000e+00
      vertex 2.514806e+01 3.507298e+01 1.876000e+00
      vertex 3.881202e+01 4.277099e+01 1.876000e+00
    endloop
  endfacet
  facet normal 0.000000e+00 0.000000e+00 1.000000e+00
    outer loop
      vertex 1.745005e+01 4.277099e+01 1.876000e+00
      vertex 2.341601e+01 3.507298e+01 1.876000e+00
      vertex 2.514806e+01 3.507298e+01 1.876000e+00
    endloop
  endfacet
  facet normal 0.000000e+00 0.000000e+00 1.000000e+00
    outer loop
      vertex 1.745005e+01 3.658509e+01 1.876000e+00
      vertex 2.341601e+01 3.507298e+01 1.876000e+00
      vertex 1.745005e+01 4.277099e+01 1.876000e+00
    endloop
  endfacet
  facet normal 0.000000e+00 0.000000e+00 1.000000e+00
    outer loop
      vertex 1.745005e+01 3.658509e+01 1.876000e+00
      vertex 2.341601e+01 2.888709e+01 1.876000e+00
      vertex 2.341601e+01 3.507298e+01 1.876000e+00
    endloop
  endfacet
  facet normal 0.000000e+00 0.000000e+00 1.000000e+00
    outer loop
      vertex 1.571800e+01 3.658509e+01 1.876000e+00
      vertex 2.341601e+01 2.888709e+01 1.876000e+00
      vertex 1.745005e+01 3.658509e+01 1.876000e+00
    endloop
  endfacet
  facet normal 0.000000e+00 0.000000e+00 1.000000e+00
    outer loop
      vertex 1.571800e+01 3.658509e+01 1.876000e+00
      vertex 9.752050e+00 2.737498e+01 1.876000e+00
      vertex 2.341601e+01 2.888709e+01 1.876000e+00
    endloop
  endfacet
  facet normal 0.000000e+00 0.000000e+00 1.000000e+00
    outer loop
      vertex 9.752050e+00 3.658509e+01 1.876000e+00
      vertex 9.752050e+00 2.737498e+01 1.876000e+00
      vertex 1.571800e+01 3.658509e+01 1.876000e+00
    endloop
  endfacet
  facet normal 0.000000e+00 0.000000e+00 1.000000e+00
    outer loop
      vertex 2.514806e+01 4.280970e+00 1.876000e+00
      vertex 2.341601e+01 5.793077e+00 1.876000e+00
      vertex 2.341601e+01 4.280970e+00 1.876000e+00
    endloop
  endfacet
  facet normal 0.000000e+00 0.000000e+00 1.000000e+00
    outer loop
      vertex 2.514806e+01 5.793077e+00 1.876000e+00
      vertex 2.341601e+01 5.793077e+00 1.876000e+00
      vertex 2.514806e+01 4.280970e+00 1.876000e+00
    endloop
  endfacet
  facet normal 0.000000e+00 0.000000e+00 1.000000e+00
    outer loop
      vertex 3.111401e+01 -1.881304e+01 1.876000e+00
      vertex 3.284606e+01 -1.881304e+01 1.876000e+00
      vertex 3.881202e+01 -1.111504e+01 1.876000e+00
    endloop
  endfacet
  facet normal 0.000000e+00 0.000000e+00 1.000000e+00
    outer loop
      vertex 1.745005e+01 -3.420905e+01 1.876000e+00
      vertex 1.745005e+01 -2.499894e+01 1.876000e+00
      vertex 1.571800e+01 -3.420905e+01 1.876000e+00
    endloop
  endfacet
  facet normal 0.000000e+00 0.000000e+00 1.000000e+00
    outer loop
      vertex 2.341601e+01 -2.651105e+01 1.876000e+00
      vertex 1.745005e+01 -2.499894e+01 1.876000e+00
      vertex 1.745005e+01 -3.420905e+01 1.876000e+00
    endloop
  endfacet
  facet normal 0.000000e+00 0.000000e+00 1.000000e+00
    outer loop
      vertex 2.341601e+01 -2.651105e+01 1.876000e+00
      vertex 1.745005e+01 -1.881304e+01 1.876000e+00
      vertex 1.745005e+01 -2.499894e+01 1.876000e+00
    endloop
  endfacet
  facet normal 0.000000e+00 0.000000e+00 1.000000e+00
    outer loop
      vertex 2.514806e+01 -2.651105e+01 1.876000e+00
      vertex 1.745005e+01 -1.881304e+01 1.876000e+00
      vertex 2.341601e+01 -2.651105e+01 1.876000e+00
    endloop
  endfacet
  facet normal 0.000000e+00 0.000000e+00 1.000000e+00
    outer loop
      vertex 2.514806e+01 -2.651105e+01 1.876000e+00
      vertex 3.111401e+01 -1.881304e+01 1.876000e+00
      vertex 1.745005e+01 -1.881304e+01 1.876000e+00
    endloop
  endfacet
  facet normal 0.000000e+00 0.000000e+00 1.000000e+00
    outer loop
      vertex 3.111401e+01 -2.499894e+01 1.876000e+00
      vertex 3.111401e+01 -1.881304e+01 1.876000e+00
      vertex 2.514806e+01 -2.651105e+01 1.876000e+00
    endloop
  endfacet
  facet normal 0.000000e+00 0.000000e+00 1.000000e+00
    outer loop
      vertex 9.752050e+00 -4.039494e+01 1.876000e+00
      vertex 1.571800e+01 -4.039494e+01 1.876000e+00
      vertex 9.752050e+00 -3.420905e+01 1.876000e+00
    endloop
  endfacet
  facet normal 0.000000e+00 0.000000e+00 1.000000e+00
    outer loop
      vertex 3.111401e+01 -4.809295e+01 1.876000e+00
      vertex 1.571800e+01 -4.039494e+01 1.876000e+00
      vertex 9.752050e+00 -4.039494e+01 1.876000e+00
    endloop
  endfacet
  facet normal 0.000000e+00 0.000000e+00 1.000000e+00
    outer loop
      vertex 3.111401e+01 -4.809295e+01 1.876000e+00
      vertex 1.745005e+01 -4.039494e+01 1.876000e+00
      vertex 1.571800e+01 -4.039494e+01 1.876000e+00
    endloop
  endfacet
  facet normal 0.000000e+00 0.000000e+00 1.000000e+00
    outer loop
      vertex 3.111401e+01 -4.190705e+01 1.876000e+00
      vertex 1.745005e+01 -4.039494e+01 1.876000e+00
      vertex 3.111401e+01 -4.809295e+01 1.876000e+00
    endloop
  endfacet
  facet normal 0.000000e+00 0.000000e+00 1.000000e+00
    outer loop
      vertex 3.111401e+01 -4.190705e+01 1.876000e+00
      vertex 2.514806e+01 -3.269694e+01 1.876000e+00
      vertex 1.745005e+01 -4.039494e+01 1.876000e+00
    endloop
  endfacet
  facet normal 0.000000e+00 0.000000e+00 1.000000e+00
    outer loop
      vertex 3.111401e+01 -3.269694e+01 1.876000e+00
      vertex 2.514806e+01 -3.269694e+01 1.876000e+00
      vertex 3.111401e+01 -4.190705e+01 1.876000e+00
    endloop
  endfacet
  facet normal 0.000000e+00 0.000000e+00 1.000000e+00
    outer loop
      vertex 3.111401e+01 -3.269694e+01 1.876000e+00
      vertex 2.514806e+01 -2.651105e+01 1.876000e+00
      vertex 2.514806e+01 -3.269694e+01 1.876000e+00
    endloop
  endfacet
  facet normal 0.000000e+00 0.000000e+00 1.000000e+00
    outer loop
      vertex 3.111401e+01 -2.651105e+01 1.876000e+00
      vertex 2.514806e+01 -2.651105e+01 1.876000e+00
      vertex 3.111401e+01 -3.269694e+01 1.876000e+00
    endloop
  endfacet
  facet normal 0.000000e+00 0.000000e+00 1.000000e+00
    outer loop
      vertex 3.111401e+01 -2.651105e+01 1.876000e+00
      vertex 3.111401e+01 -2.499894e+01 1.876000e+00
      vertex 2.514806e+01 -2.651105e+01 1.876000e+00
    endloop
  endfacet
  facet normal 0.000000e+00 0.000000e+00 1.000000e+00
    outer loop
      vertex 3.284606e+01 -2.651105e+01 1.876000e+00
      vertex 3.111401e+01 -2.499894e+01 1.876000e+00
      vertex 3.111401e+01 -2.651105e+01 1.876000e+00
    endloop
  endfacet
  facet normal 0.000000e+00 0.000000e+00 1.000000e+00
    outer loop
      vertex 3.284606e+01 -2.651105e+01 1.876000e+00
      vertex 3.284606e+01 -2.499894e+01 1.876000e+00
      vertex 3.111401e+01 -2.499894e+01 1.876000e+00
    endloop
  endfacet
  facet normal 0.000000e+00 0.000000e+00 1.000000e+00
    outer loop
      vertex 4.054406e+01 -3.420905e+01 1.876000e+00
      vertex 3.284606e+01 -2.499894e+01 1.876000e+00
      vertex 3.284606e+01 -2.651105e+01 1.876000e+00
    endloop
  endfacet
  facet normal 0.000000e+00 0.000000e+00 1.000000e+00
    outer loop
      vertex 5.000000e+01 -5.000000e+01 1.876000e+00
      vertex 4.054406e+01 -1.111504e+01 1.876000e+00
      vertex 4.054406e+01 -1.730093e+01 1.876000e+00
    endloop
  endfacet
  facet normal 0.000000e+00 0.000000e+00 1.000000e+00
    outer loop
      vertex 4.054406e+01 -9.602930e+00 1.876000e+00
      vertex 4.054406e+01 -1.111504e+01 1.876000e+00
      vertex 5.000000e+01 -5.000000e+01 1.876000e+00
    endloop
  endfacet
  facet normal 0.000000e+00 0.000000e+00 1.000000e+00
    outer loop
      vertex 3.881202e+01 -9.602930e+00 1.876000e+00
      vertex 4.054406e+01 -1.111504e+01 1.876000e+00
      vertex 4.054406e+01 -9.602930e+00 1.876000e+00
    endloop
  endfacet
  facet normal 0.000000e+00 0.000000e+00 1.000000e+00
    outer loop
      vertex 3.881202e+01 -1.111504e+01 1.876000e+00
      vertex 4.054406e+01 -1.111504e+01 1.876000e+00
      vertex 3.881202e+01 -9.602930e+00 1.876000e+00
    endloop
  endfacet
  facet normal 0.000000e+00 0.000000e+00 1.000000e+00
    outer loop
      vertex 3.284606e+01 -3.269694e+01 1.876000e+00
      vertex 3.881202e+01 -3.420905e+01 1.876000e+00
      vertex 3.284606e+01 -2.651105e+01 1.876000e+00
    endloop
  endfacet
  facet normal 0.000000e+00 0.000000e+00 1.000000e+00
    outer loop
      vertex 3.284606e+01 -4.190705e+01 1.876000e+00
      vertex 3.881202e+01 -3.420905e+01 1.876000e+00
      vertex 3.284606e+01 -3.269694e+01 1.876000e+00
    endloop
  endfacet
  facet normal 0.000000e+00 0.000000e+00 1.000000e+00
    outer loop
      vertex 3.284606e+01 -4.190705e+01 1.876000e+00
      vertex 3.881202e+01 -4.039494e+01 1.876000e+00
      vertex 3.881202e+01 -3.420905e+01 1.876000e+00
    endloop
  endfacet
  facet normal 0.000000e+00 0.000000e+00 1.000000e+00
    outer loop
      vertex 3.284606e+01 -4.809295e+01 1.876000e+00
      vertex 3.881202e+01 -4.039494e+01 1.876000e+00
      vertex 3.284606e+01 -4.190705e+01 1.876000e+00
    endloop
  endfacet
  facet normal 0.000000e+00 0.000000e+00 1.000000e+00
    outer loop
      vertex 3.284606e+01 -4.809295e+01 1.876000e+00
      vertex 4.054406e+01 -4.039494e+01 1.876000e+00
      vertex 3.881202e+01 -4.039494e+01 1.876000e+00
    endloop
  endfacet
  facet normal 0.000000e+00 0.000000e+00 1.000000e+00
    outer loop
      vertex 5.000000e+01 -5.000000e+01 1.876000e+00
      vertex 4.054406e+01 -4.039494e+01 1.876000e+00
      vertex 3.284606e+01 -4.809295e+01 1.876000e+00
    endloop
  endfacet
  facet normal 0.000000e+00 0.000000e+00 1.000000e+00
    outer loop
      vertex 5.000000e+01 -5.000000e+01 1.876000e+00
      vertex 4.054406e+01 -3.420905e+01 1.876000e+00
      vertex 4.054406e+01 -4.039494e+01 1.876000e+00
    endloop
  endfacet
  facet normal 0.000000e+00 0.000000e+00 1.000000e+00
    outer loop
      vertex 4.054406e+01 -1.730093e+01 1.876000e+00
      vertex 4.054406e+01 -3.420905e+01 1.876000e+00
      vertex 5.000000e+01 -5.000000e+01 1.876000e+00
    endloop
  endfacet
  facet normal 0.000000e+00 0.000000e+00 1.000000e+00
    outer loop
      vertex 4.054406e+01 -1.730093e+01 1.876000e+00
      vertex 3.284606e+01 -2.499894e+01 1.876000e+00
      vertex 4.054406e+01 -3.420905e+01 1.876000e+00
    endloop
  endfacet
  facet normal 0.000000e+00 0.000000e+00 1.000000e+00
    outer loop
      vertex 3.881202e+01 -1.730093e+01 1.876000e+00
      vertex 3.284606e+01 -2.499894e+01 1.876000e+00
      vertex 4.054406e+01 -1.730093e+01 1.876000e+00
    endloop
  endfacet
  facet normal 0.000000e+00 0.000000e+00 1.000000e+00
    outer loop
      vertex 3.881202e+01 -1.730093e+01 1.876000e+00
      vertex 3.284606e+01 -1.881304e+01 1.876000e+00
      vertex 3.284606e+01 -2.499894e+01 1.876000e+00
    endloop
  endfacet
  facet normal 0.000000e+00 0.000000e+00 1.000000e+00
    outer loop
      vertex 3.881202e+01 -1.111504e+01 1.876000e+00
      vertex 3.284606e+01 -1.881304e+01 1.876000e+00
      vertex 3.881202e+01 -1.730093e+01 1.876000e+00
    endloop
  endfacet
  facet normal 0.000000e+00 0.000000e+00 1.000000e+00
    outer loop
      vertex 4.054406e+01 1.349108e+01 1.876000e+00
      vertex 5.000000e+01 5.000000e+01 1.876000e+00
      vertex 4.054406e+01 1.967698e+01 1.876000e+00
    endloop
  endfacet
  facet normal 0.000000e+00 0.000000e+00 1.000000e+00
    outer loop
      vertex 4.054406e+01 1.349108e+01 1.876000e+00
      vertex 4.054406e+01 1.197897e+01 1.876000e+00
      vertex 5.000000e+01 5.000000e+01 1.876000e+00
    endloop
  endfacet
  facet normal 0.000000e+00 0.000000e+00 1.000000e+00
    outer loop
      vertex 3.881202e+01 1.349108e+01 1.876000e+00
      vertex 4.054406e+01 1.197897e+01 1.876000e+00
      vertex 4.054406e+01 1.349108e+01 1.876000e+00
    endloop
  endfacet
  facet normal 0.000000e+00 0.000000e+00 1.000000e+00
    outer loop
      vertex 3.881202e+01 1.349108e+01 1.876000e+00
      vertex 3.881202e+01 1.197897e+01 1.876000e+00
      vertex 4.054406e+01 1.197897e+01 1.876000e+00
    endloop
  endfacet
  facet normal 0.000000e+00 0.000000e+00 1.000000e+00
    outer loop
      vertex 2.514806e+01 1.197897e+01 1.876000e+00
      vertex 3.881202e+01 1.197897e+01 1.876000e+00
      vertex 3.881202e+01 1.349108e+01 1.876000e+00
    endloop
  endfacet
  facet normal 0.000000e+00 0.000000e+00 1.000000e+00
    outer loop
      vertex 2.514806e+01 1.197897e+01 1.876000e+00
      vertex 3.881202e+01 5.793077e+00 1.876000e+00
      vertex 3.881202e+01 1.197897e+01 1.876000e+00
    endloop
  endfacet
  facet normal 0.000000e+00 0.000000e+00 1.000000e+00
    outer loop
      vertex 2.514806e+01 5.793077e+00 1.876000e+00
      vertex 3.881202e+01 5.793077e+00 1.876000e+00
      vertex 2.514806e+01 1.197897e+01 1.876000e+00
    endloop
  endfacet
  facet normal 0.000000e+00 0.000000e+00 1.000000e+00
    outer loop
      vertex 2.514806e+01 5.793077e+00 1.876000e+00
      vertex 3.881202e+01 4.280970e+00 1.876000e+00
      vertex 3.881202e+01 5.793077e+00 1.876000e+00
    endloop
  endfacet
  facet normal 0.000000e+00 0.000000e+00 1.000000e+00
    outer loop
      vertex 2.514806e+01 4.280970e+00 1.876000e+00
      vertex 3.881202e+01 4.280970e+00 1.876000e+00
      vertex 2.514806e+01 5.793077e+00 1.876000e+00
    endloop
  endfacet
  facet normal 0.000000e+00 0.000000e+00 1.000000e+00
    outer loop
      vertex 2.514806e+01 4.280970e+00 1.876000e+00
      vertex 3.881202e+01 -1.904926e+00 1.876000e+00
      vertex 3.881202e+01 4.280970e+00 1.876000e+00
    endloop
  endfacet
  facet normal 0.000000e+00 0.000000e+00 1.000000e+00
    outer loop
      vertex 2.514806e+01 -1.904926e+00 1.876000e+00
      vertex 3.881202e+01 -1.904926e+00 1.876000e+00
      vertex 2.514806e+01 4.280970e+00 1.876000e+00
    endloop
  endfacet
  facet normal 0.000000e+00 0.000000e+00 1.000000e+00
    outer loop
      vertex 2.514806e+01 -1.904926e+00 1.876000e+00
      vertex 3.881202e+01 -3.417034e+00 1.876000e+00
      vertex 3.881202e+01 -1.904926e+00 1.876000e+00
    endloop
  endfacet
  facet normal 0.000000e+00 0.000000e+00 1.000000e+00
    outer loop
      vertex 2.514806e+01 -3.417034e+00 1.876000e+00
      vertex 3.881202e+01 -3.417034e+00 1.876000e+00
      vertex 2.514806e+01 -1.904926e+00 1.876000e+00
    endloop
  endfacet
  facet normal 0.000000e+00 0.000000e+00 1.000000e+00
    outer loop
      vertex 2.514806e+01 -3.417034e+00 1.876000e+00
      vertex 3.881202e+01 -9.602930e+00 1.876000e+00
      vertex 3.881202e+01 -3.417034e+00 1.876000e+00
    endloop
  endfacet
  facet normal 0.000000e+00 0.000000e+00 1.000000e+00
    outer loop
      vertex 2.514806e+01 -9.602930e+00 1.876000e+00
      vertex 3.881202e+01 -9.602930e+00 1.876000e+00
      vertex 2.514806e+01 -3.417034e+00 1.876000e+00
    endloop
  endfacet
  facet normal 0.000000e+00 0.000000e+00 1.000000e+00
    outer loop
      vertex 2.514806e+01 -9.602930e+00 1.876000e+00
      vertex 3.881202e+01 -1.111504e+01 1.876000e+00
      vertex 3.881202e+01 -9.602930e+00 1.876000e+00
    endloop
  endfacet
  facet normal 0.000000e+00 0.000000e+00 1.000000e+00
    outer loop
      vertex 3.111401e+01 -1.881304e+01 1.876000e+00
      vertex 3.881202e+01 -1.111504e+01 1.876000e+00
      vertex 2.514806e+01 -9.602930e+00 1.876000e+00
    endloop
  endfacet
  facet normal 0.000000e+00 0.000000e+00 1.000000e+00
    outer loop
      vertex -5.000000e+01 5.000000e+01 1.876000e+00
      vertex -4.413398e+01 4.277099e+01 1.876000e+00
      vertex -3.047002e+01 4.277099e+01 1.876000e+00
    endloop
  endfacet
  facet normal 0.000000e+00 0.000000e+00 1.000000e+00
    outer loop
      vertex -5.000000e+01 5.000000e+01 1.876000e+00
      vertex -4.586602e+01 4.277099e+01 1.876000e+00
      vertex -4.413398e+01 4.277099e+01 1.876000e+00
    endloop
  endfacet
  facet normal 0.000000e+00 0.000000e+00 1.000000e+00
    outer loop
      vertex -4.586602e+01 3.658509e+01 1.876000e+00
      vertex -4.586602e+01 4.277099e+01 1.876000e+00
      vertex -5.000000e+01 5.000000e+01 1.876000e+00
    endloop
  endfacet
  facet normal 0.000000e+00 0.000000e+00 1.000000e+00
    outer loop
      vertex -3.047002e+01 4.277099e+01 1.876000e+00
      vertex -3.643597e+01 3.507298e+01 1.876000e+00
      vertex -3.047002e+01 3.658509e+01 1.876000e+00
    endloop
  endfacet
  facet normal 0.000000e+00 0.000000e+00 1.000000e+00
    outer loop
      vertex -4.413398e+01 4.277099e+01 1.876000e+00
      vertex -3.643597e+01 3.507298e+01 1.876000e+00
      vertex -3.047002e+01 4.277099e+01 1.876000e+00
    endloop
  endfacet
  facet normal 0.000000e+00 0.000000e+00 1.000000e+00
    outer loop
      vertex -4.413398e+01 4.277099e+01 1.876000e+00
      vertex -3.816802e+01 3.507298e+01 1.876000e+00
      vertex -3.643597e+01 3.507298e+01 1.876000e+00
    endloop
  endfacet
  facet normal 0.000000e+00 0.000000e+00 1.000000e+00
    outer loop
      vertex -4.413398e+01 3.658509e+01 1.876000e+00
      vertex -3.816802e+01 3.507298e+01 1.876000e+00
      vertex -4.413398e+01 4.277099e+01 1.876000e+00
    endloop
  endfacet
  facet normal 0.000000e+00 0.000000e+00 1.000000e+00
    outer loop
      vertex -4.413398e+01 3.658509e+01 1.876000e+00
      vertex -4.413398e+01 2.737498e+01 1.876000e+00
      vertex -3.816802e+01 3.507298e+01 1.876000e+00
    endloop
  endfacet
  facet normal 0.000000e+00 0.000000e+00 1.000000e+00
    outer loop
      vertex -4.586602e+01 3.658509e+01 1.876000e+00
      vertex -4.413398e+01 2.737498e+01 1.876000e+00
      vertex -4.413398e+01 3.658509e+01 1.876000e+00
    endloop
  endfacet
  facet normal 0.000000e+00 0.000000e+00 1.000000e+00
    outer loop
      vertex -4.586602e+01 3.658509e+01 1.876000e+00
      vertex -4.586602e+01 2.737498e+01 1.876000e+00
      vertex -4.413398e+01 2.737498e+01 1.876000e+00
    endloop
  endfacet
  facet normal 0.000000e+00 0.000000e+00 1.000000e+00
    outer loop
      vertex -5.000000e+01 5.000000e+01 1.876000e+00
      vertex -4.586602e+01 2.737498e+01 1.876000e+00
      vertex -4.586602e+01 3.658509e+01 1.876000e+00
    endloop
  endfacet
  facet normal 0.000000e+00 0.000000e+00 1.000000e+00
    outer loop
      vertex -5.000000e+01 5.000000e+01 1.876000e+00
      vertex -4.586602e+01 2.118908e+01 1.876000e+00
      vertex -4.586602e+01 2.737498e+01 1.876000e+00
    endloop
  endfacet
  facet normal 0.000000e+00 0.000000e+00 1.000000e+00
    outer loop
      vertex -4.586602e+01 1.967698e+01 1.876000e+00
      vertex -4.586602e+01 2.118908e+01 1.876000e+00
      vertex -5.000000e+01 5.000000e+01 1.876000e+00
    endloop
  endfacet
  facet normal 0.000000e+00 0.000000e+00 1.000000e+00
    outer loop
      vertex -1.334196e+01 -4.809295e+01 1.876000e+00
      vertex -7.376008e+00 -4.809295e+01 1.876000e+00
      vertex -1.334196e+01 -4.190705e+01 1.876000e+00
    endloop
  endfacet
  facet normal 0.000000e+00 0.000000e+00 1.000000e+00
    outer loop
      vertex -5.000000e+01 -5.000000e+01 1.876000e+00
      vertex -7.376008e+00 -4.809295e+01 1.876000e+00
      vertex -1.334196e+01 -4.809295e+01 1.876000e+00
    endloop
  endfacet
  facet normal 0.000000e+00 0.000000e+00 1.000000e+00
    outer loop
      vertex -5.000000e+01 -5.000000e+01 1.876000e+00
      vertex -5.643957e+00 -4.809295e+01 1.876000e+00
      vertex -7.376008e+00 -4.809295e+01 1.876000e+00
    endloop
  endfacet
  facet normal 0.000000e+00 0.000000e+00 1.000000e+00
    outer loop
      vertex 5.000000e+01 -5.000000e+01 1.876000e+00
      vertex -5.643957e+00 -4.809295e+01 1.876000e+00
      vertex -5.000000e+01 -5.000000e+01 1.876000e+00
    endloop
  endfacet
  facet normal 0.000000e+00 0.000000e+00 1.000000e+00
    outer loop
      vertex 5.000000e+01 -5.000000e+01 1.876000e+00
      vertex 3.111401e+01 -4.809295e+01 1.876000e+00
      vertex -5.643957e+00 -4.809295e+01 1.876000e+00
    endloop
  endfacet
  facet normal 0.000000e+00 0.000000e+00 1.000000e+00
    outer loop
      vertex 3.284606e+01 -4.809295e+01 1.876000e+00
      vertex 3.111401e+01 -4.809295e+01 1.876000e+00
      vertex 5.000000e+01 -5.000000e+01 1.876000e+00
    endloop
  endfacet
  facet normal 0.000000e+00 0.000000e+00 1.000000e+00
    outer loop
      vertex -7.376008e+00 1.349108e+01 1.876000e+00
      vertex 3.219961e-01 5.793077e+00 1.876000e+00
      vertex -5.643957e+00 1.349108e+01 1.876000e+00
    endloop
  endfacet
  facet normal 0.000000e+00 0.000000e+00 1.000000e+00
    outer loop
      vertex -1.334196e+01 5.793077e+00 1.876000e+00
      vertex 3.219961e-01 5.793077e+00 1.876000e+00
      vertex -7.376008e+00 1.349108e+01 1.876000e+00
    endloop
  endfacet
  facet normal 0.000000e+00 0.000000e+00 1.000000e+00
    outer loop
      vertex -1.334196e+01 5.793077e+00 1.876000e+00
      vertex -1.334196e+01 4.280970e+00 1.876000e+00
      vertex 3.219961e-01 5.793077e+00 1.876000e+00
    endloop
  endfacet
  facet normal 0.000000e+00 0.000000e+00 1.000000e+00
    outer loop
      vertex -1.507401e+01 5.793077e+00 1.876000e+00
      vertex -1.334196e+01 4.280970e+00 1.876000e+00
      vertex -1.334196e+01 5.793077e+00 1.876000e+00
    endloop
  endfacet
  facet normal 0.000000e+00 0.000000e+00 1.000000e+00
    outer loop
      vertex -1.507401e+01 5.793077e+00 1.876000e+00
      vertex -1.507401e+01 4.280970e+00 1.876000e+00
      vertex -1.334196e+01 4.280970e+00 1.876000e+00
    endloop
  endfacet
  facet normal 0.000000e+00 0.000000e+00 1.000000e+00
    outer loop
      vertex -2.873797e+01 5.793077e+00 1.876000e+00
      vertex -1.507401e+01 4.280970e+00 1.876000e+00
      vertex -1.507401e+01 5.793077e+00 1.876000e+00
    endloop
  endfacet
  facet normal 0.000000e+00 0.000000e+00 1.000000e+00
    outer loop
      vertex -2.873797e+01 5.793077e+00 1.876000e+00
      vertex -2.873797e+01 4.280970e+00 1.876000e+00
      vertex -1.507401e+01 4.280970e+00 1.876000e+00
    endloop
  endfacet
  facet normal 0.000000e+00 0.000000e+00 1.000000e+00
    outer loop
      vertex -3.047002e+01 5.793077e+00 1.876000e+00
      vertex -2.873797e+01 4.280970e+00 1.876000e+00
      vertex -2.873797e+01 5.793077e+00 1.876000e+00
    endloop
  endfacet
  facet normal 0.000000e+00 0.000000e+00 1.000000e+00
    outer loop
      vertex -3.047002e+01 5.793077e+00 1.876000e+00
      vertex -3.047002e+01 4.280970e+00 1.876000e+00
      vertex -2.873797e+01 4.280970e+00 1.876000e+00
    endloop
  endfacet
  facet normal 0.000000e+00 0.000000e+00 1.000000e+00
    outer loop
      vertex -4.413398e+01 5.793077e+00 1.876000e+00
      vertex -3.047002e+01 4.280970e+00 1.876000e+00
      vertex -3.047002e+01 5.793077e+00 1.876000e+00
    endloop
  endfacet
  facet normal 0.000000e+00 0.000000e+00 1.000000e+00
    outer loop
      vertex -4.413398e+01 5.793077e+00 1.876000e+00
      vertex -4.413398e+01 4.280970e+00 1.876000e+00
      vertex -3.047002e+01 4.280970e+00 1.876000e+00
    endloop
  endfacet
  facet normal 0.000000e+00 0.000000e+00 1.000000e+00
    outer loop
      vertex -4.586602e+01 5.793077e+00 1.876000e+00
      vertex -4.413398e+01 4.280970e+00 1.876000e+00
      vertex -4.413398e+01 5.793077e+00 1.876000e+00
    endloop
  endfacet
  facet normal 0.000000e+00 0.000000e+00 1.000000e+00
    outer loop
      vertex -4.586602e+01 5.793077e+00 1.876000e+00
      vertex -4.586602e+01 4.280970e+00 1.876000e+00
      vertex -4.413398e+01 4.280970e+00 1.876000e+00
    endloop
  endfacet
  facet normal 0.000000e+00 0.000000e+00 1.000000e+00
    outer loop
      vertex -5.000000e+01 5.000000e+01 1.876000e+00
      vertex -4.586602e+01 4.280970e+00 1.876000e+00
      vertex -4.586602e+01 5.793077e+00 1.876000e+00
    endloop
  endfacet
  facet normal 0.000000e+00 0.000000e+00 1.000000e+00
    outer loop
      vertex -5.000000e+01 5.000000e+01 1.876000e+00
      vertex -4.586602e+01 -1.904926e+00 1.876000e+00
      vertex -4.586602e+01 4.280970e+00 1.876000e+00
    endloop
  endfacet
  facet normal 0.000000e+00 0.000000e+00 1.000000e+00
    outer loop
      vertex -5.000000e+01 -5.000000e+01 1.876000e+00
      vertex -4.586602e+01 -1.904926e+00 1.876000e+00
      vertex -5.000000e+01 5.000000e+01 1.876000e+00
    endloop
  endfacet
  facet normal 0.000000e+00 0.000000e+00 1.000000e+00
    outer loop
      vertex -5.000000e+01 -5.000000e+01 1.876000e+00
      vertex -4.586602e+01 -3.417034e+00 1.876000e+00
      vertex -4.586602e+01 -1.904926e+00 1.876000e+00
    endloop
  endfacet
  facet normal 0.000000e+00 0.000000e+00 1.000000e+00
    outer loop
      vertex -4.586602e+01 -9.602930e+00 1.876000e+00
      vertex -4.586602e+01 -3.417034e+00 1.876000e+00
      vertex -5.000000e+01 -5.000000e+01 1.876000e+00
    endloop
  endfacet
  facet normal 0.000000e+00 0.000000e+00 1.000000e+00
    outer loop
      vertex 8.020000e+00 4.277099e+01 1.876000e+00
      vertex 2.054047e+00 4.277099e+01 1.876000e+00
      vertex 8.020000e+00 3.658509e+01 1.876000e+00
    endloop
  endfacet
  facet normal 0.000000e+00 0.000000e+00 1.000000e+00
    outer loop
      vertex 5.000000e+01 5.000000e+01 1.876000e+00
      vertex 2.054047e+00 4.277099e+01 1.876000e+00
      vertex 8.020000e+00 4.277099e+01 1.876000e+00
    endloop
  endfacet
  facet normal 0.000000e+00 0.000000e+00 1.000000e+00
    outer loop
      vertex 5.000000e+01 5.000000e+01 1.876000e+00
      vertex 3.219961e-01 4.277099e+01 1.876000e+00
      vertex 2.054047e+00 4.277099e+01 1.876000e+00
    endloop
  endfacet
  facet normal 0.000000e+00 0.000000e+00 1.000000e+00
    outer loop
      vertex -5.000000e+01 5.000000e+01 1.876000e+00
      vertex 3.219961e-01 4.277099e+01 1.876000e+00
      vertex 5.000000e+01 5.000000e+01 1.876000e+00
    endloop
  endfacet
  facet normal 0.000000e+00 0.000000e+00 1.000000e+00
    outer loop
      vertex -5.000000e+01 5.000000e+01 1.876000e+00
      vertex -2.103996e+01 4.277099e+01 1.876000e+00
      vertex 3.219961e-01 4.277099e+01 1.876000e+00
    endloop
  endfacet
  facet normal 0.000000e+00 0.000000e+00 1.000000e+00
    outer loop
      vertex -2.277201e+01 4.277099e+01 1.876000e+00
      vertex -2.103996e+01 4.277099e+01 1.876000e+00
      vertex -5.000000e+01 5.000000e+01 1.876000e+00
    endloop
  endfacet
  facet normal 0.000000e+00 0.000000e+00 1.000000e+00
    outer loop
      vertex 5.000000e+01 -5.000000e+01 1.876000e+00
      vertex 4.054406e+01 -3.417034e+00 1.876000e+00
      vertex 4.054406e+01 -9.602930e+00 1.876000e+00
    endloop
  endfacet
  facet normal 0.000000e+00 0.000000e+00 1.000000e+00
    outer loop
      vertex 5.000000e+01 -5.000000e+01 1.876000e+00
      vertex 4.054406e+01 -1.904926e+00 1.876000e+00
      vertex 4.054406e+01 -3.417034e+00 1.876000e+00
    endloop
  endfacet
  facet normal 0.000000e+00 0.000000e+00 1.000000e+00
    outer loop
      vertex 5.000000e+01 5.000000e+01 1.876000e+00
      vertex 4.054406e+01 -1.904926e+00 1.876000e+00
      vertex 5.000000e+01 -5.000000e+01 1.876000e+00
    endloop
  endfacet
  facet normal 0.000000e+00 0.000000e+00 1.000000e+00
    outer loop
      vertex 5.000000e+01 5.000000e+01 1.876000e+00
      vertex 4.054406e+01 4.280970e+00 1.876000e+00
      vertex 4.054406e+01 -1.904926e+00 1.876000e+00
    endloop
  endfacet
  facet normal 0.000000e+00 0.000000e+00 1.000000e+00
    outer loop
      vertex 4.054406e+01 5.793077e+00 1.876000e+00
      vertex 4.054406e+01 4.280970e+00 1.876000e+00
      vertex 5.000000e+01 5.000000e+01 1.876000e+00
    endloop
  endfacet
  facet normal 0.000000e+00 0.000000e+00 1.000000e+00
    outer loop
      vertex -1.334196e+01 -3.417034e+00 1.876000e+00
      vertex -3.822291e-01 -1.179021e-01 1.876000e+00
      vertex -1.334196e+01 -1.904926e+00 1.876000e+00
    endloop
  endfacet
  facet normal 0.000000e+00 0.000000e+00 1.000000e+00
    outer loop
      vertex -1.334196e+01 -3.417034e+00 1.876000e+00
      vertex -3.304955e-01 -2.253280e-01 1.876000e+00
      vertex -3.822291e-01 -1.179021e-01 1.876000e+00
    endloop
  endfacet
  facet normal 0.000000e+00 0.000000e+00 1.000000e+00
    outer loop
      vertex 3.219961e-01 -3.417034e+00 1.876000e+00
      vertex -3.304955e-01 -2.253280e-01 1.876000e+00
      vertex -1.334196e+01 -3.417034e+00 1.876000e+00
    endloop
  endfacet
  facet normal 0.000000e+00 0.000000e+00 1.000000e+00
    outer loop
      vertex 3.219961e-01 -3.417034e+00 1.876000e+00
      vertex -2.493959e-01 -3.127326e-01 1.876000e+00
      vertex -3.304955e-01 -2.253280e-01 1.876000e+00
    endloop
  endfacet
  facet normal 0.000000e+00 0.000000e+00 1.000000e+00
    outer loop
      vertex 3.219961e-01 -3.417034e+00 1.876000e+00
      vertex -1.461364e-01 -3.723495e-01 1.876000e+00
      vertex -2.493959e-01 -3.127326e-01 1.876000e+00
    endloop
  endfacet
  facet normal 0.000000e+00 0.000000e+00 1.000000e+00
    outer loop
      vertex -2.989204e-02 -3.988815e-01 1.876000e+00
      vertex -1.461364e-01 -3.723495e-01 1.876000e+00
      vertex 3.219961e-01 -3.417034e+00 1.876000e+00
    endloop
  endfacet
  facet normal 0.000000e+00 0.000000e+00 1.000000e+00
    outer loop
      vertex 3.219961e-01 -3.417034e+00 1.876000e+00
      vertex 8.900838e-02 -3.899712e-01 1.876000e+00
      vertex -2.989204e-02 -3.988815e-01 1.876000e+00
    endloop
  endfacet
  facet normal 0.000000e+00 0.000000e+00 1.000000e+00
    outer loop
      vertex 3.219961e-01 -3.417034e+00 1.876000e+00
      vertex 2.000000e-01 -3.464102e-01 1.876000e+00
      vertex 8.900838e-02 -3.899712e-01 1.876000e+00
    endloop
  endfacet
  facet normal 0.000000e+00 0.000000e+00 1.000000e+00
    outer loop
      vertex 2.054047e+00 -3.417034e+00 1.876000e+00
      vertex 2.000000e-01 -3.464102e-01 1.876000e+00
      vertex 3.219961e-01 -3.417034e+00 1.876000e+00
    endloop
  endfacet
  facet normal 0.000000e+00 0.000000e+00 1.000000e+00
    outer loop
      vertex 2.054047e+00 -3.417034e+00 1.876000e+00
      vertex 2.932208e-01 -2.720691e-01 1.876000e+00
      vertex 2.000000e-01 -3.464102e-01 1.876000e+00
    endloop
  endfacet
  facet normal 0.000000e+00 0.000000e+00 1.000000e+00
    outer loop
      vertex 2.054047e+00 -3.417034e+00 1.876000e+00
      vertex 3.603875e-01 -1.735535e-01 1.876000e+00
      vertex 2.932208e-01 -2.720691e-01 1.876000e+00
    endloop
  endfacet
  facet normal 0.000000e+00 0.000000e+00 1.000000e+00
    outer loop
      vertex 3.955323e-01 -5.961690e-02 1.876000e+00
      vertex 3.603875e-01 -1.735535e-01 1.876000e+00
      vertex 2.054047e+00 -3.417034e+00 1.876000e+00
    endloop
  endfacet
  facet normal 0.000000e+00 0.000000e+00 1.000000e+00
    outer loop
      vertex 8.020000e+00 -3.417034e+00 1.876000e+00
      vertex 2.054047e+00 -3.417034e+00 1.876000e+00
      vertex 8.020000e+00 -9.602930e+00 1.876000e+00
    endloop
  endfacet
  facet normal 0.000000e+00 0.000000e+00 1.000000e+00
    outer loop
      vertex 8.020000e+00 -1.904926e+00 1.876000e+00
      vertex 2.054047e+00 -3.417034e+00 1.876000e+00
      vertex 8.020000e+00 -3.417034e+00 1.876000e+00
    endloop
  endfacet
  facet normal 0.000000e+00 0.000000e+00 1.000000e+00
    outer loop
      vertex 8.020000e+00 -1.904926e+00 1.876000e+00
      vertex 3.955323e-01 -5.961690e-02 1.876000e+00
      vertex 2.054047e+00 -3.417034e+00 1.876000e+00
    endloop
  endfacet
  facet normal 0.000000e+00 0.000000e+00 1.000000e+00
    outer loop
      vertex 3.955323e-01 5.961690e-02 1.876000e+00
      vertex 3.955323e-01 -5.961690e-02 1.876000e+00
      vertex 8.020000e+00 -1.904926e+00 1.876000e+00
    endloop
  endfacet
  facet normal 0.000000e+00 0.000000e+00 1.000000e+00
    outer loop
      vertex 8.020000e+00 4.280970e+00 1.876000e+00
      vertex 3.955323e-01 5.961690e-02 1.876000e+00
      vertex 8.020000e+00 -1.904926e+00 1.876000e+00
    endloop
  endfacet
  facet normal 0.000000e+00 0.000000e+00 1.000000e+00
    outer loop
      vertex 3.603875e-01 1.735535e-01 1.876000e+00
      vertex 3.955323e-01 5.961690e-02 1.876000e+00
      vertex 8.020000e+00 4.280970e+00 1.876000e+00
    endloop
  endfacet
  facet normal 0.000000e+00 0.000000e+00 1.000000e+00
    outer loop
      vertex 4.054406e+01 4.277099e+01 1.876000e+00
      vertex 5.000000e+01 5.000000e+01 1.876000e+00
      vertex 3.881202e+01 4.277099e+01 1.876000e+00
    endloop
  endfacet
  facet normal 0.000000e+00 0.000000e+00 1.000000e+00
    outer loop
      vertex 4.054406e+01 3.658509e+01 1.876000e+00
      vertex 5.000000e+01 5.000000e+01 1.876000e+00
      vertex 4.054406e+01 4.277099e+01 1.876000e+00
    endloop
  endfacet
  facet normal 0.000000e+00 0.000000e+00 1.000000e+00
    outer loop
      vertex 4.054406e+01 3.658509e+01 1.876000e+00
      vertex 4.054406e+01 1.967698e+01 1.876000e+00
      vertex 5.000000e+01 5.000000e+01 1.876000e+00
    endloop
  endfacet
  facet normal 0.000000e+00 0.000000e+00 1.000000e+00
    outer loop
      vertex 3.284606e+01 2.737498e+01 1.876000e+00
      vertex 4.054406e+01 1.967698e+01 1.876000e+00
      vertex 4.054406e+01 3.658509e+01 1.876000e+00
    endloop
  endfacet
  facet normal 0.000000e+00 0.000000e+00 1.000000e+00
    outer loop
      vertex 3.284606e+01 2.737498e+01 1.876000e+00
      vertex 3.881202e+01 1.967698e+01 1.876000e+00
      vertex 4.054406e+01 1.967698e+01 1.876000e+00
    endloop
  endfacet
  facet normal 0.000000e+00 0.000000e+00 1.000000e+00
    outer loop
      vertex 3.284606e+01 2.118908e+01 1.876000e+00
      vertex 3.881202e+01 1.967698e+01 1.876000e+00
      vertex 3.284606e+01 2.737498e+01 1.876000e+00
    endloop
  endfacet
  facet normal 0.000000e+00 0.000000e+00 1.000000e+00
    outer loop
      vertex 3.284606e+01 2.118908e+01 1.876000e+00
      vertex 3.881202e+01 1.349108e+01 1.876000e+00
      vertex 3.881202e+01 1.967698e+01 1.876000e+00
    endloop
  endfacet
  facet normal 0.000000e+00 0.000000e+00 1.000000e+00
    outer loop
      vertex 3.111401e+01 2.118908e+01 1.876000e+00
      vertex 3.881202e+01 1.349108e+01 1.876000e+00
      vertex 3.284606e+01 2.118908e+01 1.876000e+00
    endloop
  endfacet
  facet normal 0.000000e+00 0.000000e+00 1.000000e+00
    outer loop
      vertex 3.111401e+01 2.118908e+01 1.876000e+00
      vertex 2.514806e+01 1.197897e+01 1.876000e+00
      vertex 3.881202e+01 1.349108e+01 1.876000e+00
    endloop
  endfacet
  facet normal 0.000000e+00 0.000000e+00 1.000000e+00
    outer loop
      vertex 1.745005e+01 1.967698e+01 1.876000e+00
      vertex 2.514806e+01 1.197897e+01 1.876000e+00
      vertex 3.111401e+01 2.118908e+01 1.876000e+00
    endloop
  endfacet
  facet normal 0.000000e+00 0.000000e+00 1.000000e+00
    outer loop
      vertex 1.745005e+01 1.967698e+01 1.876000e+00
      vertex 2.341601e+01 1.197897e+01 1.876000e+00
      vertex 2.514806e+01 1.197897e+01 1.876000e+00
    endloop
  endfacet
  facet normal 0.000000e+00 0.000000e+00 1.000000e+00
    outer loop
      vertex 1.745005e+01 1.349108e+01 1.876000e+00
      vertex 2.341601e+01 1.197897e+01 1.876000e+00
      vertex 1.745005e+01 1.967698e+01 1.876000e+00
    endloop
  endfacet
  facet normal 0.000000e+00 0.000000e+00 1.000000e+00
    outer loop
      vertex 1.745005e+01 1.349108e+01 1.876000e+00
      vertex 2.341601e+01 5.793077e+00 1.876000e+00
      vertex 2.341601e+01 1.197897e+01 1.876000e+00
    endloop
  endfacet
  facet normal 0.000000e+00 0.000000e+00 1.000000e+00
    outer loop
      vertex 1.571800e+01 1.349108e+01 1.876000e+00
      vertex 2.341601e+01 5.793077e+00 1.876000e+00
      vertex 1.745005e+01 1.349108e+01 1.876000e+00
    endloop
  endfacet
  facet normal 0.000000e+00 0.000000e+00 1.000000e+00
    outer loop
      vertex 1.571800e+01 1.349108e+01 1.876000e+00
      vertex 9.752050e+00 4.280970e+00 1.876000e+00
      vertex 2.341601e+01 5.793077e+00 1.876000e+00
    endloop
  endfacet
  facet normal 0.000000e+00 0.000000e+00 1.000000e+00
    outer loop
      vertex 2.054047e+00 1.197897e+01 1.876000e+00
      vertex 9.752050e+00 4.280970e+00 1.876000e+00
      vertex 1.571800e+01 1.349108e+01 1.876000e+00
    endloop
  endfacet
  facet normal 0.000000e+00 0.000000e+00 1.000000e+00
    outer loop
      vertex 2.054047e+00 1.197897e+01 1.876000e+00
      vertex 8.020000e+00 4.280970e+00 1.876000e+00
      vertex 9.752050e+00 4.280970e+00 1.876000e+00
    endloop
  endfacet
  facet normal 0.000000e+00 0.000000e+00 1.000000e+00
    outer loop
      vertex 2.054047e+00 5.793077e+00 1.876000e+00
      vertex 8.020000e+00 4.280970e+00 1.876000e+00
      vertex 2.054047e+00 1.197897e+01 1.876000e+00
    endloop
  endfacet
  facet normal 0.000000e+00 0.000000e+00 1.000000e+00
    outer loop
      vertex 2.054047e+00 5.793077e+00 1.876000e+00
      vertex 3.603875e-01 1.735535e-01 1.876000e+00
      vertex 8.020000e+00 4.280970e+00 1.876000e+00
    endloop
  endfacet
  facet normal 0.000000e+00 0.000000e+00 1.000000e+00
    outer loop
      vertex 2.932208e-01 2.720691e-01 1.876000e+00
      vertex 3.603875e-01 1.735535e-01 1.876000e+00
      vertex 2.054047e+00 5.793077e+00 1.876000e+00
    endloop
  endfacet
  facet normal 0.000000e+00 0.000000e+00 1.000000e+00
    outer loop
      vertex 2.054047e+00 5.793077e+00 1.876000e+00
      vertex 2.000000e-01 3.464102e-01 1.876000e+00
      vertex 2.932208e-01 2.720691e-01 1.876000e+00
    endloop
  endfacet
  facet normal 0.000000e+00 0.000000e+00 1.000000e+00
    outer loop
      vertex 2.054047e+00 5.793077e+00 1.876000e+00
      vertex 8.900838e-02 3.899712e-01 1.876000e+00
      vertex 2.000000e-01 3.464102e-01 1.876000e+00
    endloop
  endfacet
  facet normal 0.000000e+00 0.000000e+00 1.000000e+00
    outer loop
      vertex 3.219961e-01 5.793077e+00 1.876000e+00
      vertex 8.900838e-02 3.899712e-01 1.876000e+00
      vertex 2.054047e+00 5.793077e+00 1.876000e+00
    endloop
  endfacet
  facet normal 0.000000e+00 0.000000e+00 1.000000e+00
    outer loop
      vertex 3.219961e-01 5.793077e+00 1.876000e+00
      vertex -2.989204e-02 3.988815e-01 1.876000e+00
      vertex 8.900838e-02 3.899712e-01 1.876000e+00
    endloop
  endfacet
  facet normal 0.000000e+00 0.000000e+00 1.000000e+00
    outer loop
      vertex -1.461364e-01 3.723495e-01 1.876000e+00
      vertex -2.989204e-02 3.988815e-01 1.876000e+00
      vertex 3.219961e-01 5.793077e+00 1.876000e+00
    endloop
  endfacet
  facet normal 0.000000e+00 0.000000e+00 1.000000e+00
    outer loop
      vertex 3.219961e-01 5.793077e+00 1.876000e+00
      vertex -2.493959e-01 3.127326e-01 1.876000e+00
      vertex -1.461364e-01 3.723495e-01 1.876000e+00
    endloop
  endfacet
  facet normal 0.000000e+00 0.000000e+00 1.000000e+00
    outer loop
      vertex 3.219961e-01 5.793077e+00 1.876000e+00
      vertex -3.304955e-01 2.253280e-01 1.876000e+00
      vertex -2.493959e-01 3.127326e-01 1.876000e+00
    endloop
  endfacet
  facet normal 0.000000e+00 0.000000e+00 1.000000e+00
    outer loop
      vertex -1.334196e+01 4.280970e+00 1.876000e+00
      vertex -3.304955e-01 2.253280e-01 1.876000e+00
      vertex 3.219961e-01 5.793077e+00 1.876000e+00
    endloop
  endfacet
  facet normal 0.000000e+00 0.000000e+00 1.000000e+00
    outer loop
      vertex -1.334196e+01 4.280970e+00 1.876000e+00
      vertex -3.822291e-01 1.179021e-01 1.876000e+00
      vertex -3.304955e-01 2.253280e-01 1.876000e+00
    endloop
  endfacet
  facet normal 0.000000e+00 0.000000e+00 1.000000e+00
    outer loop
      vertex -1.334196e+01 -1.904926e+00 1.876000e+00
      vertex -3.822291e-01 1.179021e-01 1.876000e+00
      vertex -1.334196e+01 4.280970e+00 1.876000e+00
    endloop
  endfacet
  facet normal 0.000000e+00 0.000000e+00 1.000000e+00
    outer loop
      vertex -1.334196e+01 -1.904926e+00 1.876000e+00
      vertex -4.000000e-01 4.898587e-17 1.876000e+00
      vertex -3.822291e-01 1.179021e-01 1.876000e+00
    endloop
  endfacet
  facet normal 0.000000e+00 0.000000e+00 1.000000e+00
    outer loop
      vertex -3.822291e-01 -1.179021e-01 1.876000e+00
      vertex -4.000000e-01 4.898587e-17 1.876000e+00
      vertex -1.334196e+01 -1.904926e+00 1.876000e+00
    endloop
  endfacet
  facet normal 0.000000e+00 0.000000e+00 1.000000e+00
    outer loop
      vertex -5.000000e+01 -5.000000e+01 -1.524000e+00
      vertex -4.364429e-01 -5.472820e-01 -1.524000e+00
      vertex -5.783671e-01 -3.943240e-01 -1.524000e+00
    endloop
  endfacet
  facet normal 0.000000e+00 0.000000e+00 1.000000e+00
    outer loop
      vertex -5.000000e+01 -5.000000e+01 -1.524000e+00
      vertex -2.557387e-01 -6.516116e-01 -1.524000e+00
      vertex -4.364429e-01 -5.472820e-01 -1.524000e+00
    endloop
  endfacet
  facet normal 0.000000e+00 0.000000e+00 1.000000e+00
    outer loop
      vertex -5.231107e-02 -6.980426e-01 -1.524000e+00
      vertex -2.557387e-01 -6.516116e-01 -1.524000e+00
      vertex -5.000000e+01 -5.000000e+01 -1.524000e+00
    endloop
  endfacet
  facet normal 0.000000e+00 0.000000e+00 1.000000e+00
    outer loop
      vertex 5.000000e+01 -5.000000e+01 -1.524000e+00
      vertex -5.231107e-02 -6.980426e-01 -1.524000e+00
      vertex -5.000000e+01 -5.000000e+01 -1.524000e+00
    endloop
  endfacet
  facet normal 0.000000e+00 0.000000e+00 1.000000e+00
    outer loop
      vertex 1.557647e-01 -6.824495e-01 -1.524000e+00
      vertex -5.231107e-02 -6.980426e-01 -1.524000e+00
      vertex 5.000000e+01 -5.000000e+01 -1.524000e+00
    endloop
  endfacet
  facet normal 0.000000e+00 0.000000e+00 1.000000e+00
    outer loop
      vertex 5.000000e+01 -5.000000e+01 -1.524000e+00
      vertex 3.500000e-01 -6.062178e-01 -1.524000e+00
      vertex 1.557647e-01 -6.824495e-01 -1.524000e+00
    endloop
  endfacet
  facet normal 0.000000e+00 0.000000e+00 1.000000e+00
    outer loop
      vertex 5.000000e+01 -5.000000e+01 -1.524000e+00
      vertex 5.131363e-01 -4.761209e-01 -1.524000e+00
      vertex 3.500000e-01 -6.062178e-01 -1.524000e+00
    endloop
  endfacet
  facet normal 0.000000e+00 0.000000e+00 1.000000e+00
    outer loop
      vertex 6.306782e-01 -3.037186e-01 -1.524000e+00
      vertex 5.131363e-01 -4.761209e-01 -1.524000e+00
      vertex 5.000000e+01 -5.000000e+01 -1.524000e+00
    endloop
  endfacet
  facet normal 0.000000e+00 0.000000e+00 1.000000e+00
    outer loop
      vertex 5.000000e+01 -5.000000e+01 -1.524000e+00
      vertex 6.921816e-01 -1.043296e-01 -1.524000e+00
      vertex 6.306782e-01 -3.037186e-01 -1.524000e+00
    endloop
  endfacet
  facet normal 0.000000e+00 0.000000e+00 1.000000e+00
    outer loop
      vertex 5.000000e+01 -5.000000e+01 -1.524000e+00
      vertex 6.921816e-01 1.043296e-01 -1.524000e+00
      vertex 6.921816e-01 -1.043296e-01 -1.524000e+00
    endloop
  endfacet
  facet normal 0.000000e+00 0.000000e+00 1.000000e+00
    outer loop
      vertex 5.000000e+01 5.000000e+01 -1.524000e+00
      vertex 6.921816e-01 1.043296e-01 -1.524000e+00
      vertex 5.000000e+01 -5.000000e+01 -1.524000e+00
    endloop
  endfacet
  facet normal 0.000000e+00 0.000000e+00 1.000000e+00
    outer loop
      vertex 5.000000e+01 5.000000e+01 -1.524000e+00
      vertex 6.306782e-01 3.037186e-01 -1.524000e+00
      vertex 6.921816e-01 1.043296e-01 -1.524000e+00
    endloop
  endfacet
  facet normal 0.000000e+00 0.000000e+00 1.000000e+00
    outer loop
      vertex 5.131363e-01 4.761209e-01 -1.524000e+00
      vertex 6.306782e-01 3.037186e-01 -1.524000e+00
      vertex 5.000000e+01 5.000000e+01 -1.524000e+00
    endloop
  endfacet
  facet normal 0.000000e+00 0.000000e+00 1.000000e+00
    outer loop
      vertex 5.000000e+01 5.000000e+01 -1.524000e+00
      vertex 3.500000e-01 6.062178e-01 -1.524000e+00
      vertex 5.131363e-01 4.761209e-01 -1.524000e+00
    endloop
  endfacet
  facet normal 0.000000e+00 0.000000e+00 1.000000e+00
    outer loop
      vertex 5.000000e+01 5.000000e+01 -1.524000e+00
      vertex 1.557647e-01 6.824495e-01 -1.524000e+00
      vertex 3.500000e-01 6.062178e-01 -1.524000e+00
    endloop
  endfacet
  facet normal 0.000000e+00 0.000000e+00 1.000000e+00
    outer loop
      vertex -5.231107e-02 6.980426e-01 -1.524000e+00
      vertex 1.557647e-01 6.824495e-01 -1.524000e+00
      vertex 5.000000e+01 5.000000e+01 -1.524000e+00
    endloop
  endfacet
  facet normal 0.000000e+00 0.000000e+00 1.000000e+00
    outer loop
      vertex -5.000000e+01 5.000000e+01 -1.524000e+00
      vertex -5.231107e-02 6.980426e-01 -1.524000e+00
      vertex 5.000000e+01 5.000000e+01 -1.524000e+00
    endloop
  endfacet
  facet normal 0.000000e+00 0.000000e+00 1.000000e+00
    outer loop
      vertex -2.557387e-01 6.516116e-01 -1.524000e+00
      vertex -5.231107e-02 6.980426e-01 -1.524000e+00
      vertex -5.000000e+01 5.000000e+01 -1.524000e+00
    endloop
  endfacet
  facet normal 0.000000e+00 0.000000e+00 1.000000e+00
    outer loop
      vertex -5.000000e+01 5.000000e+01 -1.524000e+00
      vertex -4.364429e-01 5.472820e-01 -1.524000e+00
      vertex -2.557387e-01 6.516116e-01 -1.524000e+00
    endloop
  endfacet
  facet normal 0.000000e+00 0.000000e+00 1.000000e+00
    outer loop
      vertex -5.000000e+01 5.000000e+01 -1.524000e+00
      vertex -5.783671e-01 3.943240e-01 -1.524000e+00
      vertex -4.364429e-01 5.472820e-01 -1.524000e+00
    endloop
  endfacet
  facet normal 0.000000e+00 0.000000e+00 1.000000e+00
    outer loop
      vertex -6.689010e-01 2.063286e-01 -1.524000e+00
      vertex -5.783671e-01 3.943240e-01 -1.524000e+00
      vertex -5.000000e+01 5.000000e+01 -1.524000e+00
    endloop
  endfacet
  facet normal 0.000000e+00 0.000000e+00 1.000000e+00
    outer loop
      vertex -6.689010e-01 -2.063286e-01 -1.524000e+00
      vertex -5.000000e+01 -5.000000e+01 -1.524000e+00
      vertex -5.783671e-01 -3.943240e-01 -1.524000e+00
    endloop
  endfacet
  facet normal 0.000000e+00 0.000000e+00 1.000000e+00
    outer loop
      vertex -7.000000e-01 8.572527e-17 -1.524000e+00
      vertex -5.000000e+01 -5.000000e+01 -1.524000e+00
      vertex -6.689010e-01 -2.063286e-01 -1.524000e+00
    endloop
  endfacet
  facet normal 0.000000e+00 0.000000e+00 1.000000e+00
    outer loop
      vertex -7.000000e-01 8.572527e-17 -1.524000e+00
      vertex -5.000000e+01 5.000000e+01 -1.524000e+00
      vertex -5.000000e+01 -5.000000e+01 -1.524000e+00
    endloop
  endfacet
  facet normal 0.000000e+00 0.000000e+00 1.000000e+00
    outer loop
      vertex -6.689010e-01 2.063286e-01 -1.524000e+00
      vertex -5.000000e+01 5.000000e+01 -1.524000e+00
      vertex -7.000000e-01 8.572527e-17 -1.524000e+00
    endloop
  endfacet
  facet normal 9.703819e-01 -1.965034e-01 0.000000e+00
    outer loop
      vertex -6.689010e-01 2.063286e-01 -1.924000e+00
      vertex -6.689010e-01 2.063286e-01 -1.524000e+00
      vertex -7.000000e-01 8.572527e-17 -1.524000e+00
    endloop
  endfacet
  facet normal 9.124615e-01 -3.842768e-01 -0.000000e+00
    outer loop
      vertex -5.783671e-01 3.943240e-01 -1.924000e+00
      vertex -6.689010e-01 2.063286e-01 -1.524000e+00
      vertex -6.689010e-01 2.063286e-01 -1.924000e+00
    endloop
  endfacet
  facet normal 8.693501e-01 -4.737984e-01 -0.000000e+00
    outer loop
      vertex -5.783671e-01 3.943240e-01 -1.924000e+00
      vertex -5.783671e-01 3.943240e-01 -1.524000e+00
      vertex -6.689010e-01 2.063286e-01 -1.524000e+00
    endloop
  endfacet
  facet normal 7.586557e-01 -6.361572e-01 -0.000000e+00
    outer loop
      vertex -4.364429e-01 5.472820e-01 -1.924000e+00
      vertex -5.783671e-01 3.943240e-01 -1.524000e+00
      vertex -5.783671e-01 3.943240e-01 -1.924000e+00
    endloop
  endfacet
  facet normal 6.910728e-01 -7.089944e-01 -0.000000e+00
    outer loop
      vertex -4.364429e-01 5.472820e-01 -1.924000e+00
      vertex -4.364429e-01 5.472820e-01 -1.524000e+00
      vertex -5.783671e-01 3.943240e-01 -1.524000e+00
    endloop
  endfacet
  facet normal 5.374402e-01 -8.315123e-01 -0.000000e+00
    outer loop
      vertex -2.557387e-01 6.516116e-01 -1.924000e+00
      vertex -4.364429e-01 5.472820e-01 -1.524000e+00
      vertex -4.364429e-01 5.472820e-01 -1.924000e+00
    endloop
  endfacet
  facet normal 4.513906e-01 -8.811930e-01 -0.000000e+00
    outer loop
      vertex -2.557387e-01 6.516116e-01 -1.924000e+00
      vertex -2.557387e-01 6.516116e-01 -1.524000e+00
      vertex -4.364429e-01 5.472820e-01 -1.524000e+00
    endloop
  endfacet
  facet normal 2.684707e-01 -9.529838e-01 -0.000000e+00
    outer loop
      vertex -5.231107e-02 6.980426e-01 -1.924000e+00
      vertex -2.557387e-01 6.516116e-01 -1.524000e+00
      vertex -2.557387e-01 6.516116e-01 -1.924000e+00
    endloop
  endfacet
  facet normal 1.716004e-01 -9.750938e-01 -0.000000e+00
    outer loop
      vertex -5.231107e-02 6.980426e-01 -1.924000e+00
      vertex -5.231107e-02 6.980426e-01 -1.524000e+00
      vertex -2.557387e-01 6.516116e-01 -1.524000e+00
    endloop
  endfacet
  facet normal -2.435359e-02 -9.897785e-01 -0.000000e+00
    outer loop
      vertex 1.557647e-01 6.824495e-01 -1.924000e+00
      vertex -5.231107e-02 6.980426e-01 -1.524000e+00
      vertex -5.231107e-02 6.980426e-01 -1.924000e+00
    endloop
  endfacet
  facet normal -1.234373e-01 -9.823532e-01 -0.000000e+00
    outer loop
      vertex 1.557647e-01 6.824495e-01 -1.924000e+00
      vertex 1.557647e-01 6.824495e-01 -1.524000e+00
      vertex -5.231107e-02 6.980426e-01 -1.524000e+00
    endloop
  endfacet
  facet normal -3.150140e-01 -9.386271e-01 -0.000000e+00
    outer loop
      vertex 3.500000e-01 6.062178e-01 -1.924000e+00
      vertex 1.557647e-01 6.824495e-01 -1.524000e+00
      vertex 1.557647e-01 6.824495e-01 -1.924000e+00
    endloop
  endfacet
  facet normal -4.075070e-01 -9.023263e-01 -0.000000e+00
    outer loop
      vertex 3.500000e-01 6.062178e-01 -1.924000e+00
      vertex 3.500000e-01 6.062178e-01 -1.524000e+00
      vertex 1.557647e-01 6.824495e-01 -1.524000e+00
    endloop
  endfacet
  facet normal -5.776840e-01 -8.040745e-01 -0.000000e+00
    outer loop
      vertex 5.131363e-01 4.761209e-01 -1.924000e+00
      vertex 3.500000e-01 6.062178e-01 -1.524000e+00
      vertex 3.500000e-01 6.062178e-01 -1.924000e+00
    endloop
  endfacet
  facet normal -6.553679e-01 -7.421236e-01 -0.000000e+00
    outer loop
      vertex 5.131363e-01 4.761209e-01 -1.924000e+00
      vertex 5.131363e-01 4.761209e-01 -1.524000e+00
      vertex 3.500000e-01 6.062178e-01 -1.524000e+00
    endloop
  endfacet
  facet normal -7.890242e-01 -5.980764e-01 -0.000000e+00
    outer loop
      vertex 6.306782e-01 3.037186e-01 -1.924000e+00
      vertex 5.131363e-01 4.761209e-01 -1.524000e+00
      vertex 5.131363e-01 4.761209e-01 -1.924000e+00
    endloop
  endfacet
  facet normal -8.449965e-01 -5.159801e-01 -0.000000e+00
    outer loop
      vertex 6.306782e-01 3.037186e-01 -1.924000e+00
      vertex 6.306782e-01 3.037186e-01 -1.524000e+00
      vertex 5.131363e-01 4.761209e-01 -1.524000e+00
    endloop
  endfacet
  facet normal -9.302561e-01 -3.389366e-01 -0.000000e+00
    outer loop
      vertex 6.921816e-01 1.043296e-01 -1.924000e+00
      vertex 6.306782e-01 3.037186e-01 -1.524000e+00
      vertex 6.306782e-01 3.037186e-01 -1.924000e+00
    endloop
  endfacet
  facet normal -9.595435e-01 -2.439894e-01 -0.000000e+00
    outer loop
      vertex 6.921816e-01 1.043296e-01 -1.924000e+00
      vertex 6.921816e-01 1.043296e-01 -1.524000e+00
      vertex 6.306782e-01 3.037186e-01 -1.524000e+00
    endloop
  endfacet
  facet normal -9.888308e-01 -4.968075e-02 -0.000000e+00
    outer loop
      vertex 6.921816e-01 -1.043296e-01 -1.924000e+00
      vertex 6.921816e-01 1.043296e-01 -1.524000e+00
      vertex 6.921816e-01 1.043296e-01 -1.924000e+00
    endloop
  endfacet
  facet normal -9.888308e-01 4.968075e-02 -0.000000e+00
    outer loop
      vertex 6.921816e-01 -1.043296e-01 -1.924000e+00
      vertex 6.921816e-01 -1.043296e-01 -1.524000e+00
      vertex 6.921816e-01 1.043296e-01 -1.524000e+00
    endloop
  endfacet
  facet normal -9.595435e-01 2.439894e-01 -0.000000e+00
    outer loop
      vertex 6.306782e-01 -3.037186e-01 -1.924000e+00
      vertex 6.921816e-01 -1.043296e-01 -1.524000e+00
      vertex 6.921816e-01 -1.043296e-01 -1.924000e+00
    endloop
  endfacet
  facet normal -9.302562e-01 3.389366e-01 -0.000000e+00
    outer loop
      vertex 6.306782e-01 -3.037186e-01 -1.924000e+00
      vertex 6.306782e-01 -3.037186e-01 -1.524000e+00
      vertex 6.921816e-01 -1.043296e-01 -1.524000e+00
    endloop
  endfacet
  facet normal -8.449965e-01 5.159801e-01 -0.000000e+00
    outer loop
      vertex 5.131363e-01 -4.761209e-01 -1.924000e+00
      vertex 6.306782e-01 -3.037186e-01 -1.524000e+00
      vertex 6.306782e-01 -3.037186e-01 -1.924000e+00
    endloop
  endfacet
  facet normal -7.890242e-01 5.980764e-01 -0.000000e+00
    outer loop
      vertex 5.131363e-01 -4.761209e-01 -1.924000e+00
      vertex 5.131363e-01 -4.761209e-01 -1.524000e+00
      vertex 6.306782e-01 -3.037186e-01 -1.524000e+00
    endloop
  endfacet
  facet normal -6.553679e-01 7.421236e-01 -0.000000e+00
    outer loop
      vertex 3.500000e-01 -6.062178e-01 -1.924000e+00
      vertex 5.131363e-01 -4.761209e-01 -1.524000e+00
      vertex 5.131363e-01 -4.761209e-01 -1.924000e+00
    endloop
  endfacet
  facet normal -5.776840e-01 8.040745e-01 -0.000000e+00
    outer loop
      vertex 3.500000e-01 -6.062178e-01 -1.924000e+00
      vertex 3.500000e-01 -6.062178e-01 -1.524000e+00
      vertex 5.131363e-01 -4.761209e-01 -1.524000e+00
    endloop
  endfacet
  facet normal -4.075070e-01 9.023263e-01 -0.000000e+00
    outer loop
      vertex 1.557647e-01 -6.824495e-01 -1.924000e+00
      vertex 3.500000e-01 -6.062178e-01 -1.524000e+00
      vertex 3.500000e-01 -6.062178e-01 -1.924000e+00
    endloop
  endfacet
  facet normal -3.150140e-01 9.386271e-01 -0.000000e+00
    outer loop
      vertex 1.557647e-01 -6.824495e-01 -1.924000e+00
      vertex 1.557647e-01 -6.824495e-01 -1.524000e+00
      vertex 3.500000e-01 -6.062178e-01 -1.524000e+00
    endloop
  endfacet
  facet normal -1.234373e-01 9.823532e-01 -0.000000e+00
    outer loop
      vertex -5.231107e-02 -6.980426e-01 -1.924000e+00
      vertex 1.557647e-01 -6.824495e-01 -1.524000e+00
      vertex 1.557647e-01 -6.824495e-01 -1.924000e+00
    endloop
  endfacet
  facet normal -2.435358e-02 9.897785e-01 -0.000000e+00
    outer loop
      vertex -5.231107e-02 -6.980426e-01 -1.924000e+00
      vertex -5.231107e-02 -6.980426e-01 -1.524000e+00
      vertex 1.557647e-01 -6.824495e-01 -1.524000e+00
    endloop
  endfacet
  facet normal 1.716004e-01 9.750938e-01 -0.000000e+00
    outer loop
      vertex -2.557387e-01 -6.516116e-01 -1.924000e+00
      vertex -5.231107e-02 -6.980426e-01 -1.524000e+00
      vertex -5.231107e-02 -6.980426e-01 -1.924000e+00
    endloop
  endfacet
  facet normal 2.684707e-01 9.529838e-01 -0.000000e+00
    outer loop
      vertex -2.557387e-01 -6.516116e-01 -1.924000e+00
      vertex -2.557387e-01 -6.516116e-01 -1.524000e+00
      vertex -5.231107e-02 -6.980426e-01 -1.524000e+00
    endloop
  endfacet
  facet normal 4.513906e-01 8.811930e-01 -0.000000e+00
    outer loop
      vertex -4.364429e-01 -5.472820e-01 -1.924000e+00
      vertex -2.557387e-01 -6.516116e-01 -1.524000e+00
      vertex -2.557387e-01 -6.516116e-01 -1.924000e+00
    endloop
  endfacet
  facet normal 5.374402e-01 8.315123e-01 -0.000000e+00
    outer loop
      vertex -4.364429e-01 -5.472820e-01 -1.924000e+00
      vertex -4.364429e-01 -5.472820e-01 -1.524000e+00
      vertex -2.557387e-01 -6.516116e-01 -1.524000e+00
    endloop
  endfacet
  facet normal 6.910728e-01 7.089944e-01 -0.000000e+00
    outer loop
      vertex -5.783671e-01 -3.943240e-01 -1.924000e+00
      vertex -4.364429e-01 -5.472820e-01 -1.524000e+00
      vertex -4.364429e-01 -5.472820e-01 -1.924000e+00
    endloop
  endfacet
  facet normal 7.586558e-01 6.361572e-01 -0.000000e+00
    outer loop
      vertex -5.783671e-01 -3.943240e-01 -1.924000e+00
      vertex -5.783671e-01 -3.943240e-01 -1.524000e+00
      vertex -4.364429e-01 -5.472820e-01 -1.524000e+00
    endloop
  endfacet
  facet normal 8.693501e-01 4.737984e-01 -0.000000e+00
    outer loop
      vertex -6.689010e-01 -2.063286e-01 -1.924000e+00
      vertex -5.783671e-01 -3.943240e-01 -1.524000e+00
      vertex -5.783671e-01 -3.943240e-01 -1.924000e+00
    endloop
  endfacet
  facet normal 9.124615e-01 3.842768e-01 -0.000000e+00
    outer loop
      vertex -6.689010e-01 -2.063286e-01 -1.924000e+00
      vertex -6.689010e-01 -2.063286e-01 -1.524000e+00
      vertex -5.783671e-01 -3.943240e-01 -1.524000e+00
    endloop
  endfacet
  facet normal 9.703819e-01 1.965034e-01 0.000000e+00
    outer loop
      vertex -7.000000e-01 8.572527e-17 -1.924000e+00
      vertex -6.689010e-01 -2.063286e-01 -1.524000e+00
      vertex -6.689010e-01 -2.063286e-01 -1.924000e+00
    endloop
  endfacet
  facet normal 9.851909e-01 9.825172e-02 0.000000e+00
    outer loop
      vertex -7.000000e-01 8.572527e-17 -1.924000e+00
      vertex -7.000000e-01 8.572527e-17 -1.524000e+00
      vertex -6.689010e-01 -2.063286e-01 -1.524000e+00
    endloop
  endfacet
  facet normal 9.851909e-01 -9.825172e-02 0.000000e+00
    outer loop
      vertex -6.689010e-01 2.063286e-01 -1.924000e+00
      vertex -7.000000e-01 8.572527e-17 -1.524000e+00
      vertex -7.000000e-01 8.572527e-17 -1.924000e+00
    endloop
  endfacet
  facet normal -0.000000e+00 -0.000000e+00 -1.000000e+00
    outer loop
      vertex -4.364429e-01 5.472820e-01 -1.924000e+00
      vertex -5.783671e-01 3.943240e-01 -1.924000e+00
      vertex -5.000000e+01 5.000000e+01 -1.924000e+00
    endloop
  endfacet
  facet normal -0.000000e+00 -0.000000e+00 -1.000000e+00
    outer loop
      vertex -5.000000e+01 5.000000e+01 -1.924000e+00
      vertex -2.557387e-01 6.516116e-01 -1.924000e+00
      vertex -4.364429e-01 5.472820e-01 -1.924000e+00
    endloop
  endfacet
  facet normal -0.000000e+00 -0.000000e+00 -1.000000e+00
    outer loop
      vertex -5.000000e+01 5.000000e+01 -1.924000e+00
      vertex -5.231107e-02 6.980426e-01 -1.924000e+00
      vertex -2.557387e-01 6.516116e-01 -1.924000e+00
    endloop
  endfacet
  facet normal -0.000000e+00 -0.000000e+00 -1.000000e+00
    outer loop
      vertex 5.000000e+01 5.000000e+01 -1.924000e+00
      vertex -5.231107e-02 6.980426e-01 -1.924000e+00
      vertex -5.000000e+01 5.000000e+01 -1.924000e+00
    endloop
  endfacet
  facet normal -0.000000e+00 -0.000000e+00 -1.000000e+00
    outer loop
      vertex 5.000000e+01 5.000000e+01 -1.924000e+00
      vertex 1.557647e-01 6.824495e-01 -1.924000e+00
      vertex -5.231107e-02 6.980426e-01 -1.924000e+00
    endloop
  endfacet
  facet normal -0.000000e+00 -0.000000e+00 -1.000000e+00
    outer loop
      vertex 5.000000e+01 5.000000e+01 -1.924000e+00
      vertex 3.500000e-01 6.062178e-01 -1.924000e+00
      vertex 1.557647e-01 6.824495e-01 -1.924000e+00
    endloop
  endfacet
  facet normal -0.000000e+00 -0.000000e+00 -1.000000e+00
    outer loop
      vertex 5.131363e-01 4.761209e-01 -1.924000e+00
      vertex 3.500000e-01 6.062178e-01 -1.924000e+00
      vertex 5.000000e+01 5.000000e+01 -1.924000e+00
    endloop
  endfacet
  facet normal -0.000000e+00 -0.000000e+00 -1.000000e+00
    outer loop
      vertex 5.000000e+01 5.000000e+01 -1.924000e+00
      vertex 6.306782e-01 3.037186e-01 -1.924000e+00
      vertex 5.131363e-01 4.761209e-01 -1.924000e+00
    endloop
  endfacet
  facet normal -0.000000e+00 -0.000000e+00 -1.000000e+00
    outer loop
      vertex 5.000000e+01 5.000000e+01 -1.924000e+00
      vertex 6.921816e-01 1.043296e-01 -1.924000e+00
      vertex 6.306782e-01 3.037186e-01 -1.924000e+00
    endloop
  endfacet
  facet normal -0.000000e+00 -0.000000e+00 -1.000000e+00
    outer loop
      vertex 5.000000e+01 -5.000000e+01 -1.924000e+00
      vertex 6.921816e-01 1.043296e-01 -1.924000e+00
      vertex 5.000000e+01 5.000000e+01 -1.924000e+00
    endloop
  endfacet
  facet normal -0.000000e+00 -0.000000e+00 -1.000000e+00
    outer loop
      vertex 5.000000e+01 -5.000000e+01 -1.924000e+00
      vertex 6.921816e-01 -1.043296e-01 -1.924000e+00
      vertex 6.921816e-01 1.043296e-01 -1.924000e+00
    endloop
  endfacet
  facet normal -0.000000e+00 -0.000000e+00 -1.000000e+00
    outer loop
      vertex 5.000000e+01 -5.000000e+01 -1.924000e+00
      vertex 6.306782e-01 -3.037186e-01 -1.924000e+00
      vertex 6.921816e-01 -1.043296e-01 -1.924000e+00
    endloop
  endfacet
  facet normal -0.000000e+00 -0.000000e+00 -1.000000e+00
    outer loop
      vertex 5.131363e-01 -4.761209e-01 -1.924000e+00
      vertex 6.306782e-01 -3.037186e-01 -1.924000e+00
      vertex 5.000000e+01 -5.000000e+01 -1.924000e+00
    endloop
  endfacet
  facet normal -0.000000e+00 -0.000000e+00 -1.000000e+00
    outer loop
      vertex 5.000000e+01 -5.000000e+01 -1.924000e+00
      vertex 3.500000e-01 -6.062178e-01 -1.924000e+00
      vertex 5.131363e-01 -4.761209e-01 -1.924000e+00
    endloop
  endfacet
  facet normal -0.000000e+00 -0.000000e+00 -1.000000e+00
    outer loop
      vertex 5.000000e+01 -5.000000e+01 -1.924000e+00
      vertex 1.557647e-01 -6.824495e-01 -1.924000e+00
      vertex 3.500000e-01 -6.062178e-01 -1.924000e+00
    endloop
  endfacet
  facet normal -0.000000e+00 -0.000000e+00 -1.000000e+00
    outer loop
      vertex -5.231107e-02 -6.980426e-01 -1.924000e+00
      vertex 1.557647e-01 -6.824495e-01 -1.924000e+00
      vertex 5.000000e+01 -5.000000e+01 -1.924000e+00
    endloop
  endfacet
  facet normal -0.000000e+00 -0.000000e+00 -1.000000e+00
    outer loop
      vertex -5.000000e+01 -5.000000e+01 -1.924000e+00
      vertex -5.231107e-02 -6.980426e-01 -1.924000e+00
      vertex 5.000000e+01 -5.000000e+01 -1.924000e+00
    endloop
  endfacet
  facet normal -0.000000e+00 -0.000000e+00 -1.000000e+00
    outer loop
      vertex -2.557387e-01 -6.516116e-01 -1.924000e+00
      vertex -5.231107e-02 -6.980426e-01 -1.924000e+00
      vertex -5.000000e+01 -5.000000e+01 -1.924000e+00
    endloop
  endfacet
  facet normal -0.000000e+00 -0.000000e+00 -1.000000e+00
    outer loop
      vertex -5.000000e+01 -5.000000e+01 -1.924000e+00
      vertex -4.364429e-01 -5.472820e-01 -1.924000e+00
      vertex -2.557387e-01 -6.516116e-01 -1.924000e+00
    endloop
  endfacet
  facet normal -0.000000e+00 -0.000000e+00 -1.000000e+00
    outer loop
      vertex -5.000000e+01 -5.000000e+01 -1.924000e+00
      vertex -5.783671e-01 -3.943240e-01 -1.924000e+00
      vertex -4.364429e-01 -5.472820e-01 -1.924000e+00
    endloop
  endfacet
  facet normal -0.000000e+00 -0.000000e+00 -1.000000e+00
    outer loop
      vertex -6.689010e-01 -2.063286e-01 -1.924000e+00
      vertex -5.783671e-01 -3.943240e-01 -1.924000e+00
      vertex -5.000000e+01 -5.000000e+01 -1.924000e+00
    endloop
  endfacet
  facet normal -0.000000e+00 -0.000000e+00 -1.000000e+00
    outer loop
      vertex -6.689010e-01 2.063286e-01 -1.924000e+00
      vertex -5.000000e+01 5.000000e+01 -1.924000e+00
      vertex -5.783671e-01 3.943240e-01 -1.924000e+00
    endloop
  endfacet
  facet normal -0.000000e+00 -0.000000e+00 -1.000000e+00
    outer loop
      vertex -7.000000e-01 8.572527e-17 -1.924000e+00
      vertex -5.000000e+01 5.000000e+01 -1.924000e+00
      vertex -6.689010e-01 2.063286e-01 -1.924000e+00
    endloop
  endfacet
  facet normal -0.000000e+00 -0.000000e+00 -1.000000e+00
    outer loop
      vertex -7.000000e-01 8.572527e-17 -1.924000e+00
      vertex -5.000000e+01 -5.000000e+01 -1.924000e+00
      vertex -5.000000e+01 5.000000e+01 -1.924000e+00
    endloop
  endfacet
  facet normal -0.000000e+00 -0.000000e+00 -1.000000e+00
    outer loop
      vertex -6.689010e-01 -2.063286e-01 -1.924000e+00
      vertex -5.000000e+01 -5.000000e+01 -1.924000e+00
      vertex -7.000000e-01 8.572527e-17 -1.924000e+00
    endloop
  endfacet
  facet normal 0.000000e+00 1.000000e+00 0.000000e+00
    outer loop
      vertex 5.000000e+01 5.000000e+01 1.476000e+00
      vertex -5.000000e+01 5.000000e+01 1.476000e+00
      vertex -5.000000e+01 5.000000e+01 1.876000e+00
    endloop
  endfacet
  facet normal 0.000000e+00 1.000000e+00 0.000000e+00
    outer loop
      vertex 5.000000e+01 5.000000e+01 1.476000e+00
      vertex -5.000000e+01 5.000000e+01 1.876000e+00
      vertex 5.000000e+01 5.000000e+01 1.876000e+00
    endloop
  endfacet
  facet normal 1.000000e+00 0.000000e+00 0.000000e+00
    outer loop
      vertex 5.000000e+01 -5.000000e+01 1.476000e+00
      vertex 5.000000e+01 5.000000e+01 1.476000e+00
      vertex 5.000000e+01 5.000000e+01 1.876000e+00
    endloop
  endfacet
  facet normal 1.000000e+00 0.000000e+00 0.000000e+00
    outer loop
      vertex 5.000000e+01 -5.000000e+01 1.476000e+00
      vertex 5.000000e+01 5.000000e+01 1.876000e+00
      vertex 5.000000e+01 -5.000000e+01 1.876000e+00
    endloop
  endfacet
  facet normal 0.000000e+00 -1.000000e+00 0.000000e+00
    outer loop
      vertex -5.000000e+01 -5.000000e+01 1.476000e+00
      vertex 5.000000e+01 -5.000000e+01 1.476000e+00
      vertex 5.000000e+01 -5.000000e+01 1.876000e+00
    endloop
  endfacet
  facet normal 0.000000e+00 -1.000000e+00 0.000000e+00
    outer loop
      vertex -5.000000e+01 -5.000000e+01 1.476000e+00
      vertex 5.000000e+01 -5.000000e+01 1.876000e+00
      vertex -5.000000e+01 -5.000000e+01 1.876000e+00
    endloop
  endfacet
  facet normal -1.000000e+00 0.000000e+00 0.000000e+00
    outer loop
      vertex -5.000000e+01 5.000000e+01 1.476000e+00
      vertex -5.000000e+01 -5.000000e+01 1.476000e+00
      vertex -5.000000e+01 -5.000000e+01 1.876000e+00
    endloop
  endfacet
  facet normal -1.000000e+00 0.000000e+00 0.000000e+00
    outer loop
      vertex -5.000000e+01 5.000000e+01 1.476000e+00
      vertex -5.000000e+01 -5.000000e+01 1.876000e+00
      vertex -5.000000e+01 5.000000e+01 1.876000e+00
    endloop
  endfacet
  facet normal 1.000000e+00 0.000000e+00 0.000000e+00
    outer loop
      vertex -4.586602e+01 3.658509e+01 1.476000e+00
      vertex -4.586602e+01 4.277099e+01 1.476000e+00
      vertex -4.586602e+01 4.277099e+01 1.876000e+00
    endloop
  endfacet
  facet normal 1.000000e+00 0.000000e+00 0.000000e+00
    outer loop
      vertex -4.586602e+01 3.658509e+01 1.476000e+00
      vertex -4.586602e+01 4.277099e+01 1.876000e+00
      vertex -4.586602e+01 3.658509e+01 1.876000e+00
    endloop
  endfacet
  facet normal 0.000000e+00 1.000000e+00 0.000000e+00
    outer loop
      vertex -4.413398e+01 3.658509e+01 1.476000e+00
      vertex -4.586602e+01 3.658509e+01 1.476000e+00
      vertex -4.586602e+01 3.658509e+01 1.876000e+00
    endloop
  endfacet
  facet normal 0.000000e+00 1.000000e+00 0.000000e+00
    outer loop
      vertex -4.413398e+01 3.658509e+01 1.476000e+00
      vertex -4.586602e+01 3.658509e+01 1.876000e+00
      vertex -4.413398e+01 3.658509e+01 1.876000e+00
    endloop
  endfacet
  facet normal -1.000000e+00 -0.000000e+00 -0.000000e+00
    outer loop
      vertex -4.413398e+01 4.277099e+01 1.476000e+00
      vertex -4.413398e+01 3.658509e+01 1.476000e+00
      vertex -4.413398e+01 3.658509e+01 1.876000e+00
    endloop
  endfacet
  facet normal -1.000000e+00 -0.000000e+00 -0.000000e+00
    outer loop
      vertex -4.413398e+01 4.277099e+01 1.476000e+00
      vertex -4.413398e+01 3.658509e+01 1.876000e+00
      vertex -4.413398e+01 4.277099e+01 1.876000e+00
    endloop
  endfacet
  facet normal 0.000000e+00 -1.000000e+00 0.000000e+00
    outer loop
      vertex -4.586602e+01 4.277099e+01 1.476000e+00
      vertex -4.413398e+01 4.277099e+01 1.476000e+00
      vertex -4.413398e+01 4.277099e+01 1.876000e+00
    endloop
  endfacet
  facet normal 0.000000e+00 -1.000000e+00 0.000000e+00
    outer loop
      vertex -4.586602e+01 4.277099e+01 1.476000e+00
      vertex -4.413398e+01 4.277099e+01 1.876000e+00
      vertex -4.586602e+01 4.277099e+01 1.876000e+00
    endloop
  endfacet
  facet normal 1.000000e+00 0.000000e+00 0.000000e+00
    outer loop
      vertex 3.881202e+01 1.349108e+01 1.476000e+00
      vertex 3.881202e+01 1.967698e+01 1.476000e+00
      vertex 3.881202e+01 1.967698e+01 1.876000e+00
    endloop
  endfacet
  facet normal 1.000000e+00 0.000000e+00 0.000000e+00
    outer loop
      vertex 3.881202e+01 1.349108e+01 1.476000e+00
      vertex 3.881202e+01 1.967698e+01 1.876000e+00
      vertex 3.881202e+01 1.349108e+01 1.876000e+00
    endloop
  endfacet
  facet normal 0.000000e+00 1.000000e+00 0.000000e+00
    outer loop
      vertex 4.054406e+01 1.349108e+01 1.476000e+00
      vertex 3.881202e+01 1.349108e+01 1.476000e+00
      vertex 3.881202e+01 1.349108e+01 1.876000e+00
    endloop
  endfacet
  facet normal 0.000000e+00 1.000000e+00 0.000000e+00
    outer loop
      vertex 4.054406e+01 1.349108e+01 1.476000e+00
      vertex 3.881202e+01 1.349108e+01 1.876000e+00
      vertex 4.054406e+01 1.349108e+01 1.876000e+00
    endloop
  endfacet
  facet normal -1.000000e+00 -0.000000e+00 -0.000000e+00
    outer loop
      vertex 4.054406e+01 1.967698e+01 1.476000e+00
      vertex 4.054406e+01 1.349108e+01 1.476000e+00
      vertex 4.054406e+01 1.349108e+01 1.876000e+00
    endloop
  endfacet
  facet normal -1.000000e+00 -0.000000e+00 -0.000000e+00
    outer loop
      vertex 4.054406e+01 1.967698e+01 1.476000e+00
      vertex 4.054406e+01 1.349108e+01 1.876000e+00
      vertex 4.054406e+01 1.967698e+01 1.876000e+00
    endloop
  endfacet
  facet normal 0.000000e+00 -1.000000e+00 0.000000e+00
    outer loop
      vertex 3.881202e+01 1.967698e+01 1.476000e+00
      vertex 4.054406e+01 1.967698e+01 1.476000e+00
      vertex 4.054406e+01 1.967698e+01 1.876000e+00
    endloop
  endfacet
  facet normal 0.000000e+00 -1.000000e+00 0.000000e+00
    outer loop
      vertex 3.881202e+01 1.967698e+01 1.476000e+00
      vertex 4.054406e+01 1.967698e+01 1.876000e+00
      vertex 3.881202e+01 1.967698e+01 1.876000e+00
    endloop
  endfacet
  facet normal 1.000000e+00 0.000000e+00 0.000000e+00
    outer loop
      vertex 3.881202e+01 -1.730093e+01 1.476000e+00
      vertex 3.881202e+01 -1.111504e+01 1.476000e+00
      vertex 3.881202e+01 -1.111504e+01 1.876000e+00
    endloop
  endfacet
  facet normal 1.000000e+00 0.000000e+00 0.000000e+00
    outer loop
      vertex 3.881202e+01 -1.730093e+01 1.476000e+00
      vertex 3.881202e+01 -1.111504e+01 1.876000e+00
      vertex 3.881202e+01 -1.730093e+01 1.876000e+00
    endloop
  endfacet
  facet normal 0.000000e+00 1.000000e+00 0.000000e+00
    outer loop
      vertex 4.054406e+01 -1.730093e+01 1.476000e+00
      vertex 3.881202e+01 -1.730093e+01 1.476000e+00
      vertex 3.881202e+01 -1.730093e+01 1.876000e+00
    endloop
  endfacet
  facet normal 0.000000e+00 1.000000e+00 0.000000e+00
    outer loop
      vertex 4.054406e+01 -1.730093e+01 1.476000e+00
      vertex 3.881202e+01 -1.730093e+01 1.876000e+00
      vertex 4.054406e+01 -1.730093e+01 1.876000e+00
    endloop
  endfacet
  facet normal -1.000000e+00 -0.000000e+00 -0.000000e+00
    outer loop
      vertex 4.054406e+01 -1.111504e+01 1.476000e+00
      vertex 4.054406e+01 -1.730093e+01 1.476000e+00
      vertex 4.054406e+01 -1.730093e+01 1.876000e+00
    endloop
  endfacet
  facet normal -1.000000e+00 -0.000000e+00 -0.000000e+00
    outer loop
      vertex 4.054406e+01 -1.111504e+01 1.476000e+00
      vertex 4.054406e+01 -1.730093e+01 1.876000e+00
      vertex 4.054406e+01 -1.111504e+01 1.876000e+00
    endloop
  endfacet
  facet normal 0.000000e+00 -1.000000e+00 0.000000e+00
    outer loop
      vertex 3.881202e+01 -1.111504e+01 1.476000e+00
      vertex 4.054406e+01 -1.111504e+01 1.476000e+00
      vertex 4.054406e+01 -1.111504e+01 1.876000e+00
    endloop
  endfacet
  facet normal 0.000000e+00 -1.000000e+00 0.000000e+00
    outer loop
      vertex 3.881202e+01 -1.111504e+01 1.476000e+00
      vertex 4.054406e+01 -1.111504e+01 1.876000e+00
      vertex 3.881202e+01 -1.111504e+01 1.876000e+00
    endloop
  endfacet
  facet normal 1.000000e+00 0.000000e+00 0.000000e+00
    outer loop
      vertex 3.111401e+01 -2.499894e+01 1.476000e+00
      vertex 3.111401e+01 -1.881304e+01 1.476000e+00
      vertex 3.111401e+01 -1.881304e+01 1.876000e+00
    endloop
  endfacet
  facet normal 1.000000e+00 0.000000e+00 0.000000e+00
    outer loop
      vertex 3.111401e+01 -2.499894e+01 1.476000e+00
      vertex 3.111401e+01 -1.881304e+01 1.876000e+00
      vertex 3.111401e+01 -2.499894e+01 1.876000e+00
    endloop
  endfacet
  facet normal 0.000000e+00 1.000000e+00 0.000000e+00
    outer loop
      vertex 3.284606e+01 -2.499894e+01 1.476000e+00
      vertex 3.111401e+01 -2.499894e+01 1.476000e+00
      vertex 3.111401e+01 -2.499894e+01 1.876000e+00
    endloop
  endfacet
  facet normal 0.000000e+00 1.000000e+00 0.000000e+00
    outer loop
      vertex 3.284606e+01 -2.499894e+01 1.476000e+00
      vertex 3.111401e+01 -2.499894e+01 1.876000e+00
      vertex 3.284606e+01 -2.499894e+01 1.876000e+00
    endloop
  endfacet
  facet normal -1.000000e+00 -0.000000e+00 -0.000000e+00
    outer loop
      vertex 3.284606e+01 -1.881304e+01 1.476000e+00
      vertex 3.284606e+01 -2.499894e+01 1.476000e+00
      vertex 3.284606e+01 -2.499894e+01 1.876000e+00
    endloop
  endfacet
  facet normal -1.000000e+00 -0.000000e+00 -0.000000e+00
    outer loop
      vertex 3.284606e+01 -1.881304e+01 1.476000e+00
      vertex 3.284606e+01 -2.499894e+01 1.876000e+00
      vertex 3.284606e+01 -1.881304e+01 1.876000e+00
    endloop
  endfacet
  facet normal 0.000000e+00 -1.000000e+00 0.000000e+00
    outer loop
      vertex 3.111401e+01 -1.881304e+01 1.476000e+00
      vertex 3.284606e+01 -1.881304e+01 1.476000e+00
      vertex 3.284606e+01 -1.881304e+01 1.876000e+00
    endloop
  endfacet
  facet normal 0.000000e+00 -1.000000e+00 0.000000e+00
    outer loop
      vertex 3.111401e+01 -1.881304e+01 1.476000e+00
      vertex 3.284606e+01 -1.881304e+01 1.876000e+00
      vertex 3.111401e+01 -1.881304e+01 1.876000e+00
    endloop
  endfacet
  facet normal 1.000000e+00 0.000000e+00 0.000000e+00
    outer loop
      vertex 2.341601e+01 5.793077e+00 1.476000e+00
      vertex 2.341601e+01 1.197897e+01 1.476000e+00
      vertex 2.341601e+01 1.197897e+01 1.876000e+00
    endloop
  endfacet
  facet normal 1.000000e+00 0.000000e+00 0.000000e+00
    outer loop
      vertex 2.341601e+01 5.793077e+00 1.476000e+00
      vertex 2.341601e+01 1.197897e+01 1.876000e+00
      vertex 2.341601e+01 5.793077e+00 1.876000e+00
    endloop
  endfacet
  facet normal 0.000000e+00 1.000000e+00 0.000000e+00
    outer loop
      vertex 2.514806e+01 5.793077e+00 1.476000e+00
      vertex 2.341601e+01 5.793077e+00 1.476000e+00
      vertex 2.341601e+01 5.793077e+00 1.876000e+00
    endloop
  endfacet
  facet normal 0.000000e+00 1.000000e+00 0.000000e+00
    outer loop
      vertex 2.514806e+01 5.793077e+00 1.476000e+00
      vertex 2.341601e+01 5.793077e+00 1.876000e+00
      vertex 2.514806e+01 5.793077e+00 1.876000e+00
    endloop
  endfacet
  facet normal -1.000000e+00 -0.000000e+00 -0.000000e+00
    outer loop
      vertex 2.514806e+01 1.197897e+01 1.476000e+00
      vertex 2.514806e+01 5.793077e+00 1.476000e+00
      vertex 2.514806e+01 5.793077e+00 1.876000e+00
    endloop
  endfacet
  facet normal -1.000000e+00 -0.000000e+00 -0.000000e+00
    outer loop
      vertex 2.514806e+01 1.197897e+01 1.476000e+00
      vertex 2.514806e+01 5.793077e+00 1.876000e+00
      vertex 2.514806e+01 1.197897e+01 1.876000e+00
    endloop
  endfacet
  facet normal 0.000000e+00 -1.000000e+00 0.000000e+00
    outer loop
      vertex 2.341601e+01 1.197897e+01 1.476000e+00
      vertex 2.514806e+01 1.197897e+01 1.476000e+00
      vertex 2.514806e+01 1.197897e+01 1.876000e+00
    endloop
  endfacet
  facet normal 0.000000e+00 -1.000000e+00 0.000000e+00
    outer loop
      vertex 2.341601e+01 1.197897e+01 1.476000e+00
      vertex 2.514806e+01 1.197897e+01 1.876000e+00
      vertex 2.341601e+01 1.197897e+01 1.876000e+00
    endloop
  endfacet
  facet normal 1.000000e+00 0.000000e+00 0.000000e+00
    outer loop
      vertex 1.571800e+01 3.658509e+01 1.476000e+00
      vertex 1.571800e+01 4.277099e+01 1.476000e+00
      vertex 1.571800e+01 4.277099e+01 1.876000e+00
    endloop
  endfacet
  facet normal 1.000000e+00 0.000000e+00 0.000000e+00
    outer loop
      vertex 1.571800e+01 3.658509e+01 1.476000e+00
      vertex 1.571800e+01 4.277099e+01 1.876000e+00
      vertex 1.571800e+01 3.658509e+01 1.876000e+00
    endloop
  endfacet
  facet normal 0.000000e+00 1.000000e+00 0.000000e+00
    outer loop
      vertex 1.745005e+01 3.658509e+01 1.476000e+00
      vertex 1.571800e+01 3.658509e+01 1.476000e+00
      vertex 1.571800e+01 3.658509e+01 1.876000e+00
    endloop
  endfacet
  facet normal 0.000000e+00 1.000000e+00 0.000000e+00
    outer loop
      vertex 1.745005e+01 3.658509e+01 1.476000e+00
      vertex 1.571800e+01 3.658509e+01 1.876000e+00
      vertex 1.745005e+01 3.658509e+01 1.876000e+00
    endloop
  endfacet
  facet normal -1.000000e+00 -0.000000e+00 -0.000000e+00
    outer loop
      vertex 1.745005e+01 4.277099e+01 1.476000e+00
      vertex 1.745005e+01 3.658509e+01 1.476000e+00
      vertex 1.745005e+01 3.658509e+01 1.876000e+00
    endloop
  endfacet
  facet normal -1.000000e+00 -0.000000e+00 -0.000000e+00
    outer loop
      vertex 1.745005e+01 4.277099e+01 1.476000e+00
      vertex 1.745005e+01 3.658509e+01 1.876000e+00
      vertex 1.745005e+01 4.277099e+01 1.876000e+00
    endloop
  endfacet
  facet normal 0.000000e+00 -1.000000e+00 0.000000e+00
    outer loop
      vertex 1.571800e+01 4.277099e+01 1.476000e+00
      vertex 1.745005e+01 4.277099e+01 1.476000e+00
      vertex 1.745005e+01 4.277099e+01 1.876000e+00
    endloop
  endfacet
  facet normal 0.000000e+00 -1.000000e+00 0.000000e+00
    outer loop
      vertex 1.571800e+01 4.277099e+01 1.476000e+00
      vertex 1.745005e+01 4.277099e+01 1.876000e+00
      vertex 1.571800e+01 4.277099e+01 1.876000e+00
    endloop
  endfacet
  facet normal 1.000000e+00 0.000000e+00 0.000000e+00
    outer loop
      vertex 1.571800e+01 -2.499894e+01 1.476000e+00
      vertex 1.571800e+01 -1.881304e+01 1.476000e+00
      vertex 1.571800e+01 -1.881304e+01 1.876000e+00
    endloop
  endfacet
  facet normal 1.000000e+00 0.000000e+00 0.000000e+00
    outer loop
      vertex 1.571800e+01 -2.499894e+01 1.476000e+00
      vertex 1.571800e+01 -1.881304e+01 1.876000e+00
      vertex 1.571800e+01 -2.499894e+01 1.876000e+00
    endloop
  endfacet
  facet normal 0.000000e+00 1.000000e+00 0.000000e+00
    outer loop
      vertex 1.745005e+01 -2.499894e+01 1.476000e+00
      vertex 1.571800e+01 -2.499894e+01 1.476000e+00
      vertex 1.571800e+01 -2.499894e+01 1.876000e+00
    endloop
  endfacet
  facet normal 0.000000e+00 1.000000e+00 0.000000e+00
    outer loop
      vertex 1.745005e+01 -2.499894e+01 1.476000e+00
      vertex 1.571800e+01 -2.499894e+01 1.876000e+00
      vertex 1.745005e+01 -2.499894e+01 1.876000e+00
    endloop
  endfacet
  facet normal -1.000000e+00 -0.000000e+00 -0.000000e+00
    outer loop
      vertex 1.745005e+01 -1.881304e+01 1.476000e+00
      vertex 1.745005e+01 -2.499894e+01 1.476000e+00
      vertex 1.745005e+01 -2.499894e+01 1.876000e+00
    endloop
  endfacet
  facet normal -1.000000e+00 -0.000000e+00 -0.000000e+00
    outer loop
      vertex 1.745005e+01 -1.881304e+01 1.476000e+00
      vertex 1.745005e+01 -2.499894e+01 1.876000e+00
      vertex 1.745005e+01 -1.881304e+01 1.876000e+00
    endloop
  endfacet
  facet normal 0.000000e+00 -1.000000e+00 0.000000e+00
    outer loop
      vertex 1.571800e+01 -1.881304e+01 1.476000e+00
      vertex 1.745005e+01 -1.881304e+01 1.476000e+00
      vertex 1.745005e+01 -1.881304e+01 1.876000e+00
    endloop
  endfacet
  facet normal 0.000000e+00 -1.000000e+00 0.000000e+00
    outer loop
      vertex 1.571800e+01 -1.881304e+01 1.476000e+00
      vertex 1.745005e+01 -1.881304e+01 1.876000e+00
      vertex 1.571800e+01 -1.881304e+01 1.876000e+00
    endloop
  endfacet
  facet normal 1.000000e+00 0.000000e+00 0.000000e+00
    outer loop
      vertex 8.020000e+00 -1.904926e+00 1.476000e+00
      vertex 8.020000e+00 4.280970e+00 1.476000e+00
      vertex 8.020000e+00 4.280970e+00 1.876000e+00
    endloop
  endfacet
  facet normal 1.000000e+00 0.000000e+00 0.000000e+00
    outer loop
      vertex 8.020000e+00 -1.904926e+00 1.476000e+00
      vertex 8.020000e+00 4.280970e+00 1.876000e+00
      vertex 8.020000e+00 -1.904926e+00 1.876000e+00
    endloop
  endfacet
  facet normal 0.000000e+00 1.000000e+00 0.000000e+00
    outer loop
      vertex 9.752050e+00 -1.904926e+00 1.476000e+00
      vertex 8.020000e+00 -1.904926e+00 1.476000e+00
      vertex 8.020000e+00 -1.904926e+00 1.876000e+00
    endloop
  endfacet
  facet normal 0.000000e+00 1.000000e+00 0.000000e+00
    outer loop
      vertex 9.752050e+00 -1.904926e+00 1.476000e+00
      vertex 8.020000e+00 -1.904926e+00 1.876000e+00
      vertex 9.752050e+00 -1.904926e+00 1.876000e+00
    endloop
  endfacet
  facet normal -1.000000e+00 -0.000000e+00 -0.000000e+00
    outer loop
      vertex 9.752050e+00 4.280970e+00 1.476000e+00
      vertex 9.752050e+00 -1.904926e+00 1.476000e+00
      vertex 9.752050e+00 -1.904926e+00 1.876000e+00
    endloop
  endfacet
  facet normal -1.000000e+00 -0.000000e+00 -0.000000e+00
    outer loop
      vertex 9.752050e+00 4.280970e+00 1.476000e+00
      vertex 9.752050e+00 -1.904926e+00 1.876000e+00
      vertex 9.752050e+00 4.280970e+00 1.876000e+00
    endloop
  endfacet
  facet normal 0.000000e+00 -1.000000e+00 0.000000e+00
    outer loop
      vertex 8.020000e+00 4.280970e+00 1.476000e+00
      vertex 9.752050e+00 4.280970e+00 1.476000e+00
      vertex 9.752050e+00 4.280970e+00 1.876000e+00
    endloop
  endfacet
  facet normal 0.000000e+00 -1.000000e+00 0.000000e+00
    outer loop
      vertex 8.020000e+00 4.280970e+00 1.476000e+00
      vertex 9.752050e+00 4.280970e+00 1.876000e+00
      vertex 8.020000e+00 4.280970e+00 1.876000e+00
    endloop
  endfacet
  facet normal 1.000000e+00 0.000000e+00 0.000000e+00
    outer loop
      vertex -4.586602e+01 -9.602930e+00 1.476000e+00
      vertex -4.586602e+01 -3.417034e+00 1.476000e+00
      vertex -4.586602e+01 -3.417034e+00 1.876000e+00
    endloop
  endfacet
  facet normal 1.000000e+00 0.000000e+00 0.000000e+00
    outer loop
      vertex -4.586602e+01 -9.602930e+00 1.476000e+00
      vertex -4.586602e+01 -3.417034e+00 1.876000e+00
      vertex -4.586602e+01 -9.602930e+00 1.876000e+00
    endloop
  endfacet
  facet normal 0.000000e+00 1.000000e+00 0.000000e+00
    outer loop
      vertex -4.413398e+01 -9.602930e+00 1.476000e+00
      vertex -4.586602e+01 -9.602930e+00 1.476000e+00
      vertex -4.586602e+01 -9.602930e+00 1.876000e+00
    endloop
  endfacet
  facet normal 0.000000e+00 1.000000e+00 0.000000e+00
    outer loop
      vertex -4.413398e+01 -9.602930e+00 1.476000e+00
      vertex -4.586602e+01 -9.602930e+00 1.876000e+00
      vertex -4.413398e+01 -9.602930e+00 1.876000e+00
    endloop
  endfacet
  facet normal -1.000000e+00 -0.000000e+00 -0.000000e+00
    outer loop
      vertex -4.413398e+01 -3.417034e+00 1.476000e+00
      vertex -4.413398e+01 -9.602930e+00 1.476000e+00
      vertex -4.413398e+01 -9.602930e+00 1.876000e+00
    endloop
  endfacet
  facet normal -1.000000e+00 -0.000000e+00 -0.000000e+00
    outer loop
      vertex -4.413398e+01 -3.417034e+00 1.476000e+00
      vertex -4.413398e+01 -9.602930e+00 1.876000e+00
      vertex -4.413398e+01 -3.417034e+00 1.876000e+00
    endloop
  endfacet
  facet normal 0.000000e+00 -1.000000e+00 0.000000e+00
    outer loop
      vertex -4.586602e+01 -3.417034e+00 1.476000e+00
      vertex -4.413398e+01 -3.417034e+00 1.476000e+00
      vertex -4.413398e+01 -3.417034e+00 1.876000e+00
    endloop
  endfacet
  facet normal 0.000000e+00 -1.000000e+00 0.000000e+00
    outer loop
      vertex -4.586602e+01 -3.417034e+00 1.476000e+00
      vertex -4.413398e+01 -3.417034e+00 1.876000e+00
      vertex -4.586602e+01 -3.417034e+00 1.876000e+00
    endloop
  endfacet
  facet normal 1.000000e+00 0.000000e+00 0.000000e+00
    outer loop
      vertex 3.219961e-01 -9.602930e+00 1.476000e+00
      vertex 3.219961e-01 -3.417034e+00 1.476000e+00
      vertex 3.219961e-01 -3.417034e+00 1.876000e+00
    endloop
  endfacet
  facet normal 1.000000e+00 0.000000e+00 0.000000e+00
    outer loop
      vertex 3.219961e-01 -9.602930e+00 1.476000e+00
      vertex 3.219961e-01 -3.417034e+00 1.876000e+00
      vertex 3.219961e-01 -9.602930e+00 1.876000e+00
    endloop
  endfacet
  facet normal 0.000000e+00 1.000000e+00 0.000000e+00
    outer loop
      vertex 2.054047e+00 -9.602930e+00 1.476000e+00
      vertex 3.219961e-01 -9.602930e+00 1.476000e+00
      vertex 3.219961e-01 -9.602930e+00 1.876000e+00
    endloop
  endfacet
  facet normal 0.000000e+00 1.000000e+00 0.000000e+00
    outer loop
      vertex 2.054047e+00 -9.602930e+00 1.476000e+00
      vertex 3.219961e-01 -9.602930e+00 1.876000e+00
      vertex 2.054047e+00 -9.602930e+00 1.876000e+00
    endloop
  endfacet
  facet normal -1.000000e+00 -0.000000e+00 -0.000000e+00
    outer loop
      vertex 2.054047e+00 -3.417034e+00 1.476000e+00
      vertex 2.054047e+00 -9.602930e+00 1.476000e+00
      vertex 2.054047e+00 -9.602930e+00 1.876000e+00
    endloop
  endfacet
  facet normal -1.000000e+00 -0.000000e+00 -0.000000e+00
    outer loop
      vertex 2.054047e+00 -3.417034e+00 1.476000e+00
      vertex 2.054047e+00 -9.602930e+00 1.876000e+00
      vertex 2.054047e+00 -3.417034e+00 1.876000e+00
    endloop
  endfacet
  facet normal 0.000000e+00 -1.000000e+00 0.000000e+00
    outer loop
      vertex 3.219961e-01 -3.417034e+00 1.476000e+00
      vertex 2.054047e+00 -3.417034e+00 1.476000e+00
      vertex 2.054047e+00 -3.417034e+00 1.876000e+00
    endloop
  endfacet
  facet normal 0.000000e+00 -1.000000e+00 0.000000e+00
    outer loop
      vertex 3.219961e-01 -3.417034e+00 1.476000e+00
      vertex 2.054047e+00 -3.417034e+00 1.876000e+00
      vertex 3.219961e-01 -3.417034e+00 1.876000e+00
    endloop
  endfacet
  facet normal 1.000000e+00 0.000000e+00 0.000000e+00
    outer loop
      vertex -7.376008e+00 1.349108e+01 1.476000e+00
      vertex -7.376008e+00 1.967698e+01 1.476000e+00
      vertex -7.376008e+00 1.967698e+01 1.876000e+00
    endloop
  endfacet
  facet normal 1.000000e+00 0.000000e+00 0.000000e+00
    outer loop
      vertex -7.376008e+00 1.349108e+01 1.476000e+00
      vertex -7.376008e+00 1.967698e+01 1.876000e+00
      vertex -7.376008e+00 1.349108e+01 1.876000e+00
    endloop
  endfacet
  facet normal 0.000000e+00 1.000000e+00 0.000000e+00
    outer loop
      vertex -5.643957e+00 1.349108e+01 1.476000e+00
      vertex -7.376008e+00 1.349108e+01 1.476000e+00
      vertex -7.376008e+00 1.349108e+01 1.876000e+00
    endloop
  endfacet
  facet normal 0.000000e+00 1.000000e+00 0.000000e+00
    outer loop
      vertex -5.643957e+00 1.349108e+01 1.476000e+00
      vertex -7.376008e+00 1.349108e+01 1.876000e+00
      vertex -5.643957e+00 1.349108e+01 1.876000e+00
    endloop
  endfacet
  facet normal -1.000000e+00 -0.000000e+00 -0.000000e+00
    outer loop
      vertex -5.643957e+00 1.967698e+01 1.476000e+00
      vertex -5.643957e+00 1.349108e+01 1.476000e+00
      vertex -5.643957e+00 1.349108e+01 1.876000e+00
    endloop
  endfacet
  facet normal -1.000000e+00 -0.000000e+00 -0.000000e+00
    outer loop
      vertex -5.643957e+00 1.967698e+01 1.476000e+00
      vertex -5.643957e+00 1.349108e+01 1.876000e+00
      vertex -5.643957e+00 1.967698e+01 1.876000e+00
    endloop
  endfacet
  facet normal 0.000000e+00 -1.000000e+00 0.000000e+00
    outer loop
      vertex -7.376008e+00 1.967698e+01 1.476000e+00
      vertex -5.643957e+00 1.967698e+01 1.476000e+00
      vertex -5.643957e+00 1.967698e+01 1.876000e+00
    endloop
  endfacet
  facet normal 0.000000e+00 -1.000000e+00 0.000000e+00
    outer loop
      vertex -7.376008e+00 1.967698e+01 1.476000e+00
      vertex -5.643957e+00 1.967698e+01 1.876000e+00
      vertex -7.376008e+00 1.967698e+01 1.876000e+00
    endloop
  endfacet
  facet normal 1.000000e+00 0.000000e+00 0.000000e+00
    outer loop
      vertex -7.376008e+00 -4.809295e+01 1.476000e+00
      vertex -7.376008e+00 -4.190705e+01 1.476000e+00
      vertex -7.376008e+00 -4.190705e+01 1.876000e+00
    endloop
  endfacet
  facet normal 1.000000e+00 0.000000e+00 0.000000e+00
    outer loop
      vertex -7.376008e+00 -4.809295e+01 1.476000e+00
      vertex -7.376008e+00 -4.190705e+01 1.876000e+00
      vertex -7.376008e+00 -4.809295e+01 1.876000e+00
    endloop
  endfacet
  facet normal 0.000000e+00 1.000000e+00 0.000000e+00
    outer loop
      vertex -5.643957e+00 -4.809295e+01 1.476000e+00
      vertex -7.376008e+00 -4.809295e+01 1.476000e+00
      vertex -7.376008e+00 -4.809295e+01 1.876000e+00
    endloop
  endfacet
  facet normal 0.000000e+00 1.000000e+00 0.000000e+00
    outer loop
      vertex -5.643957e+00 -4.809295e+01 1.476000e+00
      vertex -7.376008e+00 -4.809295e+01 1.876000e+00
      vertex -5.643957e+00 -4.809295e+01 1.876000e+00
    endloop
  endfacet
  facet normal -1.000000e+00 -0.000000e+00 -0.000000e+00
    outer loop
      vertex -5.643957e+00 -4.190705e+01 1.476000e+00
      vertex -5.643957e+00 -4.809295e+01 1.476000e+00
      vertex -5.643957e+00 -4.809295e+01 1.876000e+00
    endloop
  endfacet
  facet normal -1.000000e+00 -0.000000e+00 -0.000000e+00
    outer loop
      vertex -5.643957e+00 -4.190705e+01 1.476000e+00
      vertex -5.643957e+00 -4.809295e+01 1.876000e+00
      vertex -5.643957e+00 -4.190705e+01 1.876000e+00
    endloop
  endfacet
  facet normal 0.000000e+00 -1.000000e+00 0.000000e+00
    outer loop
      vertex -7.376008e+00 -4.190705e+01 1.476000e+00
      vertex -5.643957e+00 -4.190705e+01 1.476000e+00
      vertex -5.643957e+00 -4.190705e+01 1.876000e+00
    endloop
  endfacet
  facet normal 0.000000e+00 -1.000000e+00 0.000000e+00
    outer loop
      vertex -7.376008e+00 -4.190705e+01 1.476000e+00
      vertex -5.643957e+00 -4.190705e+01 1.876000e+00
      vertex -7.376008e+00 -4.190705e+01 1.876000e+00
    endloop
  endfacet
  facet normal 1.000000e+00 0.000000e+00 0.000000e+00
    outer loop
      vertex -1.507401e+01 -9.602930e+00 1.476000e+00
      vertex -1.507401e+01 -3.417034e+00 1.476000e+00
      vertex -1.507401e+01 -3.417034e+00 1.876000e+00
    endloop
  endfacet
  facet normal 1.000000e+00 0.000000e+00 0.000000e+00
    outer loop
      vertex -1.507401e+01 -9.602930e+00 1.476000e+00
      vertex -1.507401e+01 -3.417034e+00 1.876000e+00
      vertex -1.507401e+01 -9.602930e+00 1.876000e+00
    endloop
  endfacet
  facet normal 0.000000e+00 1.000000e+00 0.000000e+00
    outer loop
      vertex -1.334196e+01 -9.602930e+00 1.476000e+00
      vertex -1.507401e+01 -9.602930e+00 1.476000e+00
      vertex -1.507401e+01 -9.602930e+00 1.876000e+00
    endloop
  endfacet
  facet normal 0.000000e+00 1.000000e+00 0.000000e+00
    outer loop
      vertex -1.334196e+01 -9.602930e+00 1.476000e+00
      vertex -1.507401e+01 -9.602930e+00 1.876000e+00
      vertex -1.334196e+01 -9.602930e+00 1.876000e+00
    endloop
  endfacet
  facet normal -1.000000e+00 -0.000000e+00 -0.000000e+00
    outer loop
      vertex -1.334196e+01 -3.417034e+00 1.476000e+00
      vertex -1.334196e+01 -9.602930e+00 1.476000e+00
      vertex -1.334196e+01 -9.602930e+00 1.876000e+00
    endloop
  endfacet
  facet normal -1.000000e+00 -0.000000e+00 -0.000000e+00
    outer loop
      vertex -1.334196e+01 -3.417034e+00 1.476000e+00
      vertex -1.334196e+01 -9.602930e+00 1.876000e+00
      vertex -1.334196e+01 -3.417034e+00 1.876000e+00
    endloop
  endfacet
  facet normal 0.000000e+00 -1.000000e+00 0.000000e+00
    outer loop
      vertex -1.507401e+01 -3.417034e+00 1.476000e+00
      vertex -1.334196e+01 -3.417034e+00 1.476000e+00
      vertex -1.334196e+01 -3.417034e+00 1.876000e+00
    endloop
  endfacet
  facet normal 0.000000e+00 -1.000000e+00 0.000000e+00
    outer loop
      vertex -1.507401e+01 -3.417034e+00 1.476000e+00
      vertex -1.334196e+01 -3.417034e+00 1.876000e+00
      vertex -1.507401e+01 -3.417034e+00 1.876000e+00
    endloop
  endfacet
  facet normal 1.000000e+00 0.000000e+00 0.000000e+00
    outer loop
      vertex -2.277201e+01 2.118908e+01 1.476000e+00
      vertex -2.277201e+01 2.737498e+01 1.476000e+00
      vertex -2.277201e+01 2.737498e+01 1.876000e+00
    endloop
  endfacet
  facet normal 1.000000e+00 0.000000e+00 0.000000e+00
    outer loop
      vertex -2.277201e+01 2.118908e+01 1.476000e+00
      vertex -2.277201e+01 2.737498e+01 1.876000e+00
      vertex -2.277201e+01 2.118908e+01 1.876000e+00
    endloop
  endfacet
  facet normal 0.000000e+00 1.000000e+00 0.000000e+00
    outer loop
      vertex -2.103996e+01 2.118908e+01 1.476000e+00
      vertex -2.277201e+01 2.118908e+01 1.476000e+00
      vertex -2.277201e+01 2.118908e+01 1.876000e+00
    endloop
  endfacet
  facet normal 0.000000e+00 1.000000e+00 0.000000e+00
    outer loop
      vertex -2.103996e+01 2.118908e+01 1.476000e+00
      vertex -2.277201e+01 2.118908e+01 1.876000e+00
      vertex -2.103996e+01 2.118908e+01 1.876000e+00
    endloop
  endfacet
  facet normal -1.000000e+00 -0.000000e+00 -0.000000e+00
    outer loop
      vertex -2.103996e+01 2.737498e+01 1.476000e+00
      vertex -2.103996e+01 2.118908e+01 1.476000e+00
      vertex -2.103996e+01 2.118908e+01 1.876000e+00
    endloop
  endfacet
  facet normal -1.000000e+00 -0.000000e+00 -0.000000e+00
    outer loop
      vertex -2.103996e+01 2.737498e+01 1.476000e+00
      vertex -2.103996e+01 2.118908e+01 1.876000e+00
      vertex -2.103996e+01 2.737498e+01 1.876000e+00
    endloop
  endfacet
  facet normal 0.000000e+00 -1.000000e+00 0.000000e+00
    outer loop
      vertex -2.277201e+01 2.737498e+01 1.476000e+00
      vertex -2.103996e+01 2.737498e+01 1.476000e+00
      vertex -2.103996e+01 2.737498e+01 1.876000e+00
    endloop
  endfacet
  facet normal 0.000000e+00 -1.000000e+00 0.000000e+00
    outer loop
      vertex -2.277201e+01 2.737498e+01 1.476000e+00
      vertex -2.103996e+01 2.737498e+01 1.876000e+00
      vertex -2.277201e+01 2.737498e+01 1.876000e+00
    endloop
  endfacet
  facet normal 1.000000e+00 0.000000e+00 0.000000e+00
    outer loop
      vertex -3.047002e+01 3.658509e+01 1.476000e+00
      vertex -3.047002e+01 4.277099e+01 1.476000e+00
      vertex -3.047002e+01 4.277099e+01 1.876000e+00
    endloop
  endfacet
  facet normal 1.000000e+00 0.000000e+00 0.000000e+00
    outer loop
      vertex -3.047002e+01 3.658509e+01 1.476000e+00
      vertex -3.047002e+01 4.277099e+01 1.876000e+00
      vertex -3.047002e+01 3.658509e+01 1.876000e+00
    endloop
  endfacet
  facet normal 0.000000e+00 1.000000e+00 0.000000e+00
    outer loop
      vertex -2.873797e+01 3.658509e+01 1.476000e+00
      vertex -3.047002e+01 3.658509e+01 1.476000e+00
      vertex -3.047002e+01 3.658509e+01 1.876000e+00
    endloop
  endfacet
  facet normal 0.000000e+00 1.000000e+00 0.000000e+00
    outer loop
      vertex -2.873797e+01 3.658509e+01 1.476000e+00
      vertex -3.047002e+01 3.658509e+01 1.876000e+00
      vertex -2.873797e+01 3.658509e+01 1.876000e+00
    endloop
  endfacet
  facet normal -1.000000e+00 -0.000000e+00 -0.000000e+00
    outer loop
      vertex -2.873797e+01 4.277099e+01 1.476000e+00
      vertex -2.873797e+01 3.658509e+01 1.476000e+00
      vertex -2.873797e+01 3.658509e+01 1.876000e+00
    endloop
  endfacet
  facet normal -1.000000e+00 -0.000000e+00 -0.000000e+00
    outer loop
      vertex -2.873797e+01 4.277099e+01 1.476000e+00
      vertex -2.873797e+01 3.658509e+01 1.876000e+00
      vertex -2.873797e+01 4.277099e+01 1.876000e+00
    endloop
  endfacet
  facet normal 0.000000e+00 -1.000000e+00 0.000000e+00
    outer loop
      vertex -3.047002e+01 4.277099e+01 1.476000e+00
      vertex -2.873797e+01 4.277099e+01 1.476000e+00
      vertex -2.873797e+01 4.277099e+01 1.876000e+00
    endloop
  endfacet
  facet normal 0.000000e+00 -1.000000e+00 0.000000e+00
    outer loop
      vertex -3.047002e+01 4.277099e+01 1.476000e+00
      vertex -2.873797e+01 4.277099e+01 1.876000e+00
      vertex -3.047002e+01 4.277099e+01 1.876000e+00
    endloop
  endfacet
  facet normal 1.000000e+00 0.000000e+00 0.000000e+00
    outer loop
      vertex -3.047002e+01 -9.602930e+00 1.476000e+00
      vertex -3.047002e+01 -3.417034e+00 1.476000e+00
      vertex -3.047002e+01 -3.417034e+00 1.876000e+00
    endloop
  endfacet
  facet normal 1.000000e+00 0.000000e+00 0.000000e+00
    outer loop
      vertex -3.047002e+01 -9.602930e+00 1.476000e+00
      vertex -3.047002e+01 -3.417034e+00 1.876000e+00
      vertex -3.047002e+01 -9.602930e+00 1.876000e+00
    endloop
  endfacet
  facet normal 0.000000e+00 1.000000e+00 0.000000e+00
    outer loop
      vertex -2.873797e+01 -9.602930e+00 1.476000e+00
      vertex -3.047002e+01 -9.602930e+00 1.476000e+00
      vertex -3.047002e+01 -9.602930e+00 1.876000e+00
    endloop
  endfacet
  facet normal 0.000000e+00 1.000000e+00 0.000000e+00
    outer loop
      vertex -2.873797e+01 -9.602930e+00 1.476000e+00
      vertex -3.047002e+01 -9.602930e+00 1.876000e+00
      vertex -2.873797e+01 -9.602930e+00 1.876000e+00
    endloop
  endfacet
  facet normal -1.000000e+00 -0.000000e+00 -0.000000e+00
    outer loop
      vertex -2.873797e+01 -3.417034e+00 1.476000e+00
      vertex -2.873797e+01 -9.602930e+00 1.476000e+00
      vertex -2.873797e+01 -9.602930e+00 1.876000e+00
    endloop
  endfacet
  facet normal -1.000000e+00 -0.000000e+00 -0.000000e+00
    outer loop
      vertex -2.873797e+01 -3.417034e+00 1.476000e+00
      vertex -2.873797e+01 -9.602930e+00 1.876000e+00
      vertex -2.873797e+01 -3.417034e+00 1.876000e+00
    endloop
  endfacet
  facet normal 0.000000e+00 -1.000000e+00 0.000000e+00
    outer loop
      vertex -3.047002e+01 -3.417034e+00 1.476000e+00
      vertex -2.873797e+01 -3.417034e+00 1.476000e+00
      vertex -2.873797e+01 -3.417034e+00 1.876000e+00
    endloop
  endfacet
  facet normal 0.000000e+00 -1.000000e+00 0.000000e+00
    outer loop
      vertex -3.047002e+01 -3.417034e+00 1.476000e+00
      vertex -2.873797e+01 -3.417034e+00 1.876000e+00
      vertex -3.047002e+01 -3.417034e+00 1.876000e+00
    endloop
  endfacet
  facet normal 1.000000e+00 0.000000e+00 0.000000e+00
    outer loop
      vertex -3.816802e+01 -3.269694e+01 1.476000e+00
      vertex -3.816802e+01 -2.651105e+01 1.476000e+00
      vertex -3.816802e+01 -2.651105e+01 1.876000e+00
    endloop
  endfacet
  facet normal 1.000000e+00 0.000000e+00 0.000000e+00
    outer loop
      vertex -3.816802e+01 -3.269694e+01 1.476000e+00
      vertex -3.816802e+01 -2.651105e+01 1.876000e+00
      vertex -3.816802e+01 -3.269694e+01 1.876000e+00
    endloop
  endfacet
  facet normal 0.000000e+00 1.000000e+00 0.000000e+00
    outer loop
      vertex -3.643597e+01 -3.269694e+01 1.476000e+00
      vertex -3.816802e+01 -3.269694e+01 1.476000e+00
      vertex -3.816802e+01 -3.269694e+01 1.876000e+00
    endloop
  endfacet
  facet normal 0.000000e+00 1.000000e+00 0.000000e+00
    outer loop
      vertex -3.643597e+01 -3.269694e+01 1.476000e+00
      vertex -3.816802e+01 -3.269694e+01 1.876000e+00
      vertex -3.643597e+01 -3.269694e+01 1.876000e+00
    endloop
  endfacet
  facet normal -1.000000e+00 -0.000000e+00 -0.000000e+00
    outer loop
      vertex -3.643597e+01 -2.651105e+01 1.476000e+00
      vertex -3.643597e+01 -3.269694e+01 1.476000e+00
      vertex -3.643597e+01 -3.269694e+01 1.876000e+00
    endloop
  endfacet
  facet normal -1.000000e+00 -0.000000e+00 -0.000000e+00
    outer loop
      vertex -3.643597e+01 -2.651105e+01 1.476000e+00
      vertex -3.643597e+01 -3.269694e+01 1.876000e+00
      vertex -3.643597e+01 -2.651105e+01 1.876000e+00
    endloop
  endfacet
  facet normal 0.000000e+00 -1.000000e+00 0.000000e+00
    outer loop
      vertex -3.816802e+01 -2.651105e+01 1.476000e+00
      vertex -3.643597e+01 -2.651105e+01 1.476000e+00
      vertex -3.643597e+01 -2.651105e+01 1.876000e+00
    endloop
  endfacet
  facet normal 0.000000e+00 -1.000000e+00 0.000000e+00
    outer loop
      vertex -3.816802e+01 -2.651105e+01 1.476000e+00
      vertex -3.643597e+01 -2.651105e+01 1.876000e+00
      vertex -3.816802e+01 -2.651105e+01 1.876000e+00
    endloop
  endfacet
  facet normal 1.000000e+00 0.000000e+00 0.000000e+00
    outer loop
      vertex -3.816802e+01 2.888709e+01 1.476000e+00
      vertex -3.816802e+01 3.507298e+01 1.476000e+00
      vertex -3.816802e+01 3.507298e+01 1.876000e+00
    endloop
  endfacet
  facet normal 1.000000e+00 0.000000e+00 0.000000e+00
    outer loop
      vertex -3.816802e+01 2.888709e+01 1.476000e+00
      vertex -3.816802e+01 3.507298e+01 1.876000e+00
      vertex -3.816802e+01 2.888709e+01 1.876000e+00
    endloop
  endfacet
  facet normal 0.000000e+00 1.000000e+00 0.000000e+00
    outer loop
      vertex -3.643597e+01 2.888709e+01 1.476000e+00
      vertex -3.816802e+01 2.888709e+01 1.476000e+00
      vertex -3.816802e+01 2.888709e+01 1.876000e+00
    endloop
  endfacet
  facet normal 0.000000e+00 1.000000e+00 0.000000e+00
    outer loop
      vertex -3.643597e+01 2.888709e+01 1.476000e+00
      vertex -3.816802e+01 2.888709e+01 1.876000e+00
      vertex -3.643597e+01 2.888709e+01 1.876000e+00
    endloop
  endfacet
  facet normal -1.000000e+00 -0.000000e+00 -0.000000e+00
    outer loop
      vertex -3.643597e+01 3.507298e+01 1.476000e+00
      vertex -3.643597e+01 2.888709e+01 1.476000e+00
      vertex -3.643597e+01 2.888709e+01 1.876000e+00
    endloop
  endfacet
  facet normal -1.000000e+00 -0.000000e+00 -0.000000e+00
    outer loop
      vertex -3.643597e+01 3.507298e+01 1.476000e+00
      vertex -3.643597e+01 2.888709e+01 1.876000e+00
      vertex -3.643597e+01 3.507298e+01 1.876000e+00
    endloop
  endfacet
  facet normal 0.000000e+00 -1.000000e+00 0.000000e+00
    outer loop
      vertex -3.816802e+01 3.507298e+01 1.476000e+00
      vertex -3.643597e+01 3.507298e+01 1.476000e+00
      vertex -3.643597e+01 3.507298e+01 1.876000e+00
    endloop
  endfacet
  facet normal 0.000000e+00 -1.000000e+00 0.000000e+00
    outer loop
      vertex -3.816802e+01 3.507298e+01 1.476000e+00
      vertex -3.643597e+01 3.507298e+01 1.876000e+00
      vertex -3.816802e+01 3.507298e+01 1.876000e+00
    endloop
  endfacet
  facet normal 1.000000e+00 0.000000e+00 0.000000e+00
    outer loop
      vertex -3.047002e+01 -1.904926e+00 1.476000e+00
      vertex -3.047002e+01 4.280970e+00 1.476000e+00
      vertex -3.047002e+01 4.280970e+00 1.876000e+00
    endloop
  endfacet
  facet normal 1.000000e+00 0.000000e+00 0.000000e+00
    outer loop
      vertex -3.047002e+01 -1.904926e+00 1.476000e+00
      vertex -3.047002e+01 4.280970e+00 1.876000e+00
      vertex -3.047002e+01 -1.904926e+00 1.876000e+00
    endloop
  endfacet
  facet normal 0.000000e+00 1.000000e+00 0.000000e+00
    outer loop
      vertex -2.873797e+01 -1.904926e+00 1.476000e+00
      vertex -3.047002e+01 -1.904926e+00 1.476000e+00
      vertex -3.047002e+01 -1.904926e+00 1.876000e+00
    endloop
  endfacet
  facet normal 0.000000e+00 1.000000e+00 0.000000e+00
    outer loop
      vertex -2.873797e+01 -1.904926e+00 1.476000e+00
      vertex -3.047002e+01 -1.904926e+00 1.876000e+00
      vertex -2.873797e+01 -1.904926e+00 1.876000e+00
    endloop
  endfacet
  facet normal -1.000000e+00 -0.000000e+00 -0.000000e+00
    outer loop
      vertex -2.873797e+01 4.280970e+00 1.476000e+00
      vertex -2.873797e+01 -1.904926e+00 1.476000e+00
      vertex -2.873797e+01 -1.904926e+00 1.876000e+00
    endloop
  endfacet
  facet normal -1.000000e+00 -0.000000e+00 -0.000000e+00
    outer loop
      vertex -2.873797e+01 4.280970e+00 1.476000e+00
      vertex -2.873797e+01 -1.904926e+00 1.876000e+00
      vertex -2.873797e+01 4.280970e+00 1.876000e+00
    endloop
  endfacet
  facet normal 0.000000e+00 -1.000000e+00 0.000000e+00
    outer loop
      vertex -3.047002e+01 4.280970e+00 1.476000e+00
      vertex -2.873797e+01 4.280970e+00 1.476000e+00
      vertex -2.873797e+01 4.280970e+00 1.876000e+00
    endloop
  endfacet
  facet normal 0.000000e+00 -1.000000e+00 0.000000e+00
    outer loop
      vertex -3.047002e+01 4.280970e+00 1.476000e+00
      vertex -2.873797e+01 4.280970e+00 1.876000e+00
      vertex -3.047002e+01 4.280970e+00 1.876000e+00
    endloop
  endfacet
  facet normal 1.000000e+00 0.000000e+00 0.000000e+00
    outer loop
      vertex -2.277201e+01 -4.809295e+01 1.476000e+00
      vertex -2.277201e+01 -4.190705e+01 1.476000e+00
      vertex -2.277201e+01 -4.190705e+01 1.876000e+00
    endloop
  endfacet
  facet normal 1.000000e+00 0.000000e+00 0.000000e+00
    outer loop
      vertex -2.277201e+01 -4.809295e+01 1.476000e+00
      vertex -2.277201e+01 -4.190705e+01 1.876000e+00
      vertex -2.277201e+01 -4.809295e+01 1.876000e+00
    endloop
  endfacet
  facet normal 0.000000e+00 1.000000e+00 0.000000e+00
    outer loop
      vertex -2.103996e+01 -4.809295e+01 1.476000e+00
      vertex -2.277201e+01 -4.809295e+01 1.476000e+00
      vertex -2.277201e+01 -4.809295e+01 1.876000e+00
    endloop
  endfacet
  facet normal 0.000000e+00 1.000000e+00 0.000000e+00
    outer loop
      vertex -2.103996e+01 -4.809295e+01 1.476000e+00
      vertex -2.277201e+01 -4.809295e+01 1.876000e+00
      vertex -2.103996e+01 -4.809295e+01 1.876000e+00
    endloop
  endfacet
  facet normal -1.000000e+00 -0.000000e+00 -0.000000e+00
    outer loop
      vertex -2.103996e+01 -4.190705e+01 1.476000e+00
      vertex -2.103996e+01 -4.809295e+01 1.476000e+00
      vertex -2.103996e+01 -4.809295e+01 1.876000e+00
    endloop
  endfacet
  facet normal -1.000000e+00 -0.000000e+00 -0.000000e+00
    outer loop
      vertex -2.103996e+01 -4.190705e+01 1.476000e+00
      vertex -2.103996e+01 -4.809295e+01 1.876000e+00
      vertex -2.103996e+01 -4.190705e+01 1.876000e+00
    endloop
  endfacet
  facet normal 0.000000e+00 -1.000000e+00 0.000000e+00
    outer loop
      vertex -2.277201e+01 -4.190705e+01 1.476000e+00
      vertex -2.103996e+01 -4.190705e+01 1.476000e+00
      vertex -2.103996e+01 -4.190705e+01 1.876000e+00
    endloop
  endfacet
  facet normal 0.000000e+00 -1.000000e+00 0.000000e+00
    outer loop
      vertex -2.277201e+01 -4.190705e+01 1.476000e+00
      vertex -2.103996e+01 -4.190705e+01 1.876000e+00
      vertex -2.277201e+01 -4.190705e+01 1.876000e+00
    endloop
  endfacet
  facet normal 1.000000e+00 0.000000e+00 0.000000e+00
    outer loop
      vertex -2.277201e+01 3.658509e+01 1.476000e+00
      vertex -2.277201e+01 4.277099e+01 1.476000e+00
      vertex -2.277201e+01 4.277099e+01 1.876000e+00
    endloop
  endfacet
  facet normal 1.000000e+00 0.000000e+00 0.000000e+00
    outer loop
      vertex -2.277201e+01 3.658509e+01 1.476000e+00
      vertex -2.277201e+01 4.277099e+01 1.876000e+00
      vertex -2.277201e+01 3.658509e+01 1.876000e+00
    endloop
  endfacet
  facet normal 0.000000e+00 1.000000e+00 0.000000e+00
    outer loop
      vertex -2.103996e+01 3.658509e+01 1.476000e+00
      vertex -2.277201e+01 3.658509e+01 1.476000e+00
      vertex -2.277201e+01 3.658509e+01 1.876000e+00
    endloop
  endfacet
  facet normal 0.000000e+00 1.000000e+00 0.000000e+00
    outer loop
      vertex -2.103996e+01 3.658509e+01 1.476000e+00
      vertex -2.277201e+01 3.658509e+01 1.876000e+00
      vertex -2.103996e+01 3.658509e+01 1.876000e+00
    endloop
  endfacet
  facet normal -1.000000e+00 -0.000000e+00 -0.000000e+00
    outer loop
      vertex -2.103996e+01 4.277099e+01 1.476000e+00
      vertex -2.103996e+01 3.658509e+01 1.476000e+00
      vertex -2.103996e+01 3.658509e+01 1.876000e+00
    endloop
  endfacet
  facet normal -1.000000e+00 -0.000000e+00 -0.000000e+00
    outer loop
      vertex -2.103996e+01 4.277099e+01 1.476000e+00
      vertex -2.103996e+01 3.658509e+01 1.876000e+00
      vertex -2.103996e+01 4.277099e+01 1.876000e+00
    endloop
  endfacet
  facet normal 0.000000e+00 -1.000000e+00 0.000000e+00
    outer loop
      vertex -2.277201e+01 4.277099e+01 1.476000e+00
      vertex -2.103996e+01 4.277099e+01 1.476000e+00
      vertex -2.103996e+01 4.277099e+01 1.876000e+00
    endloop
  endfacet
  facet normal 0.000000e+00 -1.000000e+00 0.000000e+00
    outer loop
      vertex -2.277201e+01 4.277099e+01 1.476000e+00
      vertex -2.103996e+01 4.277099e+01 1.876000e+00
      vertex -2.277201e+01 4.277099e+01 1.876000e+00
    endloop
  endfacet
  facet normal 1.000000e+00 0.000000e+00 0.000000e+00
    outer loop
      vertex -1.507401e+01 -1.904926e+00 1.476000e+00
      vertex -1.507401e+01 4.280970e+00 1.476000e+00
      vertex -1.507401e+01 4.280970e+00 1.876000e+00
    endloop
  endfacet
  facet normal 1.000000e+00 0.000000e+00 0.000000e+00
    outer loop
      vertex -1.507401e+01 -1.904926e+00 1.476000e+00
      vertex -1.507401e+01 4.280970e+00 1.876000e+00
      vertex -1.507401e+01 -1.904926e+00 1.876000e+00
    endloop
  endfacet
  facet normal 0.000000e+00 1.000000e+00 0.000000e+00
    outer loop
      vertex -1.334196e+01 -1.904926e+00 1.476000e+00
      vertex -1.507401e+01 -1.904926e+00 1.476000e+00
      vertex -1.507401e+01 -1.904926e+00 1.876000e+00
    endloop
  endfacet
  facet normal 0.000000e+00 1.000000e+00 0.000000e+00
    outer loop
      vertex -1.334196e+01 -1.904926e+00 1.476000e+00
      vertex -1.507401e+01 -1.904926e+00 1.876000e+00
      vertex -1.334196e+01 -1.904926e+00 1.876000e+00
    endloop
  endfacet
  facet normal -1.000000e+00 -0.000000e+00 -0.000000e+00
    outer loop
      vertex -1.334196e+01 4.280970e+00 1.476000e+00
      vertex -1.334196e+01 -1.904926e+00 1.476000e+00
      vertex -1.334196e+01 -1.904926e+00 1.876000e+00
    endloop
  endfacet
  facet normal -1.000000e+00 -0.000000e+00 -0.000000e+00
    outer loop
      vertex -1.334196e+01 4.280970e+00 1.476000e+00
      vertex -1.334196e+01 -1.904926e+00 1.876000e+00
      vertex -1.334196e+01 4.280970e+00 1.876000e+00
    endloop
  endfacet
  facet normal 0.000000e+00 -1.000000e+00 0.000000e+00
    outer loop
      vertex -1.507401e+01 4.280970e+00 1.476000e+00
      vertex -1.334196e+01 4.280970e+00 1.476000e+00
      vertex -1.334196e+01 4.280970e+00 1.876000e+00
    endloop
  endfacet
  facet normal 0.000000e+00 -1.000000e+00 0.000000e+00
    outer loop
      vertex -1.507401e+01 4.280970e+00 1.476000e+00
      vertex -1.334196e+01 4.280970e+00 1.876000e+00
      vertex -1.507401e+01 4.280970e+00 1.876000e+00
    endloop
  endfacet
  facet normal 1.000000e+00 0.000000e+00 0.000000e+00
    outer loop
      vertex -4.586602e+01 -1.730093e+01 1.476000e+00
      vertex -4.586602e+01 -1.111504e+01 1.476000e+00
      vertex -4.586602e+01 -1.111504e+01 1.876000e+00
    endloop
  endfacet
  facet normal 1.000000e+00 0.000000e+00 0.000000e+00
    outer loop
      vertex -4.586602e+01 -1.730093e+01 1.476000e+00
      vertex -4.586602e+01 -1.111504e+01 1.876000e+00
      vertex -4.586602e+01 -1.730093e+01 1.876000e+00
    endloop
  endfacet
  facet normal 0.000000e+00 1.000000e+00 0.000000e+00
    outer loop
      vertex -4.413398e+01 -1.730093e+01 1.476000e+00
      vertex -4.586602e+01 -1.730093e+01 1.476000e+00
      vertex -4.586602e+01 -1.730093e+01 1.876000e+00
    endloop
  endfacet
  facet normal 0.000000e+00 1.000000e+00 0.000000e+00
    outer loop
      vertex -4.413398e+01 -1.730093e+01 1.476000e+00
      vertex -4.586602e+01 -1.730093e+01 1.876000e+00
      vertex -4.413398e+01 -1.730093e+01 1.876000e+00
    endloop
  endfacet
  facet normal -1.000000e+00 -0.000000e+00 -0.000000e+00
    outer loop
      vertex -4.413398e+01 -1.111504e+01 1.476000e+00
      vertex -4.413398e+01 -1.730093e+01 1.476000e+00
      vertex -4.413398e+01 -1.730093e+01 1.876000e+00
    endloop
  endfacet
  facet normal -1.000000e+00 -0.000000e+00 -0.000000e+00
    outer loop
      vertex -4.413398e+01 -1.111504e+01 1.476000e+00
      vertex -4.413398e+01 -1.730093e+01 1.876000e+00
      vertex -4.413398e+01 -1.111504e+01 1.876000e+00
    endloop
  endfacet
  facet normal 0.000000e+00 -1.000000e+00 0.000000e+00
    outer loop
      vertex -4.586602e+01 -1.111504e+01 1.476000e+00
      vertex -4.413398e+01 -1.111504e+01 1.476000e+00
      vertex -4.413398e+01 -1.111504e+01 1.876000e+00
    endloop
  endfacet
  facet normal 0.000000e+00 -1.000000e+00 0.000000e+00
    outer loop
      vertex -4.586602e+01 -1.111504e+01 1.476000e+00
      vertex -4.413398e+01 -1.111504e+01 1.876000e+00
      vertex -4.586602e+01 -1.111504e+01 1.876000e+00
    endloop
  endfacet
  facet normal 1.000000e+00 0.000000e+00 0.000000e+00
    outer loop
      vertex -7.376008e+00 2.888709e+01 1.476000e+00
      vertex -7.376008e+00 3.507298e+01 1.476000e+00
      vertex -7.376008e+00 3.507298e+01 1.876000e+00
    endloop
  endfacet
  facet normal 1.000000e+00 0.000000e+00 0.000000e+00
    outer loop
      vertex -7.376008e+00 2.888709e+01 1.476000e+00
      vertex -7.376008e+00 3.507298e+01 1.876000e+00
      vertex -7.376008e+00 2.888709e+01 1.876000e+00
    endloop
  endfacet
  facet normal 0.000000e+00 1.000000e+00 0.000000e+00
    outer loop
      vertex -5.643957e+00 2.888709e+01 1.476000e+00
      vertex -7.376008e+00 2.888709e+01 1.476000e+00
      vertex -7.376008e+00 2.888709e+01 1.876000e+00
    endloop
  endfacet
  facet normal 0.000000e+00 1.000000e+00 0.000000e+00
    outer loop
      vertex -5.643957e+00 2.888709e+01 1.476000e+00
      vertex -7.376008e+00 2.888709e+01 1.876000e+00
      vertex -5.643957e+00 2.888709e+01 1.876000e+00
    endloop
  endfacet
  facet normal -1.000000e+00 -0.000000e+00 -0.000000e+00
    outer loop
      vertex -5.643957e+00 3.507298e+01 1.476000e+00
      vertex -5.643957e+00 2.888709e+01 1.476000e+00
      vertex -5.643957e+00 2.888709e+01 1.876000e+00
    endloop
  endfacet
  facet normal -1.000000e+00 -0.000000e+00 -0.000000e+00
    outer loop
      vertex -5.643957e+00 3.507298e+01 1.476000e+00
      vertex -5.643957e+00 2.888709e+01 1.876000e+00
      vertex -5.643957e+00 3.507298e+01 1.876000e+00
    endloop
  endfacet
  facet normal 0.000000e+00 -1.000000e+00 0.000000e+00
    outer loop
      vertex -7.376008e+00 3.507298e+01 1.476000e+00
      vertex -5.643957e+00 3.507298e+01 1.476000e+00
      vertex -5.643957e+00 3.507298e+01 1.876000e+00
    endloop
  endfacet
  facet normal 0.000000e+00 -1.000000e+00 0.000000e+00
    outer loop
      vertex -7.376008e+00 3.507298e+01 1.476000e+00
      vertex -5.643957e+00 3.507298e+01 1.876000e+00
      vertex -7.376008e+00 3.507298e+01 1.876000e+00
    endloop
  endfacet
  facet normal 1.000000e+00 0.000000e+00 0.000000e+00
    outer loop
      vertex 3.219961e-01 5.793077e+00 1.476000e+00
      vertex 3.219961e-01 1.197897e+01 1.476000e+00
      vertex 3.219961e-01 1.197897e+01 1.876000e+00
    endloop
  endfacet
  facet normal 1.000000e+00 0.000000e+00 0.000000e+00
    outer loop
      vertex 3.219961e-01 5.793077e+00 1.476000e+00
      vertex 3.219961e-01 1.197897e+01 1.876000e+00
      vertex 3.219961e-01 5.793077e+00 1.876000e+00
    endloop
  endfacet
  facet normal 0.000000e+00 1.000000e+00 0.000000e+00
    outer loop
      vertex 2.054047e+00 5.793077e+00 1.476000e+00
      vertex 3.219961e-01 5.793077e+00 1.476000e+00
      vertex 3.219961e-01 5.793077e+00 1.876000e+00
    endloop
  endfacet
  facet normal 0.000000e+00 1.000000e+00 0.000000e+00
    outer loop
      vertex 2.054047e+00 5.793077e+00 1.476000e+00
      vertex 3.219961e-01 5.793077e+00 1.876000e+00
      vertex 2.054047e+00 5.793077e+00 1.876000e+00
    endloop
  endfacet
  facet normal -1.000000e+00 -0.000000e+00 -0.000000e+00
    outer loop
      vertex 2.054047e+00 1.197897e+01 1.476000e+00
      vertex 2.054047e+00 5.793077e+00 1.476000e+00
      vertex 2.054047e+00 5.793077e+00 1.876000e+00
    endloop
  endfacet
  facet normal -1.000000e+00 -0.000000e+00 -0.000000e+00
    outer loop
      vertex 2.054047e+00 1.197897e+01 1.476000e+00
      vertex 2.054047e+00 5.793077e+00 1.876000e+00
      vertex 2.054047e+00 1.197897e+01 1.876000e+00
    endloop
  endfacet
  facet normal 0.000000e+00 -1.000000e+00 0.000000e+00
    outer loop
      vertex 3.219961e-01 1.197897e+01 1.476000e+00
      vertex 2.054047e+00 1.197897e+01 1.476000e+00
      vertex 2.054047e+00 1.197897e+01 1.876000e+00
    endloop
  endfacet
  facet normal 0.000000e+00 -1.000000e+00 0.000000e+00
    outer loop
      vertex 3.219961e-01 1.197897e+01 1.476000e+00
      vertex 2.054047e+00 1.197897e+01 1.876000e+00
      vertex 3.219961e-01 1.197897e+01 1.876000e+00
    endloop
  endfacet
  facet normal 1.000000e+00 0.000000e+00 0.000000e+00
    outer loop
      vertex 8.020000e+00 -4.039494e+01 1.476000e+00
      vertex 8.020000e+00 -3.420905e+01 1.476000e+00
      vertex 8.020000e+00 -3.420905e+01 1.876000e+00
    endloop
  endfacet
  facet normal 1.000000e+00 0.000000e+00 0.000000e+00
    outer loop
      vertex 8.020000e+00 -4.039494e+01 1.476000e+00
      vertex 8.020000e+00 -3.420905e+01 1.876000e+00
      vertex 8.020000e+00 -4.039494e+01 1.876000e+00
    endloop
  endfacet
  facet normal 0.000000e+00 1.000000e+00 0.000000e+00
    outer loop
      vertex 9.752050e+00 -4.039494e+01 1.476000e+00
      vertex 8.020000e+00 -4.039494e+01 1.476000e+00
      vertex 8.020000e+00 -4.039494e+01 1.876000e+00
    endloop
  endfacet
  facet normal 0.000000e+00 1.000000e+00 0.000000e+00
    outer loop
      vertex 9.752050e+00 -4.039494e+01 1.476000e+00
      vertex 8.020000e+00 -4.039494e+01 1.876000e+00
      vertex 9.752050e+00 -4.039494e+01 1.876000e+00
    endloop
  endfacet
  facet normal -1.000000e+00 -0.000000e+00 -0.000000e+00
    outer loop
      vertex 9.752050e+00 -3.420905e+01 1.476000e+00
      vertex 9.752050e+00 -4.039494e+01 1.476000e+00
      vertex 9.752050e+00 -4.039494e+01 1.876000e+00
    endloop
  endfacet
  facet normal -1.000000e+00 -0.000000e+00 -0.000000e+00
    outer loop
      vertex 9.752050e+00 -3.420905e+01 1.476000e+00
      vertex 9.752050e+00 -4.039494e+01 1.876000e+00
      vertex 9.752050e+00 -3.420905e+01 1.876000e+00
    endloop
  endfacet
  facet normal 0.000000e+00 -1.000000e+00 0.000000e+00
    outer loop
      vertex 8.020000e+00 -3.420905e+01 1.476000e+00
      vertex 9.752050e+00 -3.420905e+01 1.476000e+00
      vertex 9.752050e+00 -3.420905e+01 1.876000e+00
    endloop
  endfacet
  facet normal 0.000000e+00 -1.000000e+00 0.000000e+00
    outer loop
      vertex 8.020000e+00 -3.420905e+01 1.476000e+00
      vertex 9.752050e+00 -3.420905e+01 1.876000e+00
      vertex 8.020000e+00 -3.420905e+01 1.876000e+00
    endloop
  endfacet
  facet normal 1.000000e+00 0.000000e+00 0.000000e+00
    outer loop
      vertex 8.020000e+00 2.118908e+01 1.476000e+00
      vertex 8.020000e+00 2.737498e+01 1.476000e+00
      vertex 8.020000e+00 2.737498e+01 1.876000e+00
    endloop
  endfacet
  facet normal 1.000000e+00 0.000000e+00 0.000000e+00
    outer loop
      vertex 8.020000e+00 2.118908e+01 1.476000e+00
      vertex 8.020000e+00 2.737498e+01 1.876000e+00
      vertex 8.020000e+00 2.118908e+01 1.876000e+00
    endloop
  endfacet
  facet normal 0.000000e+00 1.000000e+00 0.000000e+00
    outer loop
      vertex 9.752050e+00 2.118908e+01 1.476000e+00
      vertex 8.020000e+00 2.118908e+01 1.476000e+00
      vertex 8.020000e+00 2.118908e+01 1.876000e+00
    endloop
  endfacet
  facet normal 0.000000e+00 1.000000e+00 0.000000e+00
    outer loop
      vertex 9.752050e+00 2.118908e+01 1.476000e+00
      vertex 8.020000e+00 2.118908e+01 1.876000e+00
      vertex 9.752050e+00 2.118908e+01 1.876000e+00
    endloop
  endfacet
  facet normal -1.000000e+00 -0.000000e+00 -0.000000e+00
    outer loop
      vertex 9.752050e+00 2.737498e+01 1.476000e+00
      vertex 9.752050e+00 2.118908e+01 1.476000e+00
      vertex 9.752050e+00 2.118908e+01 1.876000e+00
    endloop
  endfacet
  facet normal -1.000000e+00 -0.000000e+00 -0.000000e+00
    outer loop
      vertex 9.752050e+00 2.737498e+01 1.476000e+00
      vertex 9.752050e+00 2.118908e+01 1.876000e+00
      vertex 9.752050e+00 2.737498e+01 1.876000e+00
    endloop
  endfacet
  facet normal 0.000000e+00 -1.000000e+00 0.000000e+00
    outer loop
      vertex 8.020000e+00 2.737498e+01 1.476000e+00
      vertex 9.752050e+00 2.737498e+01 1.476000e+00
      vertex 9.752050e+00 2.737498e+01 1.876000e+00
    endloop
  endfacet
  facet normal 0.000000e+00 -1.000000e+00 0.000000e+00
    outer loop
      vertex 8.020000e+00 2.737498e+01 1.476000e+00
      vertex 9.752050e+00 2.737498e+01 1.876000e+00
      vertex 8.020000e+00 2.737498e+01 1.876000e+00
    endloop
  endfacet
  facet normal 1.000000e+00 0.000000e+00 0.000000e+00
    outer loop
      vertex 1.571800e+01 -1.730093e+01 1.476000e+00
      vertex 1.571800e+01 -1.111504e+01 1.476000e+00
      vertex 1.571800e+01 -1.111504e+01 1.876000e+00
    endloop
  endfacet
  facet normal 1.000000e+00 0.000000e+00 0.000000e+00
    outer loop
      vertex 1.571800e+01 -1.730093e+01 1.476000e+00
      vertex 1.571800e+01 -1.111504e+01 1.876000e+00
      vertex 1.571800e+01 -1.730093e+01 1.876000e+00
    endloop
  endfacet
  facet normal 0.000000e+00 1.000000e+00 0.000000e+00
    outer loop
      vertex 1.745005e+01 -1.730093e+01 1.476000e+00
      vertex 1.571800e+01 -1.730093e+01 1.476000e+00
      vertex 1.571800e+01 -1.730093e+01 1.876000e+00
    endloop
  endfacet
  facet normal 0.000000e+00 1.000000e+00 0.000000e+00
    outer loop
      vertex 1.745005e+01 -1.730093e+01 1.476000e+00
      vertex 1.571800e+01 -1.730093e+01 1.876000e+00
      vertex 1.745005e+01 -1.730093e+01 1.876000e+00
    endloop
  endfacet
  facet normal -1.000000e+00 -0.000000e+00 -0.000000e+00
    outer loop
      vertex 1.745005e+01 -1.111504e+01 1.476000e+00
      vertex 1.745005e+01 -1.730093e+01 1.476000e+00
      vertex 1.745005e+01 -1.730093e+01 1.876000e+00
    endloop
  endfacet
  facet normal -1.000000e+00 -0.000000e+00 -0.000000e+00
    outer loop
      vertex 1.745005e+01 -1.111504e+01 1.476000e+00
      vertex 1.745005e+01 -1.730093e+01 1.876000e+00
      vertex 1.745005e+01 -1.111504e+01 1.876000e+00
    endloop
  endfacet
  facet normal 0.000000e+00 -1.000000e+00 0.000000e+00
    outer loop
      vertex 1.571800e+01 -1.111504e+01 1.476000e+00
      vertex 1.745005e+01 -1.111504e+01 1.476000e+00
      vertex 1.745005e+01 -1.111504e+01 1.876000e+00
    endloop
  endfacet
  facet normal 0.000000e+00 -1.000000e+00 0.000000e+00
    outer loop
      vertex 1.571800e+01 -1.111504e+01 1.476000e+00
      vertex 1.745005e+01 -1.111504e+01 1.876000e+00
      vertex 1.571800e+01 -1.111504e+01 1.876000e+00
    endloop
  endfacet
  facet normal 1.000000e+00 0.000000e+00 0.000000e+00
    outer loop
      vertex 2.341601e+01 -3.269694e+01 1.476000e+00
      vertex 2.341601e+01 -2.651105e+01 1.476000e+00
      vertex 2.341601e+01 -2.651105e+01 1.876000e+00
    endloop
  endfacet
  facet normal 1.000000e+00 0.000000e+00 0.000000e+00
    outer loop
      vertex 2.341601e+01 -3.269694e+01 1.476000e+00
      vertex 2.341601e+01 -2.651105e+01 1.876000e+00
      vertex 2.341601e+01 -3.269694e+01 1.876000e+00
    endloop
  endfacet
  facet normal 0.000000e+00 1.000000e+00 0.000000e+00
    outer loop
      vertex 2.514806e+01 -3.269694e+01 1.476000e+00
      vertex 2.341601e+01 -3.269694e+01 1.476000e+00
      vertex 2.341601e+01 -3.269694e+01 1.876000e+00
    endloop
  endfacet
  facet normal 0.000000e+00 1.000000e+00 0.000000e+00
    outer loop
      vertex 2.514806e+01 -3.269694e+01 1.476000e+00
      vertex 2.341601e+01 -3.269694e+01 1.876000e+00
      vertex 2.514806e+01 -3.269694e+01 1.876000e+00
    endloop
  endfacet
  facet normal -1.000000e+00 -0.000000e+00 -0.000000e+00
    outer loop
      vertex 2.514806e+01 -2.651105e+01 1.476000e+00
      vertex 2.514806e+01 -3.269694e+01 1.476000e+00
      vertex 2.514806e+01 -3.269694e+01 1.876000e+00
    endloop
  endfacet
  facet normal -1.000000e+00 -0.000000e+00 -0.000000e+00
    outer loop
      vertex 2.514806e+01 -2.651105e+01 1.476000e+00
      vertex 2.514806e+01 -3.269694e+01 1.876000e+00
      vertex 2.514806e+01 -2.651105e+01 1.876000e+00
    endloop
  endfacet
  facet normal 0.000000e+00 -1.000000e+00 0.000000e+00
    outer loop
      vertex 2.341601e+01 -2.651105e+01 1.476000e+00
      vertex 2.514806e+01 -2.651105e+01 1.476000e+00
      vertex 2.514806e+01 -2.651105e+01 1.876000e+00
    endloop
  endfacet
  facet normal 0.000000e+00 -1.000000e+00 0.000000e+00
    outer loop
      vertex 2.341601e+01 -2.651105e+01 1.476000e+00
      vertex 2.514806e+01 -2.651105e+01 1.876000e+00
      vertex 2.341601e+01 -2.651105e+01 1.876000e+00
    endloop
  endfacet
  facet normal 1.000000e+00 0.000000e+00 0.000000e+00
    outer loop
      vertex 2.341601e+01 2.888709e+01 1.476000e+00
      vertex 2.341601e+01 3.507298e+01 1.476000e+00
      vertex 2.341601e+01 3.507298e+01 1.876000e+00
    endloop
  endfacet
  facet normal 1.000000e+00 0.000000e+00 0.000000e+00
    outer loop
      vertex 2.341601e+01 2.888709e+01 1.476000e+00
      vertex 2.341601e+01 3.507298e+01 1.876000e+00
      vertex 2.341601e+01 2.888709e+01 1.876000e+00
    endloop
  endfacet
  facet normal 0.000000e+00 1.000000e+00 0.000000e+00
    outer loop
      vertex 2.514806e+01 2.888709e+01 1.476000e+00
      vertex 2.341601e+01 2.888709e+01 1.476000e+00
      vertex 2.341601e+01 2.888709e+01 1.876000e+00
    endloop
  endfacet
  facet normal 0.000000e+00 1.000000e+00 0.000000e+00
    outer loop
      vertex 2.514806e+01 2.888709e+01 1.476000e+00
      vertex 2.341601e+01 2.888709e+01 1.876000e+00
      vertex 2.514806e+01 2.888709e+01 1.876000e+00
    endloop
  endfacet
  facet normal -1.000000e+00 -0.000000e+00 -0.000000e+00
    outer loop
      vertex 2.514806e+01 3.507298e+01 1.476000e+00
      vertex 2.514806e+01 2.888709e+01 1.476000e+00
      vertex 2.514806e+01 2.888709e+01 1.876000e+00
    endloop
  endfacet
  facet normal -1.000000e+00 -0.000000e+00 -0.000000e+00
    outer loop
      vertex 2.514806e+01 3.507298e+01 1.476000e+00
      vertex 2.514806e+01 2.888709e+01 1.876000e+00
      vertex 2.514806e+01 3.507298e+01 1.876000e+00
    endloop
  endfacet
  facet normal 0.000000e+00 -1.000000e+00 0.000000e+00
    outer loop
      vertex 2.341601e+01 3.507298e+01 1.476000e+00
      vertex 2.514806e+01 3.507298e+01 1.476000e+00
      vertex 2.514806e+01 3.507298e+01 1.876000e+00
    endloop
  endfacet
  facet normal 0.000000e+00 -1.000000e+00 0.000000e+00
    outer loop
      vertex 2.341601e+01 3.507298e+01 1.476000e+00
      vertex 2.514806e+01 3.507298e+01 1.876000e+00
      vertex 2.341601e+01 3.507298e+01 1.876000e+00
    endloop
  endfacet
  facet normal 1.000000e+00 0.000000e+00 0.000000e+00
    outer loop
      vertex 3.111401e+01 2.118908e+01 1.476000e+00
      vertex 3.111401e+01 2.737498e+01 1.476000e+00
      vertex 3.111401e+01 2.737498e+01 1.876000e+00
    endloop
  endfacet
  facet normal 1.000000e+00 0.000000e+00 0.000000e+00
    outer loop
      vertex 3.111401e+01 2.118908e+01 1.476000e+00
      vertex 3.111401e+01 2.737498e+01 1.876000e+00
      vertex 3.111401e+01 2.118908e+01 1.876000e+00
    endloop
  endfacet
  facet normal 0.000000e+00 1.000000e+00 0.000000e+00
    outer loop
      vertex 3.284606e+01 2.118908e+01 1.476000e+00
      vertex 3.111401e+01 2.118908e+01 1.476000e+00
      vertex 3.111401e+01 2.118908e+01 1.876000e+00
    endloop
  endfacet
  facet normal 0.000000e+00 1.000000e+00 0.000000e+00
    outer loop
      vertex 3.284606e+01 2.118908e+01 1.476000e+00
      vertex 3.111401e+01 2.118908e+01 1.876000e+00
      vertex 3.284606e+01 2.118908e+01 1.876000e+00
    endloop
  endfacet
  facet normal -1.000000e+00 -0.000000e+00 -0.000000e+00
    outer loop
      vertex 3.284606e+01 2.737498e+01 1.476000e+00
      vertex 3.284606e+01 2.118908e+01 1.476000e+00
      vertex 3.284606e+01 2.118908e+01 1.876000e+00
    endloop
  endfacet
  facet normal -1.000000e+00 -0.000000e+00 -0.000000e+00
    outer loop
      vertex 3.284606e+01 2.737498e+01 1.476000e+00
      vertex 3.284606e+01 2.118908e+01 1.876000e+00
      vertex 3.284606e+01 2.737498e+01 1.876000e+00
    endloop
  endfacet
  facet normal 0.000000e+00 -1.000000e+00 0.000000e+00
    outer loop
      vertex 3.111401e+01 2.737498e+01 1.476000e+00
      vertex 3.284606e+01 2.737498e+01 1.476000e+00
      vertex 3.284606e+01 2.737498e+01 1.876000e+00
    endloop
  endfacet
  facet normal 0.000000e+00 -1.000000e+00 0.000000e+00
    outer loop
      vertex 3.111401e+01 2.737498e+01 1.476000e+00
      vertex 3.284606e+01 2.737498e+01 1.876000e+00
      vertex 3.111401e+01 2.737498e+01 1.876000e+00
    endloop
  endfacet
  facet normal 1.000000e+00 0.000000e+00 0.000000e+00
    outer loop
      vertex 3.881202e+01 -9.602930e+00 1.476000e+00
      vertex 3.881202e+01 -3.417034e+00 1.476000e+00
      vertex 3.881202e+01 -3.417034e+00 1.876000e+00
    endloop
  endfacet
  facet normal 1.000000e+00 0.000000e+00 0.000000e+00
    outer loop
      vertex 3.881202e+01 -9.602930e+00 1.476000e+00
      vertex 3.881202e+01 -3.417034e+00 1.876000e+00
      vertex 3.881202e+01 -9.602930e+00 1.876000e+00
    endloop
  endfacet
  facet normal 0.000000e+00 1.000000e+00 0.000000e+00
    outer loop
      vertex 4.054406e+01 -9.602930e+00 1.476000e+00
      vertex 3.881202e+01 -9.602930e+00 1.476000e+00
      vertex 3.881202e+01 -9.602930e+00 1.876000e+00
    endloop
  endfacet
  facet normal 0.000000e+00 1.000000e+00 0.000000e+00
    outer loop
      vertex 4.054406e+01 -9.602930e+00 1.476000e+00
      vertex 3.881202e+01 -9.602930e+00 1.876000e+00
      vertex 4.054406e+01 -9.602930e+00 1.876000e+00
    endloop
  endfacet
  facet normal -1.000000e+00 -0.000000e+00 -0.000000e+00
    outer loop
      vertex 4.054406e+01 -3.417034e+00 1.476000e+00
      vertex 4.054406e+01 -9.602930e+00 1.476000e+00
      vertex 4.054406e+01 -9.602930e+00 1.876000e+00
    endloop
  endfacet
  facet normal -1.000000e+00 -0.000000e+00 -0.000000e+00
    outer loop
      vertex 4.054406e+01 -3.417034e+00 1.476000e+00
      vertex 4.054406e+01 -9.602930e+00 1.876000e+00
      vertex 4.054406e+01 -3.417034e+00 1.876000e+00
    endloop
  endfacet
  facet normal 0.000000e+00 -1.000000e+00 0.000000e+00
    outer loop
      vertex 3.881202e+01 -3.417034e+00 1.476000e+00
      vertex 4.054406e+01 -3.417034e+00 1.476000e+00
      vertex 4.054406e+01 -3.417034e+00 1.876000e+00
    endloop
  endfacet
  facet normal 0.000000e+00 -1.000000e+00 0.000000e+00
    outer loop
      vertex 3.881202e+01 -3.417034e+00 1.476000e+00
      vertex 4.054406e+01 -3.417034e+00 1.876000e+00
      vertex 3.881202e+01 -3.417034e+00 1.876000e+00
    endloop
  endfacet
  facet normal 1.000000e+00 0.000000e+00 0.000000e+00
    outer loop
      vertex 3.881202e+01 3.658509e+01 1.476000e+00
      vertex 3.881202e+01 4.277099e+01 1.476000e+00
      vertex 3.881202e+01 4.277099e+01 1.876000e+00
    endloop
  endfacet
  facet normal 1.000000e+00 0.000000e+00 0.000000e+00
    outer loop
      vertex 3.881202e+01 3.658509e+01 1.476000e+00
      vertex 3.881202e+01 4.277099e+01 1.876000e+00
      vertex 3.881202e+01 3.658509e+01 1.876000e+00
    endloop
  endfacet
  facet normal 0.000000e+00 1.000000e+00 0.000000e+00
    outer loop
      vertex 4.054406e+01 3.658509e+01 1.476000e+00
      vertex 3.881202e+01 3.658509e+01 1.476000e+00
      vertex 3.881202e+01 3.658509e+01 1.876000e+00
    endloop
  endfacet
  facet normal 0.000000e+00 1.000000e+00 0.000000e+00
    outer loop
      vertex 4.054406e+01 3.658509e+01 1.476000e+00
      vertex 3.881202e+01 3.658509e+01 1.876000e+00
      vertex 4.054406e+01 3.658509e+01 1.876000e+00
    endloop
  endfacet
  facet normal -1.000000e+00 -0.000000e+00 -0.000000e+00
    outer loop
      vertex 4.054406e+01 4.277099e+01 1.476000e+00
      vertex 4.054406e+01 3.658509e+01 1.476000e+00
      vertex 4.054406e+01 3.658509e+01 1.876000e+00
    endloop
  endfacet
  facet normal -1.000000e+00 -0.000000e+00 -0.000000e+00
    outer loop
      vertex 4.054406e+01 4.277099e+01 1.476000e+00
      vertex 4.054406e+01 3.658509e+01 1.876000e+00
      vertex 4.054406e+01 4.277099e+01 1.876000e+00
    endloop
  endfacet
  facet normal 0.000000e+00 -1.000000e+00 0.000000e+00
    outer loop
      vertex 3.881202e+01 4.277099e+01 1.476000e+00
      vertex 4.054406e+01 4.277099e+01 1.476000e+00
      vertex 4.054406e+01 4.277099e+01 1.876000e+00
    endloop
  endfacet
  facet normal 0.000000e+00 -1.000000e+00 0.000000e+00
    outer loop
      vertex 3.881202e+01 4.277099e+01 1.476000e+00
      vertex 4.054406e+01 4.277099e+01 1.876000e+00
      vertex 3.881202e+01 4.277099e+01 1.876000e+00
    endloop
  endfacet
  facet normal 1.000000e+00 0.000000e+00 0.000000e+00
    outer loop
      vertex -4.586602e+01 2.118908e+01 1.476000e+00
      vertex -4.586602e+01 2.737498e+01 1.476000e+00
      vertex -4.586602e+01 2.737498e+01 1.876000e+00
    endloop
  endfacet
  facet normal 1.000000e+00 0.000000e+00 0.000000e+00
    outer loop
      vertex -4.586602e+01 2.118908e+01 1.476000e+00
      vertex -4.586602e+01 2.737498e+01 1.876000e+00
      vertex -4.586602e+01 2.118908e+01 1.876000e+00
    endloop
  endfacet
  facet normal 0.000000e+00 1.000000e+00 0.000000e+00
    outer loop
      vertex -4.413398e+01 2.118908e+01 1.476000e+00
      vertex -4.586602e+01 2.118908e+01 1.476000e+00
      vertex -4.586602e+01 2.118908e+01 1.876000e+00
    endloop
  endfacet
  facet normal 0.000000e+00 1.000000e+00 0.000000e+00
    outer loop
      vertex -4.413398e+01 2.118908e+01 1.476000e+00
      vertex -4.586602e+01 2.118908e+01 1.876000e+00
      vertex -4.413398e+01 2.118908e+01 1.876000e+00
    endloop
  endfacet
  facet normal -1.000000e+00 -0.000000e+00 -0.000000e+00
    outer loop
      vertex -4.413398e+01 2.737498e+01 1.476000e+00
      vertex -4.413398e+01 2.118908e+01 1.476000e+00
      vertex -4.413398e+01 2.118908e+01 1.876000e+00
    endloop
  endfacet
  facet normal -1.000000e+00 -0.000000e+00 -0.000000e+00
    outer loop
      vertex -4.413398e+01 2.737498e+01 1.476000e+00
      vertex -4.413398e+01 2.118908e+01 1.876000e+00
      vertex -4.413398e+01 2.737498e+01 1.876000e+00
    endloop
  endfacet
  facet normal 0.000000e+00 -1.000000e+00 0.000000e+00
    outer loop
      vertex -4.586602e+01 2.737498e+01 1.476000e+00
      vertex -4.413398e+01 2.737498e+01 1.476000e+00
      vertex -4.413398e+01 2.737498e+01 1.876000e+00
    endloop
  endfacet
  facet normal 0.000000e+00 -1.000000e+00 0.000000e+00
    outer loop
      vertex -4.586602e+01 2.737498e+01 1.476000e+00
      vertex -4.413398e+01 2.737498e+01 1.876000e+00
      vertex -4.586602e+01 2.737498e+01 1.876000e+00
    endloop
  endfacet
  facet normal 1.000000e+00 0.000000e+00 0.000000e+00
    outer loop
      vertex 3.881202e+01 5.793077e+00 1.476000e+00
      vertex 3.881202e+01 1.197897e+01 1.476000e+00
      vertex 3.881202e+01 1.197897e+01 1.876000e+00
    endloop
  endfacet
  facet normal 1.000000e+00 0.000000e+00 0.000000e+00
    outer loop
      vertex 3.881202e+01 5.793077e+00 1.476000e+00
      vertex 3.881202e+01 1.197897e+01 1.876000e+00
      vertex 3.881202e+01 5.793077e+00 1.876000e+00
    endloop
  endfacet
  facet normal 0.000000e+00 1.000000e+00 0.000000e+00
    outer loop
      vertex 4.054406e+01 5.793077e+00 1.476000e+00
      vertex 3.881202e+01 5.793077e+00 1.476000e+00
      vertex 3.881202e+01 5.793077e+00 1.876000e+00
    endloop
  endfacet
  facet normal 0.000000e+00 1.000000e+00 0.000000e+00
    outer loop
      vertex 4.054406e+01 5.793077e+00 1.476000e+00
      vertex 3.881202e+01 5.793077e+00 1.876000e+00
      vertex 4.054406e+01 5.793077e+00 1.876000e+00
    endloop
  endfacet
  facet normal -1.000000e+00 -0.000000e+00 -0.000000e+00
    outer loop
      vertex 4.054406e+01 1.197897e+01 1.476000e+00
      vertex 4.054406e+01 5.793077e+00 1.476000e+00
      vertex 4.054406e+01 5.793077e+00 1.876000e+00
    endloop
  endfacet
  facet normal -1.000000e+00 -0.000000e+00 -0.000000e+00
    outer loop
      vertex 4.054406e+01 1.197897e+01 1.476000e+00
      vertex 4.054406e+01 5.793077e+00 1.876000e+00
      vertex 4.054406e+01 1.197897e+01 1.876000e+00
    endloop
  endfacet
  facet normal 0.000000e+00 -1.000000e+00 0.000000e+00
    outer loop
      vertex 3.881202e+01 1.197897e+01 1.476000e+00
      vertex 4.054406e+01 1.197897e+01 1.476000e+00
      vertex 4.054406e+01 1.197897e+01 1.876000e+00
    endloop
  endfacet
  facet normal 0.000000e+00 -1.000000e+00 0.000000e+00
    outer loop
      vertex 3.881202e+01 1.197897e+01 1.476000e+00
      vertex 4.054406e+01 1.197897e+01 1.876000e+00
      vertex 3.881202e+01 1.197897e+01 1.876000e+00
    endloop
  endfacet
  facet normal 1.000000e+00 0.000000e+00 0.000000e+00
    outer loop
      vertex 3.881202e+01 -4.039494e+01 1.476000e+00
      vertex 3.881202e+01 -3.420905e+01 1.476000e+00
      vertex 3.881202e+01 -3.420905e+01 1.876000e+00
    endloop
  endfacet
  facet normal 1.000000e+00 0.000000e+00 0.000000e+00
    outer loop
      vertex 3.881202e+01 -4.039494e+01 1.476000e+00
      vertex 3.881202e+01 -3.420905e+01 1.876000e+00
      vertex 3.881202e+01 -4.039494e+01 1.876000e+00
    endloop
  endfacet
  facet normal 0.000000e+00 1.000000e+00 0.000000e+00
    outer loop
      vertex 4.054406e+01 -4.039494e+01 1.476000e+00
      vertex 3.881202e+01 -4.039494e+01 1.476000e+00
      vertex 3.881202e+01 -4.039494e+01 1.876000e+00
    endloop
  endfacet
  facet normal 0.000000e+00 1.000000e+00 0.000000e+00
    outer loop
      vertex 4.054406e+01 -4.039494e+01 1.476000e+00
      vertex 3.881202e+01 -4.039494e+01 1.876000e+00
      vertex 4.054406e+01 -4.039494e+01 1.876000e+00
    endloop
  endfacet
  facet normal -1.000000e+00 -0.000000e+00 -0.000000e+00
    outer loop
      vertex 4.054406e+01 -3.420905e+01 1.476000e+00
      vertex 4.054406e+01 -4.039494e+01 1.476000e+00
      vertex 4.054406e+01 -4.039494e+01 1.876000e+00
    endloop
  endfacet
  facet normal -1.000000e+00 -0.000000e+00 -0.000000e+00
    outer loop
      vertex 4.054406e+01 -3.420905e+01 1.476000e+00
      vertex 4.054406e+01 -4.039494e+01 1.876000e+00
      vertex 4.054406e+01 -3.420905e+01 1.876000e+00
    endloop
  endfacet
  facet normal 0.000000e+00 -1.000000e+00 0.000000e+00
    outer loop
      vertex 3.881202e+01 -3.420905e+01 1.476000e+00
      vertex 4.054406e+01 -3.420905e+01 1.476000e+00
      vertex 4.054406e+01 -3.420905e+01 1.876000e+00
    endloop
  endfacet
  facet normal 0.000000e+00 -1.000000e+00 0.000000e+00
    outer loop
      vertex 3.881202e+01 -3.420905e+01 1.476000e+00
      vertex 4.054406e+01 -3.420905e+01 1.876000e+00
      vertex 3.881202e+01 -3.420905e+01 1.876000e+00
    endloop
  endfacet
  facet normal 1.000000e+00 0.000000e+00 0.000000e+00
    outer loop
      vertex 3.111401e+01 -3.269694e+01 1.476000e+00
      vertex 3.111401e+01 -2.651105e+01 1.476000e+00
      vertex 3.111401e+01 -2.651105e+01 1.876000e+00
    endloop
  endfacet
  facet normal 1.000000e+00 0.000000e+00 0.000000e+00
    outer loop
      vertex 3.111401e+01 -3.269694e+01 1.476000e+00
      vertex 3.111401e+01 -2.651105e+01 1.876000e+00
      vertex 3.111401e+01 -3.269694e+01 1.876000e+00
    endloop
  endfacet
  facet normal 0.000000e+00 1.000000e+00 0.000000e+00
    outer loop
      vertex 3.284606e+01 -3.269694e+01 1.476000e+00
      vertex 3.111401e+01 -3.269694e+01 1.476000e+00
      vertex 3.111401e+01 -3.269694e+01 1.876000e+00
    endloop
  endfacet
  facet normal 0.000000e+00 1.000000e+00 0.000000e+00
    outer loop
      vertex 3.284606e+01 -3.269694e+01 1.476000e+00
      vertex 3.111401e+01 -3.269694e+01 1.876000e+00
      vertex 3.284606e+01 -3.269694e+01 1.876000e+00
    endloop
  endfacet
  facet normal -1.000000e+00 -0.000000e+00 -0.000000e+00
    outer loop
      vertex 3.284606e+01 -2.651105e+01 1.476000e+00
      vertex 3.284606e+01 -3.269694e+01 1.476000e+00
      vertex 3.284606e+01 -3.269694e+01 1.876000e+00
    endloop
  endfacet
  facet normal -1.000000e+00 -0.000000e+00 -0.000000e+00
    outer loop
      vertex 3.284606e+01 -2.651105e+01 1.476000e+00
      vertex 3.284606e+01 -3.269694e+01 1.876000e+00
      vertex 3.284606e+01 -2.651105e+01 1.876000e+00
    endloop
  endfacet
  facet normal 0.000000e+00 -1.000000e+00 0.000000e+00
    outer loop
      vertex 3.111401e+01 -2.651105e+01 1.476000e+00
      vertex 3.284606e+01 -2.651105e+01 1.476000e+00
      vertex 3.284606e+01 -2.651105e+01 1.876000e+00
    endloop
  endfacet
  facet normal 0.000000e+00 -1.000000e+00 0.000000e+00
    outer loop
      vertex 3.111401e+01 -2.651105e+01 1.476000e+00
      vertex 3.284606e+01 -2.651105e+01 1.876000e+00
      vertex 3.111401e+01 -2.651105e+01 1.876000e+00
    endloop
  endfacet
  facet normal 1.000000e+00 0.000000e+00 0.000000e+00
    outer loop
      vertex 2.341601e+01 -1.904926e+00 1.476000e+00
      vertex 2.341601e+01 4.280970e+00 1.476000e+00
      vertex 2.341601e+01 4.280970e+00 1.876000e+00
    endloop
  endfacet
  facet normal 1.000000e+00 0.000000e+00 0.000000e+00
    outer loop
      vertex 2.341601e+01 -1.904926e+00 1.476000e+00
      vertex 2.341601e+01 4.280970e+00 1.876000e+00
      vertex 2.341601e+01 -1.904926e+00 1.876000e+00
    endloop
  endfacet
  facet normal 0.000000e+00 1.000000e+00 0.000000e+00
    outer loop
      vertex 2.514806e+01 -1.904926e+00 1.476000e+00
      vertex 2.341601e+01 -1.904926e+00 1.476000e+00
      vertex 2.341601e+01 -1.904926e+00 1.876000e+00
    endloop
  endfacet
  facet normal 0.000000e+00 1.000000e+00 0.000000e+00
    outer loop
      vertex 2.514806e+01 -1.904926e+00 1.476000e+00
      vertex 2.341601e+01 -1.904926e+00 1.876000e+00
      vertex 2.514806e+01 -1.904926e+00 1.876000e+00
    endloop
  endfacet
  facet normal -1.000000e+00 -0.000000e+00 -0.000000e+00
    outer loop
      vertex 2.514806e+01 4.280970e+00 1.476000e+00
      vertex 2.514806e+01 -1.904926e+00 1.476000e+00
      vertex 2.514806e+01 -1.904926e+00 1.876000e+00
    endloop
  endfacet
  facet normal -1.000000e+00 -0.000000e+00 -0.000000e+00
    outer loop
      vertex 2.514806e+01 4.280970e+00 1.476000e+00
      vertex 2.514806e+01 -1.904926e+00 1.876000e+00
      vertex 2.514806e+01 4.280970e+00 1.876000e+00
    endloop
  endfacet
  facet normal 0.000000e+00 -1.000000e+00 0.000000e+00
    outer loop
      vertex 2.341601e+01 4.280970e+00 1.476000e+00
      vertex 2.514806e+01 4.280970e+00 1.476000e+00
      vertex 2.514806e+01 4.280970e+00 1.876000e+00
    endloop
  endfacet
  facet normal 0.000000e+00 -1.000000e+00 0.000000e+00
    outer loop
      vertex 2.341601e+01 4.280970e+00 1.476000e+00
      vertex 2.514806e+01 4.280970e+00 1.876000e+00
      vertex 2.341601e+01 4.280970e+00 1.876000e+00
    endloop
  endfacet
  facet normal 1.000000e+00 0.000000e+00 0.000000e+00
    outer loop
      vertex -4.586602e+01 -1.904926e+00 1.476000e+00
      vertex -4.586602e+01 4.280970e+00 1.476000e+00
      vertex -4.586602e+01 4.280970e+00 1.876000e+00
    endloop
  endfacet
  facet normal 1.000000e+00 0.000000e+00 0.000000e+00
    outer loop
      vertex -4.586602e+01 -1.904926e+00 1.476000e+00
      vertex -4.586602e+01 4.280970e+00 1.876000e+00
      vertex -4.586602e+01 -1.904926e+00 1.876000e+00
    endloop
  endfacet
  facet normal 0.000000e+00 1.000000e+00 0.000000e+00
    outer loop
      vertex -4.413398e+01 -1.904926e+00 1.476000e+00
      vertex -4.586602e+01 -1.904926e+00 1.476000e+00
      vertex -4.586602e+01 -1.904926e+00 1.876000e+00
    endloop
  endfacet
  facet normal 0.000000e+00 1.000000e+00 0.000000e+00
    outer loop
      vertex -4.413398e+01 -1.904926e+00 1.476000e+00
      vertex -4.586602e+01 -1.904926e+00 1.876000e+00
      vertex -4.413398e+01 -1.904926e+00 1.876000e+00
    endloop
  endfacet
  facet normal -1.000000e+00 -0.000000e+00 -0.000000e+00
    outer loop
      vertex -4.413398e+01 4.280970e+00 1.476000e+00
      vertex -4.413398e+01 -1.904926e+00 1.476000e+00
      vertex -4.413398e+01 -1.904926e+00 1.876000e+00
    endloop
  endfacet
  facet normal -1.000000e+00 -0.000000e+00 -0.000000e+00
    outer loop
      vertex -4.413398e+01 4.280970e+00 1.476000e+00
      vertex -4.413398e+01 -1.904926e+00 1.876000e+00
      vertex -4.413398e+01 4.280970e+00 1.876000e+00
    endloop
  endfacet
  facet normal 0.000000e+00 -1.000000e+00 0.000000e+00
    outer loop
      vertex -4.586602e+01 4.280970e+00 1.476000e+00
      vertex -4.413398e+01 4.280970e+00 1.476000e+00
      vertex -4.413398e+01 4.280970e+00 1.876000e+00
    endloop
  endfacet
  facet normal 0.000000e+00 -1.000000e+00 0.000000e+00
    outer loop
      vertex -4.586602e+01 4.280970e+00 1.476000e+00
      vertex -4.413398e+01 4.280970e+00 1.876000e+00
      vertex -4.586602e+01 4.280970e+00 1.876000e+00
    endloop
  endfacet
  facet normal 1.000000e+00 0.000000e+00 0.000000e+00
    outer loop
      vertex 1.571800e+01 -4.039494e+01 1.476000e+00
      vertex 1.571800e+01 -3.420905e+01 1.476000e+00
      vertex 1.571800e+01 -3.420905e+01 1.876000e+00
    endloop
  endfacet
  facet normal 1.000000e+00 0.000000e+00 0.000000e+00
    outer loop
      vertex 1.571800e+01 -4.039494e+01 1.476000e+00
      vertex 1.571800e+01 -3.420905e+01 1.876000e+00
      vertex 1.571800e+01 -4.039494e+01 1.876000e+00
    endloop
  endfacet
  facet normal 0.000000e+00 1.000000e+00 0.000000e+00
    outer loop
      vertex 1.745005e+01 -4.039494e+01 1.476000e+00
      vertex 1.571800e+01 -4.039494e+01 1.476000e+00
      vertex 1.571800e+01 -4.039494e+01 1.876000e+00
    endloop
  endfacet
  facet normal 0.000000e+00 1.000000e+00 0.000000e+00
    outer loop
      vertex 1.745005e+01 -4.039494e+01 1.476000e+00
      vertex 1.571800e+01 -4.039494e+01 1.876000e+00
      vertex 1.745005e+01 -4.039494e+01 1.876000e+00
    endloop
  endfacet
  facet normal -1.000000e+00 -0.000000e+00 -0.000000e+00
    outer loop
      vertex 1.745005e+01 -3.420905e+01 1.476000e+00
      vertex 1.745005e+01 -4.039494e+01 1.476000e+00
      vertex 1.745005e+01 -4.039494e+01 1.876000e+00
    endloop
  endfacet
  facet normal -1.000000e+00 -0.000000e+00 -0.000000e+00
    outer loop
      vertex 1.745005e+01 -3.420905e+01 1.476000e+00
      vertex 1.745005e+01 -4.039494e+01 1.876000e+00
      vertex 1.745005e+01 -3.420905e+01 1.876000e+00
    endloop
  endfacet
  facet normal 0.000000e+00 -1.000000e+00 0.000000e+00
    outer loop
      vertex 1.571800e+01 -3.420905e+01 1.476000e+00
      vertex 1.745005e+01 -3.420905e+01 1.476000e+00
      vertex 1.745005e+01 -3.420905e+01 1.876000e+00
    endloop
  endfacet
  facet normal 0.000000e+00 -1.000000e+00 0.000000e+00
    outer loop
      vertex 1.571800e+01 -3.420905e+01 1.476000e+00
      vertex 1.745005e+01 -3.420905e+01 1.876000e+00
      vertex 1.571800e+01 -3.420905e+01 1.876000e+00
    endloop
  endfacet
  facet normal 1.000000e+00 0.000000e+00 0.000000e+00
    outer loop
      vertex 8.020000e+00 -9.602930e+00 1.476000e+00
      vertex 8.020000e+00 -3.417034e+00 1.476000e+00
      vertex 8.020000e+00 -3.417034e+00 1.876000e+00
    endloop
  endfacet
  facet normal 1.000000e+00 0.000000e+00 0.000000e+00
    outer loop
      vertex 8.020000e+00 -9.602930e+00 1.476000e+00
      vertex 8.020000e+00 -3.417034e+00 1.876000e+00
      vertex 8.020000e+00 -9.602930e+00 1.876000e+00
    endloop
  endfacet
  facet normal 0.000000e+00 1.000000e+00 0.000000e+00
    outer loop
      vertex 9.752050e+00 -9.602930e+00 1.476000e+00
      vertex 8.020000e+00 -9.602930e+00 1.476000e+00
      vertex 8.020000e+00 -9.602930e+00 1.876000e+00
    endloop
  endfacet
  facet normal 0.000000e+00 1.000000e+00 0.000000e+00
    outer loop
      vertex 9.752050e+00 -9.602930e+00 1.476000e+00
      vertex 8.020000e+00 -9.602930e+00 1.876000e+00
      vertex 9.752050e+00 -9.602930e+00 1.876000e+00
    endloop
  endfacet
  facet normal -1.000000e+00 -0.000000e+00 -0.000000e+00
    outer loop
      vertex 9.752050e+00 -3.417034e+00 1.476000e+00
      vertex 9.752050e+00 -9.602930e+00 1.476000e+00
      vertex 9.752050e+00 -9.602930e+00 1.876000e+00
    endloop
  endfacet
  facet normal -1.000000e+00 -0.000000e+00 -0.000000e+00
    outer loop
      vertex 9.752050e+00 -3.417034e+00 1.476000e+00
      vertex 9.752050e+00 -9.602930e+00 1.876000e+00
      vertex 9.752050e+00 -3.417034e+00 1.876000e+00
    endloop
  endfacet
  facet normal 0.000000e+00 -1.000000e+00 0.000000e+00
    outer loop
      vertex 8.020000e+00 -3.417034e+00 1.476000e+00
      vertex 9.752050e+00 -3.417034e+00 1.476000e+00
      vertex 9.752050e+00 -3.417034e+00 1.876000e+00
    endloop
  endfacet
  facet normal 0.000000e+00 -1.000000e+00 0.000000e+00
    outer loop
      vertex 8.020000e+00 -3.417034e+00 1.476000e+00
      vertex 9.752050e+00 -3.417034e+00 1.876000e+00
      vertex 8.020000e+00 -3.417034e+00 1.876000e+00
    endloop
  endfacet
  facet normal 1.000000e+00 0.000000e+00 0.000000e+00
    outer loop
      vertex 3.219961e-01 3.658509e+01 1.476000e+00
      vertex 3.219961e-01 4.277099e+01 1.476000e+00
      vertex 3.219961e-01 4.277099e+01 1.876000e+00
    endloop
  endfacet
  facet normal 1.000000e+00 0.000000e+00 0.000000e+00
    outer loop
      vertex 3.219961e-01 3.658509e+01 1.476000e+00
      vertex 3.219961e-01 4.277099e+01 1.876000e+00
      vertex 3.219961e-01 3.658509e+01 1.876000e+00
    endloop
  endfacet
  facet normal 0.000000e+00 1.000000e+00 0.000000e+00
    outer loop
      vertex 2.054047e+00 3.658509e+01 1.476000e+00
      vertex 3.219961e-01 3.658509e+01 1.476000e+00
      vertex 3.219961e-01 3.658509e+01 1.876000e+00
    endloop
  endfacet
  facet normal 0.000000e+00 1.000000e+00 0.000000e+00
    outer loop
      vertex 2.054047e+00 3.658509e+01 1.476000e+00
      vertex 3.219961e-01 3.658509e+01 1.876000e+00
      vertex 2.054047e+00 3.658509e+01 1.876000e+00
    endloop
  endfacet
  facet normal -1.000000e+00 -0.000000e+00 -0.000000e+00
    outer loop
      vertex 2.054047e+00 4.277099e+01 1.476000e+00
      vertex 2.054047e+00 3.658509e+01 1.476000e+00
      vertex 2.054047e+00 3.658509e+01 1.876000e+00
    endloop
  endfacet
  facet normal -1.000000e+00 -0.000000e+00 -0.000000e+00
    outer loop
      vertex 2.054047e+00 4.277099e+01 1.476000e+00
      vertex 2.054047e+00 3.658509e+01 1.876000e+00
      vertex 2.054047e+00 4.277099e+01 1.876000e+00
    endloop
  endfacet
  facet normal 0.000000e+00 -1.000000e+00 0.000000e+00
    outer loop
      vertex 3.219961e-01 4.277099e+01 1.476000e+00
      vertex 2.054047e+00 4.277099e+01 1.476000e+00
      vertex 2.054047e+00 4.277099e+01 1.876000e+00
    endloop
  endfacet
  facet normal 0.000000e+00 -1.000000e+00 0.000000e+00
    outer loop
      vertex 3.219961e-01 4.277099e+01 1.476000e+00
      vertex 2.054047e+00 4.277099e+01 1.876000e+00
      vertex 3.219961e-01 4.277099e+01 1.876000e+00
    endloop
  endfacet
  facet normal 1.000000e+00 0.000000e+00 0.000000e+00
    outer loop
      vertex 3.219961e-01 -2.499894e+01 1.476000e+00
      vertex 3.219961e-01 -1.881304e+01 1.476000e+00
      vertex 3.219961e-01 -1.881304e+01 1.876000e+00
    endloop
  endfacet
  facet normal 1.000000e+00 0.000000e+00 0.000000e+00
    outer loop
      vertex 3.219961e-01 -2.499894e+01 1.476000e+00
      vertex 3.219961e-01 -1.881304e+01 1.876000e+00
      vertex 3.219961e-01 -2.499894e+01 1.876000e+00
    endloop
  endfacet
  facet normal 0.000000e+00 1.000000e+00 0.000000e+00
    outer loop
      vertex 2.054047e+00 -2.499894e+01 1.476000e+00
      vertex 3.219961e-01 -2.499894e+01 1.476000e+00
      vertex 3.219961e-01 -2.499894e+01 1.876000e+00
    endloop
  endfacet
  facet normal 0.000000e+00 1.000000e+00 0.000000e+00
    outer loop
      vertex 2.054047e+00 -2.499894e+01 1.476000e+00
      vertex 3.219961e-01 -2.499894e+01 1.876000e+00
      vertex 2.054047e+00 -2.499894e+01 1.876000e+00
    endloop
  endfacet
  facet normal -1.000000e+00 -0.000000e+00 -0.000000e+00
    outer loop
      vertex 2.054047e+00 -1.881304e+01 1.476000e+00
      vertex 2.054047e+00 -2.499894e+01 1.476000e+00
      vertex 2.054047e+00 -2.499894e+01 1.876000e+00
    endloop
  endfacet
  facet normal -1.000000e+00 -0.000000e+00 -0.000000e+00
    outer loop
      vertex 2.054047e+00 -1.881304e+01 1.476000e+00
      vertex 2.054047e+00 -2.499894e+01 1.876000e+00
      vertex 2.054047e+00 -1.881304e+01 1.876000e+00
    endloop
  endfacet
  facet normal 0.000000e+00 -1.000000e+00 0.000000e+00
    outer loop
      vertex 3.219961e-01 -1.881304e+01 1.476000e+00
      vertex 2.054047e+00 -1.881304e+01 1.476000e+00
      vertex 2.054047e+00 -1.881304e+01 1.876000e+00
    endloop
  endfacet
  facet normal 0.000000e+00 -1.000000e+00 0.000000e+00
    outer loop
      vertex 3.219961e-01 -1.881304e+01 1.476000e+00
      vertex 2.054047e+00 -1.881304e+01 1.876000e+00
      vertex 3.219961e-01 -1.881304e+01 1.876000e+00
    endloop
  endfacet
  facet normal 1.000000e+00 0.000000e+00 0.000000e+00
    outer loop
      vertex -7.376008e+00 -1.730093e+01 1.476000e+00
      vertex -7.376008e+00 -1.111504e+01 1.476000e+00
      vertex -7.376008e+00 -1.111504e+01 1.876000e+00
    endloop
  endfacet
  facet normal 1.000000e+00 0.000000e+00 0.000000e+00
    outer loop
      vertex -7.376008e+00 -1.730093e+01 1.476000e+00
      vertex -7.376008e+00 -1.111504e+01 1.876000e+00
      vertex -7.376008e+00 -1.730093e+01 1.876000e+00
    endloop
  endfacet
  facet normal 0.000000e+00 1.000000e+00 0.000000e+00
    outer loop
      vertex -5.643957e+00 -1.730093e+01 1.476000e+00
      vertex -7.376008e+00 -1.730093e+01 1.476000e+00
      vertex -7.376008e+00 -1.730093e+01 1.876000e+00
    endloop
  endfacet
  facet normal 0.000000e+00 1.000000e+00 0.000000e+00
    outer loop
      vertex -5.643957e+00 -1.730093e+01 1.476000e+00
      vertex -7.376008e+00 -1.730093e+01 1.876000e+00
      vertex -5.643957e+00 -1.730093e+01 1.876000e+00
    endloop
  endfacet
  facet normal -1.000000e+00 -0.000000e+00 -0.000000e+00
    outer loop
      vertex -5.643957e+00 -1.111504e+01 1.476000e+00
      vertex -5.643957e+00 -1.730093e+01 1.476000e+00
      vertex -5.643957e+00 -1.730093e+01 1.876000e+00
    endloop
  endfacet
  facet normal -1.000000e+00 -0.000000e+00 -0.000000e+00
    outer loop
      vertex -5.643957e+00 -1.111504e+01 1.476000e+00
      vertex -5.643957e+00 -1.730093e+01 1.876000e+00
      vertex -5.643957e+00 -1.111504e+01 1.876000e+00
    endloop
  endfacet
  facet normal 0.000000e+00 -1.000000e+00 0.000000e+00
    outer loop
      vertex -7.376008e+00 -1.111504e+01 1.476000e+00
      vertex -5.643957e+00 -1.111504e+01 1.476000e+00
      vertex -5.643957e+00 -1.111504e+01 1.876000e+00
    endloop
  endfacet
  facet normal 0.000000e+00 -1.000000e+00 0.000000e+00
    outer loop
      vertex -7.376008e+00 -1.111504e+01 1.476000e+00
      vertex -5.643957e+00 -1.111504e+01 1.876000e+00
      vertex -7.376008e+00 -1.111504e+01 1.876000e+00
    endloop
  endfacet
  facet normal 1.000000e+00 0.000000e+00 0.000000e+00
    outer loop
      vertex -1.507401e+01 2.888709e+01 1.476000e+00
      vertex -1.507401e+01 3.507298e+01 1.476000e+00
      vertex -1.507401e+01 3.507298e+01 1.876000e+00
    endloop
  endfacet
  facet normal 1.000000e+00 0.000000e+00 0.000000e+00
    outer loop
      vertex -1.507401e+01 2.888709e+01 1.476000e+00
      vertex -1.507401e+01 3.507298e+01 1.876000e+00
      vertex -1.507401e+01 2.888709e+01 1.876000e+00
    endloop
  endfacet
  facet normal 0.000000e+00 1.000000e+00 0.000000e+00
    outer loop
      vertex -1.334196e+01 2.888709e+01 1.476000e+00
      vertex -1.507401e+01 2.888709e+01 1.476000e+00
      vertex -1.507401e+01 2.888709e+01 1.876000e+00
    endloop
  endfacet
  facet normal 0.000000e+00 1.000000e+00 0.000000e+00
    outer loop
      vertex -1.334196e+01 2.888709e+01 1.476000e+00
      vertex -1.507401e+01 2.888709e+01 1.876000e+00
      vertex -1.334196e+01 2.888709e+01 1.876000e+00
    endloop
  endfacet
  facet normal -1.000000e+00 -0.000000e+00 -0.000000e+00
    outer loop
      vertex -1.334196e+01 3.507298e+01 1.476000e+00
      vertex -1.334196e+01 2.888709e+01 1.476000e+00
      vertex -1.334196e+01 2.888709e+01 1.876000e+00
    endloop
  endfacet
  facet normal -1.000000e+00 -0.000000e+00 -0.000000e+00
    outer loop
      vertex -1.334196e+01 3.507298e+01 1.476000e+00
      vertex -1.334196e+01 2.888709e+01 1.876000e+00
      vertex -1.334196e+01 3.507298e+01 1.876000e+00
    endloop
  endfacet
  facet normal 0.000000e+00 -1.000000e+00 0.000000e+00
    outer loop
      vertex -1.507401e+01 3.507298e+01 1.476000e+00
      vertex -1.334196e+01 3.507298e+01 1.476000e+00
      vertex -1.334196e+01 3.507298e+01 1.876000e+00
    endloop
  endfacet
  facet normal 0.000000e+00 -1.000000e+00 0.000000e+00
    outer loop
      vertex -1.507401e+01 3.507298e+01 1.476000e+00
      vertex -1.334196e+01 3.507298e+01 1.876000e+00
      vertex -1.507401e+01 3.507298e+01 1.876000e+00
    endloop
  endfacet
  facet normal 1.000000e+00 0.000000e+00 0.000000e+00
    outer loop
      vertex -1.507401e+01 -3.269694e+01 1.476000e+00
      vertex -1.507401e+01 -2.651105e+01 1.476000e+00
      vertex -1.507401e+01 -2.651105e+01 1.876000e+00
    endloop
  endfacet
  facet normal 1.000000e+00 0.000000e+00 0.000000e+00
    outer loop
      vertex -1.507401e+01 -3.269694e+01 1.476000e+00
      vertex -1.507401e+01 -2.651105e+01 1.876000e+00
      vertex -1.507401e+01 -3.269694e+01 1.876000e+00
    endloop
  endfacet
  facet normal 0.000000e+00 1.000000e+00 0.000000e+00
    outer loop
      vertex -1.334196e+01 -3.269694e+01 1.476000e+00
      vertex -1.507401e+01 -3.269694e+01 1.476000e+00
      vertex -1.507401e+01 -3.269694e+01 1.876000e+00
    endloop
  endfacet
  facet normal 0.000000e+00 1.000000e+00 0.000000e+00
    outer loop
      vertex -1.334196e+01 -3.269694e+01 1.476000e+00
      vertex -1.507401e+01 -3.269694e+01 1.876000e+00
      vertex -1.334196e+01 -3.269694e+01 1.876000e+00
    endloop
  endfacet
  facet normal -1.000000e+00 -0.000000e+00 -0.000000e+00
    outer loop
      vertex -1.334196e+01 -2.651105e+01 1.476000e+00
      vertex -1.334196e+01 -3.269694e+01 1.476000e+00
      vertex -1.334196e+01 -3.269694e+01 1.876000e+00
    endloop
  endfacet
  facet normal -1.000000e+00 -0.000000e+00 -0.000000e+00
    outer loop
      vertex -1.334196e+01 -2.651105e+01 1.476000e+00
      vertex -1.334196e+01 -3.269694e+01 1.876000e+00
      vertex -1.334196e+01 -2.651105e+01 1.876000e+00
    endloop
  endfacet
  facet normal 0.000000e+00 -1.000000e+00 0.000000e+00
    outer loop
      vertex -1.507401e+01 -2.651105e+01 1.476000e+00
      vertex -1.334196e+01 -2.651105e+01 1.476000e+00
      vertex -1.334196e+01 -2.651105e+01 1.876000e+00
    endloop
  endfacet
  facet normal 0.000000e+00 -1.000000e+00 0.000000e+00
    outer loop
      vertex -1.507401e+01 -2.651105e+01 1.476000e+00
      vertex -1.334196e+01 -2.651105e+01 1.876000e+00
      vertex -1.507401e+01 -2.651105e+01 1.876000e+00
    endloop
  endfacet
  facet normal 1.000000e+00 0.000000e+00 0.000000e+00
    outer loop
      vertex -2.277201e+01 -2.499894e+01 1.476000e+00
      vertex -2.277201e+01 -1.881304e+01 1.476000e+00
      vertex -2.277201e+01 -1.881304e+01 1.876000e+00
    endloop
  endfacet
  facet normal 1.000000e+00 0.000000e+00 0.000000e+00
    outer loop
      vertex -2.277201e+01 -2.499894e+01 1.476000e+00
      vertex -2.277201e+01 -1.881304e+01 1.876000e+00
      vertex -2.277201e+01 -2.499894e+01 1.876000e+00
    endloop
  endfacet
  facet normal 0.000000e+00 1.000000e+00 0.000000e+00
    outer loop
      vertex -2.103996e+01 -2.499894e+01 1.476000e+00
      vertex -2.277201e+01 -2.499894e+01 1.476000e+00
      vertex -2.277201e+01 -2.499894e+01 1.876000e+00
    endloop
  endfacet
  facet normal 0.000000e+00 1.000000e+00 0.000000e+00
    outer loop
      vertex -2.103996e+01 -2.499894e+01 1.476000e+00
      vertex -2.277201e+01 -2.499894e+01 1.876000e+00
      vertex -2.103996e+01 -2.499894e+01 1.876000e+00
    endloop
  endfacet
  facet normal -1.000000e+00 -0.000000e+00 -0.000000e+00
    outer loop
      vertex -2.103996e+01 -1.881304e+01 1.476000e+00
      vertex -2.103996e+01 -2.499894e+01 1.476000e+00
      vertex -2.103996e+01 -2.499894e+01 1.876000e+00
    endloop
  endfacet
  facet normal -1.000000e+00 -0.000000e+00 -0.000000e+00
    outer loop
      vertex -2.103996e+01 -1.881304e+01 1.476000e+00
      vertex -2.103996e+01 -2.499894e+01 1.876000e+00
      vertex -2.103996e+01 -1.881304e+01 1.876000e+00
    endloop
  endfacet
  facet normal 0.000000e+00 -1.000000e+00 0.000000e+00
    outer loop
      vertex -2.277201e+01 -1.881304e+01 1.476000e+00
      vertex -2.103996e+01 -1.881304e+01 1.476000e+00
      vertex -2.103996e+01 -1.881304e+01 1.876000e+00
    endloop
  endfacet
  facet normal 0.000000e+00 -1.000000e+00 0.000000e+00
    outer loop
      vertex -2.277201e+01 -1.881304e+01 1.476000e+00
      vertex -2.103996e+01 -1.881304e+01 1.876000e+00
      vertex -2.277201e+01 -1.881304e+01 1.876000e+00
    endloop
  endfacet
  facet normal 1.000000e+00 0.000000e+00 0.000000e+00
    outer loop
      vertex -3.047002e+01 1.349108e+01 1.476000e+00
      vertex -3.047002e+01 1.967698e+01 1.476000e+00
      vertex -3.047002e+01 1.967698e+01 1.876000e+00
    endloop
  endfacet
  facet normal 1.000000e+00 0.000000e+00 0.000000e+00
    outer loop
      vertex -3.047002e+01 1.349108e+01 1.476000e+00
      vertex -3.047002e+01 1.967698e+01 1.876000e+00
      vertex -3.047002e+01 1.349108e+01 1.876000e+00
    endloop
  endfacet
  facet normal 0.000000e+00 1.000000e+00 0.000000e+00
    outer loop
      vertex -2.873797e+01 1.349108e+01 1.476000e+00
      vertex -3.047002e+01 1.349108e+01 1.476000e+00
      vertex -3.047002e+01 1.349108e+01 1.876000e+00
    endloop
  endfacet
  facet normal 0.000000e+00 1.000000e+00 0.000000e+00
    outer loop
      vertex -2.873797e+01 1.349108e+01 1.476000e+00
      vertex -3.047002e+01 1.349108e+01 1.876000e+00
      vertex -2.873797e+01 1.349108e+01 1.876000e+00
    endloop
  endfacet
  facet normal -1.000000e+00 -0.000000e+00 -0.000000e+00
    outer loop
      vertex -2.873797e+01 1.967698e+01 1.476000e+00
      vertex -2.873797e+01 1.349108e+01 1.476000e+00
      vertex -2.873797e+01 1.349108e+01 1.876000e+00
    endloop
  endfacet
  facet normal -1.000000e+00 -0.000000e+00 -0.000000e+00
    outer loop
      vertex -2.873797e+01 1.967698e+01 1.476000e+00
      vertex -2.873797e+01 1.349108e+01 1.876000e+00
      vertex -2.873797e+01 1.967698e+01 1.876000e+00
    endloop
  endfacet
  facet normal 0.000000e+00 -1.000000e+00 0.000000e+00
    outer loop
      vertex -3.047002e+01 1.967698e+01 1.476000e+00
      vertex -2.873797e+01 1.967698e+01 1.476000e+00
      vertex -2.873797e+01 1.967698e+01 1.876000e+00
    endloop
  endfacet
  facet normal 0.000000e+00 -1.000000e+00 0.000000e+00
    outer loop
      vertex -3.047002e+01 1.967698e+01 1.476000e+00
      vertex -2.873797e+01 1.967698e+01 1.876000e+00
      vertex -3.047002e+01 1.967698e+01 1.876000e+00
    endloop
  endfacet
  facet normal 1.000000e+00 0.000000e+00 0.000000e+00
    outer loop
      vertex -3.047002e+01 -1.730093e+01 1.476000e+00
      vertex -3.047002e+01 -1.111504e+01 1.476000e+00
      vertex -3.047002e+01 -1.111504e+01 1.876000e+00
    endloop
  endfacet
  facet normal 1.000000e+00 0.000000e+00 0.000000e+00
    outer loop
      vertex -3.047002e+01 -1.730093e+01 1.476000e+00
      vertex -3.047002e+01 -1.111504e+01 1.876000e+00
      vertex -3.047002e+01 -1.730093e+01 1.876000e+00
    endloop
  endfacet
  facet normal 0.000000e+00 1.000000e+00 0.000000e+00
    outer loop
      vertex -2.873797e+01 -1.730093e+01 1.476000e+00
      vertex -3.047002e+01 -1.730093e+01 1.476000e+00
      vertex -3.047002e+01 -1.730093e+01 1.876000e+00
    endloop
  endfacet
  facet normal 0.000000e+00 1.000000e+00 0.000000e+00
    outer loop
      vertex -2.873797e+01 -1.730093e+01 1.476000e+00
      vertex -3.047002e+01 -1.730093e+01 1.876000e+00
      vertex -2.873797e+01 -1.730093e+01 1.876000e+00
    endloop
  endfacet
  facet normal -1.000000e+00 -0.000000e+00 -0.000000e+00
    outer loop
      vertex -2.873797e+01 -1.111504e+01 1.476000e+00
      vertex -2.873797e+01 -1.730093e+01 1.476000e+00
      vertex -2.873797e+01 -1.730093e+01 1.876000e+00
    endloop
  endfacet
  facet normal -1.000000e+00 -0.000000e+00 -0.000000e+00
    outer loop
      vertex -2.873797e+01 -1.111504e+01 1.476000e+00
      vertex -2.873797e+01 -1.730093e+01 1.876000e+00
      vertex -2.873797e+01 -1.111504e+01 1.876000e+00
    endloop
  endfacet
  facet normal 0.000000e+00 -1.000000e+00 0.000000e+00
    outer loop
      vertex -3.047002e+01 -1.111504e+01 1.476000e+00
      vertex -2.873797e+01 -1.111504e+01 1.476000e+00
      vertex -2.873797e+01 -1.111504e+01 1.876000e+00
    endloop
  endfacet
  facet normal 0.000000e+00 -1.000000e+00 0.000000e+00
    outer loop
      vertex -3.047002e+01 -1.111504e+01 1.476000e+00
      vertex -2.873797e+01 -1.111504e+01 1.876000e+00
      vertex -3.047002e+01 -1.111504e+01 1.876000e+00
    endloop
  endfacet
  facet normal 1.000000e+00 0.000000e+00 0.000000e+00
    outer loop
      vertex -4.586602e+01 -4.809295e+01 1.476000e+00
      vertex -4.586602e+01 -4.190705e+01 1.476000e+00
      vertex -4.586602e+01 -4.190705e+01 1.876000e+00
    endloop
  endfacet
  facet normal 1.000000e+00 0.000000e+00 0.000000e+00
    outer loop
      vertex -4.586602e+01 -4.809295e+01 1.476000e+00
      vertex -4.586602e+01 -4.190705e+01 1.876000e+00
      vertex -4.586602e+01 -4.809295e+01 1.876000e+00
    endloop
  endfacet
  facet normal 0.000000e+00 1.000000e+00 0.000000e+00
    outer loop
      vertex -4.413398e+01 -4.809295e+01 1.476000e+00
      vertex -4.586602e+01 -4.809295e+01 1.476000e+00
      vertex -4.586602e+01 -4.809295e+01 1.876000e+00
    endloop
  endfacet
  facet normal 0.000000e+00 1.000000e+00 0.000000e+00
    outer loop
      vertex -4.413398e+01 -4.809295e+01 1.476000e+00
      vertex -4.586602e+01 -4.809295e+01 1.876000e+00
      vertex -4.413398e+01 -4.809295e+01 1.876000e+00
    endloop
  endfacet
  facet normal -1.000000e+00 -0.000000e+00 -0.000000e+00
    outer loop
      vertex -4.413398e+01 -4.190705e+01 1.476000e+00
      vertex -4.413398e+01 -4.809295e+01 1.476000e+00
      vertex -4.413398e+01 -4.809295e+01 1.876000e+00
    endloop
  endfacet
  facet normal -1.000000e+00 -0.000000e+00 -0.000000e+00
    outer loop
      vertex -4.413398e+01 -4.190705e+01 1.476000e+00
      vertex -4.413398e+01 -4.809295e+01 1.876000e+00
      vertex -4.413398e+01 -4.190705e+01 1.876000e+00
    endloop
  endfacet
  facet normal 0.000000e+00 -1.000000e+00 0.000000e+00
    outer loop
      vertex -4.586602e+01 -4.190705e+01 1.476000e+00
      vertex -4.413398e+01 -4.190705e+01 1.476000e+00
      vertex -4.413398e+01 -4.190705e+01 1.876000e+00
    endloop
  endfacet
  facet normal 0.000000e+00 -1.000000e+00 0.000000e+00
    outer loop
      vertex -4.586602e+01 -4.190705e+01 1.476000e+00
      vertex -4.413398e+01 -4.190705e+01 1.876000e+00
      vertex -4.586602e+01 -4.190705e+01 1.876000e+00
    endloop
  endfacet
  facet normal 1.000000e+00 0.000000e+00 0.000000e+00
    outer loop
      vertex -3.047002e+01 -4.039494e+01 1.476000e+00
      vertex -3.047002e+01 -3.420905e+01 1.476000e+00
      vertex -3.047002e+01 -3.420905e+01 1.876000e+00
    endloop
  endfacet
  facet normal 1.000000e+00 0.000000e+00 0.000000e+00
    outer loop
      vertex -3.047002e+01 -4.039494e+01 1.476000e+00
      vertex -3.047002e+01 -3.420905e+01 1.876000e+00
      vertex -3.047002e+01 -4.039494e+01 1.876000e+00
    endloop
  endfacet
  facet normal 0.000000e+00 1.000000e+00 0.000000e+00
    outer loop
      vertex -2.873797e+01 -4.039494e+01 1.476000e+00
      vertex -3.047002e+01 -4.039494e+01 1.476000e+00
      vertex -3.047002e+01 -4.039494e+01 1.876000e+00
    endloop
  endfacet
  facet normal 0.000000e+00 1.000000e+00 0.000000e+00
    outer loop
      vertex -2.873797e+01 -4.039494e+01 1.476000e+00
      vertex -3.047002e+01 -4.039494e+01 1.876000e+00
      vertex -2.873797e+01 -4.039494e+01 1.876000e+00
    endloop
  endfacet
  facet normal -1.000000e+00 -0.000000e+00 -0.000000e+00
    outer loop
      vertex -2.873797e+01 -3.420905e+01 1.476000e+00
      vertex -2.873797e+01 -4.039494e+01 1.476000e+00
      vertex -2.873797e+01 -4.039494e+01 1.876000e+00
    endloop
  endfacet
  facet normal -1.000000e+00 -0.000000e+00 -0.000000e+00
    outer loop
      vertex -2.873797e+01 -3.420905e+01 1.476000e+00
      vertex -2.873797e+01 -4.039494e+01 1.876000e+00
      vertex -2.873797e+01 -3.420905e+01 1.876000e+00
    endloop
  endfacet
  facet normal 0.000000e+00 -1.000000e+00 0.000000e+00
    outer loop
      vertex -3.047002e+01 -3.420905e+01 1.476000e+00
      vertex -2.873797e+01 -3.420905e+01 1.476000e+00
      vertex -2.873797e+01 -3.420905e+01 1.876000e+00
    endloop
  endfacet
  facet normal 0.000000e+00 -1.000000e+00 0.000000e+00
    outer loop
      vertex -3.047002e+01 -3.420905e+01 1.476000e+00
      vertex -2.873797e+01 -3.420905e+01 1.876000e+00
      vertex -3.047002e+01 -3.420905e+01 1.876000e+00
    endloop
  endfacet
  facet normal 1.000000e+00 0.000000e+00 0.000000e+00
    outer loop
      vertex -3.047002e+01 5.793077e+00 1.476000e+00
      vertex -3.047002e+01 1.197897e+01 1.476000e+00
      vertex -3.047002e+01 1.197897e+01 1.876000e+00
    endloop
  endfacet
  facet normal 1.000000e+00 0.000000e+00 0.000000e+00
    outer loop
      vertex -3.047002e+01 5.793077e+00 1.476000e+00
      vertex -3.047002e+01 1.197897e+01 1.876000e+00
      vertex -3.047002e+01 5.793077e+00 1.876000e+00
    endloop
  endfacet
  facet normal 0.000000e+00 1.000000e+00 0.000000e+00
    outer loop
      vertex -2.873797e+01 5.793077e+00 1.476000e+00
      vertex -3.047002e+01 5.793077e+00 1.476000e+00
      vertex -3.047002e+01 5.793077e+00 1.876000e+00
    endloop
  endfacet
  facet normal 0.000000e+00 1.000000e+00 0.000000e+00
    outer loop
      vertex -2.873797e+01 5.793077e+00 1.476000e+00
      vertex -3.047002e+01 5.793077e+00 1.876000e+00
      vertex -2.873797e+01 5.793077e+00 1.876000e+00
    endloop
  endfacet
  facet normal -1.000000e+00 -0.000000e+00 -0.000000e+00
    outer loop
      vertex -2.873797e+01 1.197897e+01 1.476000e+00
      vertex -2.873797e+01 5.793077e+00 1.476000e+00
      vertex -2.873797e+01 5.793077e+00 1.876000e+00
    endloop
  endfacet
  facet normal -1.000000e+00 -0.000000e+00 -0.000000e+00
    outer loop
      vertex -2.873797e+01 1.197897e+01 1.476000e+00
      vertex -2.873797e+01 5.793077e+00 1.876000e+00
      vertex -2.873797e+01 1.197897e+01 1.876000e+00
    endloop
  endfacet
  facet normal 0.000000e+00 -1.000000e+00 0.000000e+00
    outer loop
      vertex -3.047002e+01 1.197897e+01 1.476000e+00
      vertex -2.873797e+01 1.197897e+01 1.476000e+00
      vertex -2.873797e+01 1.197897e+01 1.876000e+00
    endloop
  endfacet
  facet normal 0.000000e+00 -1.000000e+00 0.000000e+00
    outer loop
      vertex -3.047002e+01 1.197897e+01 1.476000e+00
      vertex -2.873797e+01 1.197897e+01 1.876000e+00
      vertex -3.047002e+01 1.197897e+01 1.876000e+00
    endloop
  endfacet
  facet normal 1.000000e+00 0.000000e+00 0.000000e+00
    outer loop
      vertex -4.586602e+01 -2.499894e+01 1.476000e+00
      vertex -4.586602e+01 -1.881304e+01 1.476000e+00
      vertex -4.586602e+01 -1.881304e+01 1.876000e+00
    endloop
  endfacet
  facet normal 1.000000e+00 0.000000e+00 0.000000e+00
    outer loop
      vertex -4.586602e+01 -2.499894e+01 1.476000e+00
      vertex -4.586602e+01 -1.881304e+01 1.876000e+00
      vertex -4.586602e+01 -2.499894e+01 1.876000e+00
    endloop
  endfacet
  facet normal 0.000000e+00 1.000000e+00 0.000000e+00
    outer loop
      vertex -4.413398e+01 -2.499894e+01 1.476000e+00
      vertex -4.586602e+01 -2.499894e+01 1.476000e+00
      vertex -4.586602e+01 -2.499894e+01 1.876000e+00
    endloop
  endfacet
  facet normal 0.000000e+00 1.000000e+00 0.000000e+00
    outer loop
      vertex -4.413398e+01 -2.499894e+01 1.476000e+00
      vertex -4.586602e+01 -2.499894e+01 1.876000e+00
      vertex -4.413398e+01 -2.499894e+01 1.876000e+00
    endloop
  endfacet
  facet normal -1.000000e+00 -0.000000e+00 -0.000000e+00
    outer loop
      vertex -4.413398e+01 -1.881304e+01 1.476000e+00
      vertex -4.413398e+01 -2.499894e+01 1.476000e+00
      vertex -4.413398e+01 -2.499894e+01 1.876000e+00
    endloop
  endfacet
  facet normal -1.000000e+00 -0.000000e+00 -0.000000e+00
    outer loop
      vertex -4.413398e+01 -1.881304e+01 1.476000e+00
      vertex -4.413398e+01 -2.499894e+01 1.876000e+00
      vertex -4.413398e+01 -1.881304e+01 1.876000e+00
    endloop
  endfacet
  facet normal 0.000000e+00 -1.000000e+00 0.000000e+00
    outer loop
      vertex -4.586602e+01 -1.881304e+01 1.476000e+00
      vertex -4.413398e+01 -1.881304e+01 1.476000e+00
      vertex -4.413398e+01 -1.881304e+01 1.876000e+00
    endloop
  endfacet
  facet normal 0.000000e+00 -1.000000e+00 0.000000e+00
    outer loop
      vertex -4.586602e+01 -1.881304e+01 1.476000e+00
      vertex -4.413398e+01 -1.881304e+01 1.876000e+00
      vertex -4.586602e+01 -1.881304e+01 1.876000e+00
    endloop
  endfacet
  facet normal 1.000000e+00 0.000000e+00 0.000000e+00
    outer loop
      vertex -1.507401e+01 -4.809295e+01 1.476000e+00
      vertex -1.507401e+01 -4.190705e+01 1.476000e+00
      vertex -1.507401e+01 -4.190705e+01 1.876000e+00
    endloop
  endfacet
  facet normal 1.000000e+00 0.000000e+00 0.000000e+00
    outer loop
      vertex -1.507401e+01 -4.809295e+01 1.476000e+00
      vertex -1.507401e+01 -4.190705e+01 1.876000e+00
      vertex -1.507401e+01 -4.809295e+01 1.876000e+00
    endloop
  endfacet
  facet normal 0.000000e+00 1.000000e+00 0.000000e+00
    outer loop
      vertex -1.334196e+01 -4.809295e+01 1.476000e+00
      vertex -1.507401e+01 -4.809295e+01 1.476000e+00
      vertex -1.507401e+01 -4.809295e+01 1.876000e+00
    endloop
  endfacet
  facet normal 0.000000e+00 1.000000e+00 0.000000e+00
    outer loop
      vertex -1.334196e+01 -4.809295e+01 1.476000e+00
      vertex -1.507401e+01 -4.809295e+01 1.876000e+00
      vertex -1.334196e+01 -4.809295e+01 1.876000e+00
    endloop
  endfacet
  facet normal -1.000000e+00 -0.000000e+00 -0.000000e+00
    outer loop
      vertex -1.334196e+01 -4.190705e+01 1.476000e+00
      vertex -1.334196e+01 -4.809295e+01 1.476000e+00
      vertex -1.334196e+01 -4.809295e+01 1.876000e+00
    endloop
  endfacet
  facet normal -1.000000e+00 -0.000000e+00 -0.000000e+00
    outer loop
      vertex -1.334196e+01 -4.190705e+01 1.476000e+00
      vertex -1.334196e+01 -4.809295e+01 1.876000e+00
      vertex -1.334196e+01 -4.190705e+01 1.876000e+00
    endloop
  endfacet
  facet normal 0.000000e+00 -1.000000e+00 0.000000e+00
    outer loop
      vertex -1.507401e+01 -4.190705e+01 1.476000e+00
      vertex -1.334196e+01 -4.190705e+01 1.476000e+00
      vertex -1.334196e+01 -4.190705e+01 1.876000e+00
    endloop
  endfacet
  facet normal 0.000000e+00 -1.000000e+00 0.000000e+00
    outer loop
      vertex -1.507401e+01 -4.190705e+01 1.476000e+00
      vertex -1.334196e+01 -4.190705e+01 1.876000e+00
      vertex -1.507401e+01 -4.190705e+01 1.876000e+00
    endloop
  endfacet
  facet normal 1.000000e+00 0.000000e+00 0.000000e+00
    outer loop
      vertex -1.507401e+01 5.793077e+00 1.476000e+00
      vertex -1.507401e+01 1.197897e+01 1.476000e+00
      vertex -1.507401e+01 1.197897e+01 1.876000e+00
    endloop
  endfacet
  facet normal 1.000000e+00 0.000000e+00 0.000000e+00
    outer loop
      vertex -1.507401e+01 5.793077e+00 1.476000e+00
      vertex -1.507401e+01 1.197897e+01 1.876000e+00
      vertex -1.507401e+01 5.793077e+00 1.876000e+00
    endloop
  endfacet
  facet normal 0.000000e+00 1.000000e+00 0.000000e+00
    outer loop
      vertex -1.334196e+01 5.793077e+00 1.476000e+00
      vertex -1.507401e+01 5.793077e+00 1.476000e+00
      vertex -1.507401e+01 5.793077e+00 1.876000e+00
    endloop
  endfacet
  facet normal 0.000000e+00 1.000000e+00 0.000000e+00
    outer loop
      vertex -1.334196e+01 5.793077e+00 1.476000e+00
      vertex -1.507401e+01 5.793077e+00 1.876000e+00
      vertex -1.334196e+01 5.793077e+00 1.876000e+00
    endloop
  endfacet
  facet normal -1.000000e+00 -0.000000e+00 -0.000000e+00
    outer loop
      vertex -1.334196e+01 1.197897e+01 1.476000e+00
      vertex -1.334196e+01 5.793077e+00 1.476000e+00
      vertex -1.334196e+01 5.793077e+00 1.876000e+00
    endloop
  endfacet
  facet normal -1.000000e+00 -0.000000e+00 -0.000000e+00
    outer loop
      vertex -1.334196e+01 1.197897e+01 1.476000e+00
      vertex -1.334196e+01 5.793077e+00 1.876000e+00
      vertex -1.334196e+01 1.197897e+01 1.876000e+00
    endloop
  endfacet
  facet normal 0.000000e+00 -1.000000e+00 0.000000e+00
    outer loop
      vertex -1.507401e+01 1.197897e+01 1.476000e+00
      vertex -1.334196e+01 1.197897e+01 1.476000e+00
      vertex -1.334196e+01 1.197897e+01 1.876000e+00
    endloop
  endfacet
  facet normal 0.000000e+00 -1.000000e+00 0.000000e+00
    outer loop
      vertex -1.507401e+01 1.197897e+01 1.476000e+00
      vertex -1.334196e+01 1.197897e+01 1.876000e+00
      vertex -1.507401e+01 1.197897e+01 1.876000e+00
    endloop
  endfacet
  facet normal 1.000000e+00 0.000000e+00 0.000000e+00
    outer loop
      vertex -7.376008e+00 -3.269694e+01 1.476000e+00
      vertex -7.376008e+00 -2.651105e+01 1.476000e+00
      vertex -7.376008e+00 -2.651105e+01 1.876000e+00
    endloop
  endfacet
  facet normal 1.000000e+00 0.000000e+00 0.000000e+00
    outer loop
      vertex -7.376008e+00 -3.269694e+01 1.476000e+00
      vertex -7.376008e+00 -2.651105e+01 1.876000e+00
      vertex -7.376008e+00 -3.269694e+01 1.876000e+00
    endloop
  endfacet
  facet normal 0.000000e+00 1.000000e+00 0.000000e+00
    outer loop
      vertex -5.643957e+00 -3.269694e+01 1.476000e+00
      vertex -7.376008e+00 -3.269694e+01 1.476000e+00
      vertex -7.376008e+00 -3.269694e+01 1.876000e+00
    endloop
  endfacet
  facet normal 0.000000e+00 1.000000e+00 0.000000e+00
    outer loop
      vertex -5.643957e+00 -3.269694e+01 1.476000e+00
      vertex -7.376008e+00 -3.269694e+01 1.876000e+00
      vertex -5.643957e+00 -3.269694e+01 1.876000e+00
    endloop
  endfacet
  facet normal -1.000000e+00 -0.000000e+00 -0.000000e+00
    outer loop
      vertex -5.643957e+00 -2.651105e+01 1.476000e+00
      vertex -5.643957e+00 -3.269694e+01 1.476000e+00
      vertex -5.643957e+00 -3.269694e+01 1.876000e+00
    endloop
  endfacet
  facet normal -1.000000e+00 -0.000000e+00 -0.000000e+00
    outer loop
      vertex -5.643957e+00 -2.651105e+01 1.476000e+00
      vertex -5.643957e+00 -3.269694e+01 1.876000e+00
      vertex -5.643957e+00 -2.651105e+01 1.876000e+00
    endloop
  endfacet
  facet normal 0.000000e+00 -1.000000e+00 0.000000e+00
    outer loop
      vertex -7.376008e+00 -2.651105e+01 1.476000e+00
      vertex -5.643957e+00 -2.651105e+01 1.476000e+00
      vertex -5.643957e+00 -2.651105e+01 1.876000e+00
    endloop
  endfacet
  facet normal 0.000000e+00 -1.000000e+00 0.000000e+00
    outer loop
      vertex -7.376008e+00 -2.651105e+01 1.476000e+00
      vertex -5.643957e+00 -2.651105e+01 1.876000e+00
      vertex -7.376008e+00 -2.651105e+01 1.876000e+00
    endloop
  endfacet
  facet normal 1.000000e+00 0.000000e+00 0.000000e+00
    outer loop
      vertex 3.219961e-01 -4.039494e+01 1.476000e+00
      vertex 3.219961e-01 -3.420905e+01 1.476000e+00
      vertex 3.219961e-01 -3.420905e+01 1.876000e+00
    endloop
  endfacet
  facet normal 1.000000e+00 0.000000e+00 0.000000e+00
    outer loop
      vertex 3.219961e-01 -4.039494e+01 1.476000e+00
      vertex 3.219961e-01 -3.420905e+01 1.876000e+00
      vertex 3.219961e-01 -4.039494e+01 1.876000e+00
    endloop
  endfacet
  facet normal 0.000000e+00 1.000000e+00 0.000000e+00
    outer loop
      vertex 2.054047e+00 -4.039494e+01 1.476000e+00
      vertex 3.219961e-01 -4.039494e+01 1.476000e+00
      vertex 3.219961e-01 -4.039494e+01 1.876000e+00
    endloop
  endfacet
  facet normal 0.000000e+00 1.000000e+00 0.000000e+00
    outer loop
      vertex 2.054047e+00 -4.039494e+01 1.476000e+00
      vertex 3.219961e-01 -4.039494e+01 1.876000e+00
      vertex 2.054047e+00 -4.039494e+01 1.876000e+00
    endloop
  endfacet
  facet normal -1.000000e+00 -0.000000e+00 -0.000000e+00
    outer loop
      vertex 2.054047e+00 -3.420905e+01 1.476000e+00
      vertex 2.054047e+00 -4.039494e+01 1.476000e+00
      vertex 2.054047e+00 -4.039494e+01 1.876000e+00
    endloop
  endfacet
  facet normal -1.000000e+00 -0.000000e+00 -0.000000e+00
    outer loop
      vertex 2.054047e+00 -3.420905e+01 1.476000e+00
      vertex 2.054047e+00 -4.039494e+01 1.876000e+00
      vertex 2.054047e+00 -3.420905e+01 1.876000e+00
    endloop
  endfacet
  facet normal 0.000000e+00 -1.000000e+00 0.000000e+00
    outer loop
      vertex 3.219961e-01 -3.420905e+01 1.476000e+00
      vertex 2.054047e+00 -3.420905e+01 1.476000e+00
      vertex 2.054047e+00 -3.420905e+01 1.876000e+00
    endloop
  endfacet
  facet normal 0.000000e+00 -1.000000e+00 0.000000e+00
    outer loop
      vertex 3.219961e-01 -3.420905e+01 1.476000e+00
      vertex 2.054047e+00 -3.420905e+01 1.876000e+00
      vertex 3.219961e-01 -3.420905e+01 1.876000e+00
    endloop
  endfacet
  facet normal 1.000000e+00 0.000000e+00 0.000000e+00
    outer loop
      vertex 3.219961e-01 2.118908e+01 1.476000e+00
      vertex 3.219961e-01 2.737498e+01 1.476000e+00
      vertex 3.219961e-01 2.737498e+01 1.876000e+00
    endloop
  endfacet
  facet normal 1.000000e+00 0.000000e+00 0.000000e+00
    outer loop
      vertex 3.219961e-01 2.118908e+01 1.476000e+00
      vertex 3.219961e-01 2.737498e+01 1.876000e+00
      vertex 3.219961e-01 2.118908e+01 1.876000e+00
    endloop
  endfacet
  facet normal 0.000000e+00 1.000000e+00 0.000000e+00
    outer loop
      vertex 2.054047e+00 2.118908e+01 1.476000e+00
      vertex 3.219961e-01 2.118908e+01 1.476000e+00
      vertex 3.219961e-01 2.118908e+01 1.876000e+00
    endloop
  endfacet
  facet normal 0.000000e+00 1.000000e+00 0.000000e+00
    outer loop
      vertex 2.054047e+00 2.118908e+01 1.476000e+00
      vertex 3.219961e-01 2.118908e+01 1.876000e+00
      vertex 2.054047e+00 2.118908e+01 1.876000e+00
    endloop
  endfacet
  facet normal -1.000000e+00 -0.000000e+00 -0.000000e+00
    outer loop
      vertex 2.054047e+00 2.737498e+01 1.476000e+00
      vertex 2.054047e+00 2.118908e+01 1.476000e+00
      vertex 2.054047e+00 2.118908e+01 1.876000e+00
    endloop
  endfacet
  facet normal -1.000000e+00 -0.000000e+00 -0.000000e+00
    outer loop
      vertex 2.054047e+00 2.737498e+01 1.476000e+00
      vertex 2.054047e+00 2.118908e+01 1.876000e+00
      vertex 2.054047e+00 2.737498e+01 1.876000e+00
    endloop
  endfacet
  facet normal 0.000000e+00 -1.000000e+00 0.000000e+00
    outer loop
      vertex 3.219961e-01 2.737498e+01 1.476000e+00
      vertex 2.054047e+00 2.737498e+01 1.476000e+00
      vertex 2.054047e+00 2.737498e+01 1.876000e+00
    endloop
  endfacet
  facet normal 0.000000e+00 -1.000000e+00 0.000000e+00
    outer loop
      vertex 3.219961e-01 2.737498e+01 1.476000e+00
      vertex 2.054047e+00 2.737498e+01 1.876000e+00
      vertex 3.219961e-01 2.737498e+01 1.876000e+00
    endloop
  endfacet
  facet normal 1.000000e+00 0.000000e+00 0.000000e+00
    outer loop
      vertex 8.020000e+00 -2.499894e+01 1.476000e+00
      vertex 8.020000e+00 -1.881304e+01 1.476000e+00
      vertex 8.020000e+00 -1.881304e+01 1.876000e+00
    endloop
  endfacet
  facet normal 1.000000e+00 0.000000e+00 0.000000e+00
    outer loop
      vertex 8.020000e+00 -2.499894e+01 1.476000e+00
      vertex 8.020000e+00 -1.881304e+01 1.876000e+00
      vertex 8.020000e+00 -2.499894e+01 1.876000e+00
    endloop
  endfacet
  facet normal 0.000000e+00 1.000000e+00 0.000000e+00
    outer loop
      vertex 9.752050e+00 -2.499894e+01 1.476000e+00
      vertex 8.020000e+00 -2.499894e+01 1.476000e+00
      vertex 8.020000e+00 -2.499894e+01 1.876000e+00
    endloop
  endfacet
  facet normal 0.000000e+00 1.000000e+00 0.000000e+00
    outer loop
      vertex 9.752050e+00 -2.499894e+01 1.476000e+00
      vertex 8.020000e+00 -2.499894e+01 1.876000e+00
      vertex 9.752050e+00 -2.499894e+01 1.876000e+00
    endloop
  endfacet
  facet normal -1.000000e+00 -0.000000e+00 -0.000000e+00
    outer loop
      vertex 9.752050e+00 -1.881304e+01 1.476000e+00
      vertex 9.752050e+00 -2.499894e+01 1.476000e+00
      vertex 9.752050e+00 -2.499894e+01 1.876000e+00
    endloop
  endfacet
  facet normal -1.000000e+00 -0.000000e+00 -0.000000e+00
    outer loop
      vertex 9.752050e+00 -1.881304e+01 1.476000e+00
      vertex 9.752050e+00 -2.499894e+01 1.876000e+00
      vertex 9.752050e+00 -1.881304e+01 1.876000e+00
    endloop
  endfacet
  facet normal 0.000000e+00 -1.000000e+00 0.000000e+00
    outer loop
      vertex 8.020000e+00 -1.881304e+01 1.476000e+00
      vertex 9.752050e+00 -1.881304e+01 1.476000e+00
      vertex 9.752050e+00 -1.881304e+01 1.876000e+00
    endloop
  endfacet
  facet normal 0.000000e+00 -1.000000e+00 0.000000e+00
    outer loop
      vertex 8.020000e+00 -1.881304e+01 1.476000e+00
      vertex 9.752050e+00 -1.881304e+01 1.876000e+00
      vertex 8.020000e+00 -1.881304e+01 1.876000e+00
    endloop
  endfacet
  facet normal 1.000000e+00 0.000000e+00 0.000000e+00
    outer loop
      vertex 8.020000e+00 3.658509e+01 1.476000e+00
      vertex 8.020000e+00 4.277099e+01 1.476000e+00
      vertex 8.020000e+00 4.277099e+01 1.876000e+00
    endloop
  endfacet
  facet normal 1.000000e+00 0.000000e+00 0.000000e+00
    outer loop
      vertex 8.020000e+00 3.658509e+01 1.476000e+00
      vertex 8.020000e+00 4.277099e+01 1.876000e+00
      vertex 8.020000e+00 3.658509e+01 1.876000e+00
    endloop
  endfacet
  facet normal 0.000000e+00 1.000000e+00 0.000000e+00
    outer loop
      vertex 9.752050e+00 3.658509e+01 1.476000e+00
      vertex 8.020000e+00 3.658509e+01 1.476000e+00
      vertex 8.020000e+00 3.658509e+01 1.876000e+00
    endloop
  endfacet
  facet normal 0.000000e+00 1.000000e+00 0.000000e+00
    outer loop
      vertex 9.752050e+00 3.658509e+01 1.476000e+00
      vertex 8.020000e+00 3.658509e+01 1.876000e+00
      vertex 9.752050e+00 3.658509e+01 1.876000e+00
    endloop
  endfacet
  facet normal -1.000000e+00 -0.000000e+00 -0.000000e+00
    outer loop
      vertex 9.752050e+00 4.277099e+01 1.476000e+00
      vertex 9.752050e+00 3.658509e+01 1.476000e+00
      vertex 9.752050e+00 3.658509e+01 1.876000e+00
    endloop
  endfacet
  facet normal -1.000000e+00 -0.000000e+00 -0.000000e+00
    outer loop
      vertex 9.752050e+00 4.277099e+01 1.476000e+00
      vertex 9.752050e+00 3.658509e+01 1.876000e+00
      vertex 9.752050e+00 4.277099e+01 1.876000e+00
    endloop
  endfacet
  facet normal 0.000000e+00 -1.000000e+00 0.000000e+00
    outer loop
      vertex 8.020000e+00 4.277099e+01 1.476000e+00
      vertex 9.752050e+00 4.277099e+01 1.476000e+00
      vertex 9.752050e+00 4.277099e+01 1.876000e+00
    endloop
  endfacet
  facet normal 0.000000e+00 -1.000000e+00 0.000000e+00
    outer loop
      vertex 8.020000e+00 4.277099e+01 1.476000e+00
      vertex 9.752050e+00 4.277099e+01 1.876000e+00
      vertex 8.020000e+00 4.277099e+01 1.876000e+00
    endloop
  endfacet
  facet normal 1.000000e+00 0.000000e+00 0.000000e+00
    outer loop
      vertex 1.571800e+01 1.349108e+01 1.476000e+00
      vertex 1.571800e+01 1.967698e+01 1.476000e+00
      vertex 1.571800e+01 1.967698e+01 1.876000e+00
    endloop
  endfacet
  facet normal 1.000000e+00 0.000000e+00 0.000000e+00
    outer loop
      vertex 1.571800e+01 1.349108e+01 1.476000e+00
      vertex 1.571800e+01 1.967698e+01 1.876000e+00
      vertex 1.571800e+01 1.349108e+01 1.876000e+00
    endloop
  endfacet
  facet normal 0.000000e+00 1.000000e+00 0.000000e+00
    outer loop
      vertex 1.745005e+01 1.349108e+01 1.476000e+00
      vertex 1.571800e+01 1.349108e+01 1.476000e+00
      vertex 1.571800e+01 1.349108e+01 1.876000e+00
    endloop
  endfacet
  facet normal 0.000000e+00 1.000000e+00 0.000000e+00
    outer loop
      vertex 1.745005e+01 1.349108e+01 1.476000e+00
      vertex 1.571800e+01 1.349108e+01 1.876000e+00
      vertex 1.745005e+01 1.349108e+01 1.876000e+00
    endloop
  endfacet
  facet normal -1.000000e+00 -0.000000e+00 -0.000000e+00
    outer loop
      vertex 1.745005e+01 1.967698e+01 1.476000e+00
      vertex 1.745005e+01 1.349108e+01 1.476000e+00
      vertex 1.745005e+01 1.349108e+01 1.876000e+00
    endloop
  endfacet
  facet normal -1.000000e+00 -0.000000e+00 -0.000000e+00
    outer loop
      vertex 1.745005e+01 1.967698e+01 1.476000e+00
      vertex 1.745005e+01 1.349108e+01 1.876000e+00
      vertex 1.745005e+01 1.967698e+01 1.876000e+00
    endloop
  endfacet
  facet normal 0.000000e+00 -1.000000e+00 0.000000e+00
    outer loop
      vertex 1.571800e+01 1.967698e+01 1.476000e+00
      vertex 1.745005e+01 1.967698e+01 1.476000e+00
      vertex 1.745005e+01 1.967698e+01 1.876000e+00
    endloop
  endfacet
  facet normal 0.000000e+00 -1.000000e+00 0.000000e+00
    outer loop
      vertex 1.571800e+01 1.967698e+01 1.476000e+00
      vertex 1.745005e+01 1.967698e+01 1.876000e+00
      vertex 1.571800e+01 1.967698e+01 1.876000e+00
    endloop
  endfacet
  facet normal 1.000000e+00 0.000000e+00 0.000000e+00
    outer loop
      vertex 2.341601e+01 -9.602930e+00 1.476000e+00
      vertex 2.341601e+01 -3.417034e+00 1.476000e+00
      vertex 2.341601e+01 -3.417034e+00 1.876000e+00
    endloop
  endfacet
  facet normal 1.000000e+00 0.000000e+00 0.000000e+00
    outer loop
      vertex 2.341601e+01 -9.602930e+00 1.476000e+00
      vertex 2.341601e+01 -3.417034e+00 1.876000e+00
      vertex 2.341601e+01 -9.602930e+00 1.876000e+00
    endloop
  endfacet
  facet normal 0.000000e+00 1.000000e+00 0.000000e+00
    outer loop
      vertex 2.514806e+01 -9.602930e+00 1.476000e+00
      vertex 2.341601e+01 -9.602930e+00 1.476000e+00
      vertex 2.341601e+01 -9.602930e+00 1.876000e+00
    endloop
  endfacet
  facet normal 0.000000e+00 1.000000e+00 0.000000e+00
    outer loop
      vertex 2.514806e+01 -9.602930e+00 1.476000e+00
      vertex 2.341601e+01 -9.602930e+00 1.876000e+00
      vertex 2.514806e+01 -9.602930e+00 1.876000e+00
    endloop
  endfacet
  facet normal -1.000000e+00 -0.000000e+00 -0.000000e+00
    outer loop
      vertex 2.514806e+01 -3.417034e+00 1.476000e+00
      vertex 2.514806e+01 -9.602930e+00 1.476000e+00
      vertex 2.514806e+01 -9.602930e+00 1.876000e+00
    endloop
  endfacet
  facet normal -1.000000e+00 -0.000000e+00 -0.000000e+00
    outer loop
      vertex 2.514806e+01 -3.417034e+00 1.476000e+00
      vertex 2.514806e+01 -9.602930e+00 1.876000e+00
      vertex 2.514806e+01 -3.417034e+00 1.876000e+00
    endloop
  endfacet
  facet normal 0.000000e+00 -1.000000e+00 0.000000e+00
    outer loop
      vertex 2.341601e+01 -3.417034e+00 1.476000e+00
      vertex 2.514806e+01 -3.417034e+00 1.476000e+00
      vertex 2.514806e+01 -3.417034e+00 1.876000e+00
    endloop
  endfacet
  facet normal 0.000000e+00 -1.000000e+00 0.000000e+00
    outer loop
      vertex 2.341601e+01 -3.417034e+00 1.476000e+00
      vertex 2.514806e+01 -3.417034e+00 1.876000e+00
      vertex 2.341601e+01 -3.417034e+00 1.876000e+00
    endloop
  endfacet
  facet normal 1.000000e+00 0.000000e+00 0.000000e+00
    outer loop
      vertex 3.111401e+01 -4.809295e+01 1.476000e+00
      vertex 3.111401e+01 -4.190705e+01 1.476000e+00
      vertex 3.111401e+01 -4.190705e+01 1.876000e+00
    endloop
  endfacet
  facet normal 1.000000e+00 0.000000e+00 0.000000e+00
    outer loop
      vertex 3.111401e+01 -4.809295e+01 1.476000e+00
      vertex 3.111401e+01 -4.190705e+01 1.876000e+00
      vertex 3.111401e+01 -4.809295e+01 1.876000e+00
    endloop
  endfacet
  facet normal 0.000000e+00 1.000000e+00 0.000000e+00
    outer loop
      vertex 3.284606e+01 -4.809295e+01 1.476000e+00
      vertex 3.111401e+01 -4.809295e+01 1.476000e+00
      vertex 3.111401e+01 -4.809295e+01 1.876000e+00
    endloop
  endfacet
  facet normal 0.000000e+00 1.000000e+00 0.000000e+00
    outer loop
      vertex 3.284606e+01 -4.809295e+01 1.476000e+00
      vertex 3.111401e+01 -4.809295e+01 1.876000e+00
      vertex 3.284606e+01 -4.809295e+01 1.876000e+00
    endloop
  endfacet
  facet normal -1.000000e+00 -0.000000e+00 -0.000000e+00
    outer loop
      vertex 3.284606e+01 -4.190705e+01 1.476000e+00
      vertex 3.284606e+01 -4.809295e+01 1.476000e+00
      vertex 3.284606e+01 -4.809295e+01 1.876000e+00
    endloop
  endfacet
  facet normal -1.000000e+00 -0.000000e+00 -0.000000e+00
    outer loop
      vertex 3.284606e+01 -4.190705e+01 1.476000e+00
      vertex 3.284606e+01 -4.809295e+01 1.876000e+00
      vertex 3.284606e+01 -4.190705e+01 1.876000e+00
    endloop
  endfacet
  facet normal 0.000000e+00 -1.000000e+00 0.000000e+00
    outer loop
      vertex 3.111401e+01 -4.190705e+01 1.476000e+00
      vertex 3.284606e+01 -4.190705e+01 1.476000e+00
      vertex 3.284606e+01 -4.190705e+01 1.876000e+00
    endloop
  endfacet
  facet normal 0.000000e+00 -1.000000e+00 0.000000e+00
    outer loop
      vertex 3.111401e+01 -4.190705e+01 1.476000e+00
      vertex 3.284606e+01 -4.190705e+01 1.876000e+00
      vertex 3.111401e+01 -4.190705e+01 1.876000e+00
    endloop
  endfacet
  facet normal 1.000000e+00 0.000000e+00 0.000000e+00
    outer loop
      vertex -4.586602e+01 5.793077e+00 1.476000e+00
      vertex -4.586602e+01 1.197897e+01 1.476000e+00
      vertex -4.586602e+01 1.197897e+01 1.876000e+00
    endloop
  endfacet
  facet normal 1.000000e+00 0.000000e+00 0.000000e+00
    outer loop
      vertex -4.586602e+01 5.793077e+00 1.476000e+00
      vertex -4.586602e+01 1.197897e+01 1.876000e+00
      vertex -4.586602e+01 5.793077e+00 1.876000e+00
    endloop
  endfacet
  facet normal 0.000000e+00 1.000000e+00 0.000000e+00
    outer loop
      vertex -4.413398e+01 5.793077e+00 1.476000e+00
      vertex -4.586602e+01 5.793077e+00 1.476000e+00
      vertex -4.586602e+01 5.793077e+00 1.876000e+00
    endloop
  endfacet
  facet normal 0.000000e+00 1.000000e+00 0.000000e+00
    outer loop
      vertex -4.413398e+01 5.793077e+00 1.476000e+00
      vertex -4.586602e+01 5.793077e+00 1.876000e+00
      vertex -4.413398e+01 5.793077e+00 1.876000e+00
    endloop
  endfacet
  facet normal -1.000000e+00 -0.000000e+00 -0.000000e+00
    outer loop
      vertex -4.413398e+01 1.197897e+01 1.476000e+00
      vertex -4.413398e+01 5.793077e+00 1.476000e+00
      vertex -4.413398e+01 5.793077e+00 1.876000e+00
    endloop
  endfacet
  facet normal -1.000000e+00 -0.000000e+00 -0.000000e+00
    outer loop
      vertex -4.413398e+01 1.197897e+01 1.476000e+00
      vertex -4.413398e+01 5.793077e+00 1.876000e+00
      vertex -4.413398e+01 1.197897e+01 1.876000e+00
    endloop
  endfacet
  facet normal 0.000000e+00 -1.000000e+00 0.000000e+00
    outer loop
      vertex -4.586602e+01 1.197897e+01 1.476000e+00
      vertex -4.413398e+01 1.197897e+01 1.476000e+00
      vertex -4.413398e+01 1.197897e+01 1.876000e+00
    endloop
  endfacet
  facet normal 0.000000e+00 -1.000000e+00 0.000000e+00
    outer loop
      vertex -4.586602e+01 1.197897e+01 1.476000e+00
      vertex -4.413398e+01 1.197897e+01 1.876000e+00
      vertex -4.586602e+01 1.197897e+01 1.876000e+00
    endloop
  endfacet
  facet normal 1.000000e+00 0.000000e+00 0.000000e+00
    outer loop
      vertex 3.881202e+01 -1.904926e+00 1.476000e+00
      vertex 3.881202e+01 4.280970e+00 1.476000e+00
      vertex 3.881202e+01 4.280970e+00 1.876000e+00
    endloop
  endfacet
  facet normal 1.000000e+00 0.000000e+00 0.000000e+00
    outer loop
      vertex 3.881202e+01 -1.904926e+00 1.476000e+00
      vertex 3.881202e+01 4.280970e+00 1.876000e+00
      vertex 3.881202e+01 -1.904926e+00 1.876000e+00
    endloop
  endfacet
  facet normal 0.000000e+00 1.000000e+00 0.000000e+00
    outer loop
      vertex 4.054406e+01 -1.904926e+00 1.476000e+00
      vertex 3.881202e+01 -1.904926e+00 1.476000e+00
      vertex 3.881202e+01 -1.904926e+00 1.876000e+00
    endloop
  endfacet
  facet normal 0.000000e+00 1.000000e+00 0.000000e+00
    outer loop
      vertex 4.054406e+01 -1.904926e+00 1.476000e+00
      vertex 3.881202e+01 -1.904926e+00 1.876000e+00
      vertex 4.054406e+01 -1.904926e+00 1.876000e+00
    endloop
  endfacet
  facet normal -1.000000e+00 -0.000000e+00 -0.000000e+00
    outer loop
      vertex 4.054406e+01 4.280970e+00 1.476000e+00
      vertex 4.054406e+01 -1.904926e+00 1.476000e+00
      vertex 4.054406e+01 -1.904926e+00 1.876000e+00
    endloop
  endfacet
  facet normal -1.000000e+00 -0.000000e+00 -0.000000e+00
    outer loop
      vertex 4.054406e+01 4.280970e+00 1.476000e+00
      vertex 4.054406e+01 -1.904926e+00 1.876000e+00
      vertex 4.054406e+01 4.280970e+00 1.876000e+00
    endloop
  endfacet
  facet normal 0.000000e+00 -1.000000e+00 0.000000e+00
    outer loop
      vertex 3.881202e+01 4.280970e+00 1.476000e+00
      vertex 4.054406e+01 4.280970e+00 1.476000e+00
      vertex 4.054406e+01 4.280970e+00 1.876000e+00
    endloop
  endfacet
  facet normal 0.000000e+00 -1.000000e+00 0.000000e+00
    outer loop
      vertex 3.881202e+01 4.280970e+00 1.476000e+00
      vertex 4.054406e+01 4.280970e+00 1.876000e+00
      vertex 3.881202e+01 4.280970e+00 1.876000e+00
    endloop
  endfacet
  facet normal 1.000000e+00 0.000000e+00 0.000000e+00
    outer loop
      vertex -4.586602e+01 1.349108e+01 1.476000e+00
      vertex -4.586602e+01 1.967698e+01 1.476000e+00
      vertex -4.586602e+01 1.967698e+01 1.876000e+00
    endloop
  endfacet
  facet normal 1.000000e+00 0.000000e+00 0.000000e+00
    outer loop
      vertex -4.586602e+01 1.349108e+01 1.476000e+00
      vertex -4.586602e+01 1.967698e+01 1.876000e+00
      vertex -4.586602e+01 1.349108e+01 1.876000e+00
    endloop
  endfacet
  facet normal 0.000000e+00 1.000000e+00 0.000000e+00
    outer loop
      vertex -4.413398e+01 1.349108e+01 1.476000e+00
      vertex -4.586602e+01 1.349108e+01 1.476000e+00
      vertex -4.586602e+01 1.349108e+01 1.876000e+00
    endloop
  endfacet
  facet normal 0.000000e+00 1.000000e+00 0.000000e+00
    outer loop
      vertex -4.413398e+01 1.349108e+01 1.476000e+00
      vertex -4.586602e+01 1.349108e+01 1.876000e+00
      vertex -4.413398e+01 1.349108e+01 1.876000e+00
    endloop
  endfacet
  facet normal -1.000000e+00 -0.000000e+00 -0.000000e+00
    outer loop
      vertex -4.413398e+01 1.967698e+01 1.476000e+00
      vertex -4.413398e+01 1.349108e+01 1.476000e+00
      vertex -4.413398e+01 1.349108e+01 1.876000e+00
    endloop
  endfacet
  facet normal -1.000000e+00 -0.000000e+00 -0.000000e+00
    outer loop
      vertex -4.413398e+01 1.967698e+01 1.476000e+00
      vertex -4.413398e+01 1.349108e+01 1.876000e+00
      vertex -4.413398e+01 1.967698e+01 1.876000e+00
    endloop
  endfacet
  facet normal 0.000000e+00 -1.000000e+00 0.000000e+00
    outer loop
      vertex -4.586602e+01 1.967698e+01 1.476000e+00
      vertex -4.413398e+01 1.967698e+01 1.476000e+00
      vertex -4.413398e+01 1.967698e+01 1.876000e+00
    endloop
  endfacet
  facet normal 0.000000e+00 -1.000000e+00 0.000000e+00
    outer loop
      vertex -4.586602e+01 1.967698e+01 1.476000e+00
      vertex -4.413398e+01 1.967698e+01 1.876000e+00
      vertex -4.586602e+01 1.967698e+01 1.876000e+00
    endloop
  endfacet
  facet normal -0.000000e+00 -1.000000e+00 -0.000000e+00
    outer loop
      vertex -5.000000e+01 -5.000000e+01 -1.524000e+00
      vertex -5.000000e+01 -5.000000e+01 -1.924000e+00
      vertex 5.000000e+01 -5.000000e+01 -1.924000e+00
    endloop
  endfacet
  facet normal -0.000000e+00 -1.000000e+00 -0.000000e+00
    outer loop
      vertex -5.000000e+01 -5.000000e+01 -1.524000e+00
      vertex 5.000000e+01 -5.000000e+01 -1.924000e+00
      vertex 5.000000e+01 -5.000000e+01 -1.524000e+00
    endloop
  endfacet
  facet normal -1.000000e+00 -0.000000e+00 -0.000000e+00
    outer loop
      vertex -5.000000e+01 5.000000e+01 -1.524000e+00
      vertex -5.000000e+01 5.000000e+01 -1.924000e+00
      vertex -5.000000e+01 -5.000000e+01 -1.924000e+00
    endloop
  endfacet
  facet normal -1.000000e+00 -0.000000e+00 -0.000000e+00
    outer loop
      vertex -5.000000e+01 5.000000e+01 -1.524000e+00
      vertex -5.000000e+01 -5.000000e+01 -1.924000e+00
      vertex -5.000000e+01 -5.000000e+01 -1.524000e+00
    endloop
  endfacet
  facet normal -0.000000e+00 1.000000e+00 -0.000000e+00
    outer loop
      vertex 5.000000e+01 5.000000e+01 -1.524000e+00
      vertex 5.000000e+01 5.000000e+01 -1.924000e+00
      vertex -5.000000e+01 5.000000e+01 -1.924000e+00
    endloop
  endfacet
  facet normal -0.000000e+00 1.000000e+00 -0.000000e+00
    outer loop
      vertex 5.000000e+01 5.000000e+01 -1.524000e+00
      vertex -5.000000e+01 5.000000e+01 -1.924000e+00
      vertex -5.000000e+01 5.000000e+01 -1.524000e+00
    endloop
  endfacet
  facet normal 1.000000e+00 -0.000000e+00 -0.000000e+00
    outer loop
      vertex 5.000000e+01 -5.000000e+01 -1.524000e+00
      vertex 5.000000e+01 -5.000000e+01 -1.924000e+00
      vertex 5.000000e+01 5.000000e+01 -1.924000e+00
    endloop
  endfacet
  facet normal 1.000000e+00 -0.000000e+00 -0.000000e+00
    outer loop
      vertex 5.000000e+01 -5.000000e+01 -1.524000e+00
      vertex 5.000000e+01 5.000000e+01 -1.924000e+00
      vertex 5.000000e+01 5.000000e+01 -1.524000e+00
    endloop
  endfacet
endsolid component1:Electrifi
